# Supplementary material
Source: publisher figshare collection journal article supplement (https://acs.figshare.com/ndownloader/files/4503502)
Supplement: Supplementary file 1 [file 4503502]

 
data_IIIFeCu4Dy2

# Name and address of author for correspondence

_publ_contact_author_name        'Noritaka Mizuno'
_publ_contact_author_address     
;
Department of Applied Chemistry, School of Engineering
The University of Tokyo
7-3-1 Hongo, Bunkyo-ku, Tokyo 113-8656 (Japan)
;
_publ_contact_author_email       tmizuno@mail.ecc.u-tokyo.ac.jp
_publ_contact_author_phone       (+)81-3-5841-7272
_publ_contact_author_fax         (+)81-3-5841-7220
loop_
_publ_author_name
_publ_author_address
'Noritaka Mizuno'
;
Department of Applied Chemistry, School of Engineering
The University of Tokyo
7-3-1 Hongo, Bunkyo-ku, Tokyo 113-8656 (Japan)
;              

_audit_creation_method            SHELXL-2013
_chemical_name_systematic
;
 ?
;
_chemical_name_common             ?
_chemical_melting_point           ?
_chemical_formula_moiety          ?
_chemical_formula_sum
 'C122 Cl12 Cu4 Dy2 F24 Fe N6 O80 Si2 W18' 
_chemical_formula_weight          7711.17

loop_
 _atom_type_symbol
 _atom_type_description
 _atom_type_scat_dispersion_real
 _atom_type_scat_dispersion_imag
 _atom_type_scat_source
 'W'  'W'  -0.8490   6.8722
 'International Tables Vol C Tables 4.2.6.8 and 6.1.1.4'
 'Dy'  'Dy'  -0.1892   4.4098
 'International Tables Vol C Tables 4.2.6.8 and 6.1.1.4'
 'Cu'  'Cu'   0.3201   1.2651
 'International Tables Vol C Tables 4.2.6.8 and 6.1.1.4'
 'Fe'  'Fe'   0.3463   0.8444
 'International Tables Vol C Tables 4.2.6.8 and 6.1.1.4'
 'Si'  'Si'   0.0817   0.0704
 'International Tables Vol C Tables 4.2.6.8 and 6.1.1.4'
 'F'  'F'   0.0171   0.0103
 'International Tables Vol C Tables 4.2.6.8 and 6.1.1.4'
 'O'  'O'   0.0106   0.0060
 'International Tables Vol C Tables 4.2.6.8 and 6.1.1.4'
 'N'  'N'   0.0061   0.0033
 'International Tables Vol C Tables 4.2.6.8 and 6.1.1.4'
 'C'  'C'   0.0033   0.0016
 'International Tables Vol C Tables 4.2.6.8 and 6.1.1.4'
 'Cl'  'Cl'   0.1484   0.1585
 'International Tables Vol C Tables 4.2.6.8 and 6.1.1.4'
 
_space_group_crystal_system       monoclinic
_space_group_IT_number            14
_space_group_name_H-M_alt         'P 21/n'
_space_group_name_Hall            '-P 2yn'
 
_shelx_space_group_comment
;
The symmetry employed for this shelxl refinement is uniquely defined
by the following loop, which should always be used as a source of
symmetry information in preference to the above space-group names.
They are only intended as comments.
;
 
loop_
 _space_group_symop_operation_xyz
 'x, y, z'
 '-x+1/2, y+1/2, -z+1/2'
 '-x, -y, -z'
 'x-1/2, -y-1/2, z-1/2'
 
_cell_length_a                    19.74030(10)
_cell_length_b                    20.1328(2)
_cell_length_c                    26.5264(2)
_cell_angle_alpha                 90
_cell_angle_beta                  100.6942(4)
_cell_angle_gamma                 90
_cell_volume                      10359.22(14)
_cell_formula_units_Z             2
_cell_measurement_temperature     113(2)
_cell_measurement_reflns_used     24212 
_cell_measurement_theta_min       1.99
_cell_measurement_theta_max       25.24
 
_exptl_crystal_description        plate
_exptl_crystal_colour             yellow
_exptl_crystal_density_meas       ?
_exptl_crystal_density_method     'not measured'
_exptl_crystal_density_diffrn     2.472           
_exptl_crystal_F_000              6936
_exptl_transmission_factor_min    ?                                             
_exptl_transmission_factor_max    ?                                             
_exptl_crystal_size_max           0.100
_exptl_crystal_size_mid           0.100
_exptl_crystal_size_min           0.020
_exptl_absorpt_coefficient_mu     11.389
_shelx_estimated_absorpt_T_min    0.395
_shelx_estimated_absorpt_T_max    0.804
_exptl_absorpt_correction_type    empirical
_exptl_absorpt_correction_T_min   0.478
_exptl_absorpt_correction_T_max   0.796
_exptl_absorpt_process_details    'HKL2000 DENZO SCALEPACK'
 
_exptl_special_details
;
 ?
;
 
_diffrn_ambient_temperature       113(2)
_diffrn_radiation_wavelength      0.71069
_diffrn_radiation_type            MoK\a
_diffrn_source                    ?                       
_diffrn_measurement_device_type   CCD 
_diffrn_measurement_method        ? 
_diffrn_detector_area_resol_mean  ? 
_diffrn_reflns_number             28694
_diffrn_reflns_av_unetI/netI      0.0327
_diffrn_reflns_av_R_equivalents   ?
_diffrn_reflns_limit_h_min        ?
_diffrn_reflns_limit_h_max        ?
_diffrn_reflns_limit_k_min        ?
_diffrn_reflns_limit_k_max        ?
_diffrn_reflns_limit_l_min        ?
_diffrn_reflns_limit_l_max        ?
_diffrn_reflns_theta_min          1.989
_diffrn_reflns_theta_max          29.590
_diffrn_reflns_theta_full         25.240
_diffrn_measured_fraction_theta_max   0.986
_diffrn_measured_fraction_theta_full  0.992
_diffrn_reflns_Laue_measured_fraction_max    0.986
_diffrn_reflns_Laue_measured_fraction_full   0.992
_diffrn_reflns_point_group_measured_fraction_max   0.986
_diffrn_reflns_point_group_measured_fraction_full  0.992
_reflns_number_total              28691
_reflns_number_gt                 24518
_reflns_threshold_expression      'I > 2\s(I)'
_reflns_Friedel_coverage          0.000
_reflns_Friedel_fraction_max      .
_reflns_Friedel_fraction_full     .
 
_reflns_special_details
;
 Data were apparently pre-merged, so _diffrn_reflns_number
 etc. will have to be added later.
 
 Reflections were merged by SHELXL according to the crystal
 class for the calculation of statistics and refinement.
 
 _reflns_Friedel_fraction is defined as the number of unique
 Friedel pairs measured divided by the number that would be
 possible theoretically, ignoring centric projections and
 systematic absences.
;
 
_computing_data_collection       'Rigaku CrystalClear'
_computing_cell_refinement       HKL2000
_computing_data_reduction        HKL2000
_computing_structure_solution     'SHELXS-97 (Sheldrick, 1990)' 
_computing_structure_refinement   'SHELXL-2013 (Sheldrick, 2013)'
_computing_molecular_graphics     ?
_computing_publication_material   ?
 
_refine_special_details
;
 ?
;
_refine_ls_structure_factor_coef  Fsqd
_refine_ls_matrix_type            full
_refine_ls_weighting_scheme       calc
_refine_ls_weighting_details
'w=1/[\s^2^(Fo^2^)+(0.0731P)^2^+174.6156P] where P=(Fo^2^+2Fc^2^)/3'
_atom_sites_solution_primary      ?
_atom_sites_solution_secondary    ?
_atom_sites_solution_hydrogens    none
_refine_ls_hydrogen_treatment     none
_refine_ls_extinction_method      none
_refine_ls_extinction_coef        .
_refine_ls_number_reflns          28691
_refine_ls_number_parameters      807
_refine_ls_number_restraints      1
_refine_ls_R_factor_all           0.0627
_refine_ls_R_factor_gt            0.0526
_refine_ls_wR_factor_ref          0.1466
_refine_ls_wR_factor_gt           0.1373
_refine_ls_goodness_of_fit_ref    1.013
_refine_ls_restrained_S_all       1.013
_refine_ls_shift/su_max           0.002
_refine_ls_shift/su_mean          0.000
 
loop_
 _atom_site_label
 _atom_site_type_symbol
 _atom_site_fract_x
 _atom_site_fract_y
 _atom_site_fract_z
 _atom_site_U_iso_or_equiv
 _atom_site_adp_type
 _atom_site_occupancy
 _atom_site_site_symmetry_order  
 _atom_site_calc_flag
 _atom_site_refinement_flags_posn
 _atom_site_refinement_flags_adp
 _atom_site_refinement_flags_occupancy
 _atom_site_disorder_assembly
 _atom_site_disorder_group
W1 W 0.37396(2) 0.56998(2) 0.54560(2) 0.02548(7) Uani 1 1 d . . . . .
W2 W 0.54067(2) 0.58547(2) 0.60559(2) 0.02666(7) Uani 1 1 d . . . . .
W3 W 0.66156(2) 0.68324(2) 0.54513(2) 0.03311(8) Uani 1 1 d . . . . .
W4 W 0.61170(2) 0.75168(2) 0.43048(2) 0.02789(7) Uani 1 1 d . . . . .
W5 W 0.42554(2) 0.73629(2) 0.36491(2) 0.02963(8) Uani 1 1 d . . . . .
W6 W 0.31698(2) 0.64404(2) 0.41697(2) 0.03127(8) Uani 1 1 d . . . . .
W7 W 0.35809(2) 0.75277(2) 0.53282(2) 0.03008(8) Uani 1 1 d . . . . .
W8 W 0.52115(2) 0.76915(2) 0.59584(2) 0.02997(8) Uani 1 1 d . . . . .
W9 W 0.47249(2) 0.84056(2) 0.48110(2) 0.02786(7) Uani 1 1 d . . . . .
Dy1 Dy 0.55932(2) 0.65494(2) 0.32296(2) 0.03475(9) Uani 1 1 d . . . . .
Cu1 Cu 0.61509(5) 0.59148(5) 0.44159(4) 0.02785(19) Uani 1 1 d . . . . .
Cu2 Cu 0.44472(5) 0.57436(5) 0.37974(4) 0.02735(19) Uani 1 1 d . . . . .
Fe1 Fe 0.5000 0.5000 0.5000 0.0235(3) Uani 1 2 d S . P . .
Si1 Si 0.48749(11) 0.66651(10) 0.48639(8) 0.0219(4) Uani 1 1 d . . . . .
O1 O 0.4107(3) 0.4882(3) 0.5242(2) 0.0271(11) Uani 1 1 d . . . . .
O2 O 0.4531(3) 0.4992(3) 0.4267(2) 0.0266(11) Uani 1 1 d . . . . .
O3 O 0.6879(3) 0.6109(3) 0.5016(2) 0.0308(12) Uani 1 1 d . . . . .
O4 O 0.6377(3) 0.6707(3) 0.4035(2) 0.0334(13) Uani 1 1 d . . . . .
O5 O 0.4426(3) 0.6514(3) 0.3323(2) 0.0298(12) Uani 1 1 d . . . . .
O6 O 0.3456(3) 0.5768(3) 0.3764(2) 0.0295(12) Uani 1 1 d . . . . .
O7 O 0.3065(3) 0.5375(3) 0.5700(2) 0.0326(12) Uani 1 1 d . . . . .
O8 O 0.5748(3) 0.5624(3) 0.6673(2) 0.0338(13) Uani 1 1 d . . . . .
O9 O 0.7385(3) 0.6914(3) 0.5865(2) 0.0344(13) Uani 1 1 d . . . . .
O10 O 0.6536(3) 0.8093(3) 0.3995(2) 0.0348(13) Uani 1 1 d . . . . .
O11 O 0.4090(3) 0.7857(3) 0.3115(2) 0.0351(13) Uani 1 1 d . . . . .
O12 O 0.2292(3) 0.6384(3) 0.4003(2) 0.0343(13) Uani 1 1 d . . . . .
O13 O 0.4447(3) 0.5663(3) 0.6071(2) 0.0277(11) Uani 1 1 d . . . . .
O14 O 0.6172(3) 0.6157(3) 0.5791(2) 0.0280(11) Uani 1 1 d . . . . .
O15 O 0.6774(3) 0.7441(3) 0.4927(2) 0.0313(12) Uani 1 1 d . . . . .
O16 O 0.5272(3) 0.7392(3) 0.3783(2) 0.0299(12) Uani 1 1 d . . . . .
O17 O 0.3351(3) 0.7099(3) 0.3683(2) 0.0297(12) Uani 1 1 d . . . . .
O18 O 0.3339(3) 0.5873(3) 0.4761(2) 0.0282(11) Uani 1 1 d . . . . .
O19 O 0.4805(3) 0.5984(3) 0.5196(2) 0.0255(11) Uani 1 1 d . . . . .
O20 O 0.5673(3) 0.6745(3) 0.4798(2) 0.0256(11) Uani 1 1 d . . . . .
O21 O 0.4362(3) 0.6616(3) 0.4314(2) 0.0259(11) Uani 1 1 d . . . . .
O22 O 0.4662(3) 0.7320(3) 0.5163(2) 0.0264(11) Uani 1 1 d . . . . .
O23 O 0.3655(3) 0.6625(3) 0.5574(2) 0.0290(12) Uani 1 1 d . . . . .
O24 O 0.5199(3) 0.6770(3) 0.6136(2) 0.0289(12) Uani 1 1 d . . . . .
O25 O 0.6059(3) 0.7453(3) 0.5726(2) 0.0289(12) Uani 1 1 d . . . . .
O26 O 0.5559(3) 0.8106(3) 0.4631(2) 0.0283(11) Uani 1 1 d . . . . .
O27 O 0.4289(3) 0.8007(3) 0.4174(2) 0.0307(12) Uani 1 1 d . . . . .
O28 O 0.3233(3) 0.7169(3) 0.4678(2) 0.0299(12) Uani 1 1 d . . . . .
O29 O 0.4247(3) 0.7759(3) 0.5954(2) 0.0300(12) Uani 1 1 d . . . . .
O30 O 0.5154(3) 0.8455(3) 0.5519(2) 0.0287(12) Uani 1 1 d . . . . .
O31 O 0.3856(3) 0.8331(3) 0.5032(2) 0.0293(12) Uani 1 1 d . . . . .
O32 O 0.2845(3) 0.7806(3) 0.5517(3) 0.0359(14) Uani 1 1 d . . . . .
O33 O 0.5517(4) 0.8062(3) 0.6537(3) 0.0392(15) Uani 1 1 d . . . . .
O34 O 0.4724(3) 0.9230(3) 0.4656(2) 0.0339(13) Uani 1 1 d . . . . .
O35 O 0.5455(3) 0.5697(3) 0.3789(2) 0.0290(12) Uani 1 1 d . . . . .
O36 O 0.5097(4) 0.5796(4) 0.2599(3) 0.0473(17) Uani 1 1 d . . . . .
O37 O 0.6460(4) 0.5850(4) 0.3076(3) 0.0432(16) Uani 1 1 d . . . . .
O38 O 0.5022(4) 0.7176(4) 0.2531(3) 0.0485(18) Uani 1 1 d . . . . .
O39 O 0.6392(4) 0.7285(4) 0.3001(3) 0.0483(17) Uani 1 1 d . . . . .
C1 C 0.4772(8) 0.5090(8) 0.1901(6) 0.072(4) Uiso 1 1 d . . . . .
C2 C 0.5329(6) 0.5370(6) 0.2334(4) 0.048(2) Uiso 1 1 d . . . . .
C3 C 0.5994(6) 0.5125(6) 0.2391(5) 0.052(3) Uiso 1 1 d . . . . .
C4 C 0.6514(6) 0.5396(6) 0.2762(4) 0.045(2) Uiso 1 1 d . . . . .
C5 C 0.7240(7) 0.5151(7) 0.2789(5) 0.058(3) Uiso 1 1 d . . . . .
C6 C 0.4533(7) 0.8024(7) 0.1965(5) 0.056(3) Uiso 1 1 d . . . . .
C7 C 0.5129(6) 0.7736(6) 0.2360(5) 0.051(3) Uiso 1 1 d . . . . .
C8 C 0.5716(7) 0.8098(7) 0.2474(5) 0.063(3) Uiso 1 1 d . . . . .
C9 C 0.6315(6) 0.7836(6) 0.2765(5) 0.051(3) Uiso 1 1 d . . . . .
C10 C 0.6971(7) 0.8241(6) 0.2786(5) 0.053(3) Uiso 1 1 d . . . . .
F1 F 0.4294(5) 0.4760(5) 0.2080(4) 0.092(3) Uiso 1 1 d . . . . .
F2 F 0.5014(6) 0.4680(6) 0.1590(4) 0.101(3) Uiso 1 1 d . . . . .
F3 F 0.4464(7) 0.5582(7) 0.1612(5) 0.116(4) Uiso 1 1 d . . . . .
F4 F 0.7474(5) 0.4812(5) 0.3222(4) 0.081(2) Uiso 1 1 d . . . . .
F5 F 0.7668(5) 0.5651(5) 0.2769(4) 0.085(3) Uiso 1 1 d . . . . .
F6 F 0.7328(6) 0.4752(6) 0.2411(4) 0.096(3) Uiso 1 1 d . . . . .
F7 F 0.3965(4) 0.7713(4) 0.1916(3) 0.070(2) Uiso 1 1 d . . . . .
F8 F 0.4411(5) 0.8667(5) 0.2091(4) 0.081(2) Uiso 1 1 d . . . . .
F9 F 0.4717(5) 0.8053(5) 0.1511(4) 0.081(2) Uiso 1 1 d . . . . .
F10 F 0.6969(5) 0.8803(5) 0.3037(4) 0.092(3) Uiso 1 1 d . . . . .
F11 F 0.7052(7) 0.8421(7) 0.2323(5) 0.117(4) Uiso 1 1 d . . . . .
F12 F 0.7517(9) 0.7945(9) 0.2994(7) 0.156(6) Uiso 1 1 d . . . . .
O1W O 0.6660(4) 0.5171(4) 0.5634(3) 0.055(2) Uiso 1 1 d . . . . .
N101 N 0.2067(4) 0.7890(4) 0.2585(3) 0.0411(18) Uiso 1 1 d . . . . .
C101 C 0.1363(6) 0.7579(6) 0.2566(4) 0.044(2) Uiso 1 1 d . . . . .
C102 C 0.1350(6) 0.6995(6) 0.2928(5) 0.052(3) Uiso 1 1 d . . . . .
C103 C 0.0600(7) 0.6805(7) 0.2922(5) 0.061(3) Uiso 1 1 d . . . . .
C104 C 0.0549(8) 0.6224(8) 0.3300(6) 0.073(4) Uiso 1 1 d . . . . .
C111 C 0.1985(6) 0.8446(6) 0.2188(4) 0.044(2) Uiso 1 1 d . . . . .
C112 C 0.2634(6) 0.8846(6) 0.2180(5) 0.054(3) Uiso 1 1 d . . . . .
C113 C 0.2473(6) 0.9424(6) 0.1794(4) 0.050(2) Uiso 1 1 d . . . . .
C114 C 0.3098(7) 0.9877(6) 0.1809(5) 0.054(3) Uiso 1 1 d . . . . .
C121 C 0.2593(6) 0.7376(6) 0.2490(4) 0.043(2) Uiso 1 1 d . . . . .
C122 C 0.2444(6) 0.7007(6) 0.1980(4) 0.046(2) Uiso 1 1 d . . . . .
C123 C 0.2986(6) 0.6451(6) 0.1989(5) 0.051(3) Uiso 1 1 d . . . . .
C124 C 0.2826(8) 0.5845(7) 0.2309(6) 0.064(3) Uiso 1 1 d . . . . .
C131 C 0.2345(5) 0.8176(5) 0.3123(4) 0.039(2) Uiso 1 1 d . . . . .
C132 C 0.1923(6) 0.8724(6) 0.3306(5) 0.050(2) Uiso 1 1 d . . . . .
C133 C 0.2265(8) 0.8869(8) 0.3885(6) 0.068(4) Uiso 1 1 d . . . . .
C134 C 0.1879(10) 0.9439(10) 0.4092(8) 0.091(5) Uiso 1 1 d . . . . .
N201 N 0.1125(5) 0.6497(5) 0.5391(3) 0.0436(19) Uiso 1 1 d . . . . .
C201 C 0.0634(6) 0.6132(6) 0.5684(5) 0.052(3) Uiso 1 1 d . . . . .
C202 C 0.0995(6) 0.5744(6) 0.6153(5) 0.050(3) Uiso 1 1 d . . . . .
C203 C 0.0438(7) 0.5377(7) 0.6393(5) 0.059(3) Uiso 1 1 d . . . . .
C204 C 0.0770(8) 0.5058(8) 0.6910(6) 0.070(4) Uiso 1 1 d . . . . .
C211 C 0.1599(6) 0.6006(6) 0.5174(4) 0.049(2) Uiso 1 1 d . . . . .
C212 C 0.1214(6) 0.5454(6) 0.4854(5) 0.053(3) Uiso 1 1 d . . . . .
C213 C 0.1751(6) 0.4995(6) 0.4665(5) 0.053(3) Uiso 1 1 d . . . . .
C214 C 0.1410(7) 0.4380(7) 0.4389(5) 0.061(3) Uiso 1 1 d . . . . .
C221 C 0.0672(6) 0.6887(6) 0.4971(5) 0.051(3) Uiso 1 1 d . . . . .
C222 C 0.1059(8) 0.7289(8) 0.4623(6) 0.068(4) Uiso 1 1 d . . . . .
C223 C 0.0575(8) 0.7699(8) 0.4226(6) 0.072(4) Uiso 1 1 d . . . . .
C224 C 0.0213(12) 0.8286(12) 0.4439(9) 0.106(6) Uiso 1 1 d . . . . .
C231 C 0.1609(6) 0.6962(6) 0.5763(4) 0.050(2) Uiso 1 1 d . . . . .
C232 C 0.1234(6) 0.7489(6) 0.6020(5) 0.052(3) Uiso 1 1 d . . . . .
C233 C 0.1758(7) 0.7882(7) 0.6386(5) 0.062(3) Uiso 1 1 d . . . . .
C234 C 0.1431(7) 0.8411(7) 0.6682(5) 0.059(3) Uiso 1 1 d . . . . .
N301 N 0.6527(4) 1.0131(4) 0.4024(3) 0.0350(16) Uiso 1 1 d . . . . .
C301 C 0.6448(5) 1.0834(5) 0.3816(4) 0.039(2) Uiso 1 1 d . . . . .
C302 C 0.6512(6) 1.0912(6) 0.3257(4) 0.046(2) Uiso 1 1 d . . . . .
C303 C 0.6295(6) 1.1623(6) 0.3068(4) 0.049(2) Uiso 1 1 d . . . . .
C304 C 0.6396(7) 1.1758(7) 0.2524(5) 0.059(3) Uiso 1 1 d . . . . .
C311 C 0.7219(5) 0.9838(5) 0.3964(4) 0.042(2) Uiso 1 1 d . . . . .
C312 C 0.7851(6) 1.0207(6) 0.4259(4) 0.049(2) Uiso 1 1 d . . . . .
C313 C 0.8505(8) 0.9851(8) 0.4153(6) 0.069(4) Uiso 1 1 d . . . . .
C314 C 0.9157(9) 1.0191(9) 0.4485(7) 0.082(4) Uiso 1 1 d . . . . .
C321 C 0.5974(5) 0.9675(5) 0.3716(4) 0.0369(19) Uiso 1 1 d . . . . .
C322 C 0.5253(5) 0.9924(5) 0.3656(4) 0.039(2) Uiso 1 1 d . . . . .
C323 C 0.4770(6) 0.9396(6) 0.3373(4) 0.049(2) Uiso 1 1 d . . . . .
C324 C 0.4002(8) 0.9595(8) 0.3331(6) 0.068(4) Uiso 1 1 d . . . . .
C331 C 0.6452(5) 1.0152(5) 0.4584(4) 0.0367(19) Uiso 1 1 d . . . . .
C332 C 0.6641(5) 0.9521(5) 0.4890(4) 0.040(2) Uiso 1 1 d . . . . .
C333 C 0.6461(5) 0.9598(5) 0.5427(4) 0.041(2) Uiso 1 1 d . . . . .
C334 C 0.6765(6) 0.9034(6) 0.5781(4) 0.047(2) Uiso 1 1 d . . . . .
C11 C 0.9377(14) 0.8391(13) 0.2062(11) 0.125(8) Uiso 1 1 d . . . . .
Cl11 Cl 0.8406(3) 0.8464(3) 0.1884(2) 0.1089(16) Uiso 1 1 d . . . . .
Cl12 Cl 0.9604(4) 0.8416(4) 0.2663(3) 0.151(3) Uiso 1 1 d . . . . .
C21 C 0.3329(8) 0.7016(8) 0.0468(6) 0.071(4) Uiso 1 1 d . . . . .
Cl21 Cl 0.3675(3) 0.6201(3) 0.0419(3) 0.1191(18) Uiso 1 1 d . . . . .
Cl22 Cl 0.3867(4) 0.7613(4) 0.0267(3) 0.145(2) Uiso 1 1 d . . . . .
C31 C 0.1203(7) 0.3935(7) 0.5827(5) 0.063(3) Uiso 1 1 d D . . . .
Cl31 Cl 0.2061(8) 0.4059(8) 0.5838(6) 0.265(6) Uiso 1 1 d . . . . .
Cl32 Cl 0.1581(17) 0.3057(12) 0.6074(13) 0.54(2) Uiso 1 1 d D . . . .
 
loop_
 _atom_site_aniso_label
 _atom_site_aniso_U_11
 _atom_site_aniso_U_22
 _atom_site_aniso_U_33
 _atom_site_aniso_U_23
 _atom_site_aniso_U_13
 _atom_site_aniso_U_12
W1 0.02691(14) 0.02129(15) 0.02623(14) 0.00114(11) -0.00030(11) 0.00114(11)
W2 0.03239(16) 0.02006(14) 0.02330(14) 0.00049(10) -0.00582(11) -0.00035(11)
W3 0.03025(16) 0.03090(18) 0.03304(16) 0.00495(13) -0.00746(13) -0.00610(13)
W4 0.03051(16) 0.02055(15) 0.03075(15) 0.00167(11) 0.00081(12) -0.00174(11)
W5 0.03422(17) 0.02572(16) 0.02541(15) 0.00510(11) -0.00365(12) 0.00026(12)
W6 0.02716(15) 0.03231(18) 0.03027(16) 0.00689(13) -0.00523(12) 0.00141(13)
W7 0.03093(16) 0.02091(15) 0.03785(17) -0.00092(12) 0.00492(13) 0.00316(12)
W8 0.03975(18) 0.01977(15) 0.02559(15) -0.00158(11) -0.00645(12) -0.00081(12)
W9 0.03350(16) 0.01883(15) 0.02880(15) 0.00175(11) -0.00064(12) 0.00195(12)
Dy1 0.0420(2) 0.0288(2) 0.03301(19) 0.00130(15) 0.00573(16) -0.00051(16)
Cu1 0.0313(5) 0.0216(5) 0.0287(5) -0.0005(4) 0.0003(4) -0.0010(4)
Cu2 0.0321(5) 0.0225(5) 0.0244(4) 0.0008(3) -0.0024(4) 0.0007(4)
Fe1 0.0267(7) 0.0184(7) 0.0227(7) 0.0001(5) -0.0026(5) 0.0007(6)
Si1 0.0253(9) 0.0166(9) 0.0218(9) 0.0005(7) -0.0013(7) 0.0011(7)
O1 0.026(3) 0.023(3) 0.030(3) -0.001(2) -0.002(2) 0.002(2)
O2 0.030(3) 0.022(3) 0.024(2) 0.003(2) -0.005(2) -0.002(2)
O3 0.029(3) 0.020(3) 0.040(3) 0.002(2) -0.001(2) 0.003(2)
O4 0.042(3) 0.022(3) 0.037(3) 0.003(2) 0.008(3) -0.001(2)
O5 0.035(3) 0.022(3) 0.029(3) 0.003(2) 0.000(2) 0.001(2)
O6 0.034(3) 0.022(3) 0.027(3) -0.002(2) -0.007(2) 0.001(2)
O7 0.033(3) 0.029(3) 0.034(3) 0.004(2) 0.003(2) 0.001(2)
O8 0.040(3) 0.026(3) 0.031(3) -0.003(2) -0.006(2) -0.005(2)
O9 0.039(3) 0.023(3) 0.038(3) 0.001(2) -0.001(3) -0.003(2)
O10 0.042(3) 0.023(3) 0.039(3) -0.002(2) 0.007(3) -0.002(3)
O11 0.042(3) 0.024(3) 0.035(3) 0.002(2) -0.002(3) 0.000(3)
O12 0.037(3) 0.029(3) 0.033(3) 0.002(2) -0.005(2) 0.001(2)
O13 0.037(3) 0.023(3) 0.020(2) -0.001(2) -0.002(2) 0.001(2)
O14 0.033(3) 0.014(2) 0.033(3) 0.002(2) -0.004(2) -0.001(2)
O15 0.033(3) 0.022(3) 0.036(3) 0.001(2) 0.000(2) -0.002(2)
O16 0.037(3) 0.020(3) 0.030(3) -0.001(2) 0.000(2) 0.002(2)
O17 0.030(3) 0.028(3) 0.028(3) 0.002(2) -0.002(2) 0.002(2)
O18 0.030(3) 0.023(3) 0.028(3) 0.003(2) -0.003(2) 0.002(2)
O19 0.033(3) 0.016(2) 0.025(2) 0.0001(19) -0.002(2) 0.000(2)
O20 0.026(3) 0.020(3) 0.029(3) 0.001(2) -0.002(2) -0.001(2)
O21 0.031(3) 0.021(3) 0.022(2) 0.0007(19) -0.004(2) 0.003(2)
O22 0.029(3) 0.021(3) 0.026(3) -0.001(2) -0.002(2) 0.003(2)
O23 0.036(3) 0.018(3) 0.032(3) 0.001(2) 0.003(2) -0.001(2)
O24 0.036(3) 0.020(3) 0.028(3) -0.001(2) 0.001(2) 0.001(2)
O25 0.031(3) 0.020(3) 0.034(3) -0.001(2) 0.000(2) -0.001(2)
O26 0.031(3) 0.025(3) 0.028(3) -0.001(2) 0.004(2) 0.003(2)
O27 0.039(3) 0.023(3) 0.026(3) -0.004(2) -0.002(2) 0.000(2)
O28 0.033(3) 0.022(3) 0.031(3) 0.000(2) -0.003(2) 0.004(2)
O29 0.036(3) 0.022(3) 0.031(3) 0.000(2) 0.002(2) 0.003(2)
O30 0.036(3) 0.022(3) 0.025(3) -0.001(2) -0.002(2) -0.003(2)
O31 0.032(3) 0.025(3) 0.029(3) 0.000(2) 0.001(2) 0.005(2)
O32 0.035(3) 0.024(3) 0.049(4) -0.006(3) 0.010(3) 0.002(2)
O33 0.049(4) 0.027(3) 0.037(3) -0.001(3) -0.004(3) 0.003(3)
O34 0.047(4) 0.023(3) 0.032(3) 0.003(2) 0.007(3) 0.004(3)
O35 0.037(3) 0.020(3) 0.028(3) 0.000(2) 0.001(2) 0.002(2)
O36 0.061(5) 0.039(4) 0.041(4) -0.005(3) 0.007(3) 0.000(3)
O37 0.048(4) 0.037(4) 0.047(4) -0.002(3) 0.012(3) 0.003(3)
O38 0.065(5) 0.044(4) 0.038(4) 0.007(3) 0.012(3) -0.002(4)
O39 0.054(4) 0.042(4) 0.050(4) 0.001(3) 0.014(3) -0.001(3)
 
_geom_special_details
;
 All esds (except the esd in the dihedral angle between two l.s. planes)
 are estimated using the full covariance matrix.  The cell esds are taken
 into account individually in the estimation of esds in distances, angles
 and torsion angles; correlations between esds in cell parameters are only
 used when they are defined by crystal symmetry.  An approximate (isotropic)
 treatment of cell esds is used for estimating esds involving l.s. planes.
;
 
loop_
 _geom_bond_atom_site_label_1
 _geom_bond_atom_site_label_2
 _geom_bond_distance
 _geom_bond_site_symmetry_2
 _geom_bond_publ_flag
W1 O7 1.714(6) . ?
W1 O18 1.898(6) . ?
W1 O23 1.901(6) . ?
W1 O1 1.927(6) . ?
W1 O13 1.942(5) . ?
W1 O19 2.401(6) . ?
W2 O8 1.715(6) . ?
W2 O14 1.883(6) . ?
W2 O24 1.908(6) . ?
W2 O2 1.922(6) 3_666 ?
W2 O13 1.940(6) . ?
W2 O19 2.383(5) . ?
W3 O9 1.708(6) . ?
W3 O25 1.897(6) . ?
W3 O15 1.922(6) . ?
W3 O14 1.927(6) . ?
W3 O3 1.986(6) . ?
W3 O20 2.302(5) . ?
W4 O10 1.720(6) . ?
W4 O4 1.889(6) . ?
W4 O15 1.906(6) . ?
W4 O26 1.930(6) . ?
W4 O16 1.976(6) . ?
W4 O20 2.306(6) . ?
W4 Dy1 3.4501(5) . ?
W5 O11 1.713(6) . ?
W5 O17 1.882(6) . ?
W5 O27 1.895(6) . ?
W5 O5 1.972(6) . ?
W5 O16 1.972(6) . ?
W5 O21 2.298(5) . ?
W5 Dy1 3.4620(6) . ?
W6 O12 1.710(6) . ?
W6 O6 1.879(6) . ?
W6 O18 1.920(6) . ?
W6 O17 1.930(6) . ?
W6 O28 1.980(6) . ?
W6 O21 2.340(6) . ?
W7 O32 1.716(6) . ?
W7 O28 1.880(6) . ?
W7 O31 1.920(6) . ?
W7 O23 1.926(6) . ?
W7 O29 1.973(6) . ?
W7 O22 2.295(6) . ?
W8 O33 1.711(7) . ?
W8 O29 1.906(6) . ?
W8 O24 1.916(6) . ?
W8 O30 1.918(6) . ?
W8 O25 1.947(6) . ?
W8 O22 2.311(5) . ?
W9 O34 1.710(6) . ?
W9 O26 1.896(6) . ?
W9 O30 1.915(6) . ?
W9 O31 1.919(6) . ?
W9 O27 1.923(6) . ?
W9 O22 2.388(6) . ?
Dy1 O37 2.310(7) . ?
Dy1 O35 2.318(6) . ?
Dy1 O39 2.323(8) . ?
Dy1 O36 2.334(7) . ?
Dy1 O38 2.349(7) . ?
Dy1 O5 2.364(6) . ?
Dy1 O16 2.405(6) . ?
Dy1 O4 2.416(7) . ?
Dy1 Cu2 3.3590(11) . ?
Dy1 Cu1 3.3854(11) . ?
Cu1 O1 1.956(6) 3_666 ?
Cu1 O3 1.977(6) . ?
Cu1 O4 1.982(6) . ?
Cu1 O35 1.998(6) . ?
Cu1 O20 2.251(6) . ?
Cu2 O6 1.943(6) . ?
Cu2 O2 1.948(5) . ?
Cu2 O5 1.994(6) . ?
Cu2 O35 1.996(6) . ?
Cu2 O21 2.253(6) . ?
Fe1 O2 1.992(5) . ?
Fe1 O2 1.992(5) 3_666 ?
Fe1 O1 1.999(6) . ?
Fe1 O1 2.000(6) 3_666 ?
Fe1 O19 2.102(5) . ?
Fe1 O19 2.102(5) 3_666 ?
Si1 O21 1.617(6) . ?
Si1 O20 1.625(6) . ?
Si1 O22 1.634(6) . ?
Si1 O19 1.649(6) . ?
O1 Cu1 1.956(6) 3_666 ?
O2 W2 1.922(6) 3_666 ?
O36 C2 1.248(13) . ?
O37 C4 1.255(13) . ?
O38 C7 1.247(14) . ?
O39 C9 1.270(14) . ?
C1 F1 1.311(18) . ?
C1 F2 1.318(18) . ?
C1 F3 1.328(19) . ?
C1 C2 1.542(19) . ?
C2 C3 1.384(16) . ?
C3 C4 1.395(16) . ?
C4 C5 1.503(17) . ?
C5 F6 1.321(16) . ?
C5 F5 1.323(16) . ?
C5 F4 1.342(15) . ?
C6 F7 1.270(15) . ?
C6 F9 1.322(15) . ?
C6 F8 1.368(16) . ?
C6 C7 1.537(18) . ?
C7 C8 1.356(18) . ?
C8 C9 1.390(18) . ?
C9 C10 1.523(17) . ?
C10 F12 1.265(19) . ?
C10 F10 1.312(16) . ?
C10 F11 1.318(17) . ?
N101 C101 1.517(14) . ?
N101 C121 1.521(14) . ?
N101 C111 1.524(14) . ?
N101 C131 1.542(13) . ?
C101 C102 1.521(16) . ?
C102 C103 1.526(18) . ?
C103 C104 1.56(2) . ?
C111 C112 1.517(16) . ?
C112 C113 1.542(17) . ?
C113 C114 1.530(17) . ?
C121 C122 1.522(15) . ?
C122 C123 1.547(16) . ?
C123 C124 1.551(18) . ?
C131 C132 1.517(15) . ?
C132 C133 1.587(19) . ?
C133 C134 1.53(2) . ?
N201 C221 1.511(15) . ?
N201 C201 1.537(15) . ?
N201 C211 1.544(15) . ?
N201 C231 1.555(15) . ?
C201 C202 1.530(17) . ?
C202 C203 1.555(18) . ?
C203 C204 1.55(2) . ?
C211 C212 1.515(17) . ?
C212 C213 1.558(17) . ?
C213 C214 1.529(19) . ?
C221 C222 1.535(19) . ?
C222 C223 1.53(2) . ?
C223 C224 1.54(3) . ?
C231 C232 1.525(17) . ?
C232 C233 1.506(18) . ?
C233 C234 1.533(19) . ?
N301 C301 1.515(13) . ?
N301 C331 1.522(12) . ?
N301 C311 1.522(13) . ?
N301 C321 1.541(12) . ?
C301 C302 1.520(14) . ?
C302 C303 1.550(16) . ?
C303 C304 1.516(17) . ?
C311 C312 1.536(16) . ?
C312 C313 1.548(19) . ?
C313 C314 1.57(2) . ?
C321 C322 1.490(13) . ?
C322 C323 1.528(15) . ?
C323 C324 1.551(19) . ?
C331 C332 1.517(14) . ?
C332 C333 1.538(14) . ?
C333 C334 1.525(15) . ?
C11 Cl12 1.58(3) . ?
C11 Cl11 1.89(3) . ?
C21 Cl22 1.751(18) . ?
C21 Cl21 1.790(17) . ?
C31 Cl31 1.71(2) . ?
C31 Cl32 1.983(18) . ?
Cl31 Cl32 2.36(3) . ?
 
loop_
 _geom_angle_atom_site_label_1
 _geom_angle_atom_site_label_2
 _geom_angle_atom_site_label_3
 _geom_angle
 _geom_angle_site_symmetry_1
 _geom_angle_site_symmetry_3
 _geom_angle_publ_flag
O7 W1 O18 102.9(3) . . ?
O7 W1 O23 102.4(3) . . ?
O18 W1 O23 86.9(2) . . ?
O7 W1 O1 98.4(3) . . ?
O18 W1 O1 89.0(2) . . ?
O23 W1 O1 159.2(3) . . ?
O7 W1 O13 99.0(3) . . ?
O18 W1 O13 158.0(3) . . ?
O23 W1 O13 88.3(2) . . ?
O1 W1 O13 87.9(2) . . ?
O7 W1 O19 169.2(2) . . ?
O18 W1 O19 84.6(2) . . ?
O23 W1 O19 85.5(2) . . ?
O1 W1 O19 73.8(2) . . ?
O13 W1 O19 73.7(2) . . ?
O8 W2 O14 104.1(3) . . ?
O8 W2 O24 102.0(3) . . ?
O14 W2 O24 86.2(3) . . ?
O8 W2 O2 98.0(3) . 3_666 ?
O14 W2 O2 89.9(2) . 3_666 ?
O24 W2 O2 159.9(2) . 3_666 ?
O8 W2 O13 97.9(3) . . ?
O14 W2 O13 157.8(2) . . ?
O24 W2 O13 87.6(3) . . ?
O2 W2 O13 88.6(2) 3_666 . ?
O8 W2 O19 168.9(2) . . ?
O14 W2 O19 84.2(2) . . ?
O24 W2 O19 85.5(2) . . ?
O2 W2 O19 74.4(2) 3_666 . ?
O13 W2 O19 74.1(2) . . ?
O9 W3 O25 101.4(3) . . ?
O9 W3 O15 99.1(3) . . ?
O25 W3 O15 92.4(3) . . ?
O9 W3 O14 101.2(3) . . ?
O25 W3 O14 86.6(3) . . ?
O15 W3 O14 159.4(2) . . ?
O9 W3 O3 98.4(3) . . ?
O25 W3 O3 159.9(2) . . ?
O15 W3 O3 87.2(3) . . ?
O14 W3 O3 86.9(3) . . ?
O9 W3 O20 171.4(3) . . ?
O25 W3 O20 84.0(2) . . ?
O15 W3 O20 73.8(2) . . ?
O14 W3 O20 85.7(2) . . ?
O3 W3 O20 76.7(2) . . ?
O10 W4 O4 102.3(3) . . ?
O10 W4 O15 99.0(3) . . ?
O4 W4 O15 94.0(3) . . ?
O10 W4 O26 99.4(3) . . ?
O4 W4 O26 156.7(3) . . ?
O15 W4 O26 90.8(3) . . ?
O10 W4 O16 99.8(3) . . ?
O4 W4 O16 83.0(3) . . ?
O15 W4 O16 161.2(3) . . ?
O26 W4 O16 85.0(2) . . ?
O10 W4 O20 173.0(3) . . ?
O4 W4 O20 78.0(2) . . ?
O15 W4 O20 74.0(2) . . ?
O26 W4 O20 81.5(2) . . ?
O16 W4 O20 87.2(2) . . ?
O10 W4 Dy1 94.8(2) . . ?
O4 W4 Dy1 42.3(2) . . ?
O15 W4 Dy1 136.23(18) . . ?
O26 W4 Dy1 127.53(17) . . ?
O16 W4 Dy1 42.68(17) . . ?
O20 W4 Dy1 90.09(14) . . ?
O11 W5 O17 99.6(3) . . ?
O11 W5 O27 100.7(3) . . ?
O17 W5 O27 93.6(3) . . ?
O11 W5 O5 99.4(3) . . ?
O17 W5 O5 91.0(3) . . ?
O27 W5 O5 158.4(2) . . ?
O11 W5 O16 99.4(3) . . ?
O17 W5 O16 160.5(2) . . ?
O27 W5 O16 87.2(3) . . ?
O5 W5 O16 81.6(2) . . ?
O11 W5 O21 172.6(3) . . ?
O17 W5 O21 74.4(2) . . ?
O27 W5 O21 84.2(2) . . ?
O5 W5 O21 76.8(2) . . ?
O16 W5 O21 86.3(2) . . ?
O11 W5 Dy1 92.8(2) . . ?
O17 W5 Dy1 132.00(19) . . ?
O27 W5 Dy1 129.43(19) . . ?
O5 W5 Dy1 41.13(18) . . ?
O16 W5 Dy1 42.36(17) . . ?
O21 W5 Dy1 88.31(15) . . ?
O12 W6 O6 101.7(3) . . ?
O12 W6 O18 100.8(3) . . ?
O6 W6 O18 90.8(2) . . ?
O12 W6 O17 100.2(3) . . ?
O6 W6 O17 90.0(3) . . ?
O18 W6 O17 158.5(2) . . ?
O12 W6 O28 99.1(3) . . ?
O6 W6 O28 159.2(2) . . ?
O18 W6 O28 84.5(2) . . ?
O17 W6 O28 87.2(3) . . ?
O12 W6 O21 172.8(3) . . ?
O6 W6 O21 78.6(2) . . ?
O18 W6 O21 86.5(2) . . ?
O17 W6 O21 72.6(2) . . ?
O28 W6 O21 80.9(2) . . ?
O32 W7 O28 102.0(3) . . ?
O32 W7 O31 99.4(3) . . ?
O28 W7 O31 91.8(3) . . ?
O32 W7 O23 103.0(3) . . ?
O28 W7 O23 86.5(3) . . ?
O31 W7 O23 157.4(3) . . ?
O32 W7 O29 98.4(3) . . ?
O28 W7 O29 159.5(3) . . ?
O31 W7 O29 87.2(2) . . ?
O23 W7 O29 86.6(2) . . ?
O32 W7 O22 169.3(3) . . ?
O28 W7 O22 87.1(2) . . ?
O31 W7 O22 74.4(2) . . ?
O23 W7 O22 83.0(2) . . ?
O29 W7 O22 72.9(2) . . ?
O33 W8 O29 99.2(3) . . ?
O33 W8 O24 102.7(3) . . ?
O29 W8 O24 90.7(3) . . ?
O33 W8 O30 99.6(3) . . ?
O29 W8 O30 89.6(3) . . ?
O24 W8 O30 157.4(2) . . ?
O33 W8 O25 102.1(3) . . ?
O29 W8 O25 158.7(2) . . ?
O24 W8 O25 83.7(3) . . ?
O30 W8 O25 87.9(3) . . ?
O33 W8 O22 170.8(3) . . ?
O29 W8 O22 73.6(2) . . ?
O24 W8 O22 83.5(2) . . ?
O30 W8 O22 74.9(2) . . ?
O25 W8 O22 85.3(2) . . ?
O34 W9 O26 102.1(3) . . ?
O34 W9 O30 99.6(3) . . ?
O26 W9 O30 91.0(3) . . ?
O34 W9 O31 100.9(3) . . ?
O26 W9 O31 156.9(3) . . ?
O30 W9 O31 87.8(3) . . ?
O34 W9 O27 102.3(3) . . ?
O26 W9 O27 85.1(3) . . ?
O30 W9 O27 158.1(2) . . ?
O31 W9 O27 87.5(3) . . ?
O34 W9 O22 169.9(3) . . ?
O26 W9 O22 85.3(2) . . ?
O30 W9 O22 73.1(2) . . ?
O31 W9 O22 72.2(2) . . ?
O27 W9 O22 85.1(2) . . ?
O37 Dy1 O35 80.8(2) . . ?
O37 Dy1 O39 77.4(3) . . ?
O35 Dy1 O39 143.6(3) . . ?
O37 Dy1 O36 72.8(3) . . ?
O35 Dy1 O36 83.9(2) . . ?
O39 Dy1 O36 116.3(3) . . ?
O37 Dy1 O38 116.9(3) . . ?
O35 Dy1 O38 143.7(3) . . ?
O39 Dy1 O38 72.6(3) . . ?
O36 Dy1 O38 73.1(3) . . ?
O37 Dy1 O5 140.2(2) . . ?
O35 Dy1 O5 71.2(2) . . ?
O39 Dy1 O5 140.2(2) . . ?
O36 Dy1 O5 76.6(3) . . ?
O38 Dy1 O5 76.3(2) . . ?
O37 Dy1 O16 145.7(2) . . ?
O35 Dy1 O16 93.2(2) . . ?
O39 Dy1 O16 88.8(2) . . ?
O36 Dy1 O16 140.6(3) . . ?
O38 Dy1 O16 87.7(2) . . ?
O5 Dy1 O16 65.4(2) . . ?
O37 Dy1 O4 82.1(2) . . ?
O35 Dy1 O4 70.3(2) . . ?
O39 Dy1 O4 78.1(2) . . ?
O36 Dy1 O4 146.5(2) . . ?
O38 Dy1 O4 139.6(2) . . ?
O5 Dy1 O4 112.8(2) . . ?
O16 Dy1 O4 64.2(2) . . ?
O37 Dy1 Cu2 111.53(19) . . ?
O35 Dy1 Cu2 35.53(15) . . ?
O39 Dy1 Cu2 166.09(19) . . ?
O36 Dy1 Cu2 77.2(2) . . ?
O38 Dy1 Cu2 110.4(2) . . ?
O5 Dy1 Cu2 35.70(14) . . ?
O16 Dy1 Cu2 77.94(15) . . ?
O4 Dy1 Cu2 92.33(15) . . ?
O37 Dy1 Cu1 79.03(19) . . ?
O35 Dy1 Cu1 35.09(14) . . ?
O39 Dy1 Cu1 111.3(2) . . ?
O36 Dy1 Cu1 116.18(19) . . ?
O38 Dy1 Cu1 163.99(19) . . ?
O5 Dy1 Cu1 92.67(14) . . ?
O16 Dy1 Cu1 77.05(14) . . ?
O4 Dy1 Cu1 35.18(14) . . ?
Cu2 Dy1 Cu1 62.02(2) . . ?
O37 Dy1 W4 111.81(19) . . ?
O35 Dy1 W4 86.61(14) . . ?
O39 Dy1 W4 75.06(19) . . ?
O36 Dy1 W4 168.7(2) . . ?
O38 Dy1 W4 112.0(2) . . ?
O5 Dy1 W4 94.51(14) . . ?
O16 Dy1 W4 33.85(14) . . ?
O4 Dy1 W4 31.78(15) . . ?
Cu2 Dy1 W4 91.46(2) . . ?
Cu1 Dy1 W4 56.545(19) . . ?
O37 Dy1 W5 168.31(18) . . ?
O35 Dy1 W5 87.52(15) . . ?
O39 Dy1 W5 112.2(2) . . ?
O36 Dy1 W5 107.1(2) . . ?
O38 Dy1 W5 73.50(19) . . ?
O5 Dy1 W5 33.27(14) . . ?
O16 Dy1 W5 33.54(15) . . ?
O4 Dy1 W5 93.15(15) . . ?
Cu2 Dy1 W5 57.79(2) . . ?
Cu1 Dy1 W5 90.90(2) . . ?
W4 Dy1 W5 66.212(11) . . ?
O1 Cu1 O3 90.1(2) 3_666 . ?
O1 Cu1 O4 176.9(3) 3_666 . ?
O3 Cu1 O4 93.0(3) . . ?
O1 Cu1 O35 90.5(2) 3_666 . ?
O3 Cu1 O35 176.8(3) . . ?
O4 Cu1 O35 86.4(3) . . ?
O1 Cu1 O20 103.5(2) 3_666 . ?
O3 Cu1 O20 78.1(2) . . ?
O4 Cu1 O20 77.5(2) . . ?
O35 Cu1 O20 104.8(2) . . ?
O1 Cu1 Dy1 132.30(16) 3_666 . ?
O3 Cu1 Dy1 137.44(18) . . ?
O4 Cu1 Dy1 44.61(19) . . ?
O35 Cu1 Dy1 41.83(17) . . ?
O20 Cu1 Dy1 92.69(14) . . ?
O6 Cu2 O2 90.8(2) . . ?
O6 Cu2 O5 92.8(3) . . ?
O2 Cu2 O5 176.4(3) . . ?
O6 Cu2 O35 176.7(2) . . ?
O2 Cu2 O35 90.2(2) . . ?
O5 Cu2 O35 86.2(2) . . ?
O6 Cu2 O21 79.6(2) . . ?
O2 Cu2 O21 102.9(2) . . ?
O5 Cu2 O21 77.4(2) . . ?
O35 Cu2 O21 103.3(2) . . ?
O6 Cu2 Dy1 136.36(18) . . ?
O2 Cu2 Dy1 132.68(18) . . ?
O5 Cu2 Dy1 43.79(18) . . ?
O35 Cu2 Dy1 42.45(16) . . ?
O21 Cu2 Dy1 91.65(15) . . ?
O2 Fe1 O2 180.0 . 3_666 ?
O2 Fe1 O1 92.0(2) . . ?
O2 Fe1 O1 88.0(2) 3_666 . ?
O2 Fe1 O1 88.0(2) . 3_666 ?
O2 Fe1 O1 92.0(2) 3_666 3_666 ?
O1 Fe1 O1 180.0(3) . 3_666 ?
O2 Fe1 O19 100.1(2) . . ?
O2 Fe1 O19 79.9(2) 3_666 . ?
O1 Fe1 O19 79.6(2) . . ?
O1 Fe1 O19 100.4(2) 3_666 . ?
O2 Fe1 O19 79.9(2) . 3_666 ?
O2 Fe1 O19 100.1(2) 3_666 3_666 ?
O1 Fe1 O19 100.4(2) . 3_666 ?
O1 Fe1 O19 79.6(2) 3_666 3_666 ?
O19 Fe1 O19 180.0 . 3_666 ?
O21 Si1 O20 111.5(3) . . ?
O21 Si1 O22 108.2(3) . . ?
O20 Si1 O22 108.3(3) . . ?
O21 Si1 O19 109.3(3) . . ?
O20 Si1 O19 108.6(3) . . ?
O22 Si1 O19 111.0(3) . . ?
W1 O1 Cu1 114.8(3) . 3_666 ?
W1 O1 Fe1 113.3(3) . . ?
Cu1 O1 Fe1 124.6(3) 3_666 . ?
W2 O2 Cu2 114.1(3) 3_666 . ?
W2 O2 Fe1 112.7(3) 3_666 . ?
Cu2 O2 Fe1 125.9(3) . . ?
Cu1 O3 W3 112.6(3) . . ?
W4 O4 Cu1 113.5(3) . . ?
W4 O4 Dy1 105.9(3) . . ?
Cu1 O4 Dy1 100.2(3) . . ?
W5 O5 Cu2 112.5(3) . . ?
W5 O5 Dy1 105.6(3) . . ?
Cu2 O5 Dy1 100.5(2) . . ?
W6 O6 Cu2 113.6(3) . . ?
W2 O13 W1 121.9(3) . . ?
W2 O14 W3 150.2(3) . . ?
W4 O15 W3 120.1(3) . . ?
W5 O16 W4 145.9(3) . . ?
W5 O16 Dy1 104.1(2) . . ?
W4 O16 Dy1 103.5(3) . . ?
W5 O17 W6 121.4(3) . . ?
W1 O18 W6 151.8(3) . . ?
Si1 O19 Fe1 127.9(3) . . ?
Si1 O19 W2 121.7(3) . . ?
Fe1 O19 W2 93.0(2) . . ?
Si1 O19 W1 121.1(3) . . ?
Fe1 O19 W1 93.3(2) . . ?
W2 O19 W1 90.37(19) . . ?
Si1 O20 Cu1 118.0(3) . . ?
Si1 O20 W3 126.2(3) . . ?
Cu1 O20 W3 92.7(2) . . ?
Si1 O20 W4 127.3(3) . . ?
Cu1 O20 W4 90.6(2) . . ?
W3 O20 W4 92.1(2) . . ?
Si1 O21 Cu2 119.4(3) . . ?
Si1 O21 W5 127.2(3) . . ?
Cu2 O21 W5 92.9(2) . . ?
Si1 O21 W6 126.8(3) . . ?
Cu2 O21 W6 88.22(19) . . ?
W5 O21 W6 91.56(19) . . ?
Si1 O22 W7 124.9(3) . . ?
Si1 O22 W8 125.8(3) . . ?
W7 O22 W8 93.6(2) . . ?
Si1 O22 W9 120.8(3) . . ?
W7 O22 W9 91.50(19) . . ?
W8 O22 W9 90.65(19) . . ?
W1 O23 W7 150.7(3) . . ?
W2 O24 W8 153.5(4) . . ?
W3 O25 W8 151.2(3) . . ?
W9 O26 W4 154.6(3) . . ?
W5 O27 W9 151.6(4) . . ?
W7 O28 W6 151.1(3) . . ?
W8 O29 W7 119.8(3) . . ?
W9 O30 W8 121.3(3) . . ?
W9 O31 W7 121.9(3) . . ?
Cu2 O35 Cu1 120.9(3) . . ?
Cu2 O35 Dy1 102.0(2) . . ?
Cu1 O35 Dy1 103.1(2) . . ?
C2 O36 Dy1 134.5(8) . . ?
C4 O37 Dy1 135.9(7) . . ?
C7 O38 Dy1 133.1(8) . . ?
C9 O39 Dy1 131.4(8) . . ?
F1 C1 F2 106.2(14) . . ?
F1 C1 F3 107.7(14) . . ?
F2 C1 F3 106.6(14) . . ?
F1 C1 C2 112.1(13) . . ?
F2 C1 C2 113.8(13) . . ?
F3 C1 C2 110.1(13) . . ?
O36 C2 C3 128.5(11) . . ?
O36 C2 C1 112.7(11) . . ?
C3 C2 C1 118.8(11) . . ?
C2 C3 C4 119.9(11) . . ?
O37 C4 C3 127.6(11) . . ?
O37 C4 C5 114.0(10) . . ?
C3 C4 C5 118.4(11) . . ?
F6 C5 F5 104.9(11) . . ?
F6 C5 F4 105.5(12) . . ?
F5 C5 F4 107.5(11) . . ?
F6 C5 C4 115.1(11) . . ?
F5 C5 C4 110.9(11) . . ?
F4 C5 C4 112.4(11) . . ?
F7 C6 F9 108.4(11) . . ?
F7 C6 F8 107.5(11) . . ?
F9 C6 F8 105.8(11) . . ?
F7 C6 C7 115.6(11) . . ?
F9 C6 C7 109.4(11) . . ?
F8 C6 C7 109.7(11) . . ?
O38 C7 C8 126.9(12) . . ?
O38 C7 C6 115.4(11) . . ?
C8 C7 C6 117.6(12) . . ?
C7 C8 C9 121.5(13) . . ?
O39 C9 C8 128.2(12) . . ?
O39 C9 C10 115.3(11) . . ?
C8 C9 C10 116.5(12) . . ?
F12 C10 F10 105.5(13) . . ?
F12 C10 F11 107.2(13) . . ?
F10 C10 F11 104.3(12) . . ?
F12 C10 C9 114.4(13) . . ?
F10 C10 C9 113.4(11) . . ?
F11 C10 C9 111.3(11) . . ?
C101 N101 C121 111.3(8) . . ?
C101 N101 C111 107.5(8) . . ?
C121 N101 C111 112.0(8) . . ?
C101 N101 C131 110.5(8) . . ?
C121 N101 C131 105.7(8) . . ?
C111 N101 C131 109.8(8) . . ?
N101 C101 C102 114.9(9) . . ?
C101 C102 C103 108.5(10) . . ?
C102 C103 C104 111.2(12) . . ?
C112 C111 N101 114.7(9) . . ?
C111 C112 C113 109.8(10) . . ?
C114 C113 C112 111.5(10) . . ?
N101 C121 C122 117.0(9) . . ?
C121 C122 C123 108.6(9) . . ?
C122 C123 C124 111.5(10) . . ?
C132 C131 N101 116.4(9) . . ?
C131 C132 C133 106.4(10) . . ?
C134 C133 C132 109.4(13) . . ?
C221 N201 C201 106.2(9) . . ?
C221 N201 C211 112.0(8) . . ?
C201 N201 C211 111.5(9) . . ?
C221 N201 C231 111.4(9) . . ?
C201 N201 C231 109.7(8) . . ?
C211 N201 C231 106.2(8) . . ?
C202 C201 N201 114.5(10) . . ?
C201 C202 C203 108.6(10) . . ?
C204 C203 C202 110.2(11) . . ?
C212 C211 N201 113.7(9) . . ?
C211 C212 C213 108.3(10) . . ?
C214 C213 C212 111.6(10) . . ?
N201 C221 C222 115.1(10) . . ?
C223 C222 C221 112.5(12) . . ?
C222 C223 C224 115.9(15) . . ?
C232 C231 N201 114.2(9) . . ?
C233 C232 C231 108.7(10) . . ?
C232 C233 C234 113.0(11) . . ?
C301 N301 C331 107.9(7) . . ?
C301 N301 C311 111.1(7) . . ?
C331 N301 C311 111.3(7) . . ?
C301 N301 C321 110.4(7) . . ?
C331 N301 C321 110.2(7) . . ?
C311 N301 C321 105.9(7) . . ?
N301 C301 C302 115.4(8) . . ?
C301 C302 C303 110.1(9) . . ?
C304 C303 C302 113.4(10) . . ?
N301 C311 C312 114.8(9) . . ?
C311 C312 C313 108.0(10) . . ?
C312 C313 C314 108.6(12) . . ?
C322 C321 N301 115.1(8) . . ?
C321 C322 C323 108.4(9) . . ?
C322 C323 C324 111.6(10) . . ?
C332 C331 N301 116.2(8) . . ?
C331 C332 C333 109.5(8) . . ?
C334 C333 C332 111.2(9) . . ?
Cl12 C11 Cl11 109.6(15) . . ?
Cl22 C21 Cl21 110.2(9) . . ?
Cl31 C31 Cl32 79.2(12) . . ?
C31 Cl31 Cl32 55.5(8) . . ?
C31 Cl32 Cl31 45.3(8) . . ?
 
loop_
 _geom_torsion_atom_site_label_1
 _geom_torsion_atom_site_label_2
 _geom_torsion_atom_site_label_3
 _geom_torsion_atom_site_label_4
 _geom_torsion
 _geom_torsion_site_symmetry_1
 _geom_torsion_site_symmetry_2
 _geom_torsion_site_symmetry_3
 _geom_torsion_site_symmetry_4
 _geom_torsion_publ_flag
O10 W4 O4 Cu1 167.5(3) . . . . ?
O15 W4 O4 Cu1 67.4(4) . . . . ?
O26 W4 O4 Cu1 -34.1(8) . . . . ?
O16 W4 O4 Cu1 -93.9(4) . . . . ?
O20 W4 O4 Cu1 -5.3(3) . . . . ?
Dy1 W4 O4 Cu1 -109.0(4) . . . . ?
O10 W4 O4 Dy1 -83.5(3) . . . . ?
O15 W4 O4 Dy1 176.3(3) . . . . ?
O26 W4 O4 Dy1 74.9(7) . . . . ?
O16 W4 O4 Dy1 15.0(3) . . . . ?
O20 W4 O4 Dy1 103.7(3) . . . . ?
O12 W6 O6 Cu2 173.8(3) . . . . ?
O18 W6 O6 Cu2 -85.0(3) . . . . ?
O17 W6 O6 Cu2 73.4(3) . . . . ?
O28 W6 O6 Cu2 -8.4(9) . . . . ?
O21 W6 O6 Cu2 1.2(3) . . . . ?
O8 W2 O14 W3 -127.4(6) . . . . ?
O24 W2 O14 W3 -26.0(7) . . . . ?
O2 W2 O14 W3 134.3(7) 3_666 . . . ?
O13 W2 O14 W3 48.2(11) . . . . ?
O19 W2 O14 W3 59.9(6) . . . . ?
O11 W5 O17 W6 173.1(4) . . . . ?
O27 W5 O17 W6 -85.4(4) . . . . ?
O5 W5 O17 W6 73.5(4) . . . . ?
O16 W5 O17 W6 6.4(10) . . . . ?
O21 W5 O17 W6 -2.5(3) . . . . ?
Dy1 W5 O17 W6 70.5(4) . . . . ?
O7 W1 O18 W6 132.0(7) . . . . ?
O23 W1 O18 W6 30.1(7) . . . . ?
O1 W1 O18 W6 -129.6(7) . . . . ?
O13 W1 O18 W6 -47.7(11) . . . . ?
O19 W1 O18 W6 -55.7(7) . . . . ?
O21 Si1 O19 Fe1 60.2(5) . . . . ?
O20 Si1 O19 Fe1 -61.7(4) . . . . ?
O22 Si1 O19 Fe1 179.4(3) . . . . ?
O21 Si1 O19 W2 -175.9(3) . . . . ?
O20 Si1 O19 W2 62.3(4) . . . . ?
O22 Si1 O19 W2 -56.6(4) . . . . ?
O21 Si1 O19 W1 -63.5(4) . . . . ?
O20 Si1 O19 W1 174.7(3) . . . . ?
O22 Si1 O19 W1 55.8(4) . . . . ?
O21 Si1 O20 Cu1 -62.5(4) . . . . ?
O22 Si1 O20 Cu1 178.6(3) . . . . ?
O19 Si1 O20 Cu1 58.0(4) . . . . ?
O21 Si1 O20 W3 -179.7(3) . . . . ?
O22 Si1 O20 W3 61.4(4) . . . . ?
O19 Si1 O20 W3 -59.2(4) . . . . ?
O21 Si1 O20 W4 52.3(5) . . . . ?
O22 Si1 O20 W4 -66.6(4) . . . . ?
O19 Si1 O20 W4 172.8(3) . . . . ?
O20 Si1 O21 Cu2 64.3(4) . . . . ?
O22 Si1 O21 Cu2 -176.7(3) . . . . ?
O19 Si1 O21 Cu2 -55.8(4) . . . . ?
O20 Si1 O21 W5 -55.7(5) . . . . ?
O22 Si1 O21 W5 63.3(5) . . . . ?
O19 Si1 O21 W5 -175.8(3) . . . . ?
O20 Si1 O21 W6 176.5(3) . . . . ?
O22 Si1 O21 W6 -64.5(4) . . . . ?
O19 Si1 O21 W6 56.5(4) . . . . ?
O21 Si1 O22 W7 55.3(4) . . . . ?
O20 Si1 O22 W7 176.3(3) . . . . ?
O19 Si1 O22 W7 -64.6(4) . . . . ?
O21 Si1 O22 W8 -178.2(3) . . . . ?
O20 Si1 O22 W8 -57.2(4) . . . . ?
O19 Si1 O22 W8 62.0(4) . . . . ?
O21 Si1 O22 W9 -61.7(4) . . . . ?
O20 Si1 O22 W9 59.3(4) . . . . ?
O19 Si1 O22 W9 178.4(3) . . . . ?
O9 W3 O25 W8 -131.6(7) . . . . ?
O15 W3 O25 W8 128.6(7) . . . . ?
O14 W3 O25 W8 -30.8(7) . . . . ?
O3 W3 O25 W8 40.2(12) . . . . ?
O20 W3 O25 W8 55.2(7) . . . . ?
O34 W9 O26 W4 -130.9(8) . . . . ?
O30 W9 O26 W4 129.0(8) . . . . ?
O31 W9 O26 W4 42.3(12) . . . . ?
O27 W9 O26 W4 -29.4(8) . . . . ?
O22 W9 O26 W4 56.1(8) . . . . ?
O11 W5 O27 W9 -131.1(8) . . . . ?
O17 W5 O27 W9 128.5(8) . . . . ?
O5 W5 O27 W9 26.7(13) . . . . ?
O16 W5 O27 W9 -32.0(8) . . . . ?
O21 W5 O27 W9 54.6(7) . . . . ?
Dy1 W5 O27 W9 -28.4(9) . . . . ?
O32 W7 O28 W6 -130.7(7) . . . . ?
O31 W7 O28 W6 129.2(8) . . . . ?
O23 W7 O28 W6 -28.2(7) . . . . ?
O29 W7 O28 W6 42.5(13) . . . . ?
O22 W7 O28 W6 55.0(7) . . . . ?
Dy1 O36 C2 C3 12.0(19) . . . . ?
Dy1 O36 C2 C1 -169.6(8) . . . . ?
F1 C1 C2 O36 -64.6(16) . . . . ?
F2 C1 C2 O36 174.8(12) . . . . ?
F3 C1 C2 O36 55.2(16) . . . . ?
F1 C1 C2 C3 113.9(14) . . . . ?
F2 C1 C2 C3 -6.6(19) . . . . ?
F3 C1 C2 C3 -126.2(14) . . . . ?
O36 C2 C3 C4 -5(2) . . . . ?
C1 C2 C3 C4 176.6(12) . . . . ?
Dy1 O37 C4 C3 -4.8(19) . . . . ?
Dy1 O37 C4 C5 172.5(8) . . . . ?
C2 C3 C4 O37 1.5(19) . . . . ?
C2 C3 C4 C5 -175.8(11) . . . . ?
O37 C4 C5 F6 -169.7(11) . . . . ?
C3 C4 C5 F6 8.0(17) . . . . ?
O37 C4 C5 F5 -50.8(14) . . . . ?
C3 C4 C5 F5 126.8(12) . . . . ?
O37 C4 C5 F4 69.5(14) . . . . ?
C3 C4 C5 F4 -112.8(13) . . . . ?
Dy1 O38 C7 C8 15(2) . . . . ?
Dy1 O38 C7 C6 -166.7(8) . . . . ?
F7 C6 C7 O38 10.4(17) . . . . ?
F9 C6 C7 O38 -112.3(12) . . . . ?
F8 C6 C7 O38 132.1(11) . . . . ?
F7 C6 C7 C8 -171.5(12) . . . . ?
F9 C6 C7 C8 65.8(16) . . . . ?
F8 C6 C7 C8 -49.8(16) . . . . ?
O38 C7 C8 C9 8(2) . . . . ?
C6 C7 C8 C9 -170.2(12) . . . . ?
Dy1 O39 C9 C8 -15.4(19) . . . . ?
Dy1 O39 C9 C10 167.7(7) . . . . ?
C7 C8 C9 O39 -8(2) . . . . ?
C7 C8 C9 C10 169.2(12) . . . . ?
O39 C9 C10 F12 6.5(18) . . . . ?
C8 C9 C10 F12 -170.7(14) . . . . ?
O39 C9 C10 F10 -114.5(13) . . . . ?
C8 C9 C10 F10 68.2(15) . . . . ?
O39 C9 C10 F11 128.2(12) . . . . ?
C8 C9 C10 F11 -49.0(16) . . . . ?
C121 N101 C101 C102 55.1(12) . . . . ?
C111 N101 C101 C102 178.1(9) . . . . ?
C131 N101 C101 C102 -62.0(11) . . . . ?
N101 C101 C102 C103 171.8(9) . . . . ?
C101 C102 C103 C104 -177.9(11) . . . . ?
C101 N101 C111 C112 175.9(9) . . . . ?
C121 N101 C111 C112 -61.5(12) . . . . ?
C131 N101 C111 C112 55.6(11) . . . . ?
N101 C111 C112 C113 -175.7(9) . . . . ?
C111 C112 C113 C114 174.8(10) . . . . ?
C101 N101 C121 C122 59.7(12) . . . . ?
C111 N101 C121 C122 -60.7(12) . . . . ?
C131 N101 C121 C122 179.7(9) . . . . ?
N101 C121 C122 C123 -172.8(9) . . . . ?
C121 C122 C123 C124 77.2(12) . . . . ?
C101 N101 C131 C132 -61.5(11) . . . . ?
C121 N101 C131 C132 177.9(9) . . . . ?
C111 N101 C131 C132 57.0(11) . . . . ?
N101 C131 C132 C133 173.5(9) . . . . ?
C131 C132 C133 C134 178.0(12) . . . . ?
C221 N201 C201 C202 -175.9(10) . . . . ?
C211 N201 C201 C202 61.9(12) . . . . ?
C231 N201 C201 C202 -55.4(12) . . . . ?
N201 C201 C202 C203 -177.3(10) . . . . ?
C201 C202 C203 C204 -172.2(11) . . . . ?
C221 N201 C211 C212 -65.6(12) . . . . ?
C201 N201 C211 C212 53.2(12) . . . . ?
C231 N201 C211 C212 172.6(9) . . . . ?
N201 C211 C212 C213 -179.4(9) . . . . ?
C211 C212 C213 C214 173.6(10) . . . . ?
C201 N201 C221 C222 -179.5(10) . . . . ?
C211 N201 C221 C222 -57.6(13) . . . . ?
C231 N201 C221 C222 61.2(13) . . . . ?
N201 C221 C222 C223 -177.0(11) . . . . ?
C221 C222 C223 C224 68.9(19) . . . . ?
C221 N201 C231 C232 57.9(12) . . . . ?
C201 N201 C231 C232 -59.4(12) . . . . ?
C211 N201 C231 C232 -179.9(9) . . . . ?
N201 C231 C232 C233 177.5(10) . . . . ?
C231 C232 C233 C234 -177.9(11) . . . . ?
C331 N301 C301 C302 179.7(8) . . . . ?
C311 N301 C301 C302 57.4(11) . . . . ?
C321 N301 C301 C302 -59.8(10) . . . . ?
N301 C301 C302 C303 170.1(8) . . . . ?
C301 C302 C303 C304 175.6(10) . . . . ?
C301 N301 C311 C312 62.0(11) . . . . ?
C331 N301 C311 C312 -58.3(11) . . . . ?
C321 N301 C311 C312 -178.1(8) . . . . ?
N301 C311 C312 C313 -179.4(9) . . . . ?
C311 C312 C313 C314 -175.8(11) . . . . ?
C301 N301 C321 C322 -51.1(10) . . . . ?
C331 N301 C321 C322 68.0(10) . . . . ?
C311 N301 C321 C322 -171.4(8) . . . . ?
N301 C321 C322 C323 -176.4(8) . . . . ?
C321 C322 C323 C324 175.8(9) . . . . ?
C301 N301 C331 C332 -169.4(8) . . . . ?
C311 N301 C331 C332 -47.2(11) . . . . ?
C321 N301 C331 C332 70.0(10) . . . . ?
N301 C331 C332 C333 -173.8(8) . . . . ?
C331 C332 C333 C334 -169.2(8) . . . . ?
 
_refine_diff_density_max    5.145
_refine_diff_density_min   -4.525
_refine_diff_density_rms    0.277

_shelxl_version_number 2013-3

_shelx_res_file
;
TITL Template texray.inf
CELL  0.71069  19.7403  20.1328  26.5264   90.000  100.6942   90.000
ZERR     2.00   0.0001   0.0002   0.0002    0.000    0.0004    0.000
LATT   1
SYMM  1/2 - X, 1/2 + Y, 1/2 - Z
SFAC  W    DY   CU   FE   SI   F    O    N    C    CL
UNIT  36   4    8    2    4    48   160  12   244  24
MERG   2
SHEL 99999.000000 0.000000
DFIX     1.900   0.020 C31 CL32
SIMU     0.040   0.080   1.700 C31 CL31 CL32
FMAP   2
PLAN   20
SIZE     0.020   0.100   0.100
ACTA
BOND   $H
CONF
LIST   4
WPDB  -2
L.S.  10
OMIT     1   1   1
OMIT     0   1   2
OMIT     1   0   3

TEMP  -160.00
WGHT    0.073100  174.615601
FVAR       0.29012
W1    1    0.373957    0.569976    0.545603    11.00000    0.02691    0.02129 =
         0.02623    0.00114   -0.00030    0.00114
W2    1    0.540673    0.585465    0.605590    11.00000    0.03239    0.02006 =
         0.02330    0.00049   -0.00582   -0.00035
W3    1    0.661564    0.683240    0.545134    11.00000    0.03025    0.03090 =
         0.03304    0.00495   -0.00746   -0.00610
W4    1    0.611697    0.751678    0.430483    11.00000    0.03051    0.02055 =
         0.03075    0.00167    0.00081   -0.00174
W5    1    0.425540    0.736292    0.364913    11.00000    0.03422    0.02572 =
         0.02541    0.00510   -0.00365    0.00026
W6    1    0.316977    0.644037    0.416967    11.00000    0.02716    0.03231 =
         0.03027    0.00689   -0.00523    0.00141
W7    1    0.358090    0.752765    0.532825    11.00000    0.03093    0.02091 =
         0.03785   -0.00092    0.00492    0.00316
W8    1    0.521146    0.769153    0.595836    11.00000    0.03975    0.01977 =
         0.02559   -0.00158   -0.00645   -0.00081
W9    1    0.472490    0.840559    0.481095    11.00000    0.03350    0.01883 =
         0.02880    0.00175   -0.00064    0.00195
DY1   2    0.559315    0.654939    0.322958    11.00000    0.04197    0.02880 =
         0.03301    0.00130    0.00573   -0.00051
CU1   3    0.615094    0.591478    0.441587    11.00000    0.03131    0.02155 =
         0.02867   -0.00050    0.00034   -0.00096
CU2   3    0.444719    0.574356    0.379743    11.00000    0.03212    0.02253 =
         0.02443    0.00076   -0.00244    0.00075
FE1   4    0.500000    0.500000    0.500000    10.50000    0.02668    0.01839 =
         0.02269    0.00015   -0.00256    0.00075
SI1   5    0.487487    0.666511    0.486387    11.00000    0.02525    0.01661 =
         0.02180    0.00054   -0.00125    0.00106
O1    7    0.410679    0.488181    0.524199    11.00000    0.02613    0.02274 =
         0.02973   -0.00139   -0.00190    0.00170
O2    7    0.453097    0.499190    0.426716    11.00000    0.03037    0.02191 =
         0.02374    0.00253   -0.00508   -0.00244
O3    7    0.687940    0.610945    0.501633    11.00000    0.02910    0.01979 =
         0.04048    0.00172   -0.00119    0.00327
O4    7    0.637686    0.670696    0.403541    11.00000    0.04160    0.02154 =
         0.03719    0.00251    0.00800   -0.00098
O5    7    0.442571    0.651440    0.332300    11.00000    0.03548    0.02221 =
         0.02916    0.00341   -0.00033    0.00132
O6    7    0.345606    0.576842    0.376444    11.00000    0.03400    0.02236 =
         0.02714   -0.00170   -0.00702    0.00079
O7    7    0.306530    0.537458    0.569978    11.00000    0.03307    0.02931 =
         0.03405    0.00370    0.00251    0.00150
O8    7    0.574770    0.562438    0.667329    11.00000    0.03998    0.02575 =
         0.03083   -0.00253   -0.00616   -0.00451
O9    7    0.738498    0.691440    0.586488    11.00000    0.03883    0.02328 =
         0.03811    0.00118   -0.00097   -0.00270
O10   7    0.653601    0.809325    0.399540    11.00000    0.04212    0.02282 =
         0.03906   -0.00214    0.00677   -0.00161
O11   7    0.408977    0.785746    0.311496    11.00000    0.04180    0.02447 =
         0.03544    0.00220   -0.00219   -0.00012
O12   7    0.229220    0.638408    0.400298    11.00000    0.03681    0.02877 =
         0.03295    0.00160   -0.00516    0.00074
O13   7    0.444740    0.566315    0.607096    11.00000    0.03678    0.02307 =
         0.02036   -0.00128   -0.00243    0.00101
O14   7    0.617243    0.615723    0.579056    11.00000    0.03332    0.01437 =
         0.03264    0.00198   -0.00352   -0.00061
O15   7    0.677373    0.744123    0.492704    11.00000    0.03322    0.02191 =
         0.03632    0.00148   -0.00013   -0.00248
O16   7    0.527178    0.739226    0.378312    11.00000    0.03736    0.01994 =
         0.02996   -0.00142   -0.00043    0.00248
O17   7    0.335053    0.709893    0.368284    11.00000    0.03027    0.02837 =
         0.02766    0.00246   -0.00193    0.00233
O18   7    0.333937    0.587293    0.476139    11.00000    0.03035    0.02288 =
         0.02836    0.00268   -0.00276    0.00224
O19   7    0.480485    0.598395    0.519582    11.00000    0.03251    0.01557 =
         0.02539    0.00006   -0.00245   -0.00010
O20   7    0.567303    0.674548    0.479793    11.00000    0.02550    0.01971 =
         0.02888    0.00052   -0.00198   -0.00063
O21   7    0.436193    0.661600    0.431408    11.00000    0.03109    0.02118 =
         0.02205    0.00074   -0.00398    0.00272
O22   7    0.466171    0.732040    0.516269    11.00000    0.02895    0.02141 =
         0.02613   -0.00106   -0.00199    0.00273
O23   7    0.365488    0.662512    0.557357    11.00000    0.03607    0.01810 =
         0.03175    0.00080    0.00346   -0.00117
O24   7    0.519903    0.676967    0.613630    11.00000    0.03636    0.02011 =
         0.02847   -0.00112    0.00145    0.00062
O25   7    0.605923    0.745344    0.572637    11.00000    0.03091    0.02011 =
         0.03358   -0.00056    0.00049   -0.00077
O26   7    0.555888    0.810637    0.463067    11.00000    0.03060    0.02537 =
         0.02822   -0.00077    0.00357    0.00310
O27   7    0.428911    0.800728    0.417417    11.00000    0.03930    0.02339 =
         0.02635   -0.00366   -0.00161   -0.00020
O28   7    0.323288    0.716872    0.467763    11.00000    0.03323    0.02159 =
         0.03138    0.00004   -0.00304    0.00429
O29   7    0.424708    0.775864    0.595413    11.00000    0.03577    0.02182 =
         0.03083   -0.00049    0.00181    0.00295
O30   7    0.515418    0.845463    0.551938    11.00000    0.03554    0.02234 =
         0.02523   -0.00093   -0.00205   -0.00271
O31   7    0.385617    0.833086    0.503205    11.00000    0.03199    0.02488 =
         0.02914    0.00023    0.00107    0.00471
O32   7    0.284451    0.780553    0.551657    11.00000    0.03482    0.02431 =
         0.04930   -0.00626    0.00990    0.00221
O33   7    0.551718    0.806155    0.653668    11.00000    0.04917    0.02651 =
         0.03711   -0.00054   -0.00416    0.00275
O34   7    0.472449    0.922970    0.465557    11.00000    0.04650    0.02307 =
         0.03201    0.00340    0.00675    0.00407
O35   7    0.545505    0.569736    0.378950    11.00000    0.03713    0.01970 =
         0.02792    0.00023    0.00054    0.00179
O36   7    0.509686    0.579562    0.259949    11.00000    0.06126    0.03877 =
         0.04075   -0.00512    0.00658    0.00003
O37   7    0.646018    0.584977    0.307636    11.00000    0.04764    0.03661 =
         0.04657   -0.00224    0.01161    0.00323
O38   7    0.502176    0.717629    0.253143    11.00000    0.06463    0.04417 =
         0.03772    0.00749    0.01205   -0.00197
O39   7    0.639159    0.728467    0.300108    11.00000    0.05375    0.04248 =
         0.05045    0.00068    0.01433   -0.00128
C1    9    0.477168    0.508993    0.190108    11.00000    0.07159
C2    9    0.532866    0.537049    0.233399    11.00000    0.04834
C3    9    0.599354    0.512543    0.239118    11.00000    0.05217
C4    9    0.651450    0.539618    0.276204    11.00000    0.04482
C5    9    0.723952    0.515054    0.278863    11.00000    0.05828
C6    9    0.453273    0.802413    0.196523    11.00000    0.05637
C7    9    0.512891    0.773558    0.236001    11.00000    0.05107
C8    9    0.571636    0.809842    0.247403    11.00000    0.06258
C9    9    0.631456    0.783595    0.276499    11.00000    0.05068
C10   9    0.697099    0.824095    0.278586    11.00000    0.05310
F1    6    0.429443    0.476033    0.208012    11.00000    0.09231
F2    6    0.501402    0.468021    0.159009    11.00000    0.10099
F3    6    0.446424    0.558165    0.161196    11.00000    0.11612
F4    6    0.747406    0.481189    0.322168    11.00000    0.08076
F5    6    0.766778    0.565130    0.276859    11.00000    0.08508
F6    6    0.732841    0.475180    0.241067    11.00000    0.09603
F7    6    0.396464    0.771252    0.191637    11.00000    0.07007
F8    6    0.441125    0.866663    0.209124    11.00000    0.08073
F9    6    0.471695    0.805270    0.151128    11.00000    0.08082
F10   6    0.696927    0.880259    0.303677    11.00000    0.09192
F11   6    0.705173    0.842145    0.232295    11.00000    0.11741
F12   6    0.751677    0.794475    0.299393    11.00000    0.15648
O1W   7    0.665957    0.517066    0.563417    11.00000    0.05536
N101  8    0.206678    0.789016    0.258482    11.00000    0.04107
C101  9    0.136269    0.757927    0.256623    11.00000    0.04364
C102  9    0.134966    0.699488    0.292792    11.00000    0.05217
C103  9    0.060002    0.680453    0.292185    11.00000    0.06116
C104  9    0.054852    0.622389    0.330042    11.00000    0.07310
C111  9    0.198479    0.844614    0.218807    11.00000    0.04398
C112  9    0.263405    0.884629    0.217979    11.00000    0.05372
C113  9    0.247304    0.942365    0.179424    11.00000    0.04960
C114  9    0.309848    0.987693    0.180947    11.00000    0.05434
C121  9    0.259285    0.737563    0.248984    11.00000    0.04341
C122  9    0.244404    0.700742    0.197999    11.00000    0.04633
C123  9    0.298646    0.645063    0.198942    11.00000    0.05066
C124  9    0.282570    0.584546    0.230912    11.00000    0.06391
C131  9    0.234517    0.817562    0.312301    11.00000    0.03919
C132  9    0.192268    0.872414    0.330574    11.00000    0.05022
C133  9    0.226513    0.886942    0.388520    11.00000    0.06806
C134  9    0.187886    0.943918    0.409150    11.00000    0.09064
N201  8    0.112477    0.649668    0.539077    11.00000    0.04359
C201  9    0.063424    0.613235    0.568428    11.00000    0.05228
C202  9    0.099485    0.574353    0.615349    11.00000    0.05041
C203  9    0.043786    0.537703    0.639340    11.00000    0.05904
C204  9    0.076993    0.505780    0.691036    11.00000    0.07017
C211  9    0.159912    0.600566    0.517396    11.00000    0.04897
C212  9    0.121352    0.545387    0.485361    11.00000    0.05305
C213  9    0.175121    0.499482    0.466533    11.00000    0.05345
C214  9    0.140998    0.438015    0.438929    11.00000    0.06126
C221  9    0.067170    0.688657    0.497144    11.00000    0.05134
C222  9    0.105913    0.728859    0.462335    11.00000    0.06797
C223  9    0.057463    0.769921    0.422638    11.00000    0.07195
C224  9    0.021284    0.828574    0.443866    11.00000    0.10578
C231  9    0.160917    0.696236    0.576314    11.00000    0.04953
C232  9    0.123356    0.748882    0.602042    11.00000    0.05200
C233  9    0.175796    0.788212    0.638619    11.00000    0.06239
C234  9    0.143149    0.841077    0.668156    11.00000    0.05929
N301  8    0.652741    1.013131    0.402373    11.00000    0.03496
C301  9    0.644752    1.083376    0.381637    11.00000    0.03892
C302  9    0.651187    1.091221    0.325713    11.00000    0.04634
C303  9    0.629466    1.162278    0.306762    11.00000    0.04862
C304  9    0.639552    1.175810    0.252438    11.00000    0.05893
C311  9    0.721872    0.983794    0.396443    11.00000    0.04199
C312  9    0.785102    1.020726    0.425919    11.00000    0.04948
C313  9    0.850527    0.985098    0.415291    11.00000    0.06920
C314  9    0.915670    1.019139    0.448514    11.00000    0.08192
C321  9    0.597417    0.967472    0.371555    11.00000    0.03690
C322  9    0.525288    0.992363    0.365627    11.00000    0.03950
C323  9    0.476976    0.939603    0.337349    11.00000    0.04878
C324  9    0.400246    0.959499    0.333132    11.00000    0.06786
C331  9    0.645171    1.015163    0.458403    11.00000    0.03673
C332  9    0.664146    0.952076    0.489042    11.00000    0.03972
C333  9    0.646095    0.959826    0.542704    11.00000    0.04086
C334  9    0.676491    0.903367    0.578118    11.00000    0.04680
C11   9    0.937651    0.839125    0.206191    11.00000    0.12497
CL11 10    0.840589    0.846446    0.188392    11.00000    0.10889
CL12 10    0.960380    0.841618    0.266310    11.00000    0.15139
C21   9    0.332907    0.701553    0.046812    11.00000    0.07075
CL21 10    0.367504    0.620115    0.041894    11.00000    0.11913
CL22 10    0.386671    0.761254    0.026715    11.00000    0.14494
C31   9    0.120267    0.393512    0.582747    11.00000    0.06306
CL31 10    0.206121    0.405914    0.583820    11.00000    0.26513
CL32 10    0.158130    0.305680    0.607358    11.00000    0.54204
HKLF    4

REM  Template texray.inf
REM R1 =  0.0526 for   24518 Fo > 4sig(Fo)  and  0.0627 for all   28691 data
REM    807 parameters refined using      1 restraints

END

WGHT      0.0698    177.3875

REM Highest difference peak  5.145,  deepest hole -4.525,  1-sigma level  0.277
Q1    1   0.1183  0.3130  0.6165  11.00000  0.05    5.14
Q2    1   0.4592  0.7284  0.3554  11.00000  0.05    4.76
Q3    1   0.9588  0.8407  0.2821  11.00000  0.05    3.43
Q4    1   0.1814  0.2570  0.5947  11.00000  0.05    3.02
Q5    1   0.2061  0.3291  0.6103  11.00000  0.05    2.94
Q6    1   0.6416  0.6790  0.5622  11.00000  0.05    2.92
Q7    1   0.3396  0.6548  0.4004  11.00000  0.05    2.84
Q8    1   0.9707  0.8470  0.2430  11.00000  0.05    2.75
Q9    1   0.7507  0.7816  0.2762  11.00000  0.05    2.58
Q10   1   0.0989  0.3986  0.5638  11.00000  0.05    2.49
Q11   1   0.4075  0.7488  0.0591  11.00000  0.05    2.48
Q12   1   0.3584  0.6217  0.0192  11.00000  0.05    2.45
Q13   1   0.3666  0.7587  0.0079  11.00000  0.05    2.31
Q14   1   0.7370  0.8145  0.2496  11.00000  0.05    2.24
Q15   1   0.5094  0.5858  0.6141  11.00000  0.05    2.23
Q16   1   0.7577  0.8008  0.3318  11.00000  0.05    2.22
Q17   1   0.3792  0.6306  0.0669  11.00000  0.05    2.00
Q18   1   0.9169  0.8357  0.1916  11.00000  0.05    1.79
Q19   1   0.8649  0.8534  0.1872  11.00000  0.05    1.68
Q20   1   0.1352  0.3896  0.6016  11.00000  0.05    1.66
;
_shelx_res_checksum   28584

_shelx_hkl_file
;
   0   0   1   -1.80    0.30
   0   0   3   23.40    3.20
   0   0   4  852.40   21.70
   0   0   5   16.90    4.70
   0   0   7   24.60    5.80
   0   0   813871.00  261.60
   0   0   9    3.40    6.70
   0   0  10  233.80   12.30
   0   0  11   24.30    7.80
   0   0  12 1010.90   46.10
   0   0  13   22.00   14.70
   0   0  1424458.40  637.30
   0   0  15   16.30   21.00
   0   0  16  986.10   43.70
   0   0  17  -73.90   31.60
   0   0  18 2426.60   90.40
   0   0  19  -38.30   19.10
   0   0  20  221.40   24.50
   0   0  21   24.40   19.60
   0   0  22 5046.70  157.00
   0   0  23   38.60   23.50
   0   0  24   46.40   25.40
   0   0  25   16.30   25.30
   0   0  26 1515.30   81.10
   0   0  27   24.30   30.50
   0   0  28  773.80   58.50
   0   0  29    7.80   30.90
   0   0  30  130.40   38.60
   0   0  31   46.40   31.90
   0   0  32 2227.30  118.00
   0   0  33   64.30   41.80
   0   0  34 2509.10  127.70
   0   0  35  -70.90   35.50
   0   0  36  528.70   67.20
   0   1   0   -1.70    0.30
   0   1   2  428.80   13.40
   0   1   3  205.20    5.10
   0   1   416696.00  563.60
   0   1   5 8290.40  116.40
   0   1   612678.10  176.40
   0   1   7 9863.40  140.60
   0   1   8 1089.20   21.10
   0   1   9  370.30   10.50
   0   1  10 4999.00   76.40
   0   1  11   15.00    5.30
   0   1  12 8536.80  191.60
   0   1  13 6154.20  136.90
   0   1  14 1186.50   34.60
   0   1  15  423.30   18.90
   0   1  1649750.50  993.60
   0   1  17 6075.40  251.80
   0   1  19 2237.40   61.90
   0   1  20 2435.70   61.60
   0   1  21 1385.30   40.90
   0   1  22 3209.90   78.90
   0   1  23 2995.50   80.50
   0   1  24  140.40   19.90
   0   1  25  562.30   30.90
   0   1  26  194.50   26.90
   0   1  27 1598.60   60.20
   0   1  28  566.50   37.20
   0   1  29   84.60   23.30
   0   1  30   73.90   23.20
   0   1  31 1483.90   65.10
   0   1  32  524.90   38.40
   0   1  33  465.80   35.90
   0   1  34  688.50   42.50
   0   1  35   16.30   26.50
   0   1  36   20.20   39.40
   0   2   1  735.70   12.80
   0   2   3   95.70    3.80
   0   2   4  222.10    6.10
   0   2   6 3176.40   51.70
   0   2   7 8807.60  125.50
   0   2   8  857.90   17.70
   0   2   921102.30  272.10
   0   2  10  395.10   10.00
   0   2  1117987.20  236.00
   0   2  12  383.90   18.40
   0   2  13   61.80   10.80
   0   2  14  647.70   23.20
   0   2  15 2548.10   62.20
   0   2  16 1593.10   45.90
   0   2  1712273.00  258.20
   0   2  1826465.00  503.10
   0   2  19  863.60   33.10
   0   2  20 2405.70   61.10
   0   2  21 8748.50  178.20
   0   2  22 1031.40   39.30
   0   2  23 1222.40   43.50
   0   2  24  201.20   21.80
   0   2  25  902.90   41.30
   0   2  26 3137.40   88.10
   0   2  27  113.60   22.90
   0   2  28  328.90   25.30
   0   2  29 1008.90   50.30
   0   2  30 2271.10   83.00
   0   2  31 1780.80   70.70
   0   2  32  308.70   32.20
   0   2  33  241.70   27.80
   0   2  34  198.20   29.30
   0   2  35 2508.70  103.90
   0   2  36  110.30   42.50
   0   3   0   33.70    3.10
   0   3   111259.60  313.80
   0   3   2 3604.50   52.70
   0   3   315315.20  318.40
   0   3   4  228.00    6.00
   0   3   5 7786.70  107.80
   0   3   6 2944.10   46.70
   0   3   7 9195.50  126.40
   0   3   8  126.60    5.80
   0   3   9 7731.00  109.00
   0   3  10   15.20    5.50
   0   3  11   55.60    6.40
   0   3  1218001.60  359.50
   0   3  13   26.30   10.90
   0   3  1415510.90  298.10
   0   3  15   97.30   12.70
   0   3  16   34.60   13.10
   0   3  17  308.40   18.40
   0   3  18 2208.60   63.30
   0   3  19  538.40   25.40
   0   3  20 1734.80   48.20
   0   3  21 1054.30   38.30
   0   3  22 1473.90   44.80
   0   3  23 8862.90  191.00
   0   3  24   -6.40   17.60
   0   3  25 1726.00   55.30
   0   3  26 1578.80   50.90
   0   3  27  696.40   41.10
   0   3  28   38.10   19.90
   0   3  29  192.50   30.70
   0   3  30 7560.50  192.00
   0   3  31 1386.80   64.60
   0   3  32 3937.50  122.10
   0   3  33   50.00   22.70
   0   3  34 1116.40   48.00
   0   3  35   77.30   25.80
   0   4   1 5881.20   83.70
   0   4   2 2539.40   37.60
   0   4   4 1313.30   20.60
   0   4   516223.00  242.80
   0   4   6 2802.00   44.20
   0   4   7 3909.60   57.70
   0   4   8 4013.40   59.10
   0   4   9 9213.00  123.40
   0   4  10 8812.70  123.70
   0   4  11  255.60   10.90
   0   4  12 3745.80   88.30
   0   4  13 5193.20  108.20
   0   4  14 4498.60   96.20
   0   4  15   95.40   13.70
   0   4  16   -9.50   12.30
   0   4  17 4535.30  107.90
   0   4  18 7987.30  172.40
   0   4  19 3358.50   85.90
   0   4  20  112.40   16.50
   0   4  21  165.80   19.30
   0   4  22  392.10   24.20
   0   4  23 1026.60   39.60
   0   4  24   41.30   18.70
   0   4  25  367.20   25.90
   0   4  26   85.40   21.50
   0   4  27 2533.70   80.70
   0   4  28 2068.30   68.50
   0   4  29  354.30   35.00
   0   4  3013192.60  303.80
   0   4  31 2591.90   88.20
   0   4  32 3924.80  124.20
   0   4  33   14.10   27.10
   0   4  34  313.80   30.50
   0   4  35  136.70   23.50
   0   5   0   24.60    4.00
   0   5   213039.50  212.30
   0   5   3  410.10    9.10
   0   5   423414.20  812.70
   0   5   521686.60  399.50
   0   5   614286.50  192.40
   0   5   7 7802.90  110.70
   0   5   8  998.30   19.40
   0   5   9 8143.10  112.40
   0   5  10 1240.10   26.30
   0   5  11 6026.60   98.70
   0   5  13  600.20   26.80
   0   5  1451575.10 1220.50
   0   5  15 7744.10  153.70
   0   5  16 4400.00   97.50
   0   5  17   -5.30   13.90
   0   5  18 7047.20  150.70
   0   5  19 2892.60   74.00
   0   5  20 1676.90   50.20
   0   5  21   81.30   18.40
   0   5  22   55.00   17.70
   0   5  23 2957.80   83.90
   0   5  24 2069.10   68.00
   0   5  25 1134.90   45.00
   0   5  26    5.50   19.10
   0   5  27  213.80   24.20
   0   5  28  113.60   23.40
   0   5  29   36.80   22.00
   0   5  30  -13.10   21.40
   0   5  31   -0.10   25.50
   0   5  32 1585.60   59.00
   0   5  33  -17.90   20.80
   0   5  34  255.90   28.60
   0   5  35   61.30   28.50
   0   6   023398.50  605.50
   0   6   1  837.60   17.10
   0   6   215887.30  306.00
   0   6   3 3760.20   60.60
   0   6   5 7788.20  110.70
   0   6   635980.60 1330.40
   0   6   712291.60  167.10
   0   6   8 6489.50   91.70
   0   6   9 7335.30  109.00
   0   6  10 2486.30   45.20
   0   6  1112346.50  199.90
   0   6  1221217.20  406.00
   0   6  13    5.20   13.30
   0   6  14 1227.20   36.90
   0   6  15 3046.80   75.40
   0   6  16   -8.30   13.10
   0   6  17  977.50   34.50
   0   6  18  276.20   19.20
   0   6  19   14.60   15.10
   0   6  20 2335.50   63.60
   0   6  21 1324.00   38.90
   0   6  22  329.70   23.50
   0   6  23  651.10   32.50
   0   6  24  902.10   39.30
   0   6  25  195.00   24.10
   0   6  26   -4.90   19.70
   0   6  27 3051.50   88.60
   0   6  28 2925.20   93.30
   0   6  29 2775.50   91.80
   0   6  30 9780.70  241.60
   0   6  31   -2.30   24.60
   0   6  32 1064.40   48.10
   0   6  33  657.50   42.70
   0   6  34  696.60   41.80
   0   6  35  -20.50   23.40
   0   7   0   14.20    4.40
   0   7   1 9730.20  131.20
   0   7   2  307.50    7.70
   0   7   3 5275.30   73.00
   0   7   4   48.70    4.60
   0   7   5  136.80    6.10
   0   7   6  104.90    5.70
   0   7   717193.80  223.50
   0   7   8  626.20   13.60
   0   7   9 2242.20   40.50
   0   7  1010687.20  157.20
   0   7  1325352.50  641.80
   0   7  1444430.40  919.50
   0   7  15 1220.20   38.00
   0   7  16  186.20   18.20
   0   7  17 2852.90   74.80
   0   7  18 1645.20   45.70
   0   7  19 4201.70   95.80
   0   7  20  496.50   23.30
   0   7  21   93.60   16.40
   0   7  22   78.10   18.20
   0   7  23 3458.70   92.00
   0   7  24   36.90   23.10
   0   7  25  115.30   22.10
   0   7  26 1602.40   61.10
   0   7  27  178.90   24.40
   0   7  28  611.50   37.40
   0   7  29   49.30   24.50
   0   7  30  403.00   32.50
   0   7  31  620.90   38.50
   0   7  32  582.00   39.60
   0   7  33 4145.40  128.50
   0   7  34    5.60   22.70
   0   7  35  674.20   58.20
   0   8   0 4018.70   82.10
   0   8   1  455.40   10.70
   0   8   2 1624.00   26.60
   0   8   3  487.30   10.60
   0   8   4 1714.60   28.60
   0   8   5   61.00    5.20
   0   8   6 2803.60   46.30
   0   8   7   39.70    5.20
   0   8   8  149.70    7.40
   0   8   920761.50  282.80
   0   8  10 4701.90   83.50
   0   8  11 3329.10   73.20
   0   8  1216750.30  321.20
   0   8  13 4447.00   97.00
   0   8  1417635.60  331.40
   0   8  15 2311.20   54.60
   0   8  16   -2.90   12.20
   0   8  17 3397.50   87.00
   0   8  1818951.50  357.60
   0   8  19  375.80   24.10
   0   8  20 9898.50  200.00
   0   8  21  294.50   21.70
   0   8  22  356.00   22.30
   0   8  23  886.60   35.60
   0   8  24  707.90   32.70
   0   8  25 1013.70   41.70
   0   8  26  908.60   42.30
   0   8  27  240.00   28.40
   0   8  28 1803.70   69.00
   0   8  29 5424.00  143.90
   0   8  30 6072.60  162.90
   0   8  31  988.90   50.70
   0   8  32 2562.50   88.40
   0   8  33  450.70   38.10
   0   8  34  423.30   37.60
   0   9   0   40.20    5.60
   0   9   1 5317.40   73.10
   0   9   231195.20  740.60
   0   9   3 3743.80   55.00
   0   9   4 6873.90   96.90
   0   9   512240.90  164.50
   0   9   6 1706.40   30.90
   0   9   727758.40  371.70
   0   9   8  335.50   10.30
   0   9   9 7032.40  104.30
   0   9  10 6234.40  106.40
   0   9  11  823.30   25.70
   0   9  12 2198.30   52.30
   0   9  13 5697.40  121.80
   0   9  14   40.80   13.50
   0   9  1512756.70  244.20
   0   9  16   17.50   13.40
   0   9  17  545.40   24.10
   0   9  18  637.40   28.40
   0   9  19 2650.60   69.70
   0   9  20   83.70   17.50
   0   9  21 3857.90   93.30
   0   9  22  144.60   20.80
   0   9  23 5239.20  126.10
   0   9  24 1837.30   60.40
   0   9  25 1246.50   47.60
   0   9  26  200.60   25.10
   0   9  27  330.60   29.40
   0   9  28 1280.80   53.90
   0   9  29   11.10   22.10
   0   9  30 5587.20  154.70
   0   9  31   61.30   22.70
   0   9  32  535.70   38.60
   0   9  33  187.60   26.50
   0   9  34 1559.90   73.10
   0  10   055824.00 1938.30
   0  10   1 7736.50  100.60
   0  10   2 9609.80  126.50
   0  10   348875.90 1847.60
   0  10   4  157.50    6.30
   0  10   515234.50  213.40
   0  10   6 1006.70   21.60
   0  10   7   82.90    6.70
   0  10   8 3517.00   56.20
   0  10   9 5123.50   88.90
   0  10  10  327.40   12.40
   0  10  11 5985.10  109.90
   0  10  12 3963.30   91.80
   0  10  13 1444.10   36.60
   0  10  14  351.80   18.00
   0  10  15  358.70   20.10
   0  10  16  422.90   20.80
   0  10  1714596.30  286.50
   0  10  1810358.00  203.50
   0  10  1919436.30  358.50
   0  10  2017397.70  333.60
   0  10  21  382.00   28.40
   0  10  22    4.90   17.00
   0  10  23 4877.90  117.50
   0  10  24  121.50   20.00
   0  10  25 2160.40   68.40
   0  10  26  970.00   43.10
   0  10  27   28.20   20.60
   0  10  28  110.60   24.20
   0  10  29   39.20   18.10
   0  10  30   20.70   19.40
   0  10  31 1575.50   63.90
   0  10  32   29.10   22.10
   0  10  33   58.10   19.80
   0  11   0   40.20    5.10
   0  11   119411.20  236.50
   0  11   2 6464.50   87.20
   0  11   3 9094.00  124.30
   0  11   4  185.20    6.70
   0  11   5 2687.90   45.30
   0  11   6 1930.90   35.20
   0  11   7 3868.00   66.90
   0  11   8  286.90   10.60
   0  11   9  424.20   12.90
   0  11  10 5513.10   96.60
   0  11  11  141.50   11.90
   0  11  12 1190.40   37.10
   0  11  13 8550.70  171.90
   0  11  14 2666.10   61.90
   0  11  1510536.30  217.10
   0  11  1621438.80  407.80
   0  11  17 1823.00   53.50
   0  11  1838812.90  683.90
   0  11  1919143.80  356.70
   0  11  20 2685.80   71.20
   0  11  21 1866.30   56.90
   0  11  22  362.20   24.60
   0  11  23 1600.20   51.90
   0  11  24  381.20   34.90
   0  11  25  370.60   26.00
   0  11  26   51.30   23.10
   0  11  27   57.90   21.00
   0  11  28  151.70   22.40
   0  11  29   38.30   20.20
   0  11  30  -16.10   20.70
   0  11  31  229.10   29.50
   0  11  32  299.90   32.20
   0  11  33  -18.60   20.80
   0  12   121367.40  454.20
   0  12   248688.20 1853.20
   0  12   321829.60  307.70
   0  12   4  370.50   10.50
   0  12   5 4274.10   72.10
   0  12   6  107.30    7.30
   0  12   710731.10  164.20
   0  12   8   52.90    6.80
   0  12   9 4135.00   74.60
   0  12  10   38.60    6.80
   0  12  11   12.50    8.00
   0  12  12 3526.60   81.60
   0  12  13 1501.50   42.30
   0  12  14 6427.00  135.90
   0  12  15   78.80   16.40
   0  12  16  486.00   26.00
   0  12  17   12.60   15.90
   0  12  18  246.00   23.20
   0  12  19 4408.60  107.10
   0  12  20 1490.50   47.20
   0  12  21 6450.80  144.30
   0  12  22  972.70   37.20
   0  12  23  235.20   22.70
   0  12  24 1967.70   63.70
   0  12  25 1600.60   56.10
   0  12  26  248.90   26.20
   0  12  27  325.40   27.30
   0  12  28 1700.00   61.50
   0  12  29    1.20   19.40
   0  12  30  566.10   36.70
   0  12  31   17.30   21.40
   0  12  32  274.90   32.00
   0  13   0   -8.30   25.70
   0  13   1 5135.90  101.40
   0  13   2  132.40    4.80
   0  13   319616.10  275.70
   0  13   4  146.50    7.00
   0  13   5 1222.80   26.00
   0  13   6  274.10   10.20
   0  13   7  740.60   18.10
   0  13   8  495.50   15.00
   0  13   9  636.30   17.40
   0  13  10 1041.20   26.00
   0  13  11  774.80   23.30
   0  13  12 9496.80  191.20
   0  13  13 1592.70   45.50
   0  13  14 1622.80   48.80
   0  13  15 1429.20   45.40
   0  13  16 4886.70  120.90
   0  13  17 5702.90  131.40
   0  13  18 7162.60  158.20
   0  13  19  593.80   27.30
   0  13  20 3350.10   98.40
   0  13  21   16.90   19.20
   0  13  22  955.30   39.50
   0  13  23 2070.20   66.00
   0  13  24  745.80   35.80
   0  13  25  566.60   33.30
   0  13  26    2.50   16.80
   0  13  27 1576.20   58.00
   0  13  28  468.30   32.70
   0  13  29  801.90   44.60
   0  13  30   33.60   22.80
   0  13  31  715.20   41.70
   0  13  32   50.70   26.70
   0  14   0  135.60   27.10
   0  14   1 8788.90  255.90
   0  14   2 5000.20   96.20
   0  14   3 5503.10   82.80
   0  14   4 4901.00   78.10
   0  14   5  521.40   13.20
   0  14   6  217.70    8.90
   0  14   7  127.40    8.50
   0  14   8  128.50    8.20
   0  14   9 1022.90   25.00
   0  14  10 5731.30  103.50
   0  14  11 4879.00   98.90
   0  14  12 1644.10   44.50
   0  14  13 1222.80   39.50
   0  14  14 1985.70   56.00
   0  14  15 1419.20   47.70
   0  14  16   97.80   17.40
   0  14  17   38.80   14.70
   0  14  18  454.60   26.20
   0  14  19 3414.70   87.10
   0  14  20  890.30   37.40
   0  14  21 7087.90  170.30
   0  14  22 2033.50   67.90
   0  14  23  660.40   35.30
   0  14  24  724.70   36.90
   0  14  25 3818.00  113.30
   0  14  26    9.90   21.70
   0  14  27  144.90   23.50
   0  14  28  973.20   44.90
   0  14  29  136.90   28.60
   0  14  30 1912.80   72.70
   0  14  31   56.00   32.70
   0  15   0   38.70   26.70
   0  15   1 8844.90  261.80
   0  15   2  335.80   27.70
   0  15   3 7698.40  146.50
   0  15   4  256.70    7.00
   0  15   5  593.40   14.00
   0  15   614059.50  213.80
   0  15   7 4005.20   70.70
   0  15   815464.00  236.80
   0  15   9  610.10   18.40
   0  15  10 1289.90   32.00
   0  15  11 1153.40   31.00
   0  15  12 1320.80   39.70
   0  15  13  179.40   16.60
   0  15  14 1298.80   42.40
   0  15  15 6035.70  145.80
   0  15  16   48.40   20.50
   0  15  17 1310.10   47.20
   0  15  18   72.50   17.10
   0  15  19  835.00   34.70
   0  15  20 3465.90   92.00
   0  15  21  309.20   25.20
   0  15  22 4488.90  121.80
   0  15  23  205.60   23.30
   0  15  24   12.70   15.60
   0  15  25  730.70   40.40
   0  15  26 1189.50   50.00
   0  15  27  201.00   24.20
   0  15  28  672.10   39.20
   0  15  29 1164.30   56.40
   0  15  30   36.60   25.10
   0  16   0  248.40   35.80
   0  16   1 1425.60   59.20
   0  16   2 7325.30  225.10
   0  16   3 2572.50  100.40
   0  16   4  973.70   26.00
   0  16   5 1162.00   25.50
   0  16   6 1104.30   23.60
   0  16   7 1852.20   36.70
   0  16   8 2701.80   51.40
   0  16   9  843.00   23.80
   0  16  1015693.10  305.30
   0  16  11 2238.10   58.80
   0  16  12 9264.00  195.00
   0  16  13   72.30   13.90
   0  16  14  334.90   21.00
   0  16  15  705.70   32.10
   0  16  16   52.30   17.30
   0  16  17 3115.70   90.00
   0  16  18   27.30   18.20
   0  16  19 3577.80   96.80
   0  16  20  352.70   26.40
   0  16  21  215.20   22.10
   0  16  22  342.00   25.10
   0  16  23 3559.60  105.70
   0  16  24 4999.50  143.50
   0  16  25   91.30   32.50
   0  16  26 4753.90  156.80
   0  16  27 2038.50   88.50
   0  16  28  477.30   38.40
   0  16  29  113.00   26.90
   0  17   0   17.30   29.90
   0  17   1  965.50   49.80
   0  17   2  269.40   29.40
   0  17   3 1916.50   80.50
   0  17   4  731.00   41.60
   0  17   5 8870.00  175.00
   0  17   617999.10  400.00
   0  17   7 8463.40  202.30
   0  17   823491.90  423.40
   0  17   9  739.60   27.20
   0  17  10 6966.50  160.10
   0  17  1117884.60  352.50
   0  17  12 3824.30   92.80
   0  17  13  151.50   15.70
   0  17  14   31.20   13.50
   0  17  15 5729.00  138.00
   0  17  16 3795.70  117.50
   0  17  17  116.40   31.70
   0  17  18 1354.90   56.30
   0  17  19  195.50   22.60
   0  17  20  166.00   22.90
   0  17  21  120.70   19.80
   0  17  22   42.40   20.40
   0  17  23 1037.70   55.40
   0  17  24  488.60   35.70
   0  17  25  718.20   46.00
   0  17  26   -6.10   21.70
   0  17  27    7.60   22.30
   0  17  28  262.40   31.30
   0  18   0 9229.40  423.40
   0  18   1   29.10   28.70
   0  18   2 2748.90  117.50
   0  18   3   49.50   23.50
   0  18   4 3980.10  143.60
   0  18   5 7167.70  234.50
   0  18   610947.30  335.90
   0  18   714202.20  319.90
   0  18   8 2401.80   75.90
   0  18   9 2925.80   85.80
   0  18  10  929.40   42.40
   0  18  11 9335.40  219.00
   0  18  12 1282.00   51.60
   0  18  13 1847.30   65.10
   0  18  14  233.80   22.00
   0  18  15 6981.00  200.00
   0  18  16    0.10   18.40
   0  18  17 3069.00  104.20
   0  18  18  -20.20   19.20
   0  18  19   -8.40   16.20
   0  18  20   83.10   20.40
   0  18  21  560.10   37.20
   0  18  22  502.20   36.20
   0  18  23  331.60   36.80
   0  18  24  140.30   31.40
   0  18  25   62.50   30.80
   0  18  26 1727.80  163.00
   0  18  27 1506.70  136.60
   0  19   0   51.10   38.30
   0  19   1 6374.80  224.80
   0  19   2 4122.60  159.50
   0  19   3  876.50   52.20
   0  19   4 5773.50  201.70
   0  19   5  193.40   30.60
   0  19   6 1266.20   60.70
   0  19   7 2181.60   95.10
   0  19   8 2350.00   96.90
   0  19   9 1224.10   62.10
   0  19  1013958.40  412.00
   0  19  11 7897.50  246.60
   0  19  12 3797.20  144.00
   0  19  13 2472.40  104.10
   0  19  14   34.80   22.20
   0  19  15  318.50   35.00
   0  19  16   62.80   27.70
   0  19  17  -27.40   20.10
   0  19  18   90.00   24.90
   0  19  19   58.40   29.80
   0  19  20  184.60   30.60
   0  19  21  135.90   31.80
   0  19  22   88.90   25.70
   0  19  23  -35.50   24.50
   0  19  24 1182.10  108.70
   0  19  25  -45.80   62.20
   0  19  26 1183.90  130.80
   0  20   0 1240.80  103.70
   0  20   1  688.00   49.30
   0  20   2  698.10   46.90
   0  20   3 1263.70   66.50
   0  20   4 1698.60   82.60
   0  20   5  319.60   33.40
   0  20   6  973.60   53.90
   0  20   7   85.60   27.10
   0  20   8 3545.80  135.70
   0  20   9 1178.30   67.90
   0  20  10    9.80   26.80
   0  20  11  147.30   27.20
   0  20  12 4758.20  176.00
   0  20  13   52.60   26.30
   0  20  14 2291.90  104.80
   0  20  15 3837.20  151.90
   0  20  16  667.50   51.50
   0  20  17 2064.30  101.30
   0  20  18 1075.70   65.80
   0  20  19  582.50   48.10
   0  20  20 6607.10  256.10
   0  20  21  741.70   98.20
   0  20  22 1591.30  153.60
   0  20  23  345.60   70.80
   0  20  24  125.00   55.50
   0  20  25 1055.70   90.40
   0  21   0   57.40   35.20
   0  21   1  598.30   49.00
   0  21   2 6733.70  227.20
   0  21   3  113.00   26.80
   0  21   4 2097.70   89.00
   0  21   5   63.80   28.40
   0  21   6  174.20   27.70
   0  21   7  499.50   40.60
   0  21   8 3066.50  131.50
   0  21   9  376.10   35.80
   0  21  10 1695.40   82.70
   0  21  11   83.30   25.90
   0  21  12 1758.80   91.80
   0  21  13 1533.60   78.70
   0  21  14 1530.20   87.10
   0  21  15 1684.60   88.30
   0  21  16   94.00   31.60
   0  21  17  174.60   33.50
   0  21  18  424.50   67.70
   0  21  19 1221.20  130.70
   0  21  20 1476.40  137.80
   0  21  21  -10.30   50.60
   0  21  22  682.70   97.20
   0  21  23  -28.80   44.40
   0  22   0 1974.50  117.70
   0  22   1 2622.40  112.80
   0  22   2 1802.70   88.60
   0  22   3 2929.00  119.10
   0  22   4 6006.00  209.40
   0  22   5  308.80   35.30
   0  22   6 4316.40  168.80
   0  22   7  492.90   44.50
   0  22   8 1427.10   75.70
   0  22   9   67.70   22.00
   0  22  10 2617.10  123.20
   0  22  11  189.90   29.40
   0  22  12  406.00   39.00
   0  22  13  390.00   42.20
   0  22  14  -11.40   21.10
   0  22  15   27.40   34.40
   0  22  16  667.70   73.90
   0  22  17  204.30   60.00
   0  22  18   44.30   46.00
   0  22  19  786.60  105.30
   0  22  20 5494.10  351.60
   0  22  21  779.30  104.20
   0  22  22 1437.70  131.80
   0  23   0    8.10   33.00
   0  23   1  375.00   33.20
   0  23   2  647.60   44.90
   0  23   3 2270.30  103.50
   0  23   4   95.00   27.30
   0  23   5  617.60   47.10
   0  23   6   21.10   22.20
   0  23   7   70.70   21.80
   0  23   8  220.30   31.10
   0  23   9 2506.60  108.10
   0  23  10  142.10   28.90
   0  23  11 1025.40   83.60
   0  23  12  379.80   59.90
   0  23  13   59.80   45.30
   0  23  14  429.70   66.10
   0  23  15 1336.20  127.30
   0  23  16   56.40   51.60
   0  23  17  484.90   82.40
   0  23  18 1749.00  174.30
   0  23  19 1182.80  108.00
   0  23  20 1153.90  107.20
   0  24   0  207.20   42.00
   0  24   1  809.80   51.00
   0  24   2  764.40   54.00
   0  24   3   76.50   26.40
   0  24   4 1196.80   72.80
   0  24   5 5603.50  213.10
   0  24   6  332.20   59.00
   0  24   7  842.20   78.40
   0  24   8  359.00   60.10
   0  24   9    5.60   33.60
   0  24  10   84.50   51.10
   0  24  11  195.00   48.50
   0  24  12  122.00   51.40
   0  24  13   18.40   42.10
   0  24  14   -9.30   57.30
   0  24  15 1088.60  111.80
   0  24  16  455.40   66.00
   0  24  17  -15.00   39.10
   0  24  18  116.90   60.40
   0  25   0   17.60   34.30
   0  25   1  952.50  105.10
   0  25   2   23.40   38.00
   0  25   3 4558.90  308.90
   0  25   4 3016.20  188.70
   0  25   5  642.70   72.20
   0  25   6 1441.90  110.30
   0  25   7  373.50   57.20
   0  25   8  141.20   49.90
   0  25   9  269.10   59.70
   0  25  10 1074.50  112.50
   0  25  11   84.90   54.00
   0  25  12 1279.60  120.40
   0  25  13   53.80   41.90
   0  25  14   99.70   49.30
   0  25  15  475.20   75.30
   0  25  16   -8.40   33.90
   0  26   7 3121.70  221.60
   0  26   8 1053.20  101.30
   0  26   9 2010.20  165.50
   0  26  10 1036.10  121.90
   0  26  11  126.20   43.60
   0  26  12   72.30   52.90
   0  26  13 2386.80  151.10
   1   0 -36   25.20   42.40
   1   0 -35 4612.80  218.30
   1   0 -34  -57.70   39.00
   1   0 -33 3919.50  159.10
   1   0 -32   17.40   32.90
   1   0 -31  403.40   41.40
   1   0 -30   13.80   27.10
   1   0 -29 1751.70   94.80
   1   0 -28   -4.10   27.30
   1   0 -27  400.30   43.90
   1   0 -26   33.10   44.50
   1   0 -25  360.80   36.20
   1   0 -24  -34.10   22.90
   1   0 -23 1027.20   49.70
   1   0 -22   65.20   26.30
   1   0 -21   94.60   16.90
   1   0 -20   74.10   23.10
   1   0 -19 7259.00  222.30
   1   0 -18 -104.80   42.60
   1   0 -17  994.80   51.30
   1   0 -16  -25.70   20.30
   1   0 -15   80.20   17.20
   1   0 -14  -10.50   16.50
   1   0 -13 9566.10  279.90
   1   0 -12   12.10   10.50
   1   0 -11 3068.70   72.00
   1   0 -10    7.20    6.30
   1   0  -9  157.30    8.90
   1   0  -8    4.00    6.20
   1   0  -7 5714.20  120.40
   1   0  -6    3.20    5.30
   1   0  -4   13.10    3.70
   1   0  -310677.60  269.30
   1   0   0   -4.40    1.00
   1   0   2   29.40    3.20
   1   0   3 1320.80   28.80
   1   0   4    7.30    4.10
   1   0   5 3035.60   65.10
   1   0   6   18.30    6.00
   1   0   712838.30  241.20
   1   0   8    8.80    7.20
   1   0   9 2057.20   50.40
   1   0  10   21.50    7.70
   1   0  11  735.10   27.40
   1   0  12   18.90   14.90
   1   0  1315335.20  411.70
   1   0  14    6.80   18.40
   1   0  1519221.70  525.30
   1   0  16    1.60   19.60
   1   0  17  147.90   26.20
   1   0  18   -8.40   22.50
   1   0  19  143.70   24.30
   1   0  20    1.50   17.90
   1   0  21 2365.30   87.90
   1   0  22   -7.30   17.30
   1   0  23  340.40   33.30
   1   0  24   42.90   29.60
   1   0  2516405.10  491.20
   1   0  26    8.70   36.30
   1   0  27 4001.40  166.70
   1   0  28  -18.10   29.10
   1   0  29  817.10   58.50
   1   0  30  -27.70   24.40
   1   0  31    9.90   29.70
   1   0  32   57.00   31.30
   1   0  33  562.20   54.20
   1   0  34   27.80   37.50
   1   0  35   23.80   37.60
   1   1 -36  -18.30   32.00
   1   1 -35 1321.00   60.00
   1   1 -34   44.00   24.40
   1   1 -33 1140.10   53.50
   1   1 -32  713.70   42.50
   1   1 -31   39.40   21.80
   1   1 -30   28.10   23.00
   1   1 -29  122.30   23.70
   1   1 -28 1166.20   50.70
   1   1 -27  109.30   22.80
   1   1 -26  690.50   36.30
   1   1 -25  223.80   19.50
   1   1 -24   18.90   16.00
   1   1 -23 1726.40   54.50
   1   1 -22   78.10   17.00
   1   1 -21  969.40   34.80
   1   1 -20  501.60   25.10
   1   1 -1955558.00  987.40
   1   1 -16 6012.20  123.80
   1   1 -1510517.40  203.30
   1   1 -14  854.90   28.00
   1   1 -13 2246.00   59.90
   1   1 -12   19.50    8.80
   1   1 -11 1925.60   33.30
   1   1 -10  177.70    7.00
   1   1  -9  965.20   19.10
   1   1  -8 9790.60  134.00
   1   1  -7  540.80   12.80
   1   1  -5 8209.00  113.90
   1   1  -4 1358.40   23.00
   1   1  -3 1457.70   23.70
   1   1  -2 4079.50   63.30
   1   1   1   46.30    7.30
   1   1   2   82.50    2.90
   1   1   3  547.60   11.20
   1   1   410299.00  158.40
   1   1   510094.60  140.80
   1   1   6   36.00    4.60
   1   1   8 1224.20   23.40
   1   1   9 8384.60  114.10
   1   1  10   82.00    6.10
   1   1  11 9038.20  131.40
   1   1  12 1964.70   58.80
   1   1  13 6607.80  145.10
   1   1  1413965.70  269.30
   1   1  15 1940.10   51.70
   1   1  16   45.20   13.20
   1   1  1727317.50  508.60
   1   1  18 6840.30  144.50
   1   1  19 2621.40   68.00
   1   1  20 1824.20   54.90
   1   1  21 1229.20   37.60
   1   1  22 2858.60   74.80
   1   1  23  212.70   23.10
   1   1  24 1215.60   47.10
   1   1  25  740.00   38.50
   1   1  26  380.70   31.80
   1   1  27 1307.50   53.90
   1   1  28  824.30   42.00
   1   1  29   39.00   22.80
   1   1  30   83.70   26.80
   1   1  31   64.90   23.30
   1   1  32  611.30   43.10
   1   1  33  400.00   33.10
   1   1  34   -9.10   24.20
   1   1  35   25.50   27.70
   1   2 -36 1237.40  103.10
   1   2 -35 2121.50   86.60
   1   2 -34  754.00   44.80
   1   2 -33  174.00   25.30
   1   2 -32  587.10   40.00
   1   2 -31 1230.70   61.60
   1   2 -30  124.10   25.30
   1   2 -29 1977.20   70.00
   1   2 -28   33.30   19.70
   1   2 -27   85.60   21.50
   1   2 -26  228.90   23.90
   1   2 -25  142.40   22.20
   1   2 -24  347.60   27.30
   1   2 -23 4857.70  109.50
   1   2 -22 5155.10  110.60
   1   2 -21  151.30   17.30
   1   2 -20  553.30   24.50
   1   2 -1928439.50  520.00
   1   2 -1818741.00  399.50
   1   2 -1710953.10  224.30
   1   2 -16 3370.30   80.50
   1   2 -15  341.70   18.20
   1   2 -14 3337.00   75.40
   1   2 -13    9.70    9.30
   1   2 -12 8802.30  168.70
   1   2 -11   52.80    5.90
   1   2 -1016122.70  209.50
   1   2  -9    4.30    4.70
   1   2  -8 3124.70   48.50
   1   2  -7 1502.80   27.80
   1   2  -6   36.60    4.20
   1   2  -5  114.40    5.10
   1   2  -412090.40  227.40
   1   2  -3   29.70    2.80
   1   2  -2   83.50    3.00
   1   2   0  340.80    7.00
   1   2   2 2668.10   40.60
   1   2   3  445.90    9.50
   1   2   418386.80  660.40
   1   2   5 1612.40   29.60
   1   2   619776.40  379.40
   1   2   7   53.80    5.30
   1   2   8 3577.30   58.10
   1   2   9 4402.20   66.90
   1   2  1014156.10  194.50
   1   2  11  972.40   23.90
   1   2  12 4136.20   99.50
   1   2  13 8302.80  176.10
   1   2  14 1202.20   35.50
   1   2  15 1132.30   32.40
   1   2  16  143.00   15.90
   1   2  17 4704.90  116.00
   1   2  18  120.00   17.50
   1   2  19 1351.40   43.40
   1   2  20 3505.70   82.40
   1   2  21  478.30   24.80
   1   2  22 2243.60   61.00
   1   2  23 1031.50   39.80
   1   2  24 3125.70   87.90
   1   2  2518689.10  385.50
   1   2  26 1207.50   52.40
   1   2  27 6600.30  165.10
   1   2  28 1498.00   63.30
   1   2  29  223.20   29.20
   1   2  30 1270.80   57.60
   1   2  31  587.00   39.70
   1   2  32  894.10   47.90
   1   2  33  137.10   27.00
   1   2  34  827.40   45.20
   1   2  35   55.60   26.30
   1   3 -36  -96.60   43.60
   1   3 -35 5751.70  171.50
   1   3 -34   42.00   26.60
   1   3 -33  188.60   27.10
   1   3 -32   60.60   28.30
   1   3 -31 2067.00   75.60
   1   3 -30  172.00   27.10
   1   3 -29   63.60   25.50
   1   3 -28 5864.20  150.80
   1   3 -27  394.40   32.80
   1   3 -26 2027.10   65.70
   1   3 -25  139.70   21.90
   1   3 -24 2530.90   68.60
   1   3 -23 1264.90   45.00
   1   3 -22  448.60   25.60
   1   3 -21  874.60   31.00
   1   3 -20 5485.80  120.10
   1   3 -19 2651.20   69.70
   1   3 -18 2641.20   70.50
   1   3 -17 3643.10   94.00
   1   3 -16 2995.50   74.80
   1   3 -15  163.80   12.40
   1   3 -14 1459.90   40.20
   1   3 -13 6904.80  153.70
   1   3 -12 3075.60   70.00
   1   3 -11   17.00    5.80
   1   3 -10 3765.90   56.80
   1   3  -9 2297.60   38.40
   1   3  -811092.70  147.90
   1   3  -714986.80  195.60
   1   3  -6 3192.70   48.10
   1   3  -514951.20  191.40
   1   3  -4  520.20   10.80
   1   3  -3 5457.20   75.30
   1   3  -2   41.30    3.10
   1   3  -1 8014.10  140.90
   1   3   0   55.80    2.20
   1   3   1   43.70    2.40
   1   3   3   55.70    3.50
   1   3   5  343.00   10.10
   1   3   6 2096.40   36.70
   1   3   7 2270.80   37.30
   1   3   8 5146.10   74.20
   1   3   9 3139.80   50.50
   1   3  10 4567.70   71.40
   1   3  11 6901.40  123.50
   1   3  12 1872.80   52.50
   1   3  1317345.30  323.20
   1   3  14  667.80   23.10
   1   3  15 3953.20   90.80
   1   3  16 1550.20   46.90
   1   3  17   29.00   13.70
   1   3  18 6372.00  142.70
   1   3  19   75.70   15.00
   1   3  20  701.10   27.60
   1   3  21  837.80   33.10
   1   3  2210120.30  212.50
   1   3  23    4.30   18.80
   1   3  24  890.70   39.60
   1   3  25 4592.10  117.80
   1   3  26 1268.90   48.40
   1   3  27  910.40   42.80
   1   3  28    1.70   19.50
   1   3  29 6646.40  172.40
   1   3  30  442.30   40.80
   1   3  3111068.80  276.50
   1   3  32  543.50   41.20
   1   3  33  510.90   38.10
   1   3  34  544.50   38.80
   1   3  35 1176.10   64.00
   1   4 -36 1119.10  100.40
   1   4 -35  221.00   28.80
   1   4 -34  395.20   32.20
   1   4 -33  126.80   28.80
   1   4 -32   69.50   22.90
   1   4 -31 6412.80  170.70
   1   4 -30  239.40   30.20
   1   4 -29 2376.10   74.80
   1   4 -28  758.80   38.30
   1   4 -27   88.20   21.50
   1   4 -26   67.70   21.40
   1   4 -25 1779.50   58.10
   1   4 -24 6251.90  146.70
   1   4 -2310157.00  218.70
   1   4 -22 4065.30   99.50
   1   4 -21 2730.10   74.20
   1   4 -20   21.70   14.00
   1   4 -19 1045.70   38.80
   1   4 -18 1472.20   48.10
   1   4 -17 5285.00  129.60
   1   4 -16 3585.70   92.50
   1   4 -15  468.00   20.70
   1   4 -14 1689.30   45.60
   1   4 -13   11.90   10.50
   1   4 -12 3594.90   74.50
   1   4 -11 7330.90  111.20
   1   4 -1028419.00  351.90
   1   4  -9 2700.00   42.90
   1   4  -8 3894.90   58.40
   1   4  -7   94.20    6.00
   1   4  -6   78.90    6.10
   1   4  -4 4499.10   62.40
   1   4  -1  168.10    5.00
   1   4   0 2534.90   45.00
   1   4   1 8590.30  131.00
   1   4   2  465.80    9.10
   1   4   4 7823.40  106.70
   1   4   5  509.60   11.60
   1   4   612006.80  164.90
   1   4   7  569.30   12.80
   1   4   8  642.30   12.90
   1   4   9 1464.40   24.20
   1   4  10  132.30    7.00
   1   4  11 5251.80  105.00
   1   4  1213742.20  260.10
   1   4  13 9020.50  171.60
   1   4  1417960.90  323.40
   1   4  1519043.20  344.50
   1   4  16 5051.30  114.80
   1   4  17 4690.70  110.40
   1   4  1810227.60  210.90
   1   4  19  696.60   28.30
   1   4  20 6049.60  139.30
   1   4  21   33.50   18.30
   1   4  22  391.20   27.70
   1   4  23  924.90   38.60
   1   4  24    6.10   18.90
   1   4  25 1663.10   56.80
   1   4  26 1991.10   68.00
   1   4  27  183.10   22.50
   1   4  28  108.80   22.40
   1   4  29 5736.50  150.70
   1   4  30 5082.70  146.40
   1   4  31 7352.20  193.20
   1   4  32 3175.00  103.50
   1   4  33   63.00   30.00
   1   4  34  318.50   31.00
   1   4  35   76.90   29.60
   1   5 -35   -5.30   21.90
   1   5 -34   61.80   24.40
   1   5 -33  701.50   40.60
   1   5 -32   44.20   22.70
   1   5 -31  154.50   27.00
   1   5 -30  239.30   31.60
   1   5 -29  836.20   44.70
   1   5 -28  568.20   34.20
   1   5 -27   62.70   21.20
   1   5 -26 1216.60   46.40
   1   5 -25 1066.60   46.60
   1   5 -24 4964.80  121.30
   1   5 -23 8779.50  188.90
   1   5 -22  639.00   31.60
   1   5 -21 2677.60   68.70
   1   5 -20 6512.70  144.80
   1   5 -19  169.20   18.40
   1   5 -18 6427.20  146.00
   1   5 -1711404.30  232.90
   1   5 -16  132.40   15.90
   1   5 -15  196.10   14.30
   1   5 -14  658.40   21.90
   1   5 -13 9745.40  194.50
   1   5 -12 5391.00  104.70
   1   5 -11 3200.10   54.90
   1   5 -10 4439.20   72.60
   1   5  -9 8519.60  118.90
   1   5  -8 3849.00   58.00
   1   5  -638186.40  926.90
   1   5  -535242.90 1251.80
   1   5  -443170.90 1456.30
   1   5  -320620.30  459.00
   1   5  -2  408.60    9.20
   1   5  -1  593.80   10.90
   1   5   022607.20  811.60
   1   5   1  457.60    9.30
   1   5   218092.40  393.10
   1   5   3 3536.30   52.10
   1   5   4 1882.80   31.20
   1   5   5  710.50   14.80
   1   5   6  459.60   10.90
   1   5   7   46.40    5.10
   1   5   813179.20  180.90
   1   5   9   22.50    5.10
   1   5  1015693.70  242.90
   1   5  12 5352.00  156.10
   1   5  1425455.30  621.00
   1   5  1516984.60  330.10
   1   5  1610517.10  210.90
   1   5  17 8842.10  185.70
   1   5  18   47.30   13.60
   1   5  19 2929.30   71.60
   1   5  20  258.00   19.20
   1   5  21 1639.10   50.10
   1   5  22  677.80   30.30
   1   5  23  228.10   23.10
   1   5  24  317.00   25.00
   1   5  25  463.30   30.00
   1   5  26  149.00   22.90
   1   5  27  242.50   23.60
   1   5  28  -22.90   24.30
   1   5  29  110.00   25.80
   1   5  30  213.80   33.70
   1   5  31  190.70   28.20
   1   5  32  191.90   27.60
   1   5  33  348.60   34.70
   1   5  34   96.20   25.10
   1   5  35   59.20   32.90
   1   6 -35  257.80   31.90
   1   6 -34  333.90   30.20
   1   6 -33  177.70   27.80
   1   6 -32    4.20   21.00
   1   6 -31 3220.10  100.30
   1   6 -30 2065.60   73.20
   1   6 -29 1641.40   59.40
   1   6 -28 3334.70   98.60
   1   6 -27  548.10   35.10
   1   6 -26   14.90   20.30
   1   6 -25   16.70   20.30
   1   6 -24  861.40   39.60
   1   6 -23  447.60   28.00
   1   6 -22 1955.00   60.00
   1   6 -21 3878.10   88.90
   1   6 -20   70.80   21.30
   1   6 -19 8032.40  171.20
   1   6 -18 1385.70   40.70
   1   6 -17  356.60   20.80
   1   6 -16  999.40   32.50
   1   6 -15  239.30   15.00
   1   6 -14 1181.50   35.20
   1   6 -13  637.90   23.90
   1   6 -12 4642.30   91.70
   1   6 -11 5898.10   93.00
   1   6 -10 8357.00  122.10
   1   6  -9 5692.80   88.00
   1   6  -8 9294.60  126.90
   1   6  -750599.30 1695.20
   1   6  -628055.00  503.70
   1   6  -4   96.50    6.30
   1   6  -2 4188.60   59.70
   1   6  -124186.00  508.60
   1   6   0  891.00   19.80
   1   6   116672.80  275.20
   1   6   2  161.20    5.30
   1   6   3 4697.70   68.20
   1   6   4  206.80    6.50
   1   6   5  183.90    6.60
   1   6   6 2774.50   45.00
   1   6   7 8027.80  112.20
   1   6   8  443.20   11.40
   1   6   9 2938.40   53.40
   1   6  10 3652.90   69.70
   1   6  1117795.70  308.30
   1   6  12   33.90   15.80
   1   6  1317145.90  371.30
   1   6  14 2151.30   61.40
   1   6  15   27.00   11.80
   1   6  16 7530.90  153.20
   1   6  17 1521.60   47.10
   1   6  18  517.70   23.80
   1   6  19  228.00   17.80
   1   6  20   66.30   16.20
   1   6  21  326.40   24.40
   1   6  22  560.40   28.90
   1   6  23 3269.90   89.50
   1   6  24   82.90   19.60
   1   6  25   51.00   19.80
   1   6  26 1526.00   57.90
   1   6  27 4427.50  115.50
   1   6  28  751.80   40.00
   1   6  29 9269.20  221.70
   1   6  30   35.00   23.60
   1   6  31 4296.70  131.60
   1   6  32  252.10   28.10
   1   6  33  124.00   30.30
   1   6  34   15.30   24.20
   1   6  35  209.00   36.80
   1   7 -35  178.10   31.00
   1   7 -34 1425.30   58.30
   1   7 -33  198.20   29.20
   1   7 -32 1357.80   58.80
   1   7 -31  467.60   32.50
   1   7 -30  255.80   28.40
   1   7 -29   83.50   23.90
   1   7 -28 2760.80   85.40
   1   7 -27  819.30   42.50
   1   7 -26 2702.10   83.10
   1   7 -25  -23.00   15.90
   1   7 -24  566.90   30.60
   1   7 -23 6703.70  149.00
   1   7 -22  834.90   34.70
   1   7 -21 2747.90   69.80
   1   7 -20 3496.60   82.10
   1   7 -19  282.60   20.40
   1   7 -18 5488.20  122.40
   1   7 -17 9026.00  187.10
   1   7 -16  596.70   25.20
   1   7 -15 1191.90   36.50
   1   7 -14 3198.80   75.30
   1   7 -1316944.90  320.00
   1   7 -1217667.70  336.60
   1   7 -11  353.10   11.00
   1   7 -10   52.90    7.10
   1   7  -9  618.00   14.70
   1   7  -849244.80 1649.20
   1   7  -7 6904.40   97.60
   1   7  -6  988.70   20.70
   1   7  -5 1626.80   30.40
   1   7  -411126.30  143.20
   1   7  -3 1335.90   21.60
   1   7  -2 3012.20   43.40
   1   7  -1 1038.40   16.70
   1   7   0 2229.80   41.60
   1   7   1  816.00   18.20
   1   7   211296.60  147.60
   1   7   3  149.60    5.60
   1   7   410746.90  142.50
   1   7   5 2075.70   35.70
   1   7   6 4562.70   69.00
   1   7   7 9456.10  128.20
   1   7   8 2493.60   40.40
   1   7   9   59.50    6.80
   1   7  1021731.10  330.80
   1   7  14   23.70   17.10
   1   7  1525443.10  489.50
   1   7  16 2380.60   66.70
   1   7  17   76.00   15.30
   1   7  18   53.90   15.20
   1   7  19   61.70   16.10
   1   7  20  136.50   17.90
   1   7  21  429.30   25.60
   1   7  22 2996.70   80.90
   1   7  23 1739.50   57.60
   1   7  24  827.80   37.50
   1   7  25  633.20   35.40
   1   7  26 1616.60   60.20
   1   7  27  502.60   35.00
   1   7  28  857.90   41.00
   1   7  29   62.90   22.50
   1   7  30  141.10   26.20
   1   7  31   93.00   27.10
   1   7  32 3066.10  102.60
   1   7  33   84.50   27.70
   1   7  34 2447.10   87.10
   1   8 -34  378.50   33.70
   1   8 -33   40.60   24.10
   1   8 -32  -16.90   21.50
   1   8 -31 1935.90   66.90
   1   8 -30 4331.60  121.70
   1   8 -29 2938.90   97.60
   1   8 -28 2247.60   76.80
   1   8 -27  312.10   29.40
   1   8 -26 2942.20   85.10
   1   8 -25  323.20   28.60
   1   8 -24  535.20   29.90
   1   8 -23 1112.00   45.40
   1   8 -22  148.90   21.20
   1   8 -21 1007.70   34.40
   1   8 -20  138.20   16.30
   1   8 -1910615.20  212.70
   1   8 -18   29.50   14.20
   1   8 -17 2230.10   56.30
   1   8 -16 9248.40  182.00
   1   8 -15 9913.30  193.20
   1   8 -14 1397.40   40.60
   1   8 -1314224.30  264.40
   1   8 -12 2049.40   52.00
   1   8 -11 1169.00   25.30
   1   8 -1023327.30  312.40
   1   8  -9  324.70   10.20
   1   8  -8   63.40    6.70
   1   8  -7 9548.80  139.60
   1   8  -615158.80  214.30
   1   8  -513199.20  175.40
   1   8  -4  100.50    5.20
   1   8  -3 3180.80   46.60
   1   8  -2  626.30   12.80
   1   8  -1  420.70    9.20
   1   8   0  495.80   12.90
   1   8   1  194.50    7.60
   1   8   2   13.60    3.20
   1   8   3  271.80    7.30
   1   8   4 5518.80   77.80
   1   8   5   82.80    5.30
   1   8   6 3787.80   58.50
   1   8   7 6851.00   96.70
   1   8   8 5736.10   88.40
   1   8   9 1848.30   35.70
   1   8  10 4354.40   77.80
   1   8  11 5548.20  112.20
   1   8  12 6318.70  134.90
   1   8  1313893.70  270.70
   1   8  14  256.90   18.20
   1   8  15 3008.60   77.00
   1   8  16 8997.90  187.50
   1   8  17 4640.60  110.80
   1   8  18 1149.10   41.10
   1   8  19 4751.00  109.60
   1   8  20  637.40   30.10
   1   8  21  196.50   19.50
   1   8  22 1991.10   60.50
   1   8  23  831.70   34.60
   1   8  24  349.90   28.70
   1   8  25 6711.90  165.90
   1   8  26   18.40   24.90
   1   8  27  653.80   39.50
   1   8  28 1394.10   59.70
   1   8  29 2343.70   82.90
   1   8  30 2581.80   86.80
   1   8  31 4110.60  118.60
   1   8  32   13.50   25.80
   1   8  33 1423.40   68.40
   1   8  34  -13.20   22.50
   1   9 -34  117.50   26.60
   1   9 -33   66.40   21.20
   1   9 -32   42.60   23.60
   1   9 -31 2785.90   90.40
   1   9 -30   12.50   25.20
   1   9 -29 2589.80   85.80
   1   9 -28  525.30   37.20
   1   9 -27  118.40   22.50
   1   9 -26  994.80   41.70
   1   9 -25   39.40   18.50
   1   9 -24  388.10   27.70
   1   9 -23   54.10   17.10
   1   9 -22 3557.10   87.50
   1   9 -21  537.20   26.20
   1   9 -20 2250.20   61.30
   1   9 -19 3412.80   83.50
   1   9 -18 2331.40   63.10
   1   9 -17 9168.80  185.30
   1   9 -16 1642.20   46.90
   1   9 -15 1610.40   40.90
   1   9 -14 8734.40  166.80
   1   9 -13   70.80   12.40
   1   9 -12  260.00   18.90
   1   9 -11  111.90    8.30
   1   9 -10  135.10    7.60
   1   9  -9  541.10   12.90
   1   9  -828218.90  391.10
   1   9  -7  624.80   14.40
   1   9  -611165.80  162.80
   1   9  -5  713.50   15.30
   1   9  -4 5383.40   76.90
   1   9  -3 7118.40   99.20
   1   9  -2 6098.50   86.20
   1   9  -1   24.20    5.70
   1   9   0 5711.30   94.00
   1   9   135799.70  641.40
   1   9   2   47.70    3.50
   1   9   316112.90  203.80
   1   9   4 9804.90  132.60
   1   9   5 2624.90   43.50
   1   9   6 6494.20   95.50
   1   9   7   81.00    6.30
   1   9   8 8779.80  137.60
   1   9   9  329.10   11.60
   1   9  10 3011.20   62.80
   1   9  11  633.00   19.80
   1   9  12  537.60   20.00
   1   9  13 1472.90   39.90
   1   9  1414777.30  281.70
   1   9  15 7010.90  142.90
   1   9  16 1891.70   55.20
   1   9  17 3224.90   82.10
   1   9  18 3112.60   74.10
   1   9  19  304.40   21.20
   1   9  20  414.20   23.10
   1   9  21 1517.50   48.00
   1   9  22 4193.70  110.40
   1   9  23 4050.30  108.60
   1   9  24 2680.90   80.10
   1   9  25  555.90   33.80
   1   9  26  -11.50   18.20
   1   9  27  432.30   29.80
   1   9  28  108.70   24.40
   1   9  29 1464.00   59.50
   1   9  30   80.70   21.60
   1   9  31 2616.80   84.10
   1   9  32  325.80   31.90
   1   9  33  224.80   25.80
   1   9  34  -46.50   49.60
   1  10 -34  124.90   25.60
   1  10 -33  449.70   36.30
   1  10 -32 1091.70   54.70
   1  10 -31  703.40   39.40
   1  10 -30  126.20   23.80
   1  10 -29   57.30   20.10
   1  10 -28  675.10   35.60
   1  10 -27   40.50   22.30
   1  10 -26  232.40   26.10
   1  10 -25  122.60   22.40
   1  10 -24 3364.10   89.10
   1  10 -23 1156.00   40.30
   1  10 -22  614.00   30.00
   1  10 -21 2107.90   56.20
   1  10 -20 2897.80   72.20
   1  10 -1913573.30  260.10
   1  10 -18 9270.60  188.30
   1  10 -17  115.70   18.30
   1  10 -16  798.00   29.60
   1  10 -15 7082.80  141.10
   1  10 -14  956.50   29.80
   1  10 -13  986.40   30.40
   1  10 -12 2298.00   55.20
   1  10 -11   10.70    8.50
   1  10 -10 4123.80   71.60
   1  10  -911158.20  156.70
   1  10  -8  103.20    7.00
   1  10  -7 9629.20  136.50
   1  10  -6  291.90    9.00
   1  10  -5  665.00   14.30
   1  10  -428374.90  401.60
   1  10  -3  175.20    6.10
   1  10  -220604.90  271.80
   1  10  -119970.10  289.60
   1  10   0 4195.60   72.20
   1  10   128434.40  409.20
   1  10   227321.70  479.70
   1  10   3  652.80   12.80
   1  10   4 5198.50   76.80
   1  10   514152.10  186.30
   1  10   6  188.00    8.30
   1  10   712159.80  188.30
   1  10   8  121.00    7.80
   1  10   9  115.00    8.00
   1  10  10 7480.70  140.60
   1  10  11 2266.50   50.60
   1  10  12 7944.50  159.20
   1  10  13   31.40    9.80
   1  10  14 1145.00   33.50
   1  10  15 1877.10   51.60
   1  10  16 1362.60   43.40
   1  10  17 5072.90  117.00
   1  10  1819711.00  357.90
   1  10  1911602.40  223.40
   1  10  20 2454.20   64.60
   1  10  21 2316.10   64.20
   1  10  22 3867.00  102.80
   1  10  23   -5.50   19.50
   1  10  24 2321.50   71.60
   1  10  25 4851.00  126.40
   1  10  26  417.80   33.60
   1  10  27 1703.20   65.90
   1  10  28  430.70   35.00
   1  10  29  478.30   32.30
   1  10  30  595.60   34.00
   1  10  31  163.70   26.50
   1  10  32  639.80   40.90
   1  10  33  222.80   28.60
   1  11 -33   35.80   22.20
   1  11 -32  454.60   34.00
   1  11 -31   -8.90   18.30
   1  11 -30  861.40   44.60
   1  11 -29  293.60   28.10
   1  11 -28   94.70   20.20
   1  11 -27  189.30   22.40
   1  11 -26   24.80   18.70
   1  11 -25  469.10   28.80
   1  11 -24 1633.00   57.70
   1  11 -23 1906.70   62.90
   1  11 -22   91.80   17.70
   1  11 -21 1378.20   45.70
   1  11 -2011417.40  234.90
   1  11 -1917906.80  345.00
   1  11 -18 1827.10   53.40
   1  11 -1740198.40  720.80
   1  11 -1617266.00  483.40
   1  11 -1511673.80  226.90
   1  11 -1415893.20  292.80
   1  11 -13 8607.70  173.40
   1  11 -12  194.20   16.00
   1  11 -11 2160.80   51.10
   1  11 -1012086.90  194.40
   1  11  -9   19.00    6.80
   1  11  -8  348.50   10.30
   1  11  -7   62.30    6.00
   1  11  -6 5495.50   85.30
   1  11  -5 8018.00  116.40
   1  11  -4  217.30    7.20
   1  11  -3 1259.30   22.50
   1  11  -2 7611.60  104.30
   1  11  -1 1817.90   36.30
   1  11   013140.00  212.60
   1  11   121316.40  309.30
   1  11   217687.70  261.90
   1  11   310137.80  138.40
   1  11   4   79.30    5.70
   1  11   5 2036.60   38.50
   1  11   614050.30  214.90
   1  11   7 1706.50   33.90
   1  11   8 1085.10   24.90
   1  11   9   52.30    7.00
   1  11  10 2272.60   48.80
   1  11  11 9633.40  177.00
   1  11  12 1518.00   40.90
   1  11  13 2062.60   51.70
   1  11  14 4920.70  108.90
   1  11  15  634.90   25.50
   1  11  16 1349.40   44.10
   1  11  17 8674.30  179.60
   1  11  1813560.10  268.60
   1  11  1912272.40  239.10
   1  11  20 4207.90  100.90
   1  11  21  642.50   28.90
   1  11  22  869.50   35.70
   1  11  23 1292.60   49.50
   1  11  24 1411.80   51.50
   1  11  25 2171.00   73.70
   1  11  26   32.10   19.90
   1  11  27  420.00   32.10
   1  11  28   89.90   21.70
   1  11  29  842.20   45.50
   1  11  30   30.20   21.20
   1  11  31  265.30   28.60
   1  11  32   24.90   18.90
   1  11  33  453.20   41.80
   1  12 -32  719.10   40.70
   1  12 -31   46.90   21.30
   1  12 -30  578.00   39.70
   1  12 -29 1200.10   52.20
   1  12 -28  234.00   27.60
   1  12 -27  112.20   23.40
   1  12 -26  267.00   27.00
   1  12 -25  748.70   33.80
   1  12 -24   18.70   17.50
   1  12 -23  195.60   21.20
   1  12 -22 6672.10  155.90
   1  12 -21  197.70   21.30
   1  12 -2011359.70  262.80
   1  12 -19   20.50   20.20
   1  12 -18   13.80   14.90
   1  12 -17 1464.50   50.30
   1  12 -16  106.80   17.30
   1  12 -15  155.10   18.20
   1  12 -14   45.70   14.00
   1  12 -13 4042.90   88.10
   1  12 -12 4017.70   91.60
   1  12 -11  378.50   15.40
   1  12 -10 1057.50   25.40
   1  12  -9 1109.60   24.60
   1  12  -8 1336.00   28.40
   1  12  -7 3390.80   58.50
   1  12  -6   30.00    5.60
   1  12  -5 7846.90  112.90
   1  12  -4 2194.70   38.30
   1  12  -3   89.00    5.50
   1  12  -2 2455.70   50.10
   1  12  -166922.70 2343.80
   1  12   021068.50  341.40
   1  12   312031.70  229.90
   1  12   4  512.30   13.10
   1  12   5 5327.50   88.50
   1  12   630946.10  435.80
   1  12   7 8675.60  134.70
   1  12   815378.00  224.20
   1  12   9   10.60    6.70
   1  12  10 3623.90   74.50
   1  12  11 1100.50   29.30
   1  12  12   12.90   11.30
   1  12  13 2368.30   59.50
   1  12  14  166.00   18.50
   1  12  15  700.90   25.80
   1  12  16  518.20   26.00
   1  12  17  836.20   33.10
   1  12  18  747.50   30.10
   1  12  19  376.90   23.00
   1  12  20 1796.80   55.80
   1  12  21 2784.90   75.90
   1  12  22 1225.40   45.00
   1  12  23 3017.60   85.60
   1  12  24 8282.40  189.60
   1  12  25 2904.10   87.90
   1  12  26  159.20   24.80
   1  12  27  -12.20   19.80
   1  12  28 1834.10   66.80
   1  12  29 1036.30   48.60
   1  12  30  188.50   27.10
   1  12  31  102.30   22.90
   1  12  32  176.60   25.40
   1  13 -32  436.00   34.10
   1  13 -31  313.30   33.30
   1  13 -30   23.20   23.70
   1  13 -29  759.70   41.70
   1  13 -28 1080.90   50.10
   1  13 -27   24.20   19.90
   1  13 -26   16.70   22.70
   1  13 -25 1228.70   49.70
   1  13 -24    0.00   19.30
   1  13 -23 1329.40   53.70
   1  13 -22    0.10   18.70
   1  13 -21  962.30   40.70
   1  13 -20  278.80   22.20
   1  13 -19 6195.60  140.90
   1  13 -18 4904.50  120.60
   1  13 -1710038.20  213.70
   1  13 -1624728.50  481.50
   1  13 -15 2258.40   60.60
   1  13 -14 1496.50   42.50
   1  13 -13   80.90   13.00
   1  13 -12 1395.70   39.00
   1  13 -11 1619.60   42.00
   1  13 -10 1527.60   33.20
   1  13  -9 1018.10   24.70
   1  13  -8 1541.50   33.20
   1  13  -7 3452.90   61.00
   1  13  -6 3847.60   68.50
   1  13  -5 6041.20   97.40
   1  13  -410537.20  160.30
   1  13  -3  789.60   17.10
   1  13  -2 3160.60   69.10
   1  13  -1 5970.60  117.80
   1  13   010935.40  211.10
   1  13   1 9829.30  190.20
   1  13   2 8393.90  167.50
   1  13   3   78.10    8.80
   1  13   410501.00  150.60
   1  13   510268.20  153.60
   1  13   612855.20  191.60
   1  13   718827.20  268.10
   1  13   8 3292.90   57.50
   1  13   9 2791.60   51.60
   1  13  10  965.40   27.90
   1  13  11 3938.80   79.20
   1  13  12  325.30   20.50
   1  13  13 6567.10  136.40
   1  13  14  832.30   32.40
   1  13  15    5.40   13.60
   1  13  16  439.00   26.40
   1  13  17 2708.60   83.00
   1  13  18    3.50   16.50
   1  13  19  916.40   36.80
   1  13  20  236.10   20.30
   1  13  21   87.60   17.40
   1  13  22 2614.20   70.40
   1  13  23   27.60   20.20
   1  13  24 3813.10  104.70
   1  13  25   13.30   20.70
   1  13  26 1917.50   68.80
   1  13  27  164.60   25.30
   1  13  28 4217.90  127.20
   1  13  29  -41.80   21.50
   1  13  30   91.80   24.60
   1  13  31  388.50   30.20
   1  14 -31 1212.80   59.90
   1  14 -30   19.40   23.90
   1  14 -29 1999.90   76.10
   1  14 -28  311.20   26.60
   1  14 -27 1191.80   46.20
   1  14 -26  460.00   33.30
   1  14 -25 1490.00   54.80
   1  14 -24 1979.20   68.60
   1  14 -23  432.60   26.20
   1  14 -22 2741.10   82.10
   1  14 -21  341.50   23.50
   1  14 -20 6189.30  149.40
   1  14 -19 3483.30   93.10
   1  14 -18  -23.50   18.60
   1  14 -17 9336.70  206.30
   1  14 -16  778.10   33.70
   1  14 -15 2010.60   59.00
   1  14 -14 4300.90  100.50
   1  14 -13 1113.90   35.40
   1  14 -12 1320.00   41.50
   1  14 -11 1555.70   39.50
   1  14 -10  455.10   16.20
   1  14  -9  429.30   13.70
   1  14  -8  135.10    8.30
   1  14  -7 1685.70   34.80
   1  14  -6  166.10    8.10
   1  14  -5   19.00    5.10
   1  14  -4  205.00    7.60
   1  14  -3   38.90    7.60
   1  14  -214318.90  260.80
   1  14  -1  884.90   24.50
   1  14   0  443.00   20.80
   1  14   1  607.20   19.00
   1  14   2 6481.10  125.90
   1  14   310316.60  196.10
   1  14   4 1537.20   40.80
   1  14   5 1001.00   20.20
   1  14   6  687.70   16.70
   1  14   7 4290.70   73.60
   1  14   8  385.80   13.20
   1  14   9 8098.50  132.10
   1  14  10 5372.90  109.80
   1  14  11 4376.60   89.20
   1  14  12 2190.70   55.40
   1  14  13 4782.10  104.90
   1  14  14   13.90   15.30
   1  14  1516140.50  326.30
   1  14  16  132.70   19.70
   1  14  17 2033.00   59.10
   1  14  18 1247.20   43.10
   1  14  19   46.00   18.70
   1  14  20 7622.40  177.30
   1  14  21 1551.60   54.00
   1  14  22  141.10   23.00
   1  14  23 5785.90  169.30
   1  14  24 5496.20  144.50
   1  14  25 2333.10   78.50
   1  14  26  612.90   32.20
   1  14  27  293.10   27.70
   1  14  28  687.70   41.20
   1  14  29   12.00   21.60
   1  14  30   37.30   21.20
   1  14  31  307.90   33.90
   1  15 -30  839.90   45.70
   1  15 -29  885.40   49.00
   1  15 -28 1004.40   47.60
   1  15 -27  316.70   26.20
   1  15 -26   66.70   19.30
   1  15 -25   34.80   22.00
   1  15 -24  146.90   22.50
   1  15 -23 1681.70   59.50
   1  15 -22   21.80   18.40
   1  15 -21 3710.30  105.00
   1  15 -20 1868.10   61.50
   1  15 -19   33.10   16.80
   1  15 -18  437.20   24.40
   1  15 -17  680.70   28.70
   1  15 -16 1117.70   41.00
   1  15 -15 1283.90   45.30
   1  15 -14   96.70   14.40
   1  15 -13  -33.00   12.30
   1  15 -12 2102.90   55.90
   1  15 -11  483.50   22.10
   1  15 -10    6.10    7.20
   1  15  -910982.60  171.00
   1  15  -8 4046.00   70.30
   1  15  -738039.60  665.10
   1  15  -6 4556.60   75.80
   1  15  -5 4391.90   70.80
   1  15  -4 1221.00   31.70
   1  15  -3 5600.90  109.10
   1  15  -211708.60  212.10
   1  15  -1 4909.70  115.60
   1  15   0 3540.30   72.60
   1  15   1 7774.40  150.40
   1  15   2 9289.70  176.30
   1  15   3   33.50    7.70
   1  15   4 1810.10   45.80
   1  15   5  329.40   14.30
   1  15   6  533.00   14.20
   1  15   7 4031.00   78.60
   1  15   8 2346.80   47.80
   1  15   9  567.20   17.00
   1  15  10 7596.90  145.00
   1  15  11  265.10   14.20
   1  15  12  131.20   15.20
   1  15  13 6242.10  135.10
   1  15  14 8418.60  175.20
   1  15  15 1367.40   48.90
   1  15  16 5872.30  144.70
   1  15  17 1037.90   39.30
   1  15  18  203.80   21.10
   1  15  19   48.40   17.60
   1  15  20  164.50   20.30
   1  15  21 2014.00   70.00
   1  15  22    1.10   18.80
   1  15  23   33.70   20.60
   1  15  24   74.30   21.90
   1  15  25 3258.30  100.70
   1  15  26    7.70   18.40
   1  15  27  601.00   36.00
   1  15  28  594.90   40.40
   1  15  29  214.80   34.80
   1  15  30   -4.60   23.60
   1  16 -29  176.70   39.10
   1  16 -28 2029.20   88.60
   1  16 -27 2103.20   88.90
   1  16 -26  122.40   27.70
   1  16 -2511267.80  277.90
   1  16 -24 6767.80  173.50
   1  16 -23 4212.30  121.80
   1  16 -22 3248.00   95.80
   1  16 -21  130.60   20.50
   1  16 -20  992.80   43.50
   1  16 -19   56.10   17.80
   1  16 -18 5087.90  127.00
   1  16 -17  372.10   25.40
   1  16 -16 2470.40   73.70
   1  16 -15   34.40   12.60
   1  16 -14  518.00   25.30
   1  16 -13  417.90   19.70
   1  16 -12  533.80   24.50
   1  16 -1117479.50  330.60
   1  16 -10  993.40   30.30
   1  16  -9 4740.80   84.60
   1  16  -8 3949.50   72.00
   1  16  -7  898.90   21.60
   1  16  -6 5099.50   83.20
   1  16  -5 6000.60   93.80
   1  16  -4 3298.00   67.60
   1  16  -3   23.40    5.40
   1  16  -216076.70  329.00
   1  16  -1   59.50    4.60
   1  16   0 3269.50   64.70
   1  16   1   95.20    6.40
   1  16   2  557.70   18.10
   1  16   3 9280.40  178.80
   1  16   4   98.00   10.30
   1  16   5  690.40   24.40
   1  16   6 1012.00   31.10
   1  16   7 1378.40   38.50
   1  16   8   56.10    8.80
   1  16   9 2303.80   63.50
   1  16  10 1034.30   36.70
   1  16  11 8906.20  188.60
   1  16  12  649.10   28.60
   1  16  13  397.60   22.20
   1  16  14  589.90   30.40
   1  16  15 6469.00  149.80
   1  16  16   -3.20   15.00
   1  16  17   77.80   16.40
   1  16  18 2248.60   72.30
   1  16  19   31.40   17.70
   1  16  20 1277.20   53.90
   1  16  21   20.20   17.70
   1  16  22  514.30   28.50
   1  16  23   20.20   19.40
   1  16  24    5.00   21.50
   1  16  25 1370.50   63.30
   1  16  26 2007.30   80.50
   1  16  27  562.20   49.30
   1  16  28  320.40   36.00
   1  16  29  243.00   33.10
   1  17 -28  689.70   63.90
   1  17 -27  -22.50   25.90
   1  17 -26   32.20   23.50
   1  17 -25  636.50   41.00
   1  17 -24 1690.30   72.30
   1  17 -23 3419.60  123.80
   1  17 -22  339.20   27.20
   1  17 -21  217.70   24.20
   1  17 -20  529.80   33.40
   1  17 -19  124.30   18.70
   1  17 -18  395.20   25.40
   1  17 -17 2711.60   79.40
   1  17 -16 1201.70   45.50
   1  17 -15 3936.20  105.70
   1  17 -14  725.40   32.70
   1  17 -13   24.10   13.30
   1  17 -12 7789.90  167.00
   1  17 -11 1230.30   38.70
   1  17 -10 4057.00   89.60
   1  17  -9 7777.60  161.40
   1  17  -8 9829.80  190.70
   1  17  -719803.80  355.00
   1  17  -614463.40  262.10
   1  17  -5 2475.90   53.00
   1  17  -4 1325.30   29.40
   1  17  -3   26.80   21.80
   1  17  -2  331.80   30.70
   1  17  -1  287.70   26.30
   1  17   0 2019.30   77.00
   1  17   1   20.70   22.50
   1  17   2  200.00    8.60
   1  17   3   31.20    6.50
   1  17   4 4578.50  104.30
   1  17   5  780.00   31.80
   1  17   6 1906.00   60.40
   1  17   711501.40  283.20
   1  17   8  684.40   33.60
   1  17   9 6373.20  171.20
   1  17  1011010.20  261.70
   1  17  11 4494.40  121.00
   1  17  12 1471.00   54.70
   1  17  13 8834.00  215.30
   1  17  1412471.70  306.00
   1  17  15 1190.50   53.50
   1  17  16 2618.90   89.80
   1  17  17   39.50   19.60
   1  17  18 1848.40   75.30
   1  17  19   30.50   17.00
   1  17  20  154.10   23.10
   1  17  21  139.30   23.60
   1  17  22  238.30   25.50
   1  17  23  141.40   25.30
   1  17  24  670.60   41.40
   1  17  25    9.50   22.30
   1  17  26  522.60   39.20
   1  17  27   -0.90   22.00
   1  17  28   -2.50   21.90
   1  18 -27 3953.80  254.30
   1  18 -26  125.30   65.40
   1  18 -25 2846.20  208.50
   1  18 -24  503.10   83.60
   1  18 -23  -25.20   26.70
   1  18 -22  142.90   58.60
   1  18 -21  332.80   35.00
   1  18 -20   -8.30   16.80
   1  18 -19   59.40   19.10
   1  18 -18   12.80   19.60
   1  18 -17   74.70   20.70
   1  18 -16 2563.90   88.50
   1  18 -15    2.90   15.40
   1  18 -14 2458.50   86.50
   1  18 -13  504.10   32.50
   1  18 -12 4440.40  125.90
   1  18 -11 1430.20   52.10
   1  18 -10 9802.80  237.60
   1  18  -9 3950.40  135.50
   1  18  -8 3421.70  123.10
   1  18  -712036.50  334.10
   1  18  -613002.70  365.50
   1  18  -512013.80  355.10
   1  18  -4  688.70   38.40
   1  18  -3  517.90   34.10
   1  18  -2 2318.90   84.70
   1  18  -1 2108.20   86.90
   1  18   0   17.70   23.80
   1  18   1 1078.20   61.80
   1  18   2  118.20   26.40
   1  18   3   30.40   23.40
   1  18   4  822.40   32.30
   1  18   5 1806.80   62.00
   1  18   6 6859.90  174.60
   1  18   7   20.00   11.60
   1  18   8  436.60   24.60
   1  18   9   50.30   16.20
   1  18  10 5694.60  154.60
   1  18  11 1588.10   57.10
   1  18  12 1774.40   62.00
   1  18  13 1966.70   71.40
   1  18  14 1992.10   69.90
   1  18  15   56.50   18.50
   1  18  16 9449.10  250.30
   1  18  17 1201.50   58.90
   1  18  18  784.80   43.00
   1  18  19  475.70   32.00
   1  18  20   63.60   21.30
   1  18  21  255.40   27.30
   1  18  22 1269.60   58.90
   1  18  23  986.90   52.00
   1  18  24   84.20   25.20
   1  18  25   31.70   30.30
   1  18  26 1332.50   87.00
   1  18  27  185.20   37.70
   1  19 -26   17.30   63.20
   1  19 -25  108.40   61.40
   1  19 -24   40.90   55.30
   1  19 -23   50.80   42.90
   1  19 -22  372.90   63.00
   1  19 -21  128.60   28.10
   1  19 -20   68.10   28.50
   1  19 -19  959.00   61.90
   1  19 -18   24.40   23.30
   1  19 -17 2838.30  129.00
   1  19 -16   18.90   25.80
   1  19 -15 1136.00   65.60
   1  19 -14   13.00   25.60
   1  19 -13  797.10   48.30
   1  19 -12 4535.10  176.80
   1  19 -11 9319.60  295.90
   1  19 -10   99.40   26.00
   1  19  -910649.40  309.10
   1  19  -8 8024.40  254.00
   1  19  -7  110.30   22.30
   1  19  -6  297.10   29.70
   1  19  -5 1122.80   56.50
   1  19  -4  282.10   33.30
   1  19  -3 1999.20   84.70
   1  19  -2 9911.40  307.00
   1  19  -1  874.60   50.90
   1  19   0 3208.80  126.70
   1  19   1  395.30   37.50
   1  19   2  -14.50   20.70
   1  19   3 2642.20  111.00
   1  19   4  848.60   53.10
   1  19   5 2482.50  106.80
   1  19   6   41.50   24.70
   1  19   7  361.60   38.20
   1  19   8 1732.40   73.70
   1  19   9 1592.70   77.70
   1  19  10 1983.80   85.20
   1  19  11 2327.90  108.70
   1  19  12 7603.60  252.10
   1  19  13  334.60   31.00
   1  19  14  269.00   29.70
   1  19  15 1219.00   69.40
   1  19  16  376.30   36.30
   1  19  17 2731.80  110.90
   1  19  18  141.10   33.40
   1  19  19 1755.00   92.90
   1  19  20  205.00   32.40
   1  19  21  572.70   47.30
   1  19  22   28.10   29.80
   1  19  23  783.40   61.90
   1  19  24  491.00   52.20
   1  19  25 1400.20   92.50
   1  19  26   83.20   51.50
   1  20 -25  357.40   69.60
   1  20 -24  881.60  126.10
   1  20 -23  -25.80   60.00
   1  20 -22  -14.10   37.30
   1  20 -21 2655.70  203.40
   1  20 -20   74.30   49.00
   1  20 -19 3488.90  226.50
   1  20 -18 1350.30   75.30
   1  20 -17  102.80   27.10
   1  20 -16 3050.80  122.10
   1  20 -15 1664.40   79.00
   1  20 -14  365.80   38.40
   1  20 -13 1687.90   84.30
   1  20 -12 3626.80  141.60
   1  20 -11  266.80   33.20
   1  20 -10   -0.50   24.60
   1  20  -9 5352.30  193.90
   1  20  -8  153.10   28.80
   1  20  -7 1730.80   81.10
   1  20  -6  135.80   24.60
   1  20  -5 1854.40   82.30
   1  20  -4 2505.20  107.00
   1  20  -3   62.00   35.90
   1  20  -2 3166.70  119.60
   1  20  -1  -12.10   22.70
   1  20   0   -5.50   23.20
   1  20   1  588.40   38.30
   1  20   2   47.30   24.70
   1  20   3 1770.80   85.70
   1  20   4   76.90   23.80
   1  20   5 4761.40  171.30
   1  20   6  153.80   29.10
   1  20   7  464.80   39.90
   1  20   8 4115.10  144.90
   1  20   9  944.90   52.00
   1  20  10 5229.30  186.70
   1  20  11 1080.00   61.20
   1  20  12 1721.50   89.20
   1  20  13 1999.80   89.00
   1  20  14 3442.10  152.80
   1  20  15  385.10   36.30
   1  20  16 3761.70  157.60
   1  20  17  175.10   31.00
   1  20  18  907.70   66.10
   1  20  19 1175.20   76.70
   1  20  20 3693.80  172.20
   1  20  21 3304.90  152.30
   1  20  22   34.00   28.80
   1  20  23  435.60   90.40
   1  20  24  525.80   87.20
   1  20  25  618.50   88.60
   1  21 -24   24.50   39.90
   1  21 -23  429.60   71.40
   1  21 -22  -13.00   62.60
   1  21 -21   24.70   46.60
   1  21 -20 2556.20  186.60
   1  21 -19  346.20   65.80
   1  21 -18 1575.20  133.30
   1  21 -17  572.60   67.80
   1  21 -16  221.90   60.40
   1  21 -15 2622.20  170.10
   1  21 -14 1276.50   69.30
   1  21 -1313654.30  428.40
   1  21 -12  -19.60   26.10
   1  21 -11 1762.60   97.00
   1  21 -10   82.60   25.90
   1  21  -9 3273.30  119.60
   1  21  -8 2232.70   95.10
   1  21  -7  452.10   38.70
   1  21  -6 3326.20  128.50
   1  21  -5   22.90   23.10
   1  21  -4 2710.40  113.00
   1  21  -3 1324.80   67.70
   1  21  -2 2289.70   96.90
   1  21  -1  363.00   32.40
   1  21   0   -3.40   26.90
   1  21   1 6968.90  242.00
   1  21   2 2906.80  127.80
   1  21   313394.10  404.70
   1  21   4 3486.10  138.20
   1  21   5  324.40   35.60
   1  21   6   -9.50   24.90
   1  21   7  336.40   36.90
   1  21   8   56.80   26.20
   1  21   9 2552.50  117.10
   1  21  10  -55.20   22.20
   1  21  11  312.60   30.90
   1  21  12   48.10   24.30
   1  21  13  423.20   35.90
   1  21  14 1154.90   69.10
   1  21  15 1435.40   75.10
   1  21  16  547.10   42.70
   1  21  17  929.20   60.80
   1  21  18   15.00   22.70
   1  21  19 1724.10   95.10
   1  21  20  217.40   78.00
   1  21  21 2140.80  194.10
   1  21  22  175.80   65.70
   1  21  23 1065.20   99.60
   1  22 -22   33.40   51.00
   1  22 -21  688.10   93.40
   1  22 -20  689.30  114.40
   1  22 -19  460.80   86.70
   1  22 -18   16.40   50.80
   1  22 -17 2015.40  163.80
   1  22 -16   97.60   45.60
   1  22 -15 1345.70  129.20
   1  22 -14  195.70   60.10
   1  22 -13   52.10   47.70
   1  22 -12   11.20   54.30
   1  22 -11  498.90   42.30
   1  22 -10  172.00   30.70
   1  22  -9 3784.90  154.90
   1  22  -8  397.80   37.20
   1  22  -7  685.50   53.40
   1  22  -6   17.50   23.80
   1  22  -5  377.30   34.20
   1  22  -4 1675.70   86.30
   1  22  -3  482.70   43.30
   1  22  -2 4658.40  170.10
   1  22  -1   54.20   26.80
   1  22   0  156.60   30.50
   1  22   1 5223.40  204.30
   1  22   2 3460.40  132.50
   1  22   313929.60  423.50
   1  22   4  572.60   48.30
   1  22   519851.90  575.10
   1  22   6 2336.30  108.20
   1  22   7 2979.40  132.40
   1  22   8   15.50   20.80
   1  22   9 2141.10   93.10
   1  22  10  639.50   47.60
   1  22  11  570.60   44.50
   1  22  12 2093.20  103.90
   1  22  13   15.10   24.10
   1  22  14  726.70   54.50
   1  22  15  -22.90   25.50
   1  22  16  142.00   30.80
   1  22  17  280.80   48.60
   1  22  18 1294.80  139.30
   1  22  19 7449.60  468.90
   1  22  20  684.60   82.00
   1  22  21 6660.70  364.00
   1  22  22   45.30   46.50
   1  23 -20  818.40  101.40
   1  23 -19   90.40   62.30
   1  23 -18  -46.50   50.40
   1  23 -17  482.40   84.20
   1  23 -16 3918.20  247.50
   1  23 -15 2391.40  183.90
   1  23 -14  418.30   59.30
   1  23 -1310143.90  526.10
   1  23 -12 1617.60  128.10
   1  23 -11 3159.60  218.00
   1  23 -10 3447.00  216.30
   1  23  -9  -76.80   42.50
   1  23  -8  839.00   96.70
   1  23  -7  499.60   71.50
   1  23  -6  526.60   43.50
   1  23  -5  435.30   36.10
   1  23  -4  236.30   29.90
   1  23  -3   46.50   22.60
   1  23  -2 2238.90   98.40
   1  23  -1   45.10   24.80
   1  23   0  332.80   32.30
   1  23   1 2149.90   97.50
   1  23   2 2415.50  107.40
   1  23   3 5518.10  197.70
   1  23   4  304.30   31.80
   1  23   5 2005.60  102.70
   1  23   6 2087.70   95.90
   1  23   7   22.20   25.40
   1  23   8  239.50   31.90
   1  23   9 1223.70   65.80
   1  23  10 1322.60   75.50
   1  23  11 1470.20   80.70
   1  23  12   29.40   25.70
   1  23  13 1629.90  387.70
   1  23  14  108.00   43.60
   1  23  15  159.20   54.30
   1  23  16    0.30   51.70
   1  23  17  603.10   98.10
   1  23  18  823.20   95.50
   1  23  19 3074.00  221.40
   1  23  20  562.60   94.90
   1  24 -18   84.70   48.40
   1  24 -17   60.30   41.80
   1  24 -16 1674.40  143.50
   1  24 -15   18.10   43.30
   1  24 -14  334.80   66.80
   1  24 -13   31.30   48.90
   1  24 -12 1406.00  111.10
   1  24 -11  462.00   62.80
   1  24 -10 1244.80  106.00
   1  24  -9  605.20   72.10
   1  24  -7   88.30   38.80
   1  24  -6 1628.60  125.50
   1  24  -5  377.70   74.60
   1  24  -4 1081.40  100.50
   1  24  -3  227.60   52.50
   1  24  -2  442.90   51.70
   1  24  -1   58.30   25.20
   1  24   0  930.80   58.90
   1  24   1 1957.50  102.00
   1  24   2 2432.70  115.80
   1  24   3 6006.10  212.30
   1  24   4 2616.80  123.90
   1  24   5 2518.10  111.30
   1  24   6 4578.70  190.70
   1  24   7  408.10   41.60
   1  24   8  769.60   50.10
   1  24   9  -41.00   40.40
   1  24  10 1040.30  108.00
   1  24  11  172.30   46.10
   1  24  12  911.00   93.30
   1  24  13  154.00   61.80
   1  24  14  281.20   65.60
   1  24  15  652.80   91.80
   1  24  16  -41.10   31.20
   1  24  17 1037.50  103.90
   1  24  18  224.70   56.50
   1  25 -16 1349.90  127.10
   1  25 -15 1380.30  134.30
   1  25 -14   46.40   31.10
   1  25 -13   86.90   42.40
   1  25 -12  102.00   41.60
   1  25 -11 1109.00  117.10
   1  25 -10  545.30   87.40
   1  25  -9 1350.20  130.30
   1  25  -8  329.80   62.40
   1  25  -7  278.10   56.90
   1  25  -6  533.30   61.80
   1  25  -5  404.60   54.20
   1  25  -4 4227.30  233.20
   1  25  -3  564.10   67.70
   1  25  -2 2540.10  173.10
   1  25  -1  135.20   44.50
   1  25   0   47.30   34.20
   1  25   1  784.80   90.20
   1  25   2 1615.20  142.30
   1  25   3  742.00   87.80
   1  25   4 1303.50   75.20
   1  25   5 6199.80  340.30
   1  25   6  180.00   44.50
   1  25   7  907.70   95.20
   1  25   8  193.50   35.80
   1  25   9  275.00   61.70
   1  25  10   42.90   42.40
   1  25  11  741.60   96.00
   1  25  12   81.90   45.70
   1  25  13 1113.30  113.40
   1  25  14  142.60   51.40
   1  25  15  257.70   59.80
   1  26 -13  225.00   62.90
   1  26 -12  583.00   86.80
   1  26 -11  723.00   86.20
   1  26 -10  243.70   56.30
   1  26  -9 1161.70  127.50
   1  26  -8  899.20  100.30
   1  26  -7 1080.40  113.50
   1  26  -6   55.20   44.50
   1  26  -5  150.50   51.10
   1  26  -4    7.50   37.70
   1  26  -3   29.90   35.20
   1  26  -2  210.70   58.80
   2   0 -36 3177.20  239.90
   2   0 -35   19.30   39.80
   2   0 -34 3787.40  165.70
   2   0 -33   65.40   39.80
   2   0 -32  161.70   33.60
   2   0 -31  -22.20   28.60
   2   0 -30  444.00   42.20
   2   0 -29   19.10   34.70
   2   0 -28  270.70   32.50
   2   0 -27  -15.60   30.60
   2   0 -26 2126.40  100.00
   2   0 -25   27.40   27.60
   2   0 -24 2320.80   94.80
   2   0 -23  -19.70   21.10
   2   0 -22 1127.00   51.70
   2   0 -21  -42.60   23.00
   2   0 -20 1291.60   59.70
   2   0 -19  -56.00   29.10
   2   0 -18  539.40   36.10
   2   0 -17  -75.80   23.90
   2   0 -16 5613.30  164.80
   2   0 -15  -39.60   16.70
   2   0 -14   34.30   13.40
   2   0 -13   21.10   16.80
   2   0 -12  141.10   12.60
   2   0 -11   -8.20    8.30
   2   0 -1018814.70  330.20
   2   0  -9   12.50    6.60
   2   0  -8 3816.00   82.00
   2   0  -7    6.30    6.50
   2   0  -5   25.00    5.30
   2   0  -3   24.40    4.10
   2   0  -210022.80  216.50
   2   0  -1   40.20    3.30
   2   0   1   24.30    2.90
   2   0   2 2838.50   58.60
   2   0   3   19.60    4.30
   2   0   5    9.30    6.20
   2   0   7   10.50    7.30
   2   0   9   -2.50    7.90
   2   0  10 2369.80   57.90
   2   0  11   -0.10   15.40
   2   0  12 1402.40   57.70
   2   0  13  -11.80   14.50
   2   0  1416623.60  460.60
   2   0  15   22.10   15.50
   2   0  16 2785.80  135.60
   2   0  17   20.90   21.20
   2   0  18 2176.90   80.80
   2   0  19   -9.20   20.80
   2   0  20 1533.90   69.20
   2   0  21   -2.40   17.50
   2   0  22 1416.70   67.60
   2   0  23  -40.60   25.50
   2   0  2421543.40  629.20
   2   0  25   86.90   33.70
   2   0  2622279.10  634.10
   2   0  27   -8.70   30.80
   2   0  28   -4.10   27.40
   2   0  29   16.10   28.50
   2   0  30 1112.60   68.30
   2   0  31  -30.40   28.10
   2   0  32   71.20   27.90
   2   0  33   17.60   29.30
   2   0  34  467.90   51.10
   2   0  35    5.10   31.70
   2   1 -36 1958.40  112.70
   2   1 -35  -23.60   24.10
   2   1 -34  556.50   39.70
   2   1 -33  -40.80   22.60
   2   1 -32  209.50   27.00
   2   1 -31   91.10   28.10
   2   1 -30  700.40   39.10
   2   1 -29 2031.10   67.90
   2   1 -28 1297.10   58.40
   2   1 -27  812.80   40.40
   2   1 -26   37.20   21.50
   2   1 -25  915.40   36.00
   2   1 -24  515.00   28.40
   2   1 -23 4010.20   99.50
   2   1 -22 6190.50  135.20
   2   1 -21   37.40   13.90
   2   1 -20 2271.70   63.70
   2   1 -19 2387.90   64.60
   2   1 -1874224.20 2519.50
   2   1 -17 8864.90  214.20
   2   1 -16 8885.30  170.00
   2   1 -15 1578.20   41.00
   2   1 -14 3298.30   74.90
   2   1 -13  893.30   30.70
   2   1 -12 1959.70   47.30
   2   1 -11 5028.60   76.10
   2   1 -1011516.20  153.50
   2   1  -9 1379.70   25.30
   2   1  -815993.30  211.90
   2   1  -715244.00  205.50
   2   1  -6  724.40   15.30
   2   1  -524515.20  511.80
   2   1  -4 3986.20   58.10
   2   1  -3  145.00    4.70
   2   1  -2 3623.80   53.00
   2   1  -1 1799.30   30.90
   2   1   0  450.50    9.50
   2   1   1  330.90    7.10
   2   1   2  852.30   14.70
   2   1   4 1686.70   31.10
   2   1   5   70.60    5.60
   2   1   912154.80  159.80
   2   1  10 5928.10   88.90
   2   1  11   25.20   10.50
   2   1  1219867.00  381.30
   2   1  13 8196.30  170.60
   2   1  14 7375.30  157.40
   2   1  15 2553.30   64.20
   2   1  16  255.10   20.00
   2   1  17 4091.90  101.90
   2   1  18  193.10   18.40
   2   1  19 2372.50   64.60
   2   1  20  946.80   34.30
   2   1  21   39.00   15.90
   2   1  22   91.90   18.60
   2   1  23   66.30   19.30
   2   1  24 2224.00   68.20
   2   1  25   92.70   24.20
   2   1  26  -22.20   23.20
   2   1  27  789.40   38.90
   2   1  28  846.70   48.30
   2   1  29 1920.20   73.80
   2   1  30  181.90   27.80
   2   1  31   27.00   20.90
   2   1  32   41.70   21.20
   2   1  33   78.80   22.70
   2   1  34   22.40   23.30
   2   1  35   70.70   31.30
   2   2 -36 2617.90  133.00
   2   2 -35 1308.00   65.50
   2   2 -34 1533.40   59.60
   2   2 -33  309.90   31.70
   2   2 -32  -17.00   21.10
   2   2 -31   32.30   20.90
   2   2 -30  242.30   27.40
   2   2 -29  914.10   43.40
   2   2 -28   22.30   21.40
   2   2 -27   20.90   21.20
   2   2 -26   21.60   17.60
   2   2 -25  362.30   24.40
   2   2 -24 5839.60  135.80
   2   2 -23  587.20   29.20
   2   2 -22 3722.20   91.80
   2   2 -21 3319.20   77.10
   2   2 -20 6845.40  137.70
   2   2 -19 1494.70   44.10
   2   2 -1814520.50  290.80
   2   2 -17 1800.40   53.30
   2   2 -16 1216.00   35.20
   2   2 -1521137.10  381.60
   2   2 -14  898.70   26.60
   2   2 -1312631.20  250.80
   2   2 -12   32.20    8.90
   2   2 -11 3660.60   58.00
   2   2 -10 9101.40  125.80
   2   2  -9   95.60    6.40
   2   2  -8 3219.30   51.80
   2   2  -713514.80  182.70
   2   2  -614665.30  229.40
   2   2  -5 1271.40   22.00
   2   2  -4 2318.70   35.70
   2   2  -3 6837.80   91.50
   2   2  -2 2225.80   35.60
   2   2  -1 1099.80   18.90
   2   2   0 9417.00  175.40
   2   2   1  775.80   13.90
   2   2   2  203.30    5.30
   2   2   4 1110.70   23.00
   2   2   6 5113.30   83.70
   2   2   7 1498.50   28.80
   2   2   8  448.90   11.40
   2   2   9    7.50    5.50
   2   2  10  607.40   14.20
   2   2  1112383.40  269.40
   2   2  1212083.60  255.00
   2   2  13 1011.60   32.90
   2   2  14 7711.30  164.50
   2   2  15 4076.40   97.00
   2   2  16   10.30   15.40
   2   2  17 6023.50  139.00
   2   2  18  153.50   18.10
   2   2  19 1358.20   44.60
   2   2  20 1987.50   56.90
   2   2  21 1523.30   47.60
   2   2  22   10.20   15.60
   2   2  23 2672.60   74.40
   2   2  2422720.60  468.60
   2   2  25 8134.20  191.20
   2   2  2624298.90  502.80
   2   2  27  -15.40   23.80
   2   2  28 2359.30   83.30
   2   2  29  702.10   42.80
   2   2  30  133.30   26.60
   2   2  31  -23.90   26.10
   2   2  32  101.70   26.70
   2   2  33  251.70   27.80
   2   2  34  480.60   38.40
   2   2  35 1716.60  150.00
   2   3 -36 4486.60  181.60
   2   3 -35  159.00   30.30
   2   3 -34 3200.30   99.90
   2   3 -33  140.60   25.30
   2   3 -32   42.20   24.00
   2   3 -31  798.30   43.90
   2   3 -30  -16.50   21.90
   2   3 -29 5110.20  138.20
   2   3 -28  349.00   31.90
   2   3 -27 5200.00  129.10
   2   3 -26  160.30   22.40
   2   3 -25    1.40   19.00
   2   3 -24  735.70   34.00
   2   3 -23  629.30   32.30
   2   3 -22   40.30   16.00
   2   3 -21 3196.60   78.10
   2   3 -20  212.20   20.70
   2   3 -19 4369.10   96.30
   2   3 -18 2705.20   68.20
   2   3 -17 1364.30   44.20
   2   3 -16 1512.70   43.90
   2   3 -15  287.00   14.90
   2   3 -14    6.20   12.00
   2   3 -13 8695.40  162.90
   2   3 -12  823.10   25.10
   2   3 -11 4069.80   65.80
   2   3 -10   47.70    5.30
   2   3  -9  714.20   15.80
   2   3  -818178.80  232.70
   2   3  -7  348.40    9.30
   2   3  -4 6070.90   84.20
   2   3  -3 3590.70   50.90
   2   3  -2 9955.80  152.10
   2   3  -110998.10  237.00
   2   3   0 1218.30   19.80
   2   3   2   40.30    3.70
   2   3   4 1122.70   22.70
   2   3   5 4990.60   74.50
   2   3   613209.50  180.30
   2   3   7 3394.10   53.30
   2   3   821451.30  294.20
   2   3   914413.60  207.70
   2   3  10 4206.50   66.80
   2   3  11  629.50   25.90
   2   3  12 6763.50  146.60
   2   3  13  569.20   21.70
   2   3  14 8175.00  164.70
   2   3  15 1479.80   43.50
   2   3  16  295.60   19.70
   2   3  1714404.70  298.60
   2   3  18 2653.80   68.50
   2   3  19 5922.10  132.10
   2   3  20  368.20   22.20
   2   3  21 1032.30   36.20
   2   3  22   17.80   18.80
   2   3  23  345.00   24.80
   2   3  24 5108.30  127.20
   2   3  25 1155.60   53.20
   2   3  26 5677.70  144.10
   2   3  27 1072.10   48.50
   2   3  28  700.70   38.90
   2   3  29  166.40   25.00
   2   3  30 7724.00  197.80
   2   3  31  158.00   31.90
   2   3  32 1547.30   63.10
   2   3  33   97.40   26.80
   2   3  34  443.20   36.10
   2   3  35  621.40   54.60
   2   4 -36  -72.60   38.00
   2   4 -35  788.80   42.80
   2   4 -34   58.30   24.40
   2   4 -33   11.00   21.30
   2   4 -32  447.50   36.50
   2   4 -31   60.40   25.60
   2   4 -30  550.20   33.80
   2   4 -29  372.90   29.90
   2   4 -28 1728.80   61.20
   2   4 -27 1160.50   46.60
   2   4 -26  978.60   43.00
   2   4 -25 2650.90   79.30
   2   4 -2423174.20  439.60
   2   4 -2314420.10  279.50
   2   4 -2216995.90  321.50
   2   4 -21 1749.30   52.30
   2   4 -20  200.90   19.70
   2   4 -19  201.70   20.60
   2   4 -18 4852.10  113.70
   2   4 -17 6863.90  156.00
   2   4 -16 4734.10  104.90
   2   4 -15 9423.30  194.40
   2   4 -14   22.00   12.70
   2   4 -13 5657.70  107.70
   2   4 -12   19.70    8.80
   2   4 -11 8782.10  132.80
   2   4 -10 1085.10   21.00
   2   4  -919960.00  253.20
   2   4  -8  677.60   15.00
   2   4  -7 3685.40   55.80
   2   4  -5 3647.60   55.80
   2   4  -2 3098.40   50.60
   2   4   0 3307.80   46.70
   2   4   1  563.70   11.70
   2   4   2 1720.80   27.10
   2   4   310990.00  154.80
   2   4   4 6996.00  100.00
   2   4   521664.90  438.30
   2   4   6  143.00    6.50
   2   4   7  127.30    6.30
   2   4   8  387.90   10.00
   2   4   9  690.60   14.80
   2   4  10 2329.50   47.70
   2   4  11 8010.60  171.40
   2   4  12 6998.00  140.50
   2   4  1317279.90  312.70
   2   4  1437673.20  643.40
   2   4  15  154.10   15.20
   2   4  16 1137.60   36.40
   2   4  1716524.60  320.10
   2   4  18 3112.30   72.30
   2   4  19 4409.10   99.50
   2   4  20 3765.50   86.40
   2   4  21 1304.70   45.50
   2   4  22  886.60   38.80
   2   4  23  511.10   29.80
   2   4  24 3161.70   89.20
   2   4  25 1370.30   51.30
   2   4  26  616.20   32.70
   2   4  27 2196.70   70.60
   2   4  28   81.80   24.30
   2   4  29 1790.10   67.90
   2   4  30 1278.40   58.00
   2   4  31 6928.10  186.70
   2   4  32  998.10   56.90
   2   4  33 1230.30   52.90
   2   4  34   72.30   24.30
   2   4  35  422.90   55.90
   2   5 -36  -40.20   40.70
   2   5 -35    2.10   22.60
   2   5 -34   44.50   21.90
   2   5 -33  622.80   37.20
   2   5 -32   96.70   23.70
   2   5 -31  327.20   29.00
   2   5 -30   74.60   18.80
   2   5 -29  244.10   26.50
   2   5 -28   48.10   28.30
   2   5 -27  679.40   33.40
   2   5 -26  760.30   36.00
   2   5 -25 4013.90   96.80
   2   5 -2413625.70  272.80
   2   5 -23 2583.70   71.50
   2   5 -2236907.00  670.20
   2   5 -21  940.10   35.80
   2   5 -20 5657.60  128.70
   2   5 -19 9939.70  207.40
   2   5 -18  160.00   17.90
   2   5 -17 1267.30   39.90
   2   5 -16 8887.70  182.20
   2   5 -15  128.10   14.20
   2   5 -14 2278.20   57.50
   2   5 -13 2935.30   69.10
   2   5 -12 2223.40   48.10
   2   5 -11 6404.80  101.00
   2   5 -1013880.40  198.70
   2   5  -9 2181.30   36.40
   2   5  -8 2353.30   39.70
   2   5  -720285.60  282.50
   2   5  -4  280.70    9.00
   2   5  -3 6079.00   87.80
   2   5  -2 1403.20   24.80
   2   5  -112338.30  176.00
   2   5   0 2663.80   44.20
   2   5   110594.50  152.10
   2   5   2   66.30    4.10
   2   5   3 1134.10   21.00
   2   5   4 1088.50   20.20
   2   5   5   30.20    4.40
   2   5   6 9859.70  132.80
   2   5   7 2113.40   34.50
   2   5   8  589.10   13.20
   2   5   914589.60  191.10
   2   5  1034460.50  640.10
   2   5  11  910.30   29.40
   2   5  1338784.80  925.00
   2   5  1526355.80  474.00
   2   5  16  179.40   18.10
   2   5  17 1645.10   45.70
   2   5  18  102.00   14.10
   2   5  19   18.60   13.80
   2   5  20 1033.60   33.30
   2   5  21  174.10   19.40
   2   5  22  764.30   34.90
   2   5  23   11.20   19.70
   2   5  24  -21.40   17.40
   2   5  25  189.50   24.90
   2   5  26  206.20   24.50
   2   5  27  233.20   25.20
   2   5  28 1731.20   68.90
   2   5  29  233.60   28.60
   2   5  30   -6.80   25.20
   2   5  31  317.40   29.60
   2   5  32   85.40   27.60
   2   5  33   25.50   23.30
   2   5  34   86.30   26.80
   2   5  35  708.20   78.60
   2   6 -35   54.10   24.00
   2   6 -34  754.40   42.70
   2   6 -33  104.70   23.00
   2   6 -32   24.30   23.80
   2   6 -31  200.10   26.80
   2   6 -30  733.00   37.50
   2   6 -29 1242.40   52.60
   2   6 -28 1237.00   48.60
   2   6 -27  143.30   24.80
   2   6 -26  316.00   26.80
   2   6 -25 4291.10  108.10
   2   6 -24 4423.90  108.70
   2   6 -23  707.30   33.90
   2   6 -22 5894.80  135.00
   2   6 -21  358.70   23.90
   2   6 -20 7054.90  150.60
   2   6 -19 2181.00   61.40
   2   6 -18 1889.40   51.90
   2   6 -17  560.80   23.40
   2   6 -16  391.50   18.60
   2   6 -15  766.40   28.50
   2   6 -14  261.40   16.10
   2   6 -13 5297.00  115.00
   2   6 -12 2881.50   60.70
   2   6 -11 4784.00   75.00
   2   6 -10 5027.00   77.20
   2   6  -9 1554.50   29.20
   2   6  -810346.10  141.70
   2   6  -725673.90  410.70
   2   6  -5 3641.40   62.00
   2   6  -318493.50  272.90
   2   6  -2 4130.90   58.30
   2   6  -1  266.20    6.80
   2   6   0 8132.40  132.60
   2   6   1 6757.70   99.40
   2   6   2 1289.20   22.10
   2   6   3 9439.30  126.00
   2   6   4 1415.70   23.10
   2   6   5 2479.00   38.90
   2   6   6 6696.50   94.80
   2   6   7  831.60   17.00
   2   6   819405.60  252.20
   2   6   9   66.00    7.40
   2   6  10  424.00   17.10
   2   6  11 1522.50   37.80
   2   6  1215617.00  356.90
   2   6  13  382.20   20.50
   2   6  14 2910.40   70.40
   2   6  15 3849.90   88.90
   2   6  16 1880.80   54.50
   2   6  17 1714.50   49.20
   2   6  18  345.60   20.10
   2   6  19 2065.50   52.70
   2   6  20 4359.70   98.50
   2   6  21   49.20   16.50
   2   6  22   49.30   17.40
   2   6  23  422.90   29.50
   2   6  24 2413.90   73.00
   2   6  25  105.50   18.00
   2   6  26 1728.20   61.80
   2   6  27  -14.40   20.70
   2   6  28 5044.80  141.70
   2   6  29   58.10   24.90
   2   6  30 2500.20   83.50
   2   6  31   82.80   25.50
   2   6  32    8.10   22.30
   2   6  33  -35.90   20.10
   2   6  34  379.50   35.20
   2   7 -35   44.10   24.30
   2   7 -34   67.90   25.90
   2   7 -33 1133.10   51.80
   2   7 -32  109.50   23.50
   2   7 -31  767.20   39.50
   2   7 -30    1.90   20.30
   2   7 -29 1603.40   61.10
   2   7 -28   12.30   19.60
   2   7 -27 5389.00  134.30
   2   7 -26   -0.70   23.30
   2   7 -25  438.40   30.50
   2   7 -24 9425.50  204.80
   2   7 -23 1892.10   62.20
   2   7 -2220020.60  383.60
   2   7 -21  703.30   32.30
   2   7 -20  927.80   35.30
   2   7 -19 2075.30   58.00
   2   7 -18 6037.90  134.00
   2   7 -17  756.10   29.70
   2   7 -1612795.30  246.80
   2   7 -15   17.60   11.30
   2   7 -14 1061.00   34.20
   2   7 -13  779.40   25.10
   2   7 -12  265.60   12.60
   2   7 -11   26.60    6.50
   2   7 -10 8858.80  127.20
   2   7  -932986.50  472.80
   2   7  -8 2536.10   45.80
   2   7  -7  313.20   10.90
   2   7  -639817.40  974.50
   2   7  -531045.10 1137.60
   2   7  -418861.90  249.90
   2   7  -3 1832.40   29.00
   2   7  -210145.80  141.00
   2   7  -113079.20  191.00
   2   7   0 3775.10   62.70
   2   7   1 1922.40   37.00
   2   7   2 3284.80   48.80
   2   7   3 3826.60   56.50
   2   7   4  804.10   16.20
   2   7   5 6673.70   90.30
   2   7   6 3376.40   52.10
   2   7   7 6224.80   89.70
   2   7   8 6083.90   90.90
   2   7   9   94.70    8.40
   2   7  10 7548.90  146.30
   2   7  1114262.40  255.70
   2   7  13 2693.80   72.40
   2   7  1430296.80  581.60
   2   7  15 1572.60   46.30
   2   7  16 2401.60   66.60
   2   7  17 1905.50   55.40
   2   7  18  618.00   26.90
   2   7  19 9305.10  191.10
   2   7  20  880.20   34.20
   2   7  21 1841.60   58.60
   2   7  22 2295.40   62.30
   2   7  23 3382.30   88.90
   2   7  24  565.00   30.50
   2   7  25  847.00   40.20
   2   7  26    8.90   22.10
   2   7  27 4328.10  120.90
   2   7  28   -1.50   22.00
   2   7  29   37.70   22.50
   2   7  30   24.00   21.80
   2   7  31 1859.50   74.80
   2   7  32   49.40   23.50
   2   7  33  842.60   50.90
   2   7  34    8.80   23.50
   2   8 -35  192.00   31.00
   2   8 -34 1327.40   61.70
   2   8 -33   66.30   24.30
   2   8 -32   42.60   24.70
   2   8 -31  608.10   36.90
   2   8 -30  296.80   29.30
   2   8 -29 2085.30   72.70
   2   8 -28   84.50   23.10
   2   8 -27 1601.00   56.50
   2   8 -26  700.60   38.80
   2   8 -25 5342.70  137.50
   2   8 -24 7069.00  161.60
   2   8 -23 1340.00   53.70
   2   8 -22 8259.30  178.20
   2   8 -21  673.50   28.90
   2   8 -20  250.20   18.30
   2   8 -19   18.50   14.40
   2   8 -18 1313.60   41.00
   2   8 -17 3219.80   73.30
   2   8 -16 2180.00   53.70
   2   8 -1516806.10  303.90
   2   8 -14 1911.80   49.10
   2   8 -13 1237.20   34.40
   2   8 -12 2810.00   58.90
   2   8 -11 5368.30   83.30
   2   8 -10 2187.00   36.70
   2   8  -9  774.50   16.30
   2   8  -810743.30  152.00
   2   8  -729178.20  414.40
   2   8  -613695.60  179.20
   2   8  -5 2102.90   33.10
   2   8  -4 5786.80   81.50
   2   8  -3 4370.10   63.20
   2   8  -2  813.40   14.20
   2   8  -1  867.70   19.20
   2   8   0   56.30    6.10
   2   8   1  707.40   17.30
   2   8   2  978.50   17.50
   2   8   3 2157.00   34.90
   2   8   4 3064.60   47.10
   2   8   5 9867.10  141.90
   2   8   6 8120.00  113.90
   2   8   7  611.10   13.80
   2   8   8 1444.30   29.30
   2   8   9 1109.30   24.70
   2   8  10   70.10    9.50
   2   8  11 1615.20   40.30
   2   8  12  374.10   18.50
   2   8  13  414.40   19.70
   2   8  14 1120.90   38.00
   2   8  1511679.80  242.60
   2   8  16   13.00   14.70
   2   8  17 3541.30   93.00
   2   8  18   89.10   16.20
   2   8  19 5490.50  126.60
   2   8  20 4410.70  105.50
   2   8  21   68.10   21.70
   2   8  22 1257.80   49.90
   2   8  23 1610.30   56.50
   2   8  24 5694.90  139.20
   2   8  25  330.00   27.90
   2   8  26 6161.10  164.90
   2   8  27  -48.40   22.10
   2   8  28   41.10   21.00
   2   8  29 1017.30   44.90
   2   8  30  804.20   40.00
   2   8  31 1448.40   60.70
   2   8  32  303.70   36.70
   2   8  33   57.40   25.20
   2   8  34  136.10   37.20
   2   9 -34  124.80   27.10
   2   9 -33 1468.10   59.50
   2   9 -32  421.10   33.20
   2   9 -31  -16.70   20.80
   2   9 -30  291.70   27.40
   2   9 -29   19.10   24.90
   2   9 -28  678.40   39.80
   2   9 -27  837.40   43.00
   2   9 -26 3182.60   91.70
   2   9 -25  385.60   25.80
   2   9 -24  211.90   20.20
   2   9 -23   30.40   16.80
   2   9 -22   84.00   17.70
   2   9 -21 2423.60   65.00
   2   9 -20  517.10   25.80
   2   9 -19  492.60   24.80
   2   9 -1810432.20  206.80
   2   9 -17  -15.20   14.20
   2   9 -16 5146.30  108.90
   2   9 -15 1100.10   30.70
   2   9 -14 1588.10   43.60
   2   9 -13  128.40   14.30
   2   9 -12 9074.20  177.90
   2   9 -11 7116.60  111.10
   2   9 -10 1621.30   31.30
   2   9  -9 1997.80   35.80
   2   9  -8  362.60   10.80
   2   9  -7 7777.80  113.20
   2   9  -6 2149.20   36.50
   2   9  -5 5163.00   89.80
   2   9  -4 7378.90  101.60
   2   9  -316343.90  212.10
   2   9  -2  333.90   12.00
   2   9  -110523.90  173.80
   2   9   0 7188.70  124.70
   2   9   1   64.40    7.30
   2   9   2 9554.30  154.50
   2   9   3 2171.20   34.70
   2   9   4 5529.40   78.50
   2   9   5 5146.70   75.10
   2   9   6  454.70   12.20
   2   9   7   75.10    6.90
   2   9   811489.60  177.00
   2   9   9 3679.00   66.00
   2   9  10 3408.40   71.70
   2   9  11 8580.10  153.10
   2   9  12  105.60   12.20
   2   9  13  560.50   21.20
   2   9  14 3578.20   84.00
   2   9  15 2907.30   76.50
   2   9  16 8230.20  186.20
   2   9  17 1064.10   35.90
   2   9  18  441.20   22.90
   2   9  19 1500.10   48.40
   2   9  20 6074.50  140.20
   2   9  21   33.50   19.70
   2   9  22 3253.80   90.30
   2   9  23 2052.90   63.40
   2   9  24  -42.60   19.00
   2   9  25   26.50   21.50
   2   9  26 5609.00  145.30
   2   9  27  716.70   42.90
   2   9  28 1460.30   56.10
   2   9  29  376.00   29.70
   2   9  30  928.60   46.80
   2   9  31 1693.60   69.40
   2   9  32  248.80   29.90
   2   9  33  538.80   36.50
   2  10 -34  969.70   56.60
   2  10 -33  440.80   33.90
   2  10 -32  924.60   49.80
   2  10 -31  118.70   22.90
   2  10 -30 1537.70   62.10
   2  10 -29 3026.80   97.30
   2  10 -28 1029.60   46.70
   2  10 -27 1492.20   54.70
   2  10 -26  172.50   22.40
   2  10 -25 1051.60   44.50
   2  10 -24  601.50   33.60
   2  10 -23 2557.00   70.20
   2  10 -22  885.80   37.70
   2  10 -21  577.30   28.20
   2  10 -20 2366.70   67.30
   2  10 -19    0.40   15.90
   2  10 -18   28.80   14.90
   2  10 -17  141.70   17.30
   2  10 -16 7351.70  185.60
   2  10 -15  399.00   21.60
   2  10 -14  422.60   20.50
   2  10 -13 2807.10   68.40
   2  10 -12 1587.20   44.10
   2  10 -11 1227.60   28.20
   2  10 -10  129.60    8.40
   2  10  -9 1688.70   32.00
   2  10  -8 4180.80   65.90
   2  10  -713382.10  201.30
   2  10  -6 1371.20   24.50
   2  10  -5   23.90    4.60
   2  10  -4 3580.50   56.70
   2  10  -315823.30  217.40
   2  10  -2 3475.20   71.30
   2  10  -1   27.40    7.10
   2  10   0 6755.40  117.20
   2  10   111457.70  183.80
   2  10   2 3788.10   69.40
   2  10   3   71.30    4.60
   2  10   4 9211.80  143.70
   2  10   5 3149.30   58.60
   2  10   642873.70  751.70
   2  10   7 6617.30  107.80
   2  10   8 4109.20   76.10
   2  10   9  988.70   25.50
   2  10  10 2641.60   58.80
   2  10  11 7953.30  145.50
   2  10  12   75.10   12.90
   2  10  1311101.90  216.00
   2  10  14 2232.10   56.50
   2  10  15 1353.20   41.50
   2  10  16 2106.00   60.80
   2  10  17 1580.40   51.00
   2  10  18    8.90   14.70
   2  10  19 1875.90   54.30
   2  10  20 1108.80   40.70
   2  10  21 2522.10   79.20
   2  10  22   52.10   19.40
   2  10  23 2364.20   78.10
   2  10  24 4274.60  114.40
   2  10  25 2360.50   79.80
   2  10  2611726.50  272.50
   2  10  27 4931.50  132.50
   2  10  28  200.20   25.50
   2  10  29   51.20   19.10
   2  10  30  813.70   42.00
   2  10  31  369.60   34.90
   2  10  32  115.10   24.40
   2  10  33  -17.60   27.00
   2  11 -33  284.10   31.30
   2  11 -32   20.90   24.10
   2  11 -31  574.80   37.10
   2  11 -30  186.70   26.50
   2  11 -29  594.30   34.20
   2  11 -28  422.70   34.00
   2  11 -27   93.40   22.10
   2  11 -26  339.60   29.00
   2  11 -25  629.30   32.10
   2  11 -24 1445.10   49.90
   2  11 -23  434.40   27.60
   2  11 -22 3606.20   92.30
   2  11 -21 2315.10   68.40
   2  11 -20  104.60   19.00
   2  11 -19 2465.10   75.10
   2  11 -1819695.10  388.60
   2  11 -17 8765.20  181.70
   2  11 -16 6570.60  147.10
   2  11 -1519531.50  364.90
   2  11 -14 3655.50   82.90
   2  11 -13 4705.50  101.20
   2  11 -1226727.60  568.50
   2  11 -1142963.90  892.20
   2  11 -1020371.30  306.80
   2  11  -910925.40  160.30
   2  11  -8 2997.20   49.10
   2  11  -7 2933.80   49.30
   2  11  -6   99.10    6.40
   2  11  -513672.90  183.00
   2  11  -415044.40  206.50
   2  11  -3  762.30   14.60
   2  11  -2 3853.60   75.00
   2  11  -1 6889.50  128.10
   2  11   015878.60  265.80
   2  11   1 6876.50  126.60
   2  11   219232.10  314.50
   2  11   3   43.20    7.70
   2  11   4 1130.60   22.00
   2  11   518958.90  276.30
   2  11   6 9064.00  163.00
   2  11   7 5309.50   88.30
   2  11   826633.70  380.30
   2  11   914644.40  244.40
   2  11  10  207.10   13.40
   2  11  11 6073.20  114.90
   2  11  12 8681.40  170.20
   2  11  13  530.50   23.50
   2  11  14 1096.00   34.20
   2  11  15   29.20   14.10
   2  11  16  367.70   22.20
   2  11  17 3742.70   88.30
   2  11  18 1762.50   54.00
   2  11  19 2648.80   69.50
   2  11  20 1520.50   44.90
   2  11  21  386.50   25.60
   2  11  22  908.80   38.30
   2  11  23 1321.60   51.10
   2  11  24 3562.70  102.70
   2  11  25  -28.60   20.70
   2  11  26   66.00   22.80
   2  11  27   81.50   24.70
   2  11  28 2112.60   71.60
   2  11  29  435.30   27.20
   2  11  30  381.00   32.50
   2  11  31  -23.60   23.30
   2  11  32  620.80   35.40
   2  12 -33 1865.60   78.30
   2  12 -32  333.60   35.20
   2  12 -31  592.70   44.50
   2  12 -30   66.60   24.80
   2  12 -29   55.10   21.40
   2  12 -28  -12.80   20.70
   2  12 -27 1218.50   52.60
   2  12 -26  337.60   27.40
   2  12 -25  135.80   22.60
   2  12 -24  227.00   24.80
   2  12 -23  791.30   36.50
   2  12 -22   36.00   20.90
   2  12 -21 6692.00  154.00
   2  12 -20   81.50   17.40
   2  12 -19 1220.40   41.30
   2  12 -18   66.80   17.20
   2  12 -17  131.20   18.90
   2  12 -16  635.00   27.90
   2  12 -15 3531.50   84.10
   2  12 -14  118.10   13.90
   2  12 -13  423.90   20.20
   2  12 -12 2260.40   56.50
   2  12 -11 8117.00  146.00
   2  12 -1021176.90  316.90
   2  12  -9  748.30   18.10
   2  12  -8   58.10    6.70
   2  12  -7   77.00    6.60
   2  12  -616570.00  224.90
   2  12  -5  190.20    7.50
   2  12  -413245.90  184.20
   2  12  -3  426.70   15.10
   2  12  -2 1193.40   30.20
   2  12  -113449.70  227.70
   2  12   033991.90  537.70
   2  12   143712.50  879.10
   2  12   212807.10  215.10
   2  12   3 4787.50  104.40
   2  12   4 2135.00   36.70
   2  12   535187.30  530.20
   2  12   621602.90  306.80
   2  12   717120.60  274.10
   2  12   814976.10  221.80
   2  12   9 3805.20   74.30
   2  12  10   42.90    8.40
   2  12  11 4692.30   91.80
   2  12  12  438.90   23.00
   2  12  13  211.90   15.80
   2  12  14 1728.70   49.50
   2  12  15  189.80   18.20
   2  12  16  220.30   18.70
   2  12  17 1763.30   52.60
   2  12  18  935.20   31.80
   2  12  19  -25.70   15.10
   2  12  20 1488.80   47.90
   2  12  21 3265.80   86.90
   2  12  22 2855.90   78.20
   2  12  23 9089.40  210.60
   2  12  24 4829.80  130.60
   2  12  25 1305.60   56.70
   2  12  26 2631.70   87.30
   2  12  27 2979.70   94.60
   2  12  28   67.10   21.50
   2  12  29 1282.60   56.40
   2  12  30   40.50   27.90
   2  12  31   31.80   19.70
   2  12  32  559.30   41.40
   2  13 -32  656.80   44.80
   2  13 -31   22.00   22.50
   2  13 -30  491.80   37.50
   2  13 -29  392.40   29.60
   2  13 -28   20.20   18.60
   2  13 -27  173.00   24.00
   2  13 -26 1582.90   59.40
   2  13 -25  510.80   29.70
   2  13 -24  347.70   25.20
   2  13 -23  263.60   23.40
   2  13 -22  710.00   35.40
   2  13 -21   82.70   19.10
   2  13 -20   10.10   17.10
   2  13 -19 1212.90   45.40
   2  13 -18 5377.30  132.50
   2  13 -1725396.10  481.10
   2  13 -16 8970.60  197.40
   2  13 -1510238.30  205.40
   2  13 -14 4021.60   87.80
   2  13 -13 4087.40   85.50
   2  13 -12   90.30   13.60
   2  13 -11 3581.50   71.70
   2  13 -10   90.60    8.60
   2  13  -9 1359.70   30.00
   2  13  -8 3867.40   64.60
   2  13  -7 7688.70  112.30
   2  13  -6 3767.30   60.30
   2  13  -5 8858.40  128.20
   2  13  -4   18.20    4.10
   2  13  -3 5183.10   95.50
   2  13  -2 9642.40  169.10
   2  13  -1   46.70    7.20
   2  13   012497.10  245.30
   2  13   1  115.80    9.10
   2  13   2  441.90   16.90
   2  13   3 7167.00  143.70
   2  13   4 6679.20  139.50
   2  13   5 8967.40  133.30
   2  13   633494.40  454.40
   2  13   737144.80  550.00
   2  13   825886.20  456.70
   2  13   9  263.90   12.30
   2  13  10  584.20   20.40
   2  13  11 3193.50   68.70
   2  13  12 1677.40   45.90
   2  13  13  480.60   21.70
   2  13  14   84.60   14.30
   2  13  15 2347.80   75.20
   2  13  16  117.40   16.60
   2  13  17  593.10   29.10
   2  13  18  597.30   30.30
   2  13  19  -11.70   13.00
   2  13  20 3509.00   92.20
   2  13  21  108.30   21.00
   2  13  22  838.00   36.40
   2  13  23 3115.20   82.30
   2  13  24   33.90   23.30
   2  13  25 2732.30   90.40
   2  13  26  -25.80   20.00
   2  13  27 4365.30  119.70
   2  13  28    6.80   23.00
   2  13  29 3654.10  114.20
   2  13  30  117.20   22.70
   2  13  31  335.90   34.40
   2  14 -31  102.10   24.80
   2  14 -30  240.40   27.80
   2  14 -29  538.00   35.10
   2  14 -28  120.40   21.70
   2  14 -27   22.20   19.50
   2  14 -26 1846.90   65.80
   2  14 -25  638.90   35.90
   2  14 -24 5459.40  141.40
   2  14 -23   14.00   17.50
   2  14 -22  956.60   40.90
   2  14 -21 5606.30  137.50
   2  14 -20 2356.90   71.10
   2  14 -19  198.40   22.00
   2  14 -18 9875.10  214.20
   2  14 -17  291.30   21.70
   2  14 -16 9513.90  214.10
   2  14 -15 5646.60  122.40
   2  14 -14  199.40   17.40
   2  14 -13 3920.40   87.40
   2  14 -12   29.80   12.80
   2  14 -11  101.80   11.40
   2  14 -10  430.10   15.00
   2  14  -9 1104.70   26.10
   2  14  -8 2187.60   43.20
   2  14  -7 1168.30   27.40
   2  14  -6  208.00    8.90
   2  14  -5  375.00   10.60
   2  14  -4 4734.80   91.30
   2  14  -3  275.00   12.70
   2  14  -2 2314.70   52.80
   2  14  -1 2280.80   52.60
   2  14   0 1503.10   39.00
   2  14   1  498.40   17.50
   2  14   2  827.30   25.20
   2  14   3  551.60   19.60
   2  14   4  931.70   27.90
   2  14   510855.60  201.50
   2  14   6 2380.10   43.20
   2  14   7  261.50   10.30
   2  14   8 5983.90   99.00
   2  14   9 2888.70   62.80
   2  14  10 1146.90   36.40
   2  14  11 9032.00  166.70
   2  14  12 1548.60   43.70
   2  14  13  122.70   16.70
   2  14  1419895.30  377.00
   2  14  15 1221.10   43.20
   2  14  16 6545.80  149.80
   2  14  17  796.70   32.40
   2  14  18  551.50   31.40
   2  14  19 4075.50  117.50
   2  14  20   33.20   19.00
   2  14  21 1408.30   48.00
   2  14  22 1351.90   46.60
   2  14  23 3131.50   96.30
   2  14  24 3920.80  118.60
   2  14  25 3031.70   99.60
   2  14  26 2576.10   83.20
   2  14  27  644.70   39.80
   2  14  28 1943.80   73.10
   2  14  29  366.80   33.00
   2  14  30  426.00   33.30
   2  15 -30  215.00   30.50
   2  15 -29  664.20   38.40
   2  15 -28  392.20   30.10
   2  15 -27  187.20   23.40
   2  15 -26  529.60   30.70
   2  15 -25   93.90   20.80
   2  15 -24  255.90   25.10
   2  15 -23  614.80   31.70
   2  15 -22    3.40   16.90
   2  15 -21  533.30   31.30
   2  15 -20  467.10   30.10
   2  15 -19 4354.40  113.40
   2  15 -18 4543.50  108.00
   2  15 -17   18.40   14.50
   2  15 -16  210.30   19.10
   2  15 -15   46.90   14.30
   2  15 -14 4916.60  112.50
   2  15 -13 4640.40  109.80
   2  15 -12  765.60   29.20
   2  15 -11 1558.10   38.30
   2  15 -10  383.40   15.10
   2  15  -9  596.00   17.80
   2  15  -816398.60  249.20
   2  15  -7 1492.80   30.20
   2  15  -610182.60  157.30
   2  15  -5   52.30    9.20
   2  15  -4 9136.10  175.80
   2  15  -3  472.30   17.90
   2  15  -213986.10  255.30
   2  15  -1  610.20   19.50
   2  15   0 3813.20   82.40
   2  15   1 1342.30   43.30
   2  15   2  115.50   10.30
   2  15   3 4210.10   92.60
   2  15   4 7767.10  160.10
   2  15   5  182.80   12.60
   2  15   6 1526.70   27.70
   2  15   7  205.80    9.00
   2  15   8   63.20    7.10
   2  15   914085.40  252.40
   2  15  10  385.80   21.10
   2  15  11 2341.80   63.10
   2  15  12  861.80   31.00
   2  15  13 5456.70  117.40
   2  15  14 5845.00  131.80
   2  15  15 3773.20  101.20
   2  15  16 3002.00   80.50
   2  15  17  653.80   30.80
   2  15  18 3643.20   95.40
   2  15  19   95.30   18.20
   2  15  20  640.80   31.90
   2  15  21  255.10   22.80
   2  15  22  -27.60   17.50
   2  15  23  509.40   32.20
   2  15  24 1607.60   63.10
   2  15  25   43.90   17.90
   2  15  26  897.10   50.40
   2  15  27  384.30   35.30
   2  15  28  383.60   41.80
   2  15  29  -21.40   22.90
   2  16 -30   18.50   24.90
   2  16 -29 1388.20   87.50
   2  16 -28   15.50   34.90
   2  16 -27    8.90   21.60
   2  16 -26 4369.50  129.60
   2  16 -25 4631.70  137.30
   2  16 -24 7213.40  182.80
   2  16 -23 4077.50  119.70
   2  16 -22  125.20   19.30
   2  16 -21   79.60   18.60
   2  16 -20   56.10   20.20
   2  16 -19 2796.90   79.20
   2  16 -18   38.70   15.80
   2  16 -17 1772.20   54.30
   2  16 -16   35.10   13.20
   2  16 -15   23.20   14.10
   2  16 -14 1254.20   40.20
   2  16 -13    4.90   12.60
   2  16 -12  751.20   27.70
   2  16 -11  170.10   15.30
   2  16 -10 4472.20   98.20
   2  16  -9 5757.40   95.50
   2  16  -8  404.00   14.00
   2  16  -710629.90  164.60
   2  16  -6 6420.80   99.20
   2  16  -5  761.30   24.40
   2  16  -419045.80  345.90
   2  16  -327425.50  477.60
   2  16  -2 7457.80  146.60
   2  16  -1 9570.80  183.70
   2  16   0 9729.40  218.30
   2  16   1  812.50   25.10
   2  16   2   22.90    7.80
   2  16   3 1005.90   30.70
   2  16   4 6427.70  135.30
   2  16   5 1259.10   35.60
   2  16   6  532.10   22.50
   2  16   7 1997.60   44.10
   2  16   8   57.30   10.50
   2  16   9  228.50   16.70
   2  16  10   27.00   11.10
   2  16  11 1214.10   40.50
   2  16  12  156.60   16.40
   2  16  13 1630.60   52.10
   2  16  1414714.60  297.10
   2  16  15 3657.20   96.80
   2  16  16 5090.30  127.40
   2  16  17  252.80   20.20
   2  16  18  273.30   23.30
   2  16  19 3365.70   93.40
   2  16  20   14.20   16.00
   2  16  21   71.10   18.20
   2  16  22  218.70   27.20
   2  16  23   40.00   20.20
   2  16  24  125.20   21.10
   2  16  25 1056.50   50.70
   2  16  26  184.80   28.90
   2  16  27  486.80   38.10
   2  16  28  -34.50   18.30
   2  16  29  586.10   39.00
   2  17 -28  -19.40   64.30
   2  17 -27  533.90   49.70
   2  17 -26   78.30   34.90
   2  17 -25  766.90   56.90
   2  17 -24 3134.50  114.00
   2  17 -23  595.00   41.60
   2  17 -22 4792.50  157.60
   2  17 -21 2282.70   82.40
   2  17 -20 1187.80   48.00
   2  17 -19 2656.40   79.10
   2  17 -18  676.90   35.10
   2  17 -17  186.50   19.20
   2  17 -16  443.80   27.60
   2  17 -15 2825.00   80.20
   2  17 -14  868.50   35.70
   2  17 -13   28.30   11.80
   2  17 -12  282.40   17.80
   2  17 -11 4414.00  102.20
   2  17 -10  418.80   18.30
   2  17  -9 1609.50   42.50
   2  17  -8 1377.90   39.60
   2  17  -711282.50  209.40
   2  17  -6 3538.30   91.60
   2  17  -5 1182.90   38.50
   2  17  -4  387.40   15.90
   2  17  -3  474.90   16.20
   2  17  -2   87.90    8.00
   2  17  -1  146.70   13.20
   2  17   0  432.30   16.40
   2  17   1  978.70   29.30
   2  17   2   78.10    9.50
   2  17   3 1414.40   40.30
   2  17   4 1691.00   52.90
   2  17   5 1928.50   59.10
   2  17   6  147.50   16.60
   2  17   7  876.40   39.50
   2  17   8  236.30   21.80
   2  17   9 3750.70  104.10
   2  17  10  460.40   29.30
   2  17  11  259.40   21.70
   2  17  12 9115.20  218.10
   2  17  1311183.50  261.90
   2  17  1414200.10  338.30
   2  17  1511075.10  291.10
   2  17  16 4348.10  134.90
   2  17  17 2737.20   93.30
   2  17  18 1762.40   68.80
   2  17  19 4496.40  142.20
   2  17  20  472.20   31.30
   2  17  21  218.20   24.80
   2  17  22 1137.80   59.50
   2  17  23   13.20   18.50
   2  17  24  698.20   42.80
   2  17  25  391.10   35.20
   2  17  26  213.10   28.60
   2  17  27  271.50   30.30
   2  17  28   57.00   19.60
   2  18 -27  413.70   63.30
   2  18 -26 2946.20  220.80
   2  18 -25 2616.00  193.00
   2  18 -24  303.00   66.10
   2  18 -23   31.10   50.20
   2  18 -22  110.30   31.50
   2  18 -21  163.40   31.50
   2  18 -20   98.30   30.10
   2  18 -19  508.50   46.70
   2  18 -18  547.40   46.00
   2  18 -17  414.30   36.60
   2  18 -16   -2.80   14.90
   2  18 -15  323.80   25.70
   2  18 -14  106.70   27.40
   2  18 -13  906.30   48.70
   2  18 -12  511.00   34.90
   2  18 -11 5009.50  165.20
   2  18 -10  363.60   32.90
   2  18  -9  788.80   41.90
   2  18  -8 1404.10   61.90
   2  18  -7 3496.80  117.00
   2  18  -6 7670.70  228.70
   2  18  -5  424.30   33.30
   2  18  -4 7418.60  225.50
   2  18  -318125.40  490.30
   2  18  -2 2781.90   70.00
   2  18  -1    4.70    6.80
   2  18   0 2978.10   78.20
   2  18   1 5998.10  138.60
   2  18   2 1689.40   52.30
   2  18   3 1910.10   58.90
   2  18   4   24.20   10.80
   2  18   5  124.90   13.70
   2  18   6 2542.20   77.70
   2  18   7  223.70   19.90
   2  18   8 3634.50  109.80
   2  18   9  518.70   29.60
   2  18  10  168.30   19.70
   2  18  11 1023.20   42.20
   2  18  12 4795.20  137.60
   2  18  13    6.50   13.40
   2  18  14  229.80   24.40
   2  18  15 2848.70   95.00
   2  18  16 2573.10   90.70
   2  18  17 1675.70   68.50
   2  18  18 4707.80  147.00
   2  18  19  638.40   39.40
   2  18  20  583.50   39.80
   2  18  21  389.30   33.30
   2  18  22  932.20   48.90
   2  18  23  892.80   45.90
   2  18  24 1540.80   72.70
   2  18  25  213.30   28.80
   2  18  26  121.90   28.40
   2  18  27  129.90   31.20
   2  19 -26  118.30   52.00
   2  19 -25   13.40   43.80
   2  19 -24  222.70   61.20
   2  19 -23 1186.20  129.00
   2  19 -22   64.50   50.40
   2  19 -21 2996.50  190.30
   2  19 -20  131.80   46.30
   2  19 -19  179.50   50.70
   2  19 -18 2578.70  109.60
   2  19 -17  145.40   30.80
   2  19 -16 2200.60  104.90
   2  19 -15   24.70   22.30
   2  19 -14  179.90   27.80
   2  19 -13  160.00   27.90
   2  19 -12  377.50   37.90
   2  19 -11  355.10   30.10
   2  19 -10 2836.80  114.70
   2  19  -9 8618.30  250.90
   2  19  -8 1543.70   70.50
   2  19  -7 5086.50  161.60
   2  19  -6  213.30   26.90
   2  19  -5   71.90   19.50
   2  19  -4  633.70   36.00
   2  19  -3 2929.20  108.30
   2  19  -2   63.40   25.60
   2  19  -1 5860.70  184.90
   2  19   0 2404.80   93.00
   2  19   1 1264.50   62.60
   2  19   2 1008.30   58.60
   2  19   3 2040.90   87.20
   2  19   4   79.00   24.90
   2  19   5  340.90   36.40
   2  19   6 1603.70   77.70
   2  19   7 1621.20   74.80
   2  19   8 1100.30   61.00
   2  19   9  182.10   26.80
   2  19  10  197.10   30.30
   2  19  11 3529.00  127.50
   2  19  12   64.10   21.40
   2  19  13  146.00   25.70
   2  19  14  389.80   38.40
   2  19  15 1916.80   99.60
   2  19  16 4959.60  187.00
   2  19  17  337.10   37.30
   2  19  18 4387.00  181.70
   2  19  19  646.60   48.80
   2  19  20 1585.90   81.20
   2  19  21  103.90   30.60
   2  19  22  -22.70   26.30
   2  19  23 2137.20  113.30
   2  19  24  881.10   65.90
   2  19  25  162.20   34.30
   2  20 -25 1356.30  144.20
   2  20 -24  289.10   77.40
   2  20 -23  238.00   61.30
   2  20 -22   58.40   57.10
   2  20 -21  137.50   46.20
   2  20 -20  456.40   77.90
   2  20 -19 2123.70  161.40
   2  20 -18  -51.40   58.70
   2  20 -17 2262.60  153.80
   2  20 -16 1322.80  115.10
   2  20 -15   40.50   28.20
   2  20 -14  286.00   37.40
   2  20 -13 5236.00  209.00
   2  20 -12   48.00   20.70
   2  20 -11 1323.80   66.70
   2  20 -10 1141.00   63.20
   2  20  -9  329.20   27.00
   2  20  -8 2100.30   88.20
   2  20  -7  177.10   24.80
   2  20  -6 1706.40   80.90
   2  20  -5  317.80   28.60
   2  20  -4  761.10   41.10
   2  20  -3 3313.10  123.90
   2  20  -2 2207.00   92.40
   2  20  -1    6.10   24.40
   2  20   0  466.80   36.90
   2  20   1  244.00   31.50
   2  20   2 1052.90   60.10
   2  20   3 1150.40   60.70
   2  20   4 4492.60  168.90
   2  20   5   53.00   25.80
   2  20   6 5650.20  202.80
   2  20   7 3578.20  139.40
   2  20   8   74.20   25.70
   2  20   9 6343.50  213.80
   2  20  10 1064.90   60.70
   2  20  11 3474.20  138.60
   2  20  12   37.10   26.00
   2  20  13 1514.00   73.30
   2  20  14   62.70   26.60
   2  20  15 3834.30  143.50
   2  20  16  648.40   54.90
   2  20  17    6.40   24.30
   2  20  18 1616.50   78.30
   2  20  19 4509.00  192.60
   2  20  20  221.60   28.80
   2  20  21  712.70   64.00
   2  20  22  273.40   41.10
   2  20  23  562.50   59.30
   2  20  24  348.20   45.00
   2  21 -24  170.60   57.60
   2  21 -23  140.80   54.70
   2  21 -22   85.30   52.60
   2  21 -21 1472.10  126.70
   2  21 -20  440.70   89.30
   2  21 -19 1686.00  149.90
   2  21 -18    7.20   36.30
   2  21 -17  -16.30   41.80
   2  21 -16 2660.70  221.80
   2  21 -15  134.00   63.30
   2  21 -1414482.70  706.10
   2  21 -13  530.00   87.10
   2  21 -1219321.40  861.60
   2  21 -11  897.80   57.40
   2  21 -10   29.40   26.20
   2  21  -9 1610.90   79.30
   2  21  -8 1735.60   85.50
   2  21  -7 6583.10  239.50
   2  21  -6   62.50   21.10
   2  21  -5 7925.50  248.00
   2  21  -4  210.20   38.40
   2  21  -3 5157.50  182.10
   2  21  -2  176.30   26.40
   2  21  -1 1052.90   59.20
   2  21   0 1407.40   71.70
   2  21   1 1692.60   83.90
   2  21   214392.20  446.60
   2  21   3 3052.80  114.30
   2  21   4 2568.50  117.00
   2  21   5   53.90   24.20
   2  21   6   -8.10   26.90
   2  21   7  250.40   37.40
   2  21   8   22.60   26.80
   2  21   9  488.60   37.60
   2  21  10  -20.70   23.60
   2  21  11  620.90   46.10
   2  21  12  745.60   50.20
   2  21  13   80.80   24.80
   2  21  14  104.80   32.20
   2  21  15  861.10   69.30
   2  21  16 4188.80  168.70
   2  21  17  174.80   32.40
   2  21  18   44.10   23.30
   2  21  19  479.70   53.10
   2  21  20 2199.70  109.10
   2  21  21  437.20   47.50
   2  21  22 1283.10  122.30
   2  21  23  412.10   82.90
   2  22 -22   35.10   48.10
   2  22 -21  -61.30   42.60
   2  22 -20   27.60   55.80
   2  22 -19   17.50   47.40
   2  22 -18  569.70   83.00
   2  22 -17  109.40   57.10
   2  22 -16 3701.30  221.80
   2  22 -15 1557.30  136.50
   2  22 -14  802.70  102.60
   2  22 -13  411.10   59.10
   2  22 -12  -21.00   38.70
   2  22 -11   22.80   53.00
   2  22 -10  599.70   79.40
   2  22  -9  391.50   74.70
   2  22  -8 2986.40  211.70
   2  22  -7  175.20   31.80
   2  22  -6  187.00   32.20
   2  22  -5  246.20   32.70
   2  22  -4 1054.40   59.90
   2  22  -3 2758.90  120.10
   2  22  -2 4280.10  172.30
   2  22  -1  229.60   30.40
   2  22   0  131.50   28.00
   2  22   1 1833.70   89.70
   2  22   2 8759.50  314.30
   2  22   3  -28.20   26.70
   2  22   415361.40  454.30
   2  22   5 5888.70  222.70
   2  22   610897.90  358.90
   2  22   7  215.20   29.40
   2  22   8   59.30   25.30
   2  22   9  775.60   47.20
   2  22  10 1383.10   70.30
   2  22  11 1343.40   72.40
   2  22  12   35.50   26.30
   2  22  13 1224.20   70.50
   2  22  14  120.00   31.50
   2  22  15   10.90   22.80
   2  22  16  360.40   34.80
   2  22  17 1364.20   87.40
   2  22  18 2182.50  111.00
   2  22  19  440.60   80.60
   2  22  20 8011.80  499.40
   2  22  21   70.30   51.00
   2  23 -20  655.20   86.50
   2  23 -19  859.00   98.70
   2  23 -18   80.90   59.50
   2  23 -17 2171.70  151.40
   2  23 -16 2087.80  159.00
   2  23 -15 2083.60  140.80
   2  23 -1412381.00  601.70
   2  23 -13 1704.60  146.90
   2  23 -1214670.00  719.80
   2  23 -11 2578.80  146.90
   2  23 -10 1429.30  124.20
   2  23  -9 1308.20  110.20
   2  23  -8  435.10   74.60
   2  23  -7   -5.80   42.10
   2  23  -6  242.50   54.10
   2  23  -5  131.40   32.30
   2  23  -4  448.00   57.30
   2  23  -3  730.80   81.20
   2  23  -2   49.90   21.50
   2  23  -1 1435.00   75.00
   2  23   0 1221.20   65.20
   2  23   1  993.60   60.40
   2  23   2 8851.70  312.30
   2  23   3 1061.00   65.90
   2  23   4 7928.70  273.80
   2  23   5  656.80   42.10
   2  23   6 1583.10   75.10
   2  23   7  889.30   53.90
   2  23   8   64.20   23.60
   2  23   9 2237.90   96.10
   2  23  10  754.00   55.70
   2  23  11   48.80   28.30
   2  23  12  350.60   41.30
   2  23  13  504.60   43.10
   2  23  14   75.30   29.90
   2  23  15   58.30   29.80
   2  23  16   45.10   46.80
   2  23  17 1184.70  126.30
   2  23  18  769.30   86.90
   2  23  19  938.50   95.70
   2  24 -18  -21.80   30.00
   2  24 -17  658.90   72.30
   2  24 -16  174.50   62.90
   2  24 -15 1910.30  148.60
   2  24 -14   28.80   56.60
   2  24 -13  243.80   55.80
   2  24 -12 1200.80   95.80
   2  24 -11 1845.30  124.80
   2  24 -10  694.70   77.20
   2  24  -9   -2.90   44.80
   2  24  -8  -28.50   41.00
   2  24  -7  551.20   61.40
   2  24  -6 1483.50  121.40
   2  24  -5  117.80   50.00
   2  24  -4 1303.00  115.70
   2  24  -3  318.00   66.10
   2  24  -2  157.80   46.80
   2  24  -1  -49.20   35.20
   2  24   0  445.60   61.40
   2  24   1 4563.80  295.10
   2  24   2 3701.50  244.70
   2  24   3  241.00   34.50
   2  24   4 3979.30  156.70
   2  24   5 5554.20  209.90
   2  24   6  649.80   55.40
   2  24   7 1922.60  101.30
   2  24   8   85.10   27.20
   2  24   9 1912.00   98.60
   2  24  10   44.70   25.80
   2  24  11 3447.90  154.80
   2  24  12  741.70   86.00
   2  24  13  849.90  103.30
   2  24  14   38.70   53.60
   2  24  15  132.90   57.40
   2  24  16 1261.70  133.90
   2  25 -16 2087.80  182.60
   2  25 -15  -59.50   50.60
   2  25 -14 3542.40  255.60
   2  25 -13  945.00  101.20
   2  25 -12  -26.30   38.40
   2  25 -11  293.90   57.40
   2  25 -10  706.60   81.30
   2  25  -9   87.70   42.70
   2  25  -8 1217.80  108.00
   2  25  -7  959.30   98.20
   2  25  -6  820.50   97.10
   2  25  -5 2298.30  157.80
   2  25  -4   47.90   43.10
   2  25  -3  864.10   82.40
   2  25  -2  221.40   56.40
   2  25  -1  299.30   45.20
   2  25   0  924.90  103.00
   2  25   1  124.40   44.10
   2  25   2  587.10   72.60
   2  25   3 1977.20  144.00
   2  25   4 2078.40  177.40
   2  25   5  169.10   43.50
   2  25   6 2414.70  162.20
   2  25   7  281.90   48.60
   2  25  12   33.90   44.40
   2  25  13   77.20   48.60
   2  25  14  226.50   60.90
   2  25  15    6.60   36.10
   2  26 -13  995.60   97.70
   2  26 -12  -70.20   48.10
   2  26 -11  344.00   69.20
   2  26 -10 1043.10  113.90
   2  26  -9   31.10   37.80
   2  26  -8  461.80   79.20
   2  26  -7  341.10   64.10
   2  26  -6   32.70   49.30
   2  26  -5  236.30   60.80
   2  26  -4  819.80   98.00
   2  26  -3  -83.60   40.80
   2  26  -2 2723.50  189.70
   2  26  -1  625.90   87.70
   2  26   0 4186.40  294.80
   2  26   1 1395.10  148.60
   2  26   2  255.30   56.60
   2  27  -9  314.30   70.40
   2  27  -8  926.50  105.00
   2  27  -7   44.60   44.40
   2  27  -6  398.30   68.80
   2  27  -5  482.20   67.40
   3   0 -36  -31.00   34.20
   3   0 -35 2172.40  121.50
   3   0 -34   67.20   38.60
   3   0 -33   90.40   30.80
   3   0 -32    1.30   31.40
   3   0 -31  297.50   43.10
   3   0 -30  -43.10   30.80
   3   0 -29  387.00   46.20
   3   0 -28  104.50   43.40
   3   0 -27 6805.90  237.90
   3   0 -26   14.80   33.80
   3   0 -2512161.00  365.50
   3   0 -24  -10.10   28.60
   3   0 -23 2678.10  100.80
   3   0 -22  -37.10   17.20
   3   0 -21  209.50   27.20
   3   0 -20   -1.70   17.60
   3   0 -19   12.20   25.90
   3   0 -18   -6.50   19.90
   3   0 -17 2356.60   88.20
   3   0 -16  -22.00   16.50
   3   0 -15  194.10   20.70
   3   0 -14    5.40   14.70
   3   0 -13  262.80   22.00
   3   0 -12    2.60   10.30
   3   0 -10   14.20    9.20
   3   0  -8   28.20    6.90
   3   0  -7 8658.90  163.90
   3   0  -6   29.10    6.70
   3   0  -4   14.00    5.30
   3   0  -315036.90  405.40
   3   0  -2   12.60    4.30
   3   0  -1 4028.70   83.60
   3   0   0   11.50    4.20
   3   0   1 5543.90  108.20
   3   0   2    9.30    4.60
   3   0   316796.90  624.70
   3   0   4   11.00    6.00
   3   0   518104.20  393.70
   3   0   6    5.30    7.20
   3   0   8    3.40    8.60
   3   0   940437.90 1476.30
   3   0  10  -23.50   14.90
   3   0  11 6004.00  190.10
   3   0  12  -21.20   14.20
   3   0  13  353.30   23.50
   3   0  14   -5.70   13.50
   3   0  1516746.20  453.50
   3   0  16  -39.40   18.00
   3   0  17  424.70   32.40
   3   0  18    4.30   19.90
   3   0  19 1544.00   63.50
   3   0  20    1.40   22.60
   3   0  21 4609.80  161.10
   3   0  22   34.90   24.10
   3   0  2319427.50  558.40
   3   0  24  103.20   38.90
   3   0  2522547.80  691.10
   3   0  26   40.30   32.70
   3   0  27 2560.40  127.10
   3   0  28    1.90   31.00
   3   0  29 3120.50  144.60
   3   0  30   25.30   34.00
   3   0  31   80.90   29.80
   3   0  32  -32.00   32.00
   3   0  33   88.90   39.40
   3   0  34  -27.10   36.80
   3   1 -36    2.70   26.90
   3   1 -35   63.00   24.20
   3   1 -34   84.30   24.30
   3   1 -33   15.70   23.80
   3   1 -32 1570.80   61.40
   3   1 -31  -22.20   22.40
   3   1 -30 1500.20   59.60
   3   1 -29 2681.30   84.50
   3   1 -28 1294.20   52.40
   3   1 -27 3289.10   94.70
   3   1 -26  379.90   26.80
   3   1 -25   20.50   18.50
   3   1 -24 6472.00  144.70
   3   1 -23 4093.50  102.40
   3   1 -22 1544.30   47.10
   3   1 -21 4484.40  104.80
   3   1 -20  750.00   28.30
   3   1 -19 2100.80   60.90
   3   1 -18 4108.30   98.90
   3   1 -17 3672.00   90.10
   3   1 -16 1116.80   34.10
   3   1 -1516263.50  300.60
   3   1 -14 1150.50   33.50
   3   1 -13  689.20   24.30
   3   1 -12 1634.30   35.80
   3   1 -1138904.40  618.00
   3   1 -1021573.30  275.00
   3   1  -935970.40  628.00
   3   1  -8  940.70   20.80
   3   1  -710679.90  148.10
   3   1  -612090.90  163.10
   3   1  -5 1328.40   23.90
   3   1  -413955.90  197.20
   3   1  -311573.50  152.30
   3   1  -218208.50  329.60
   3   1  -1  266.90    6.40
   3   1   0 3608.60   52.50
   3   1   1   73.90    3.80
   3   1   2 9625.40  137.40
   3   1   3 2657.60   43.40
   3   1   4 1026.90   20.20
   3   1   627815.50  573.40
   3   1  10 4790.10  100.70
   3   1  11 4610.40  109.70
   3   1  12 1079.40   31.20
   3   1  13 5728.80  121.70
   3   1  14  999.60   32.60
   3   1  15 2985.20   75.40
   3   1  16  934.00   36.50
   3   1  17 5048.00  121.60
   3   1  18 2772.10   70.90
   3   1  19 1968.50   58.80
   3   1  20  857.90   35.30
   3   1  21  101.60   17.30
   3   1  22 2696.30   78.30
   3   1  23  249.60   22.20
   3   1  24   -1.30   20.70
   3   1  25  575.50   38.80
   3   1  26  569.30   35.00
   3   1  27  149.40   25.10
   3   1  28 4003.80  122.50
   3   1  29  361.40   32.20
   3   1  30 1187.80   57.60
   3   1  31   47.30   24.30
   3   1  32   65.00   26.40
   3   1  33 1233.30   62.20
   3   1  34   31.20   24.80
   3   2 -36  270.40   31.10
   3   2 -35 1597.80   67.50
   3   2 -34 1749.70   69.20
   3   2 -33   73.30   23.30
   3   2 -32  -23.20   22.40
   3   2 -31   97.50   25.00
   3   2 -30  244.80   29.70
   3   2 -29 3623.10  108.30
   3   2 -28 1576.50   60.90
   3   2 -27 3139.10   88.00
   3   2 -26  -15.10   20.80
   3   2 -25  202.50   20.10
   3   2 -24   34.10   18.10
   3   2 -23 7559.40  158.20
   3   2 -22 1101.20   39.40
   3   2 -21  422.80   24.40
   3   2 -20 4959.70  105.90
   3   2 -19 2867.50   71.60
   3   2 -18 3297.00   81.20
   3   2 -17   -8.90   12.40
   3   2 -1613729.40  257.70
   3   2 -15  201.90   15.40
   3   2 -1431825.70  564.70
   3   2 -13 3357.60   66.00
   3   2 -12  100.70    9.40
   3   2 -11 9807.00  136.50
   3   2 -10 7903.50  110.40
   3   2  -925617.40  348.60
   3   2  -8 2358.60   40.80
   3   2  -7 3657.90   56.40
   3   2  -612387.80  166.70
   3   2  -510835.80  145.70
   3   2  -4 4909.90   71.20
   3   2  -3 3697.50   52.90
   3   2  -2  742.40   16.90
   3   2  -1 2158.70   31.70
   3   2   0 6007.60   81.00
   3   2   1 2360.70   34.80
   3   2   2  100.60    4.50
   3   2   312640.10  165.20
   3   2   4 1617.30   28.70
   3   2   5 1885.20   32.30
   3   2   6 6333.90   92.10
   3   2   7 1761.50   31.10
   3   2   814261.80  196.30
   3   2   9 2807.90   52.00
   3   2  1011997.60  226.60
   3   2  11  387.60   20.90
   3   2  1232993.60  617.00
   3   2  13 8980.20  192.40
   3   2  14 7294.50  157.70
   3   2  15  775.90   30.20
   3   2  1611153.40  242.40
   3   2  17  226.70   19.00
   3   2  18 3651.30   87.50
   3   2  19 8463.10  181.20
   3   2  20  154.00   17.40
   3   2  21 4429.50  113.50
   3   2  22  387.70   26.40
   3   2  23 5211.40  132.90
   3   2  24 7958.00  193.30
   3   2  2518726.30  403.30
   3   2  26 3682.80  110.20
   3   2  27 7498.20  177.90
   3   2  28  -20.90   23.30
   3   2  29  172.80   27.20
   3   2  30  538.30   36.30
   3   2  31   -8.40   22.50
   3   2  32 1027.30   55.40
   3   2  33   86.40   26.70
   3   2  34  428.20   36.80
   3   3 -36   26.70   23.80
   3   3 -35 2064.10   83.20
   3   3 -34  184.30   30.80
   3   3 -33   30.70   22.90
   3   3 -32 2205.20   75.30
   3   3 -31   56.10   24.50
   3   3 -30 1188.50   53.00
   3   3 -29  955.30   43.30
   3   3 -28 1806.80   63.20
   3   3 -27  -57.30   21.40
   3   3 -26   17.80   18.10
   3   3 -25  -26.10   18.40
   3   3 -24 2880.10   73.80
   3   3 -23 1881.00   54.30
   3   3 -22  170.10   21.50
   3   3 -21 1062.50   36.30
   3   3 -20 1041.80   34.90
   3   3 -19  250.80   18.80
   3   3 -18   21.70   15.10
   3   3 -17  556.90   23.60
   3   3 -16 3666.00   77.90
   3   3 -15   -0.60   10.40
   3   3 -14 4376.40   96.00
   3   3 -13 1635.30   39.70
   3   3 -12 4660.90   94.90
   3   3 -11 3260.00   53.90
   3   3 -10 1919.10   32.40
   3   3  -9 1107.60   21.30
   3   3  -8 2144.40   34.30
   3   3  -7 7310.10  102.20
   3   3  -6  826.30   16.70
   3   3  -5 2192.40   36.00
   3   3  -4 5392.40   75.40
   3   3  -3 1585.60   27.10
   3   3  -1   28.50    3.20
   3   3   1  315.30    7.10
   3   3   220364.30  532.00
   3   3   315284.50  225.30
   3   3   4  101.70    5.40
   3   3   5  466.40   10.60
   3   3   6 1316.70   23.50
   3   3   717119.50  224.00
   3   3   8 1767.80   34.00
   3   3   920569.10  274.20
   3   3  10 3737.40   85.20
   3   3  11 4071.30   99.90
   3   3  12 1969.10   53.00
   3   3  13  248.00   15.90
   3   3  14 4240.60   97.60
   3   3  15  734.40   31.70
   3   3  16 4465.20  109.70
   3   3  17 1904.90   57.70
   3   3  18 9439.90  194.40
   3   3  19 1486.90   46.70
   3   3  20  215.10   20.40
   3   3  21  371.50   24.60
   3   3  22 1691.10   53.80
   3   3  23  664.30   34.70
   3   3  24   18.30   19.90
   3   3  25 8263.70  197.20
   3   3  26  114.00   22.80
   3   3  27  989.20   44.90
   3   3  28 1502.90   62.90
   3   3  29 2031.00   73.90
   3   3  30  569.10   42.10
   3   3  31  107.50   28.40
   3   3  32  212.10   30.70
   3   3  33 1106.50   57.50
   3   3  34  135.20   27.50
   3   4 -36  189.00   34.80
   3   4 -35   16.10   27.10
   3   4 -34  402.60   34.10
   3   4 -33   42.90   24.30
   3   4 -32   26.70   23.70
   3   4 -31  -12.60   19.20
   3   4 -30 1272.10   56.00
   3   4 -29 1513.20   52.40
   3   4 -28 1889.60   67.70
   3   4 -27 1277.80   51.50
   3   4 -26  245.00   25.60
   3   4 -2510702.20  213.40
   3   4 -24 5028.40  111.50
   3   4 -2323705.00  425.60
   3   4 -22 4339.60   94.10
   3   4 -21  888.80   30.80
   3   4 -20  880.60   31.00
   3   4 -19  612.40   25.10
   3   4 -18 5712.30  118.70
   3   4 -17  344.90   19.90
   3   4 -16 8655.80  176.80
   3   4 -15  366.40   20.40
   3   4 -14 6555.30  137.80
   3   4 -13 2141.30   47.20
   3   4 -12   12.80    7.60
   3   4 -11 3006.90   52.40
   3   4 -10  775.50   16.70
   3   4  -9  600.10   13.90
   3   4  -8 5798.40   84.10
   3   4  -7 6715.20   92.20
   3   4  -6 5152.90   74.20
   3   4  -4 2043.70   32.30
   3   4  -310936.80  154.90
   3   4  -224054.90  435.50
   3   4  -1 2645.50   41.40
   3   4   0 2686.30   42.20
   3   4   117067.40  436.10
   3   4   2 5935.60   84.00
   3   4   3 5054.80   72.90
   3   4   4 3954.20   60.60
   3   4   5  546.20   12.70
   3   4   6 9501.30  142.50
   3   4   7 3363.40   52.10
   3   4   8   36.70    6.10
   3   4   9 3722.10   64.10
   3   4  10  781.30   25.10
   3   4  1113235.70  257.60
   3   4  12 1528.70   43.90
   3   4  1311908.10  223.40
   3   4  14   54.90   12.40
   3   4  15 2555.20   64.60
   3   4  1613448.30  268.20
   3   4  17 1423.60   39.60
   3   4  18 3051.90   70.40
   3   4  19 5018.20  110.70
   3   4  20 2011.30   57.70
   3   4  2125964.30  491.80
   3   4  22  523.00   31.30
   3   4  23  535.10   30.80
   3   4  24  199.60   26.00
   3   4  25 2341.60   73.40
   3   4  26 2720.60   85.40
   3   4  27  884.70   41.10
   3   4  28    8.80   23.00
   3   4  29  597.30   38.90
   3   4  30 4107.30  133.50
   3   4  31   -3.60   24.20
   3   4  32 1590.30   67.10
   3   4  33  620.10   44.90
   3   4  34   70.50   24.80
   3   5 -36  221.80   50.50
   3   5 -35  347.10   30.30
   3   5 -34  294.90   32.20
   3   5 -33  319.00   29.50
   3   5 -32  367.90   29.90
   3   5 -31  296.00   29.80
   3   5 -30    7.80   19.70
   3   5 -29  254.30   24.40
   3   5 -28  -18.00   20.30
   3   5 -27 2706.30   77.70
   3   5 -26 1413.30   46.00
   3   5 -25  328.50   26.70
   3   5 -24 2414.80   69.80
   3   5 -2342984.30  752.10
   3   5 -22  129.80   24.30
   3   5 -2128749.70  525.00
   3   5 -20 5341.30  116.60
   3   5 -19 1178.90   37.20
   3   5 -18  160.60   17.50
   3   5 -17  270.00   17.20
   3   5 -16 5302.10  113.10
   3   5 -15  552.70   23.70
   3   5 -14   20.30   10.90
   3   5 -13   19.00    7.70
   3   5 -12 6673.30  125.70
   3   5 -11 2190.60   42.60
   3   5 -10 1093.60   23.70
   3   5  -9 4010.20   67.70
   3   5  -8 2244.50   36.00
   3   5  -710751.60  141.50
   3   5  -621358.10  292.10
   3   5  -5  651.90   15.60
   3   5  -412430.10  165.20
   3   5  -3 8830.60  117.90
   3   5  -2 1295.50   23.00
   3   5  -1 1730.90   28.80
   3   5   0 5609.80   81.10
   3   5   1  181.90    6.10
   3   5   2   53.90    4.50
   3   5   3 9838.20  133.30
   3   5   4 2456.20   40.80
   3   5   5 5928.70   87.40
   3   5   6  313.10    9.70
   3   5   7 4419.30   65.80
   3   5   813800.80  182.30
   3   5   9 2116.30   40.60
   3   5  10 1385.80   35.60
   3   5  1121303.10  391.00
   3   5  1215788.30  325.00
   3   5  1327640.80  558.50
   3   5  1417913.90  328.40
   3   5  15 3321.20   77.40
   3   5  16 1089.30   36.60
   3   5  17  740.00   28.80
   3   5  18  119.10   18.40
   3   5  1917458.90  325.30
   3   5  20   47.80   19.80
   3   5  21 1734.50   49.10
   3   5  22  118.50   19.30
   3   5  23  681.30   35.30
   3   5  24   62.70   21.00
   3   5  25  176.50   25.20
   3   5  26   64.30   20.70
   3   5  27 2487.70   80.50
   3   5  28  -14.70   23.70
   3   5  29  492.20   35.90
   3   5  30   97.20   24.50
   3   5  31 1317.40   62.20
   3   5  32  -12.20   22.90
   3   5  33  383.60   32.70
   3   5  34  385.00   34.40
   3   6 -35  104.80   23.60
   3   6 -34    3.10   20.90
   3   6 -33  342.10   28.20
   3   6 -32   89.30   22.40
   3   6 -31  271.20   28.80
   3   6 -30   32.80   21.10
   3   6 -29  132.30   23.60
   3   6 -28  216.00   25.80
   3   6 -27 1651.60   57.60
   3   6 -26 4108.20  104.00
   3   6 -25 1703.70   51.30
   3   6 -24  927.90   39.60
   3   6 -23 5910.40  131.70
   3   6 -22 1048.80   42.30
   3   6 -21 1720.30   51.10
   3   6 -20  787.10   30.40
   3   6 -19 1624.60   48.00
   3   6 -18 1148.70   37.00
   3   6 -17  861.10   32.40
   3   6 -16   30.20   14.10
   3   6 -15 5364.60  124.10
   3   6 -14  875.50   29.90
   3   6 -13 3350.30   66.10
   3   6 -12  160.70   10.20
   3   6 -1114861.50  221.20
   3   6 -10   29.40    6.10
   3   6  -9 8569.50  128.80
   3   6  -8 1967.80   32.80
   3   6  -742255.20  883.30
   3   6  -6  144.60    7.20
   3   6  -437969.80  973.60
   3   6  -332346.10 1154.90
   3   6  -2 6558.40   93.40
   3   6  -1 1907.30   30.60
   3   6   010585.90  139.80
   3   6   119104.00  320.30
   3   6   225343.90  533.60
   3   6   320516.90  328.90
   3   6   4 4153.80   60.50
   3   6   5  271.70    7.70
   3   6   6  148.30    7.20
   3   6   7 1940.60   33.70
   3   6   8   91.10    7.50
   3   6   918324.50  311.30
   3   6  10  365.60   14.70
   3   6  11   47.60   14.20
   3   6  12   15.70   12.40
   3   6  13 3940.50   92.50
   3   6  14 1401.20   40.90
   3   6  15  695.70   25.20
   3   6  16   12.60   12.70
   3   6  17  199.30   17.30
   3   6  18 4044.20   88.00
   3   6  1910331.30  201.10
   3   6  20  855.10   33.40
   3   6  2118783.20  354.70
   3   6  22 2926.90   82.60
   3   6  23  201.20   20.90
   3   6  24 1584.20   54.80
   3   6  25  491.80   31.10
   3   6  26  243.60   25.60
   3   6  27  841.90   40.70
   3   6  28  340.90   31.90
   3   6  29    1.30   22.50
   3   6  30   10.40   21.80
   3   6  31   40.50   23.90
   3   6  32  129.30   25.40
   3   6  33    2.10   22.70
   3   6  34  139.70   31.20
   3   7 -35    8.90   17.80
   3   7 -34  188.90   28.50
   3   7 -33  101.10   25.80
   3   7 -32  752.20   39.30
   3   7 -31  147.80   25.70
   3   7 -30   70.10   22.40
   3   7 -29  263.40   29.10
   3   7 -28 1074.50   43.40
   3   7 -27    1.70   19.80
   3   7 -26 1136.60   45.30
   3   7 -25 1340.90   47.60
   3   7 -24  306.00   25.40
   3   7 -2322399.10  428.10
   3   7 -22 9777.60  203.80
   3   7 -21 9335.80  198.70
   3   7 -20 5884.30  138.30
   3   7 -19 1854.60   50.90
   3   7 -18  379.00   21.50
   3   7 -17 1467.60   41.30
   3   7 -16  825.70   31.70
   3   7 -15 1352.50   40.00
   3   7 -14 4644.10  106.00
   3   7 -13  428.90   16.60
   3   7 -1214875.50  269.40
   3   7 -11 3535.00   62.90
   3   7 -1014021.30  200.90
   3   7  -9 2230.30   39.40
   3   7  -8 2970.70   49.50
   3   7  -738426.70  794.30
   3   7  -612533.80  168.80
   3   7  -523239.60  312.90
   3   7  -4 9953.60  132.70
   3   7  -3 2320.70   38.00
   3   7  -210238.10  135.70
   3   7  -1  126.60    4.50
   3   7   0  803.70   16.20
   3   7   116192.30  222.00
   3   7   2 5164.80   72.80
   3   7   335668.40  606.30
   3   7   4   19.10    4.80
   3   7   5 1483.60   26.00
   3   7   6  642.40   14.40
   3   7   7 8122.10  122.90
   3   7   8 4778.80   86.30
   3   7   9  620.50   20.00
   3   7  10 1655.40   41.00
   3   7  11 8701.90  178.80
   3   7  12  629.70   23.60
   3   7  13 7997.70  168.10
   3   7  14  159.00   16.10
   3   7  15   66.10   14.40
   3   7  16 1537.90   48.80
   3   7  17  169.60   17.30
   3   7  1812456.90  238.30
   3   7  19 4836.80  112.90
   3   7  20 5930.80  131.90
   3   7  21 1247.90   43.80
   3   7  22 5073.10  125.40
   3   7  23  -23.00   18.30
   3   7  24  975.30   40.80
   3   7  25  492.00   31.30
   3   7  26 2230.90   76.70
   3   7  27  194.70   26.40
   3   7  28  277.20   28.00
   3   7  29   19.80   20.00
   3   7  30 1565.60   60.40
   3   7  31  219.10   27.30
   3   7  32  371.10   35.40
   3   7  33   -3.60   20.30
   3   7  34  154.90   41.20
   3   8 -35 1644.20   79.30
   3   8 -34   29.40   23.70
   3   8 -33  727.00   47.40
   3   8 -32   -2.20   18.90
   3   8 -31    9.50   16.90
   3   8 -30  164.10   23.60
   3   8 -29  486.40   33.30
   3   8 -28  278.60   27.00
   3   8 -27  189.60   28.30
   3   8 -26 7885.00  186.10
   3   8 -25 3749.60   97.40
   3   8 -24   -1.50   21.10
   3   8 -2317531.50  354.40
   3   8 -22 4044.80   99.20
   3   8 -21 6967.90  152.20
   3   8 -20  -26.30   15.70
   3   8 -19  609.40   26.30
   3   8 -18 1327.60   40.40
   3   8 -17  457.30   21.50
   3   8 -16 6381.30  133.30
   3   8 -15 2137.90   52.20
   3   8 -14 9041.90  183.80
   3   8 -13 9120.80  169.40
   3   8 -12  337.10   14.80
   3   8 -11 2379.40   46.30
   3   8 -10  458.70   12.50
   3   8  -9   55.30    6.40
   3   8  -8 9382.40  136.20
   3   8  -7  157.60    7.30
   3   8  -610938.00  148.70
   3   8  -5  585.50   12.70
   3   8  -4 7001.10   94.10
   3   8  -3  734.70   13.60
   3   8  -2   53.40    3.50
   3   8  -1   22.30    5.70
   3   8   011559.50  177.90
   3   8   1  188.20    6.30
   3   8   2  872.70   16.30
   3   8   3 1714.70   28.30
   3   8   4 5753.80   82.20
   3   8   5 4490.80   66.50
   3   8   6 2711.80   45.10
   3   8   7  173.40    8.40
   3   8   8 1429.20   29.50
   3   8   9 9260.60  165.30
   3   8  10  196.80   12.20
   3   8  11 6730.30  138.30
   3   8  12  884.20   28.30
   3   8  13   45.00   12.40
   3   8  1410117.80  209.80
   3   8  15  191.00   18.80
   3   8  16 8272.80  195.60
   3   8  17 2041.00   58.80
   3   8  18 3295.00   86.60
   3   8  1921876.70  435.00
   3   8  2010485.70  232.70
   3   8  2121676.30  443.60
   3   8  22 1370.50   48.70
   3   8  23  216.10   24.60
   3   8  24 1945.00   64.50
   3   8  25 3823.50  108.50
   3   8  26   20.50   20.30
   3   8  27 1743.70   66.30
   3   8  28   28.70   23.60
   3   8  29  203.90   25.30
   3   8  30 1833.00   72.30
   3   8  31  413.00   37.20
   3   8  32  868.70   51.60
   3   8  33  319.10   31.90
   3   9 -34 1974.20   71.50
   3   9 -33  211.70   30.20
   3   9 -32 1133.60   53.10
   3   9 -31  149.40   25.00
   3   9 -30  -12.20   21.10
   3   9 -29 2541.00   89.10
   3   9 -28  101.90   25.20
   3   9 -27 3313.60   98.60
   3   9 -26  268.20   24.50
   3   9 -25  633.20   31.50
   3   9 -24 2649.20   80.90
   3   9 -23 1374.50   46.30
   3   9 -22  637.40   30.70
   3   9 -21   21.00   17.70
   3   9 -20 1415.80   45.80
   3   9 -19  533.40   25.30
   3   9 -18   29.50   14.40
   3   9 -17 1743.40   50.20
   3   9 -16   11.80   15.20
   3   9 -15  646.40   27.10
   3   9 -14   27.00   12.80
   3   9 -1312704.90  251.50
   3   9 -12 4007.00   81.20
   3   9 -1133988.60  479.50
   3   9 -10 2175.00   39.60
   3   9  -9  206.90    8.70
   3   9  -8 2462.40   42.00
   3   9  -711749.90  164.40
   3   9  -6 2540.60   41.20
   3   9  -511045.10  153.50
   3   9  -4 8645.60  123.50
   3   9  -3 2311.30   37.10
   3   9  -237663.10  955.30
   3   9  -1   59.50    7.30
   3   9   0 4983.80   87.30
   3   9   1 1928.00   38.50
   3   9   2 1841.00   29.20
   3   9   3 5316.00   78.50
   3   9   4 9406.50  132.00
   3   9   5 3954.60   70.20
   3   9   6 1223.40   24.40
   3   9   718017.40  268.10
   3   9   815751.20  264.70
   3   9   925321.20  466.90
   3   9  10 8628.40  152.90
   3   9  11 2181.10   54.40
   3   9  12 4961.40  105.70
   3   9  13   41.10   11.60
   3   9  14   34.80   11.60
   3   9  15 1600.40   52.20
   3   9  16   76.10   14.50
   3   9  17  515.90   24.70
   3   9  18 2177.60   62.30
   3   9  19 5155.50  123.40
   3   9  20  423.20   28.30
   3   9  21 4487.30  121.30
   3   9  22  122.30   22.20
   3   9  23  576.60   30.00
   3   9  24  197.60   26.10
   3   9  25 9840.70  230.80
   3   9  26 1170.40   51.00
   3   9  27 9117.10  220.50
   3   9  28   -1.40   22.30
   3   9  29   42.40   22.20
   3   9  30 3937.20  117.30
   3   9  31  400.40   34.30
   3   9  32 1248.90   56.70
   3   9  33  141.80   25.50
   3  10 -34  259.80   31.00
   3  10 -33   48.50   25.20
   3  10 -32  220.80   29.70
   3  10 -31  982.50   45.20
   3  10 -30 3235.40   93.60
   3  10 -29 5865.90  158.50
   3  10 -28 6865.10  165.80
   3  10 -27 2880.50   85.40
   3  10 -26    0.00   19.50
   3  10 -25  324.60   26.10
   3  10 -24 2295.10   66.90
   3  10 -23  882.10   38.90
   3  10 -22 2827.00   75.60
   3  10 -21 1375.60   49.30
   3  10 -20 2903.80   75.40
   3  10 -19  391.80   27.10
   3  10 -18  568.50   28.50
   3  10 -17 5287.10  112.80
   3  10 -16 2230.70   59.70
   3  10 -15 1336.10   40.50
   3  10 -14 4198.00   96.90
   3  10 -13 4750.20  105.20
   3  10 -12 2732.50   59.10
   3  10 -11  903.80   23.50
   3  10 -10 1016.30   21.90
   3  10  -911139.90  153.00
   3  10  -829713.50  387.00
   3  10  -7 2306.60   39.10
   3  10  -624309.40  314.00
   3  10  -5  568.60   13.10
   3  10  -4 2215.20   36.50
   3  10  -3 6596.80   92.00
   3  10  -2  611.40   17.30
   3  10  -110492.70  209.70
   3  10   0 2346.70   50.30
   3  10   1   28.40    6.30
   3  10   2 2112.30   43.60
   3  10   3  407.00    9.80
   3  10   4 7603.40  111.60
   3  10   511093.80  156.20
   3  10   610883.70  157.80
   3  10   710637.10  165.30
   3  10   8 2469.90   54.00
   3  10   9 8718.70  158.70
   3  10  10  274.80   17.40
   3  10  11 1614.90   40.20
   3  10  1210633.40  215.30
   3  10  13  -27.80   11.80
   3  10  14 9264.10  194.60
   3  10  15 1688.60   51.00
   3  10  16 2498.50   70.30
   3  10  17   49.30   14.70
   3  10  18   80.40   14.20
   3  10  19 1482.10   50.40
   3  10  20 1999.30   63.60
   3  10  21    0.80   17.80
   3  10  22 3789.60  104.40
   3  10  23 1383.40   52.00
   3  10  24 3026.60   96.10
   3  10  2510325.20  249.60
   3  10  2613273.90  312.30
   3  10  27 5562.70  157.50
   3  10  28 2090.10   73.60
   3  10  29  130.90   23.90
   3  10  30   67.10   20.60
   3  10  31   73.90   25.60
   3  10  32   67.70   20.30
   3  11 -33  -18.90   23.30
   3  11 -32   -7.00   26.40
   3  11 -31   99.60   23.50
   3  11 -30  425.60   28.70
   3  11 -29  998.80   48.00
   3  11 -28  423.60   33.00
   3  11 -27 1086.00   41.90
   3  11 -26  233.80   23.30
   3  11 -25   33.20   20.30
   3  11 -24  931.40   44.40
   3  11 -23  742.50   37.30
   3  11 -22  -13.70   16.10
   3  11 -21 3380.10   86.80
   3  11 -20  933.00   36.60
   3  11 -19   10.70   14.30
   3  11 -18 2523.50   65.60
   3  11 -17 1722.20   49.10
   3  11 -1612393.90  244.30
   3  11 -15   15.70   13.30
   3  11 -14 1990.70   51.80
   3  11 -1314401.30  272.20
   3  11 -1244625.70 1084.40
   3  11 -1160284.80 1444.70
   3  11 -1020438.10  271.80
   3  11  -917426.70  236.10
   3  11  -8  530.90   13.40
   3  11  -7 4593.10   69.20
   3  11  -616427.10  214.40
   3  11  -5   11.70    4.70
   3  11  -4 9500.60  129.20
   3  11  -3 6057.70  107.20
   3  11  -2  269.50   12.10
   3  11  -1 1499.20   40.30
   3  11   0 4776.20   88.10
   3  11   1 4726.90   86.60
   3  11   2  959.10   24.80
   3  11   3 5619.80   89.10
   3  11   416543.50  226.50
   3  11   5 4840.50   83.40
   3  11   6 8297.60  136.30
   3  11   821565.60  394.80
   3  11   936989.80  787.40
   3  11  1044168.80  929.70
   3  11  11  398.00   18.60
   3  11  12 1174.50   32.40
   3  11  13 1896.00   51.70
   3  11  14 1764.50   49.60
   3  11  15  962.30   35.40
   3  11  16   82.90   16.70
   3  11  17 2349.80   63.00
   3  11  18  283.90   19.50
   3  11  19   14.30   15.50
   3  11  20   36.90   16.30
   3  11  21   16.20   17.10
   3  11  22  288.40   25.60
   3  11  23  618.30   36.10
   3  11  24  -10.90   20.20
   3  11  25 1057.90   46.50
   3  11  26   66.60   25.30
   3  11  27  452.60   31.20
   3  11  28  209.70   26.10
   3  11  29  885.30   45.30
   3  11  30   14.50   23.70
   3  11  31  169.60   27.60
   3  11  32  207.40   29.90
   3  12 -33  303.90   30.70
   3  12 -32  399.10   30.30
   3  12 -31  380.20   32.10
   3  12 -30  595.80   35.90
   3  12 -29  769.10   41.90
   3  12 -28  948.60   48.50
   3  12 -27  671.20   33.50
   3  12 -26   65.40   17.50
   3  12 -25  992.30   41.40
   3  12 -24  954.40   38.80
   3  12 -23   18.10   14.90
   3  12 -22   -1.60   17.50
   3  12 -21  228.30   22.00
   3  12 -20 2088.00   59.70
   3  12 -19   -5.70   14.70
   3  12 -18  628.40   26.30
   3  12 -17  220.70   19.30
   3  12 -16 5015.40  106.50
   3  12 -15  251.00   18.40
   3  12 -14 1647.50   43.60
   3  12 -13 2750.10   63.40
   3  12 -12 9988.00  201.50
   3  12 -1134823.50  605.50
   3  12 -10 2677.50   49.50
   3  12  -929393.90  424.00
   3  12  -8 7044.80  103.60
   3  12  -7 1663.90   29.40
   3  12  -6  178.60    7.50
   3  12  -511708.90  156.70
   3  12  -4   46.80    4.40
   3  12  -3 3384.60   64.80
   3  12  -2  161.30    9.20
   3  12  -1  131.70    8.90
   3  12   0 4897.00   91.80
   3  12   1  426.90   14.20
   3  12   2 3947.50   77.40
   3  12   3 2768.90   55.30
   3  12   410133.30  154.30
   3  12   5 5237.00   85.70
   3  12   612606.10  192.70
   3  12   742057.80  729.10
   3  12   8  259.60   13.30
   3  12   9 7755.30  140.30
   3  12  10 3959.40   78.00
   3  12  11   58.60   10.80
   3  12  12 3478.80   80.30
   3  12  13   39.90   11.40
   3  12  14   33.80   14.10
   3  12  15 1709.00   48.20
   3  12  16 2125.90   58.10
   3  12  17  541.70   26.70
   3  12  18   56.60   17.10
   3  12  19  218.40   20.30
   3  12  20 2014.60   62.80
   3  12  21  997.90   38.80
   3  12  22 4408.80  119.40
   3  12  23 2713.00   84.60
   3  12  24 1251.20   54.30
   3  12  25 3253.00   93.60
   3  12  26 1530.30   56.10
   3  12  27  666.40   36.80
   3  12  28 1645.10   65.80
   3  12  29    6.90   22.70
   3  12  30   99.70   24.00
   3  12  31  569.50   36.50
   3  13 -32  462.90   36.70
   3  13 -31  293.90   28.40
   3  13 -30  270.60   31.10
   3  13 -29   94.20   21.70
   3  13 -28  912.00   41.60
   3  13 -27 2081.20   74.50
   3  13 -26   55.60   18.30
   3  13 -25  177.30   21.90
   3  13 -24  419.20   28.70
   3  13 -23 2953.00   85.90
   3  13 -22   52.30   18.60
   3  13 -21 5579.50  136.70
   3  13 -20  -18.70   15.10
   3  13 -19   59.20   16.00
   3  13 -18 4283.00   99.90
   3  13 -17 4731.50  106.80
   3  13 -16 9159.40  183.40
   3  13 -15 3637.50   84.90
   3  13 -14 2215.30   54.90
   3  13 -13 1291.30   36.50
   3  13 -12 9920.60  195.60
   3  13 -11 3345.10   65.50
   3  13 -10  129.70    9.70
   3  13  -9  156.60    8.10
   3  13  -8  315.00   11.00
   3  13  -7   23.10    5.70
   3  13  -6 5060.60   77.50
   3  13  -5   21.80    4.80
   3  13  -4 1339.10   30.20
   3  13  -3 1226.00   27.50
   3  13  -2 1057.80   24.90
   3  13  -1 1768.50   37.60
   3  13   0  514.90   16.10
   3  13   1 1304.10   30.30
   3  13   2 3824.40   72.50
   3  13   3 1238.70   34.80
   3  13   4   59.30   12.40
   3  13   510327.10  156.50
   3  13   626204.70  372.60
   3  13   721413.10  312.60
   3  13   8 3081.00   62.40
   3  13   910330.50  180.40
   3  13  1010032.20  179.20
   3  13  11  384.30   17.20
   3  13  12   59.90   13.30
   3  13  13 1512.80   51.40
   3  13  14   98.00   16.80
   3  13  15  557.90   26.10
   3  13  16  419.40   22.00
   3  13  17 1158.30   38.50
   3  13  18 2458.00   66.10
   3  13  19 6697.90  149.60
   3  13  20   11.00   18.70
   3  13  21 3049.30   88.40
   3  13  22   -6.20   20.60
   3  13  23  120.40   20.80
   3  13  24  879.50   46.60
   3  13  25  682.50   39.00
   3  13  26 3100.20   93.60
   3  13  27  -15.70   20.80
   3  13  28 4827.60  135.70
   3  13  29  121.20   25.60
   3  13  30  134.90   24.80
   3  13  31   85.40   25.20
   3  14 -31  594.00   45.50
   3  14 -30  946.20   52.40
   3  14 -29  764.50   42.10
   3  14 -28   -1.20   18.80
   3  14 -27   44.50   23.80
   3  14 -26  108.30   21.40
   3  14 -25 3420.30  102.10
   3  14 -24   -3.90   19.10
   3  14 -23 2797.30   84.20
   3  14 -22 2649.40   78.60
   3  14 -21  309.20   26.00
   3  14 -20 2001.60   64.50
   3  14 -19 2903.20   81.20
   3  14 -18 1201.60   44.40
   3  14 -17 2449.20   66.00
   3  14 -16  428.80   23.80
   3  14 -15   11.30   13.50
   3  14 -14 6430.90  138.00
   3  14 -13  894.20   31.20
   3  14 -12  128.90   13.90
   3  14 -11  937.40   26.60
   3  14 -10 1845.70   40.90
   3  14  -9 1114.50   26.10
   3  14  -8 8777.90  132.10
   3  14  -7  168.20    8.30
   3  14  -6 1646.20   29.60
   3  14  -5 3508.90   68.70
   3  14  -4   19.40    7.80
   3  14  -3 4495.30   83.30
   3  14  -2  301.80   12.00
   3  14  -1 5578.60  103.10
   3  14   0 2715.30   55.00
   3  14   1 5750.50  123.80
   3  14   2 1360.90   38.10
   3  14   3  119.60   11.70
   3  14   412602.10  243.20
   3  14   5  270.30   14.90
   3  14   6 7613.00  121.70
   3  14   7  826.90   21.80
   3  14   8 1221.00   30.50
   3  14   9   17.10    7.50
   3  14  1012016.60  212.80
   3  14  11  996.40   34.20
   3  14  12 4706.70  104.90
   3  14  13 1491.50   44.00
   3  14  14 8394.80  179.30
   3  14  15 2006.20   60.50
   3  14  16   29.30   14.80
   3  14  17   15.30   14.80
   3  14  18 3143.30   81.90
   3  14  19  625.40   27.80
   3  14  20 1107.10   42.80
   3  14  21 1926.00   62.50
   3  14  22  407.80   27.80
   3  14  23   76.90   21.10
   3  14  24 3028.30   95.60
   3  14  25 1936.90   69.50
   3  14  26   35.90   22.70
   3  14  27 2034.40   74.00
   3  14  28 1207.60   56.00
   3  14  29 2829.40   86.20
   3  14  30    8.70   19.90
   3  15 -31  186.10   35.00
   3  15 -30   53.20   26.90
   3  15 -29  192.50   31.20
   3  15 -28  390.10   37.40
   3  15 -27   70.00   20.30
   3  15 -26 1120.90   48.10
   3  15 -25  272.40   25.90
   3  15 -24 1992.40   67.90
   3  15 -23 1440.30   55.00
   3  15 -22   93.30   19.80
   3  15 -21 3703.30   99.20
   3  15 -20 3284.30   87.10
   3  15 -19 6717.30  155.40
   3  15 -18  586.70   28.30
   3  15 -17 4745.90  113.80
   3  15 -16  403.00   21.40
   3  15 -15 1712.60   47.30
   3  15 -14 2218.50   58.40
   3  15 -13 2114.90   55.50
   3  15 -12 7194.80  153.00
   3  15 -11   34.20    8.60
   3  15 -10 1755.60   42.40
   3  15  -9  277.80   12.00
   3  15  -8  104.60    9.10
   3  15  -7 1534.70   32.70
   3  15  -6  123.00    5.90
   3  15  -5 3078.20   67.20
   3  15  -4  713.80   22.80
   3  15  -320044.90  331.80
   3  15  -2 1277.60   34.80
   3  15  -1 1055.00   30.30
   3  15   0  178.00   12.10
   3  15   1 1024.40   28.70
   3  15   2 1629.90   42.80
   3  15   3 1616.80   41.30
   3  15   4  410.40   17.70
   3  15   5 2773.60   66.30
   3  15   6  971.20   31.10
   3  15   7  247.60   11.20
   3  15   8 4050.80   81.10
   3  15   9 1188.30   35.90
   3  15  10 9344.50  195.10
   3  15  11 3948.10   88.50
   3  15  12  170.50   15.60
   3  15  13  727.50   28.10
   3  15  14 1889.30   56.80
   3  15  15 4348.20  107.20
   3  15  16  -28.40   15.40
   3  15  17 5249.20  129.50
   3  15  18  186.50   20.10
   3  15  19 5323.90  127.40
   3  15  20 1306.70   55.40
   3  15  21   14.00   19.90
   3  15  22  880.00   37.90
   3  15  23  121.10   25.00
   3  15  24 1005.70   49.40
   3  15  25  711.30   36.80
   3  15  26  793.00   45.40
   3  15  27   76.60   28.60
   3  15  28   25.40   22.20
   3  15  29  621.80   40.60
   3  16 -30  521.40   68.10
   3  16 -29  110.40   33.10
   3  16 -28  582.40   44.70
   3  16 -27  -23.00   23.40
   3  16 -26  706.00   47.20
   3  16 -25 2528.60   88.10
   3  16 -24 2162.20   71.40
   3  16 -23  201.60   22.60
   3  16 -22  217.00   23.10
   3  16 -21 1480.20   54.50
   3  16 -20  894.20   38.20
   3  16 -19   85.10   19.60
   3  16 -18   55.30   16.30
   3  16 -17  832.40   34.50
   3  16 -16   23.50   12.00
   3  16 -15 2669.50   71.60
   3  16 -14  420.90   21.90
   3  16 -13 2781.00   72.70
   3  16 -12   49.10   13.00
   3  16 -11  121.60   12.10
   3  16 -10 5153.40  111.80
   3  16  -9  175.60   13.10
   3  16  -812105.40  186.60
   3  16  -7   54.50    5.90
   3  16  -6  756.10   25.60
   3  16  -512492.40  243.30
   3  16  -418761.10  347.30
   3  16  -327036.20  564.20
   3  16  -2 9802.60  189.40
   3  16  -118703.80  351.90
   3  16   0 3472.30   77.90
   3  16   121014.10  387.00
   3  16   2 4631.90   99.40
   3  16   3   33.50   10.10
   3  16   4  310.20   14.50
   3  16   5 2682.00   68.20
   3  16   6 5173.10  117.40
   3  16   7  120.80   18.70
   3  16   8 4286.70   97.90
   3  16   9 2113.90   57.20
   3  16  10  159.00   15.00
   3  16  11 2935.90   74.50
   3  16  12 1714.80   50.20
   3  16  13 6936.10  157.10
   3  16  14 4639.80  117.90
   3  16  15 9082.30  202.10
   3  16  16   60.60   18.00
   3  16  17  174.90   20.90
   3  16  18 2881.90   77.90
   3  16  19  299.10   24.50
   3  16  20  245.80   27.00
   3  16  21  503.50   32.60
   3  16  22  873.50   49.50
   3  16  23   26.50   21.10
   3  16  24    8.60   20.80
   3  16  25  149.10   23.90
   3  16  26  873.00   53.70
   3  16  27   40.00   26.10
   3  16  28   20.00   22.60
   3  17 -28  449.40   79.00
   3  17 -27  629.80   75.70
   3  17 -26   60.90   36.20
   3  17 -25   38.40   29.20
   3  17 -24  696.70   60.70
   3  17 -23 4150.70  170.10
   3  17 -22 3249.20   97.60
   3  17 -21 5188.50  137.50
   3  17 -20 7993.90  195.50
   3  17 -19 6564.60  165.50
   3  17 -18   15.80   17.10
   3  17 -1710070.80  231.00
   3  17 -16 6814.20  163.50
   3  17 -15  316.60   20.80
   3  17 -14 4285.10  107.50
   3  17 -13  444.60   23.10
   3  17 -12  702.80   28.30
   3  17 -11 3109.60   76.20
   3  17 -10  656.10   24.40
   3  17  -9 3565.90   82.00
   3  17  -8 3170.10   71.30
   3  17  -7  594.10   27.60
   3  17  -6 2101.50   59.20
   3  17  -5 1057.80   36.40
   3  17  -4  406.70   21.70
   3  17  -3 3328.00   72.80
   3  17  -2 1612.00   42.00
   3  17  -1  139.20   11.10
   3  17   0  458.50   18.90
   3  17   1   26.00    7.90
   3  17   2  505.00   23.00
   3  17   3   12.80   11.00
   3  17   4 3537.10   89.40
   3  17   5 3587.90  103.30
   3  17   6  211.00   19.30
   3  17   7 2087.70   67.80
   3  17   8 2633.00   79.40
   3  17   9 1322.90   46.40
   3  17  10   14.50   15.10
   3  17  11  209.50   21.00
   3  17  12 5371.00  146.10
   3  17  1311675.20  271.80
   3  17  1410799.70  278.70
   3  17  1510950.70  278.30
   3  17  16  252.50   26.70
   3  17  17 5467.00  161.80
   3  17  1810716.20  277.40
   3  17  19 4207.90  136.90
   3  17  20 1044.70   50.30
   3  17  21   34.40   22.20
   3  17  22   -5.80   21.50
   3  17  23 1862.60   72.80
   3  17  24  140.40   26.00
   3  17  25 1179.90   68.70
   3  17  26  191.10   24.90
   3  17  27  130.90   25.60
   3  18 -27  326.10   75.90
   3  18 -26 3591.40  235.10
   3  18 -25   36.20   53.10
   3  18 -24  879.60   89.50
   3  18 -23  -27.90   45.30
   3  18 -22  413.90   68.90
   3  18 -21  748.20  102.90
   3  18 -20  -27.10   41.60
   3  18 -19 1757.00   89.10
   3  18 -18 1042.80   72.00
   3  18 -17   35.40   26.40
   3  18 -16 1142.80   63.40
   3  18 -15  986.50   59.00
   3  18 -14   68.70   23.00
   3  18 -13  102.00   23.10
   3  18 -12  425.40   37.30
   3  18 -11  544.20   38.40
   3  18 -10 1724.40   69.20
   3  18  -9 1230.60   55.00
   3  18  -8   86.00   20.50
   3  18  -7  476.50   30.80
   3  18  -6  617.80   34.90
   3  18  -5 7223.80  214.90
   3  18  -430054.80  785.00
   3  18  -314542.80  384.40
   3  18  -2 3451.00   84.60
   3  18  -114310.30  314.40
   3  18   015997.20  338.10
   3  18   112510.80  284.60
   3  18   211605.20  264.50
   3  18   3  992.40   37.50
   3  18   4 4608.80  121.70
   3  18   5 2618.90   79.70
   3  18   6 2103.70   69.90
   3  18   7 4382.40  124.30
   3  18   8   49.80   17.00
   3  18   9  929.40   36.60
   3  18  10  364.40   23.80
   3  18  11 2532.00   82.90
   3  18  12  233.50   18.20
   3  18  13 1277.90   49.60
   3  18  14  -13.30   19.30
   3  18  15 1929.70   68.90
   3  18  16  183.20   26.60
   3  18  17 6438.10  191.80
   3  18  18 1407.60   58.50
   3  18  19 2205.70   85.10
   3  18  20  483.40   33.20
   3  18  21  -24.50   21.20
   3  18  22 3018.70  111.10
   3  18  23  795.20   50.00
   3  18  24  516.20   41.00
   3  18  25   70.20   25.70
   3  18  26  -23.00   27.20
   3  19 -26 1081.70  121.60
   3  19 -25  201.90   70.90
   3  19 -24  717.90  103.00
   3  19 -23  158.60   43.90
   3  19 -22 4958.00  296.60
   3  19 -21  349.10   64.20
   3  19 -20 2084.40  182.30
   3  19 -19   97.30   47.10
   3  19 -18  688.20   90.10
   3  19 -17  310.10   53.00
   3  19 -16  387.90   78.60
   3  19 -15  708.50   52.50
   3  19 -14   31.30   21.40
   3  19 -13 1057.80   56.40
   3  19 -12  262.30   28.40
   3  19 -11  732.60   47.10
   3  19 -10 2731.70  106.80
   3  19  -9  138.70   24.30
   3  19  -8 9990.30  286.50
   3  19  -7 1247.50   57.00
   3  19  -6   -0.10   18.40
   3  19  -5 5375.80  166.00
   3  19  -4  696.60   38.40
   3  19  -3 3111.60  117.60
   3  19  -2 5084.40  152.90
   3  19  -1 2319.60   92.80
   3  19   0  200.60   22.90
   3  19   1 8359.50  256.10
   3  19   2 5137.70  175.20
   3  19   3 2839.70  107.00
   3  19   4  294.20   31.80
   3  19   5  -25.50   23.00
   3  19   6 1939.30   91.60
   3  19   7 2917.30   92.70
   3  19   8  759.70   39.10
   3  19   9 2263.70   77.50
   3  19  10   50.10   14.50
   3  19  11 1294.20   51.20
   3  19  12  830.00   40.50
   3  19  13  289.90   24.90
   3  19  14  681.10   39.20
   3  19  15  580.60   39.50
   3  19  16  -12.10   19.00
   3  19  17 2622.40  120.30
   3  19  18 3533.00  154.20
   3  19  19 1294.10   73.60
   3  19  20 1827.40   90.10
   3  19  21  214.00   33.60
   3  19  22 3207.30  145.40
   3  19  23   74.70   37.00
   3  19  24 2473.80  132.90
   3  19  25  -25.00   20.90
   3  20 -25  524.20   81.90
   3  20 -24  495.80   90.60
   3  20 -23  815.80   95.90
   3  20 -22  -41.20   47.30
   3  20 -21 1073.40   97.70
   3  20 -20 1510.00  127.40
   3  20 -19  109.20   65.30
   3  20 -18 1812.60  138.80
   3  20 -17  229.90   58.80
   3  20 -16   75.40   45.90
   3  20 -15  274.60   69.00
   3  20 -14  297.10   65.50
   3  20 -13 1092.80  106.60
   3  20 -12  277.30   27.70
   3  20 -11  391.30   40.90
   3  20 -10  516.00   38.00
   3  20  -9   61.30   21.90
   3  20  -8   36.60   21.10
   3  20  -7 1282.40   63.20
   3  20  -6 2982.90  111.10
   3  20  -5 3964.50  144.50
   3  20  -4  362.10   31.30
   3  20  -3 1176.70   58.80
   3  20  -2   40.40   22.40
   3  20  -1 7383.70  231.90
   3  20   0  162.20   27.30
   3  20   1  156.80   25.00
   3  20   2  723.00   46.40
   3  20   3 2849.10  120.90
   3  20   4  218.10   27.10
   3  20   5 5239.70  180.20
   3  20   6 3555.60  127.50
   3  20   7  849.90   54.50
   3  20   8 2567.90  107.70
   3  20   9 4077.80  155.30
   3  20  10  321.30   39.20
   3  20  11 2345.80  109.00
   3  20  12  312.40   32.00
   3  20  13  265.10   32.70
   3  20  14 1669.40   80.00
   3  20  15   42.50   29.20
   3  20  16 1518.30   84.40
   3  20  17 2824.00  120.10
   3  20  18 1370.60   74.00
   3  20  19 1648.90   92.80
   3  20  20 1265.70   78.30
   3  20  21   69.00   30.80
   3  20  22  684.70   56.50
   3  20  23   40.90   33.90
   3  20  24  136.40   31.60
   3  21 -24    6.80   48.20
   3  21 -23 1199.00  128.70
   3  21 -22  259.60   77.30
   3  21 -21  255.30   57.40
   3  21 -20  735.30   93.50
   3  21 -19 1719.10  120.70
   3  21 -18  -72.70   56.80
   3  21 -17   89.60   44.70
   3  21 -16  104.00   45.80
   3  21 -15 4216.10  231.20
   3  21 -14 1713.60  151.50
   3  21 -1315591.40  773.90
   3  21 -12 1879.50  151.80
   3  21 -11 6057.10  325.80
   3  21 -10  273.60   61.70
   3  21  -9 2037.70  131.10
   3  21  -8 4327.40  161.50
   3  21  -7  179.60   22.30
   3  21  -6 4307.10  155.10
   3  21  -5  -36.00   19.20
   3  21  -4 3000.30  116.60
   3  21  -3   33.60   21.80
   3  21  -2 3276.70  125.10
   3  21  -1  103.20   28.40
   3  21   0   55.30   21.10
   3  21   1 3332.60  130.80
   3  21   2   32.30   22.80
   3  21   3 4887.20  177.20
   3  21   4  586.60   43.90
   3  21   5   63.70   28.30
   3  21   6  978.80   56.80
   3  21   7   58.90   28.00
   3  21   8 1048.90   56.80
   3  21   9 3322.10  146.00
   3  21  10 4367.40  161.50
   3  21  11 5285.40  200.00
   3  21  12  525.20   47.10
   3  21  13 1409.70   87.80
   3  21  14  199.90   30.50
   3  21  15  842.20   54.80
   3  21  16  -36.40   24.60
   3  21  17 2144.30  107.20
   3  21  18   54.10   26.70
   3  21  19  460.30   50.40
   3  21  20   -4.60   32.00
   3  21  21  768.00   62.80
   3  21  22   71.80   30.90
   3  22 -22  176.70   47.80
   3  22 -20  -55.20   43.60
   3  22 -19   27.10   41.50
   3  22 -18  -24.00   34.40
   3  22 -17 1658.20  110.40
   3  22 -16  737.20   84.40
   3  22 -15 2391.40  168.70
   3  22 -14  892.90   76.70
   3  22 -13  578.00   81.30
   3  22 -12  419.50   79.00
   3  22 -11  150.60   44.40
   3  22 -10  165.70   61.30
   3  22  -9  -22.40   37.30
   3  22  -8 3004.40  183.40
   3  22  -7  125.40   39.20
   3  22  -6  463.90   66.10
   3  22  -5  958.30   88.50
   3  22  -4  434.20   61.30
   3  22  -3 2189.20   96.40
   3  22  -2  300.10   36.20
   3  22  -1 4465.80  180.80
   3  22   0  312.00   34.20
   3  22   1  358.60   33.70
   3  22   2  220.70   31.40
   3  22   3 2840.40  123.20
   3  22   4 2111.50   86.90
   3  22   5 4025.70  161.60
   3  22   6 1448.90   76.80
   3  22   7 1204.30   66.40
   3  22   8  215.80   35.10
   3  22   9  698.00   54.90
   3  22  10  202.60   29.90
   3  22  11  322.70   37.30
   3  22  12   36.90   28.50
   3  22  13   64.30   29.20
   3  22  14   61.00   24.60
   3  22  15  130.00   30.90
   3  22  16  923.90   64.80
   3  22  17  156.80   34.40
   3  22  18  389.60   50.20
   3  22  19 1118.50   75.00
   3  22  20  505.20   51.70
   3  22  21  905.70  122.60
   3  23 -20 1536.00  155.80
   3  23 -19  418.30   86.00
   3  23 -18   26.80   47.70
   3  23 -17  540.10   84.10
   3  23 -16 2354.90  162.80
   3  23 -15 4382.70  262.20
   3  23 -14  208.30   51.70
   3  23 -1310110.40  439.90
   3  23 -12 3697.80  209.90
   3  23 -11 3132.20  213.70
   3  23 -10  232.30   46.60
   3  23  -9    9.70   37.00
   3  23  -8  111.70   50.30
   3  23  -7   48.80   48.80
   3  23  -6  191.00   59.20
   3  23  -5  303.10   47.10
   3  23  -4  -11.30   42.80
   3  23  -3   -2.40   33.00
   3  23  -2 2151.60  144.60
   3  23  -1   62.20   35.90
   3  23   0 1552.20  112.40
   3  23   1 2514.00  165.60
   3  23   2  295.40   35.40
   3  23   3 5518.30  212.20
   3  23   4  102.00   27.70
   3  23   5 1821.40   83.00
   3  23   6  944.90   56.40
   3  23   7  211.40   31.00
   3  23   8 1305.90   71.80
   3  23   9  456.40   44.50
   3  23  10 2043.60  109.00
   3  23  11 1351.50   79.30
   3  23  12  893.40   53.30
   3  23  13  712.00   55.50
   3  23  14  827.20   60.50
   3  23  15   73.40   30.90
   3  23  16  955.40   63.00
   3  23  17  117.10   33.20
   3  23  18  781.30   87.60
   3  23  19  -62.70   50.20
   3  24 -18  411.40   64.20
   3  24 -17   38.30   56.20
   3  24 -16 1406.60  149.40
   3  24 -15  114.00   62.30
   3  24 -14 1635.30  159.40
   3  24 -13  440.60   76.40
   3  24 -12  588.40   67.80
   3  24 -11  722.00   74.80
   3  24 -10   93.00   38.10
   3  24  -9   75.30   38.70
   3  24  -8 1767.20  126.50
   3  24  -7  -47.50   39.30
   3  24  -6  230.70   56.20
   3  24  -5  -38.00   43.00
   3  24  -4 1439.40  113.70
   3  24  -3   93.90   44.00
   3  24  -2  506.40   59.60
   3  24   0 1170.40   96.10
   3  24   1   95.10   42.60
   3  24   2 3329.10  187.40
   3  24   3  391.10   60.20
   3  24   4 1272.10  106.50
   3  24   6 3124.40  190.60
   3  24   7  190.70   42.20
   3  24   8  102.40   36.60
   3  24   9  142.60   30.00
   3  24  10 2489.10  113.70
   3  24  11  910.40   59.80
   3  24  12 2293.10  113.60
   3  24  13  928.60   67.40
   3  24  14   16.00   45.30
   3  24  15  231.50   54.00
   3  24  16  336.00   67.10
   3  24  17 1127.40   94.90
   3  25 -16   38.00   39.10
   3  25 -15 3724.50  234.60
   3  25 -14  768.80  100.60
   3  25 -13 1762.30  167.50
   3  25 -12  690.60   95.90
   3  25 -11  254.70   52.60
   3  25 -10   30.00   45.90
   3  25  -9  107.20   52.70
   3  25  -8 1044.60   99.10
   3  25  -7  927.80   82.50
   3  25  -6 2775.10  165.00
   3  25  -5 1357.60   99.50
   3  25  -4  -45.70   37.40
   3  25  -3  -46.10   39.10
   3  25  -2 1282.90  100.10
   3  25  -1  668.40   85.10
   3  25   0  865.50   77.30
   3  25   1 1769.00  129.20
   3  25   2  347.00   62.40
   3  25   3  108.10   42.40
   3  25   4 1769.80  138.50
   3  25   5  661.90   74.50
   3  25   6   -0.60   36.00
   3  25   7  130.40   44.10
   3  25   8   27.30   34.30
   3  25   9   75.00   40.70
   3  25  10  254.70   66.80
   3  26 -13  139.90   57.40
   3  26 -12 1098.90  103.80
   3  26 -11  634.70   82.20
   3  26 -10  980.10  116.30
   3  26  -9  317.80   59.40
   3  26  -8  967.80  136.10
   3  26  -7  445.70   72.30
   3  26  -6 1027.70  102.70
   3  26  -5  170.70   65.90
   3  26  -4  108.50   57.90
   3  26  -3 4306.70  295.40
   3  26  -2  -13.70   47.30
   3  26  -1 5341.00  370.20
   3  26   0  749.00   93.40
   3  26   1 2405.30  199.90
   3  26   2 2263.70  185.50
   3  26   3  983.20   93.10
   3  26   4 2107.80  178.80
   3  26   5  500.10   78.20
   3  27  -9  -18.00   41.20
   3  27  -8   -5.80   31.10
   3  27  -7   34.40   48.90
   3  27  -6  109.10   51.20
   3  27  -5   74.20   48.60
   3  27  -4   47.60   48.40
   3  27  -3  760.80   88.70
   3  27  -2 2029.80  185.70
   3  27  -1  153.30   52.30
   4   0 -36  457.80   64.00
   4   0 -35   -9.20   32.20
   4   0 -34  113.00   32.80
   4   0 -33  -42.00   30.00
   4   0 -32 2725.00  128.70
   4   0 -31  -23.30   37.10
   4   0 -30 1484.90   85.10
   4   0 -29    7.90   40.30
   4   0 -2811999.20  378.60
   4   0 -27   -8.60   33.00
   4   0 -2614264.00  431.10
   4   0 -25  -85.50   27.90
   4   0 -24 6223.70  206.10
   4   0 -23  -33.80   27.00
   4   0 -22 2133.00   88.30
   4   0 -21   15.60   23.20
   4   0 -20 3339.30  125.60
   4   0 -19   40.80   24.00
   4   0 -18   26.20   16.90
   4   0 -17   18.60   18.40
   4   0 -16 2649.50   90.70
   4   0 -15  -22.80   16.70
   4   0 -14  327.90   25.50
   4   0 -13    2.20   14.60
   4   0 -11   28.20   11.20
   4   0  -9   19.00    9.50
   4   0  -7   20.60    7.70
   4   0  -610809.80  206.70
   4   0  -5   22.20    6.80
   4   0  -413582.10  249.90
   4   0  -3   17.10    5.70
   4   0  -1   18.40    5.40
   4   0   1   19.70    5.60
   4   0   3    3.80    5.70
   4   0   4 1903.20   48.80
   4   0   5   11.40    6.50
   4   0   7    6.00    8.60
   4   0   9   20.40    9.50
   4   0  10 5487.80  165.50
   4   0  11   13.20   14.20
   4   0  12 9392.10  248.00
   4   0  13    5.60   17.50
   4   0  14  924.10   43.80
   4   0  15    9.30   16.70
   4   0  16 4785.40  163.80
   4   0  17    3.50   18.60
   4   0  18  696.70   37.00
   4   0  19   -1.30   22.30
   4   0  20  306.60   27.70
   4   0  21  -16.80   20.90
   4   0  2216021.60  472.50
   4   0  23  -29.80   26.00
   4   0  24 6901.20  236.00
   4   0  25   24.90   35.60
   4   0  26  506.50   46.10
   4   0  27  -52.30   26.70
   4   0  28 1190.50   76.60
   4   0  29    6.60   32.90
   4   0  30   15.40   34.70
   4   0  31  -26.40   40.20
   4   0  32 1354.40   92.60
   4   0  33   36.80   34.20
   4   0  34  118.30   38.30
   4   1 -36   37.20   23.50
   4   1 -35   77.70   28.20
   4   1 -34  517.90   34.20
   4   1 -33 1713.80   64.30
   4   1 -32   17.00   20.70
   4   1 -31 1876.70   66.40
   4   1 -30  236.00   32.00
   4   1 -29 1289.50   57.20
   4   1 -28 8998.30  211.30
   4   1 -27   -7.40   28.30
   4   1 -26 4030.50  107.00
   4   1 -25 2360.20   68.90
   4   1 -24   81.00   20.30
   4   1 -23  985.80   37.20
   4   1 -22 4259.20  105.00
   4   1 -21  512.30   25.00
   4   1 -20 4130.60   99.20
   4   1 -19   38.60   16.50
   4   1 -18  167.10   16.90
   4   1 -17  162.80   16.80
   4   1 -16 9869.80  195.70
   4   1 -15 2540.40   61.80
   4   1 -14 9213.30  187.20
   4   1 -13  160.70   12.20
   4   1 -1242071.50  871.60
   4   1 -1113924.60  187.50
   4   1 -1050310.20  842.80
   4   1  -912968.50  171.90
   4   1  -818520.10  239.10
   4   1  -7 1639.20   29.30
   4   1  -6 4545.50   69.00
   4   1  -517168.20  224.70
   4   1  -4 2295.70   37.90
   4   1  -3 9142.30  127.20
   4   1  -2 1741.40   29.50
   4   1  -120127.10  520.80
   4   1   0 1948.80   31.20
   4   1   1 6561.60   92.60
   4   1   2 9858.30  135.30
   4   1   310595.30  148.40
   4   1   4 7659.10  109.90
   4   1   5 2864.30   47.00
   4   1   725330.60  367.70
   4   1   916730.40  226.10
   4   1  10 3736.80   90.50
   4   1  11 5747.20  124.10
   4   1  12 3253.30   74.80
   4   1  13 8033.00  159.80
   4   1  14 3795.70   86.10
   4   1  15 2275.10   77.50
   4   1  16   26.80   14.40
   4   1  17 2723.80   69.90
   4   1  18  898.30   33.10
   4   1  19  202.10   17.70
   4   1  20   76.10   17.00
   4   1  21 6084.70  144.70
   4   1  22  442.10   29.60
   4   1  23  346.50   26.80
   4   1  24  179.90   26.10
   4   1  25 1312.30   56.90
   4   1  26  227.00   27.80
   4   1  27 2750.70   85.80
   4   1  28  371.60   34.60
   4   1  29 1928.90   70.20
   4   1  30  138.20   26.20
   4   1  31   13.00   25.00
   4   1  32 2438.60   90.30
   4   1  33   73.10   23.60
   4   1  34 3369.10  127.60
   4   2 -36  266.10   30.90
   4   2 -35  583.60   39.70
   4   2 -34   44.40   25.00
   4   2 -33   58.50   21.30
   4   2 -32   17.30   22.00
   4   2 -31  502.70   35.00
   4   2 -30 6862.80  174.30
   4   2 -29 1007.40   47.80
   4   2 -2816692.90  348.00
   4   2 -27 2486.50   79.00
   4   2 -26 3781.10   91.40
   4   2 -25   -9.50   19.10
   4   2 -24 1282.90   47.40
   4   2 -23   85.30   17.20
   4   2 -22 3489.60   83.10
   4   2 -21 8307.40  167.10
   4   2 -20  685.40   29.10
   4   2 -1916328.50  308.70
   4   2 -18  680.00   27.20
   4   2 -17 5790.10  122.10
   4   2 -16 1625.50   43.90
   4   2 -1515947.40  287.00
   4   2 -14  814.30   28.10
   4   2 -13 1184.70   29.80
   4   2 -12  231.80   11.20
   4   2 -1112880.70  185.50
   4   2 -1020678.10  259.40
   4   2  -9  416.20   11.00
   4   2  -8 6059.40   89.10
   4   2  -7   95.30    6.10
   4   2  -6 6337.70   92.10
   4   2  -5  158.00    6.60
   4   2  -4 2766.20   44.70
   4   2  -3 3998.10   65.00
   4   2  -2 3930.80   58.00
   4   2  -1 9053.10  121.30
   4   2   012044.20  170.70
   4   2   2   99.10    5.30
   4   2   3 3776.80   58.00
   4   2   4 1013.20   19.40
   4   2   5 7684.50  106.60
   4   2   6 2944.30   47.20
   4   2   7 5605.20   86.20
   4   2   8   17.70    5.50
   4   2   9  681.80   20.50
   4   2  10 1243.10   41.00
   4   2  12 1096.30   35.60
   4   2  1311969.80  253.50
   4   2  14 5267.40  126.60
   4   2  15  308.50   21.10
   4   2  1616990.50  351.60
   4   2  17 2839.00   71.80
   4   2  18  655.00   29.10
   4   2  19  137.30   18.00
   4   2  2012456.10  260.80
   4   2  21  -14.50   16.30
   4   2  22  900.60   36.80
   4   2  23  439.00   30.70
   4   2  24 1693.50   56.40
   4   2  25 6149.30  162.00
   4   2  26 3250.70  100.40
   4   2  27 1849.00   68.20
   4   2  28  375.50   31.10
   4   2  29  619.20   39.90
   4   2  30  208.20   29.00
   4   2  31 2726.80  101.80
   4   2  32  243.50   32.80
   4   2  33  436.10   36.00
   4   2  34   30.10   25.20
   4   3 -36  187.60   28.80
   4   3 -35  171.60   29.20
   4   3 -34   83.60   21.90
   4   3 -33 1427.70   63.00
   4   3 -32  489.90   35.80
   4   3 -31  509.40   33.90
   4   3 -30  223.50   29.40
   4   3 -29  382.50   30.40
   4   3 -28  513.60   32.90
   4   3 -27    4.30   19.20
   4   3 -26   74.20   18.20
   4   3 -25  439.50   27.50
   4   3 -24  972.40   35.70
   4   3 -23   20.50   17.70
   4   3 -22 4253.80   92.90
   4   3 -21 1971.70   52.30
   4   3 -20   18.30   13.80
   4   3 -19    0.10   12.20
   4   3 -18   58.50   14.60
   4   3 -17   89.30   14.00
   4   3 -16 2162.80   54.40
   4   3 -15  628.50   26.30
   4   3 -14   24.80    9.80
   4   3 -13 3257.00   64.70
   4   3 -12 7815.60  140.00
   4   3 -11   45.60    7.20
   4   3 -10 5579.20   79.40
   4   3  -9 3037.60   47.00
   4   3  -8  319.80    9.30
   4   3  -7 6690.80   90.30
   4   3  -6   60.50    5.10
   4   3  -515427.90  241.40
   4   3  -4 1271.30   24.20
   4   3  -320768.20  310.40
   4   3  -2 2953.40   48.10
   4   3   0 8125.00  111.10
   4   3   1 3922.00   56.30
   4   3   224125.00  896.50
   4   3   3  767.10   15.90
   4   3   430788.80  529.20
   4   3   5 6417.70   90.10
   4   3   6   64.40    5.20
   4   3   716597.50  226.20
   4   3   8 7657.60  112.70
   4   3   9 1990.70   44.90
   4   3  10 4400.60  114.10
   4   3  11   13.80   10.60
   4   3  12 3095.00   80.00
   4   3  1310353.00  217.20
   4   3  14  583.10   26.00
   4   3  15  990.60   36.60
   4   3  16  129.10   16.00
   4   3  17  807.00   34.30
   4   3  18   88.60   14.00
   4   3  19    3.80   16.30
   4   3  20 1748.60   54.80
   4   3  21 4681.20  115.40
   4   3  22 1609.80   55.10
   4   3  23   18.10   18.60
   4   3  24 2897.40   85.20
   4   3  25 2786.50   82.30
   4   3  26 3987.90  109.60
   4   3  27 2729.60   87.90
   4   3  28  247.40   27.30
   4   3  29 2118.40   77.50
   4   3  30   82.60   25.70
   4   3  31  122.40   26.10
   4   3  32 4786.50  144.50
   4   3  33  475.60   37.90
   4   3  34 1494.20   87.00
   4   4 -36  110.70   27.10
   4   4 -35  935.40   46.80
   4   4 -34  238.10   34.30
   4   4 -33 2206.60   77.40
   4   4 -32   17.10   23.70
   4   4 -31  324.00   32.40
   4   4 -30  163.00   24.70
   4   4 -29 2308.90   79.70
   4   4 -28 2949.30   89.70
   4   4 -27 2054.00   65.10
   4   4 -26   62.20   19.00
   4   4 -25  395.10   27.50
   4   4 -24 9800.80  196.50
   4   4 -23  907.40   36.50
   4   4 -22  426.40   22.30
   4   4 -21 1462.60   42.20
   4   4 -20  535.30   22.40
   4   4 -1910267.50  195.20
   4   4 -18 1994.80   51.10
   4   4 -17  354.60   19.10
   4   4 -16 1241.20   38.40
   4   4 -15   29.10   12.30
   4   4 -14  377.50   14.20
   4   4 -13 3894.90   75.50
   4   4 -12  885.60   24.30
   4   4 -11 6062.90  104.50
   4   4 -10   36.00    6.10
   4   4  -9  774.00   16.00
   4   4  -8   75.40    5.10
   4   4  -7  396.60   10.20
   4   4  -6 1965.60   32.40
   4   4  -5 3071.40   47.10
   4   4  -4 4378.90   67.90
   4   4  -3 1101.40   25.10
   4   4  -2  133.10    7.40
   4   4  -1 4168.00   60.40
   4   4   014487.80  216.40
   4   4   1 5956.00   83.10
   4   4   3 3602.00   58.90
   4   4   4 5064.10   77.10
   4   4   5 9282.20  129.50
   4   4   6  667.50   14.80
   4   4   7 4394.70   65.50
   4   4   8   51.60    6.70
   4   4   914255.30  237.60
   4   4  10 5384.20  121.90
   4   4  11 9612.70  197.90
   4   4  12 6868.40  143.10
   4   4  13  807.00   28.20
   4   4  14 1506.90   41.70
   4   4  15 4069.80  100.80
   4   4  16 1351.10   42.30
   4   4  17 2549.10   63.80
   4   4  18 3055.50   72.70
   4   4  19 7500.90  166.10
   4   4  2049205.20  882.40
   4   4  21 9508.20  207.40
   4   4  2220396.60  404.00
   4   4  23  367.60   25.40
   4   4  24  601.30   32.50
   4   4  25  272.80   26.80
   4   4  26 1529.50   57.20
   4   4  27  304.50   28.20
   4   4  28  735.20   41.20
   4   4  29  625.60   39.60
   4   4  30  520.20   39.00
   4   4  31  698.60   45.50
   4   4  32  533.30   40.40
   4   4  33  259.90   28.20
   4   4  34  309.70   43.90
   4   5 -36  117.70   39.80
   4   5 -35  192.90   29.60
   4   5 -34  942.80   48.20
   4   5 -33   73.70   22.10
   4   5 -32   22.70   23.60
   4   5 -31  136.90   27.60
   4   5 -30  889.70   42.50
   4   5 -29  784.40   39.10
   4   5 -28 1277.90   50.70
   4   5 -27   36.70   19.40
   4   5 -26 1471.60   49.70
   4   5 -25 1633.60   51.80
   4   5 -24 8463.60  173.30
   4   5 -23   33.80   20.60
   4   5 -2221912.10  403.60
   4   5 -21 2141.70   57.50
   4   5 -20  202.20   19.30
   4   5 -19   50.40   13.10
   4   5 -18 1855.60   50.40
   4   5 -1715495.80  296.30
   4   5 -1630314.40  547.40
   4   5 -1512120.40  244.30
   4   5 -1412379.50  210.30
   4   5 -13  406.20   15.30
   4   5 -12 5813.60  107.80
   4   5 -11 6792.20  120.40
   4   5 -10 4294.20   71.80
   4   5  -9 4709.20   75.20
   4   5  -8 8759.90  119.30
   4   5  -7   36.70    4.80
   4   5  -6 1132.40   20.60
   4   5  -5  183.20    6.00
   4   5  -413728.20  187.70
   4   5  -3 1678.30   24.50
   4   5  -2   30.60    2.50
   4   5  -1 4050.80   57.30
   4   5   0  396.20    8.90
   4   5   1  460.50    9.60
   4   5   243895.40 1477.00
   4   5   320388.40  298.90
   4   5   424171.00  354.20
   4   5   5 8328.30  117.70
   4   5   6 7863.10  111.20
   4   5   7  478.60   13.30
   4   5   8 3864.70   66.20
   4   5   9 4147.80   82.70
   4   5  10 3824.30   86.00
   4   5  11 1107.20   31.20
   4   5  12  617.30   22.40
   4   5  13 9327.40  184.60
   4   5  14   24.70   11.80
   4   5  15   21.30   12.70
   4   5  16  408.30   19.80
   4   5  17 2743.80   65.00
   4   5  1821093.70  384.60
   4   5  19  169.30   19.70
   4   5  2013020.70  254.60
   4   5  21 1200.00   43.10
   4   5  22    4.30   18.20
   4   5  23 1240.60   45.90
   4   5  24  517.00   30.80
   4   5  25  461.00   32.10
   4   5  26  614.00   34.20
   4   5  27  257.10   27.10
   4   5  28 1747.50   62.10
   4   5  29   37.30   25.30
   4   5  30  249.00   30.20
   4   5  31   46.30   22.00
   4   5  32 1028.10   53.80
   4   5  33  284.60   30.80
   4   5  34  169.10   34.20
   4   6 -35   24.60   20.30
   4   6 -34   22.20   20.40
   4   6 -33  211.20   25.60
   4   6 -32  411.00   31.50
   4   6 -31  329.60   32.00
   4   6 -30 1745.30   65.20
   4   6 -29   90.50   21.80
   4   6 -28  322.20   26.60
   4   6 -27  720.50   35.40
   4   6 -26  220.00   22.20
   4   6 -25 1082.40   40.20
   4   6 -24 2193.20   63.90
   4   6 -23  228.00   21.40
   4   6 -22   -0.40   19.70
   4   6 -21  263.90   22.90
   4   6 -20   53.60   17.50
   4   6 -19  157.20   15.70
   4   6 -18  130.80   14.80
   4   6 -17  351.00   23.00
   4   6 -1617304.30  348.40
   4   6 -15  170.70   18.60
   4   6 -14 9775.50  170.20
   4   6 -13  102.50    9.50
   4   6 -12 9206.40  156.90
   4   6 -11  -10.70    5.90
   4   6 -1019677.40  269.80
   4   6  -9  278.70    9.50
   4   6  -8 5733.50   85.60
   4   6  -7 2650.50   41.20
   4   6  -619840.10  269.00
   4   6  -522588.00  320.80
   4   6  -413605.30  170.90
   4   6  -311898.40  162.90
   4   6  -2  334.80    8.00
   4   6  -1 7414.60  100.10
   4   6   041507.00 1045.50
   4   6   124046.80  385.10
   4   6   3 3017.90   46.40
   4   6   422832.90  309.10
   4   6   5 1074.60   20.90
   4   6   6  210.00    7.80
   4   6   7 1481.20   29.50
   4   6   810261.90  166.30
   4   6   9 1441.50   36.30
   4   6  10 9754.60  173.40
   4   6  11  255.60   14.00
   4   6  12   80.80   11.90
   4   6  13  134.30   14.90
   4   6  14  753.20   30.80
   4   6  15  805.10   30.80
   4   6  16  479.70   22.90
   4   6  17 5406.80  115.30
   4   6  18 9405.60  183.60
   4   6  19 3079.80   71.80
   4   6  2028540.40  514.00
   4   6  21 1626.60   57.40
   4   6  22 6191.80  150.50
   4   6  23 4963.70  125.20
   4   6  24 1611.80   57.70
   4   6  25  388.40   27.90
   4   6  26  138.70   24.80
   4   6  27   46.20   21.50
   4   6  28  -12.20   19.30
   4   6  29   69.90   21.90
   4   6  30 1397.50   59.30
   4   6  31  482.00   35.50
   4   6  32   16.30   23.00
   4   6  33   47.60   22.50
   4   7 -35  100.50   25.70
   4   7 -34  231.90   27.80
   4   7 -33  867.80   45.30
   4   7 -32  410.50   30.70
   4   7 -31    7.40   21.30
   4   7 -30  258.40   27.40
   4   7 -29  605.40   32.50
   4   7 -28  183.80   24.90
   4   7 -27   36.60   17.50
   4   7 -26  410.00   29.10
   4   7 -25  135.00   23.00
   4   7 -24 4218.50  107.10
   4   7 -23 6141.80  145.70
   4   7 -2210743.40  223.00
   4   7 -2113815.70  271.30
   4   7 -20  101.10   19.90
   4   7 -19  501.10   24.50
   4   7 -18   -7.20   13.20
   4   7 -17 1139.90   35.80
   4   7 -16 8747.90  189.80
   4   7 -15  494.20   23.30
   4   7 -14 3885.60   83.60
   4   7 -13 6614.30  119.60
   4   7 -12 1034.10   26.60
   4   7 -11 4838.50   81.30
   4   7 -10 3794.40   65.30
   4   7  -9 3880.40   61.10
   4   7  -8  455.40   11.60
   4   7  -7  132.10    7.00
   4   7  -625299.40  370.00
   4   7  -5 2865.10   42.80
   4   7  -4 3087.80   45.50
   4   7  -3 2265.80   36.20
   4   7  -2  790.40   15.80
   4   7  -1  621.30   12.80
   4   7   0 7375.40   99.80
   4   7   129871.70  775.10
   4   7   254095.80 1872.50
   4   7   3 7947.20  107.30
   4   7   419988.40  252.30
   4   7   5 2807.90   47.00
   4   7   6 4128.90   67.40
   4   7   7 7763.20  115.20
   4   7   8 7991.50  131.40
   4   7   9 8980.40  158.20
   4   7  10 1314.90   31.30
   4   7  11  964.00   28.80
   4   7  12 1647.50   44.90
   4   7  13  385.70   19.30
   4   7  14 6654.20  149.30
   4   7  15  502.80   23.70
   4   7  16 4389.10  104.30
   4   7  17 2090.50   57.80
   4   7  18 4184.60  100.90
   4   7  19 7792.40  167.30
   4   7  20 7072.60  148.80
   4   7  21 2488.70   72.30
   4   7  22 1055.50   40.60
   4   7  23 6114.60  144.20
   4   7  24  530.90   31.20
   4   7  25 1081.50   45.60
   4   7  26  496.50   35.70
   4   7  27  604.80   38.00
   4   7  28  190.40   28.70
   4   7  29  773.70   42.60
   4   7  30  -21.80   23.50
   4   7  31  484.40   36.70
   4   7  32  474.60   35.00
   4   7  33  846.70   50.60
   4   8 -35   24.50   25.60
   4   8 -34    0.20   25.90
   4   8 -33   22.90   21.90
   4   8 -32   76.30   18.80
   4   8 -31  131.30   26.40
   4   8 -30  989.40   48.30
   4   8 -29  233.80   28.30
   4   8 -28 4038.40  110.70
   4   8 -27 2456.10   73.80
   4   8 -26   50.70   19.60
   4   8 -25 2760.60   76.70
   4   8 -24 7667.80  178.80
   4   8 -23 1965.10   62.80
   4   8 -2210293.30  214.60
   4   8 -21  133.30   22.90
   4   8 -20 2531.40   72.10
   4   8 -19 7742.10  165.90
   4   8 -18  712.00   28.70
   4   8 -17 1341.30   44.80
   4   8 -16  770.40   30.10
   4   8 -15  525.60   23.30
   4   8 -1411418.40  199.20
   4   8 -13  661.00   21.70
   4   8 -12 3411.10   69.40
   4   8 -11 4021.40   71.60
   4   8 -10 5987.40   98.60
   4   8  -9 1606.00   31.40
   4   8  -811994.30  170.90
   4   8  -7 3960.40   62.30
   4   8  -6 1843.00   32.20
   4   8  -5   28.60    4.90
   4   8  -4   53.00    4.50
   4   8  -3  471.10   11.40
   4   8  -2   40.20    4.30
   4   8  -1 7856.10  105.30
   4   8   0 2337.50   36.40
   4   8   114649.40  189.00
   4   8   2  748.30   16.00
   4   8   3  518.80   12.10
   4   8   4   16.10    4.60
   4   8   5 8434.70  125.20
   4   8   6 1303.70   25.90
   4   8   7 1247.30   28.00
   4   8   810235.90  180.70
   4   8   9 1321.80   31.80
   4   8  10 7862.00  142.70
   4   8  11 6703.40  134.00
   4   8  12  301.60   16.70
   4   8  1315977.20  319.20
   4   8  14   13.90   14.50
   4   8  15 6748.40  156.40
   4   8  16  105.20   15.70
   4   8  17  476.50   24.90
   4   8  1814769.00  300.40
   4   8  1916461.60  336.60
   4   8  2029269.60  562.60
   4   8  21  309.20   27.60
   4   8  22 9846.40  218.20
   4   8  23 4489.80  115.70
   4   8  24   72.90   21.10
   4   8  25   -2.10   21.20
   4   8  26  342.20   31.80
   4   8  27  299.70   27.30
   4   8  28  276.20   29.10
   4   8  29  959.40   45.30
   4   8  30 2114.70   78.20
   4   8  31 1642.10   72.30
   4   8  32 1739.40   69.50
   4   8  33  196.80   32.20
   4   9 -34  531.50   37.50
   4   9 -33 1663.60   67.50
   4   9 -32   12.30   21.00
   4   9 -31  164.20   27.10
   4   9 -30 3045.00   92.00
   4   9 -29    8.30   25.20
   4   9 -28  921.20   42.30
   4   9 -27  -19.30   18.70
   4   9 -26    5.70   19.40
   4   9 -25 1505.30   46.70
   4   9 -24 1287.30   47.90
   4   9 -23  513.20   28.50
   4   9 -22 1839.70   58.10
   4   9 -21 2510.10   70.40
   4   9 -20  421.10   25.20
   4   9 -19  384.70   25.70
   4   9 -18 3181.40   81.50
   4   9 -17 3747.10   90.60
   4   9 -16  190.00   16.90
   4   9 -15   35.70   13.60
   4   9 -14 1634.90   45.70
   4   9 -13 1789.50   42.40
   4   9 -1226926.80  430.40
   4   9 -11 5142.60   84.30
   4   9 -10 4207.90   73.00
   4   9  -9  410.30   12.80
   4   9  -816104.30  224.40
   4   9  -7 2722.00   45.20
   4   9  -6 8308.00  118.60
   4   9  -5 8208.90  116.80
   4   9  -4  627.40   13.90
   4   9  -319796.60  257.40
   4   9  -2 1433.50   24.10
   4   9  -117889.50  234.80
   4   9   0 5865.90   83.40
   4   9   1   49.80    4.00
   4   9   2 5758.20   84.90
   4   9   3 9403.20  133.30
   4   9   4 4145.10   70.10
   4   9   5 8628.80  127.20
   4   9   6 1875.70   35.30
   4   9   7 1910.30   41.40
   4   9   832204.00  514.00
   4   9   9 9166.80  162.70
   4   9  10 8933.00  158.60
   4   9  11 5772.40  119.90
   4   9  12 3502.90   80.70
   4   9  13  898.90   31.80
   4   9  14 4009.20  100.70
   4   9  15 1040.40   33.20
   4   9  16  387.10   21.40
   4   9  17  884.30   33.20
   4   9  18 1632.50   50.80
   4   9  19   57.10   19.70
   4   9  20 3970.00  107.40
   4   9  21  678.40   36.80
   4   9  22  517.70   32.30
   4   9  23  196.90   23.80
   4   9  24 9581.50  222.00
   4   9  25   92.10   22.10
   4   9  26 7038.30  189.20
   4   9  27  773.70   43.50
   4   9  28  179.70   27.00
   4   9  29 2021.10   72.10
   4   9  30  291.90   31.00
   4   9  31 2796.70   99.50
   4   9  32  630.50   39.40
   4  10 -34    6.90   22.90
   4  10 -33  684.70   49.50
   4  10 -32   99.40   23.70
   4  10 -31 1107.90   46.10
   4  10 -30 5296.60  145.50
   4  10 -29 6442.80  168.30
   4  10 -28 8379.30  198.20
   4  10 -27  915.30   43.60
   4  10 -26 1393.10   52.70
   4  10 -25 2088.70   66.10
   4  10 -24    9.30   20.50
   4  10 -23 1915.70   62.60
   4  10 -22 1315.30   44.60
   4  10 -21 1878.90   57.10
   4  10 -20  138.50   19.50
   4  10 -19 1141.60   39.60
   4  10 -18   12.90   18.00
   4  10 -17 2065.60   56.10
   4  10 -16 1109.30   34.10
   4  10 -15 4957.40  108.80
   4  10 -14 2055.10   56.20
   4  10 -13 9051.70  164.20
   4  10 -12   37.40   10.40
   4  10 -11   14.80    8.10
   4  10 -1032908.60  457.50
   4  10  -932032.30  490.80
   4  10  -830283.80  438.20
   4  10  -730206.40  393.50
   4  10  -6 3778.60   57.00
   4  10  -5 2638.80   43.00
   4  10  -4  850.10   16.30
   4  10  -3 3605.30   54.20
   4  10  -2 7123.20  122.10
   4  10  -1 1151.90   25.90
   4  10   0 7432.70  128.90
   4  10   1 6087.00  109.40
   4  10   2   41.10    4.10
   4  10   3 1115.20   20.30
   4  10   4  277.10    9.00
   4  10   5 5050.50   78.80
   4  10   6   45.90    6.00
   4  10   7 4346.20   82.50
   4  10   8 8971.70  152.90
   4  10   9  378.80   15.40
   4  10  1013135.20  226.80
   4  10  11 3873.40   89.60
   4  10  12  944.00   34.00
   4  10  1312064.10  239.70
   4  10  14  337.80   20.50
   4  10  15 2670.20   69.60
   4  10  16 2716.30   68.30
   4  10  17  377.00   21.00
   4  10  18 1031.60   36.30
   4  10  19 1070.30   40.50
   4  10  20  999.00   44.80
   4  10  21 3370.00   99.30
   4  10  22   94.20   20.70
   4  10  23  200.90   25.70
   4  10  24 1400.40   53.20
   4  10  2511278.30  262.50
   4  10  26 5141.80  141.40
   4  10  27 5261.90  149.20
   4  10  28  811.50   42.90
   4  10  29  -31.00   17.50
   4  10  30  262.30   30.10
   4  10  31   58.10   22.40
   4  10  32  707.90   46.60
   4  11 -33  104.50   20.60
   4  11 -32  467.40   38.00
   4  11 -31   61.00   24.00
   4  11 -30   17.10   23.20
   4  11 -29  566.90   35.80
   4  11 -28 4749.90  134.20
   4  11 -27   96.30   26.00
   4  11 -26 3052.50   84.10
   4  11 -25 1747.60   60.70
   4  11 -24  574.30   33.40
   4  11 -23  157.50   20.00
   4  11 -22    6.30   17.50
   4  11 -21 1289.30   45.10
   4  11 -20 1150.20   41.20
   4  11 -19  295.60   20.90
   4  11 -18  400.90   20.20
   4  11 -17 2796.70   68.00
   4  11 -16 1342.10   39.90
   4  11 -15  237.80   16.90
   4  11 -14 1274.10   38.00
   4  11 -1322259.10  398.10
   4  11 -1222309.30  358.30
   4  11 -1117704.70  262.60
   4  11 -1023703.90  332.00
   4  11  -9  253.60   10.20
   4  11  -8  776.30   16.40
   4  11  -7 4208.20   65.00
   4  11  -6 5563.20   82.80
   4  11  -5 4723.90   69.10
   4  11  -4   82.10    6.30
   4  11  -3  439.00   15.30
   4  11  -2   40.80    7.70
   4  11  -1 2424.00   50.10
   4  11   0 1687.50   35.10
   4  11   1  306.60   12.10
   4  11   2  316.50   12.40
   4  11   312116.40  168.00
   4  11   4 3171.70   53.00
   4  11   5 5190.60   82.20
   4  11   634740.00  732.60
   4  11   714752.40  325.00
   4  11   875172.70 2485.40
   4  11   961870.00 2119.20
   4  11  10 9110.40  163.30
   4  11  11 5135.00  116.40
   4  11  12  388.70   21.00
   4  11  13 8515.40  182.40
   4  11  14 3764.20   94.90
   4  11  15 2636.60   70.20
   4  11  16  180.90   18.30
   4  11  17   -2.90   15.00
   4  11  18 2060.80   60.30
   4  11  19   32.80   15.80
   4  11  20  844.40   38.90
   4  11  21    3.20   17.30
   4  11  22  825.70   39.40
   4  11  23   45.70   20.90
   4  11  24   47.70   20.20
   4  11  25   21.50   19.90
   4  11  26   63.50   21.70
   4  11  27  120.70   23.80
   4  11  28  134.00   25.80
   4  11  29  230.20   28.50
   4  11  30    9.50   22.30
   4  11  31  719.10   43.20
   4  12 -33  332.90   40.40
   4  12 -32    9.80   19.80
   4  12 -31 2068.90   76.90
   4  12 -30  981.50   47.80
   4  12 -29 1436.50   56.00
   4  12 -28 1848.40   66.00
   4  12 -27   94.20   22.40
   4  12 -26 1653.50   55.80
   4  12 -25 2525.80   73.70
   4  12 -24 1209.00   47.00
   4  12 -23 3856.30  100.70
   4  12 -22  149.20   21.10
   4  12 -21   67.30   18.40
   4  12 -20  205.50   20.50
   4  12 -19 2140.10   61.10
   4  12 -18   29.00   13.70
   4  12 -17 2756.40   69.40
   4  12 -16   68.10   13.60
   4  12 -15 8032.50  165.00
   4  12 -14   54.90   12.80
   4  12 -13  624.40   24.50
   4  12 -1212712.90  221.60
   4  12 -11  607.50   18.40
   4  12 -1055594.40  939.40
   4  12  -917927.00  261.30
   4  12  -813863.40  195.30
   4  12  -7 8390.60  120.50
   4  12  -6  158.80    8.70
   4  12  -5 8478.90  117.60
   4  12  -4  524.90   10.80
   4  12  -311943.10  195.80
   4  12  -2  125.90    9.40
   4  12  -1 9156.80  149.30
   4  12   0 5854.00  102.40
   4  12   1   96.80    8.70
   4  12   214091.40  240.10
   4  12   3  110.10    9.90
   4  12   4 3334.20   54.50
   4  12   5  903.00   21.60
   4  12   613079.30  232.40
   4  12   7  471.70   16.20
   4  12   818681.50  314.20
   4  12   9  847.10   30.10
   4  12  10  145.10   11.70
   4  12  11 2459.50   61.80
   4  12  12  442.80   20.70
   4  12  13   -1.80   16.10
   4  12  14  876.60   34.90
   4  12  15   40.90   14.00
   4  12  16 1099.80   36.40
   4  12  17 4087.00  104.20
   4  12  18 1214.00   43.20
   4  12  19  268.50   21.20
   4  12  20   23.80   18.00
   4  12  21  809.20   39.10
   4  12  22  844.90   40.80
   4  12  23   67.80   22.90
   4  12  24  742.70   40.10
   4  12  25  658.00   35.50
   4  12  26  347.30   30.00
   4  12  27  271.80   24.40
   4  12  28   99.70   19.30
   4  12  29  667.80   44.20
   4  12  30  375.10   31.00
   4  12  31 1191.10   60.10
   4  13 -32  -36.80   31.80
   4  13 -31 1354.70   70.60
   4  13 -30   75.00   26.60
   4  13 -29  563.60   34.40
   4  13 -28 1418.30   61.20
   4  13 -27 1922.90   69.50
   4  13 -26  310.20   26.10
   4  13 -25  386.50   27.80
   4  13 -24 1504.00   54.50
   4  13 -23   46.60   19.90
   4  13 -22 5179.50  130.00
   4  13 -21   10.40   18.20
   4  13 -20 1087.80   41.00
   4  13 -19  272.30   20.40
   4  13 -18  134.60   16.20
   4  13 -17  560.80   25.60
   4  13 -16  138.20   15.20
   4  13 -15 1084.20   35.20
   4  13 -14   33.10   13.10
   4  13 -13 7239.70  148.10
   4  13 -12 4643.10   88.60
   4  13 -11  657.40   19.20
   4  13 -1011011.50  164.00
   4  13  -9 5700.10  101.80
   4  13  -8 5285.30   81.50
   4  13  -7 1129.10   22.90
   4  13  -6  481.30   12.40
   4  13  -5 2362.10   37.50
   4  13  -4 2208.50   47.30
   4  13  -3   20.90    7.30
   4  13  -2 4545.70   81.90
   4  13  -1 5366.30   96.20
   4  13   0   56.50    8.50
   4  13   1 7202.90  129.40
   4  13   2  353.00   14.50
   4  13   3 3459.30   73.50
   4  13   4  390.90   16.80
   4  13   5 4318.50   76.40
   4  13   6 2051.70   45.00
   4  13   7 3046.20   62.60
   4  13   8 5043.60   95.80
   4  13   9 2494.30   55.20
   4  13  10 2853.40   64.20
   4  13  11   52.30   11.80
   4  13  12 4778.20  109.30
   4  13  1315558.60  302.50
   4  13  14 6972.70  160.30
   4  13  15 5717.10  136.80
   4  13  16  120.70   16.00
   4  13  17 4892.50  120.40
   4  13  18 3531.20   90.60
   4  13  19  851.80   34.60
   4  13  20 2165.90   67.60
   4  13  21 3505.70   99.60
   4  13  22  519.70   32.00
   4  13  23  648.60   35.70
   4  13  24 1712.50   65.30
   4  13  25 1589.70   62.00
   4  13  26  -13.00   20.90
   4  13  27 1732.60   63.90
   4  13  28  676.70   43.70
   4  13  29  367.00   35.60
   4  13  30 1131.50   50.10
   4  14 -31 1958.50   84.90
   4  14 -30 1989.80   93.70
   4  14 -29  178.00   34.10
   4  14 -28 2093.40   71.90
   4  14 -27  586.60   34.50
   4  14 -26   29.60   19.60
   4  14 -25   39.50   19.70
   4  14 -24  832.60   39.40
   4  14 -23 1037.90   43.80
   4  14 -22   -8.90   17.30
   4  14 -21 2179.80   65.20
   4  14 -20   69.30   17.40
   4  14 -19   -8.00   16.10
   4  14 -18 1540.30   49.70
   4  14 -17  559.70   25.20
   4  14 -16 2281.50   62.60
   4  14 -15 2970.90   73.20
   4  14 -14 1110.20   36.00
   4  14 -13 1359.40   41.00
   4  14 -12  295.90   18.80
   4  14 -11   97.40    8.70
   4  14 -10  431.60   15.60
   4  14  -9 6623.10  104.30
   4  14  -8   84.50    7.30
   4  14  -7 4257.80   65.30
   4  14  -6   96.10    5.80
   4  14  -5  205.90   11.50
   4  14  -4 1354.50   33.60
   4  14  -3   56.10    9.60
   4  14  -2 2521.00   54.00
   4  14  -1  417.70   15.60
   4  14   011018.50  192.40
   4  14   1 2034.40   47.40
   4  14   2 6436.10  126.30
   4  14   3 4381.70  100.90
   4  14   4  125.00   12.60
   4  14   5 4869.00  109.40
   4  14   6 3043.60   62.50
   4  14   7 1254.60   31.40
   4  14   8  680.70   20.10
   4  14   9 4449.40   89.50
   4  14  10  631.60   23.50
   4  14  11 9304.70  200.40
   4  14  12  722.30   28.60
   4  14  13 2373.40   64.00
   4  14  14 3953.40  118.00
   4  14  15 4506.50  112.70
   4  14  16 2965.10   84.40
   4  14  17 2291.90   67.50
   4  14  18   -6.70   14.40
   4  14  19 2096.20   63.60
   4  14  20 5876.70  139.90
   4  14  21  235.20   24.70
   4  14  22 4805.00  131.60
   4  14  23 1440.10   59.60
   4  14  24   31.10   20.00
   4  14  25  491.80   32.60
   4  14  26    1.80   16.90
   4  14  27  512.90   38.10
   4  14  28  616.30   44.80
   4  14  29   -4.70   22.10
   4  15 -31   19.90   26.20
   4  15 -30   14.60   26.40
   4  15 -29   26.20   28.30
   4  15 -28  284.90   32.30
   4  15 -27 1099.50   49.10
   4  15 -26    0.50   24.80
   4  15 -25 2530.80   78.30
   4  15 -24  318.80   27.10
   4  15 -23  413.10   29.70
   4  15 -22 4443.60  117.00
   4  15 -21  489.60   32.20
   4  15 -20 4305.40  112.60
   4  15 -19  327.00   22.90
   4  15 -18 8938.70  202.30
   4  15 -17 2521.60   69.40
   4  15 -16 3017.40   73.50
   4  15 -15  243.70   17.60
   4  15 -14 1370.80   40.10
   4  15 -1312429.10  253.50
   4  15 -12  967.60   33.80
   4  15 -11 9619.80  170.00
   4  15 -10   83.60   10.10
   4  15  -9 4847.40   88.90
   4  15  -8 2484.40   43.70
   4  15  -7 3334.20   54.30
   4  15  -6 2137.40   48.90
   4  15  -5   40.00    8.80
   4  15  -4 8577.90  157.40
   4  15  -3 2246.50   51.30
   4  15  -2  211.60   12.00
   4  15  -1   33.60   10.70
   4  15   0 8955.20  170.60
   4  15   1 1261.40   37.00
   4  15   2  399.00   19.50
   4  15   3   27.20   10.60
   4  15   4 1878.70   62.90
   4  15   5 5073.10  124.70
   4  15   6  432.60   24.30
   4  15   7 1442.90   33.70
   4  15   8  112.50   13.00
   4  15   9 3460.00   81.20
   4  15  10 4615.30  109.10
   4  15  11  568.40   24.10
   4  15  12 3474.60   86.80
   4  15  13  670.90   27.40
   4  15  14 3772.90   96.50
   4  15  15  249.40   20.80
   4  15  16 3854.40  101.10
   4  15  17   17.90   16.40
   4  15  18 2493.40   83.50
   4  15  19 1568.90   53.20
   4  15  20   23.20   17.70
   4  15  21  366.30   28.10
   4  15  22 2889.90   97.20
   4  15  23  407.50   29.90
   4  15  24  275.20   24.20
   4  15  25 1603.30   66.60
   4  15  26   56.40   26.00
   4  15  27  795.10   52.50
   4  15  28  180.00   28.80
   4  15  29   12.80   24.40
   4  16 -30   -6.00   36.80
   4  16 -29 1086.80   60.40
   4  16 -28  285.80   34.50
   4  16 -27  172.80   28.40
   4  16 -26  -33.80   23.40
   4  16 -25   91.60   26.50
   4  16 -24   93.70   26.40
   4  16 -23  331.70   26.60
   4  16 -22 1812.70   61.40
   4  16 -21  553.70   33.20
   4  16 -20  549.60   31.40
   4  16 -19  349.50   25.80
   4  16 -18 2400.80   71.00
   4  16 -17  578.60   28.30
   4  16 -16 2162.70   60.10
   4  16 -15  644.70   27.80
   4  16 -14 2685.90   69.10
   4  16 -13 1294.40   42.00
   4  16 -12  745.50   28.30
   4  16 -11  545.70   23.00
   4  16 -10   81.90   12.30
   4  16  -9 6208.00  130.70
   4  16  -8 1845.10   41.10
   4  16  -7 2759.60   69.40
   4  16  -6  440.60   19.00
   4  16  -5 3850.90   89.90
   4  16  -411948.80  236.10
   4  16  -3 2878.50   63.30
   4  16  -217559.00  298.70
   4  16  -1 7354.60  155.40
   4  16   029733.90  624.80
   4  16   112277.20  243.30
   4  16   217074.60  322.80
   4  16   3  103.30   16.50
   4  16   4  116.80   12.80
   4  16   5 8859.10  206.90
   4  16   6 2149.00   63.60
   4  16   7 6882.00  168.20
   4  16   8  141.60   19.40
   4  16   9 1993.50   56.70
   4  16  10 6732.10  148.10
   4  16  11  343.40   19.60
   4  16  12 1588.50   46.90
   4  16  13 2393.30   70.00
   4  16  14 2459.40   69.60
   4  16  15   23.10   17.90
   4  16  16 1059.10   42.00
   4  16  17 2731.90   91.90
   4  16  18  123.70   22.10
   4  16  19  519.50   34.20
   4  16  20 1540.40   67.70
   4  16  21 4749.70  157.10
   4  16  22 4286.80  133.90
   4  16  23 1978.60   81.40
   4  16  24   39.30   17.60
   4  16  25  344.60   40.50
   4  16  26  -18.00   30.90
   4  16  27  347.20   39.90
   4  16  28   31.20   26.90
   4  17 -28   76.50   72.10
   4  17 -27  -12.60   50.70
   4  17 -26  724.00   75.10
   4  17 -25 1095.30  132.30
   4  17 -24   13.30   27.80
   4  17 -23  680.50   47.30
   4  17 -22 2578.60  100.40
   4  17 -21 9900.10  290.50
   4  17 -20 5546.00  171.00
   4  17 -19   35.70   16.20
   4  17 -1816075.80  349.80
   4  17 -1711985.40  264.50
   4  17 -1614632.30  303.60
   4  17 -15 7321.90  170.60
   4  17 -14  365.20   19.70
   4  17 -13   96.20   14.20
   4  17 -12  339.80   20.10
   4  17 -11 4338.50  101.10
   4  17 -10 3725.90   88.20
   4  17  -9  201.90   14.00
   4  17  -8 5310.50  137.60
   4  17  -7 1364.20   46.90
   4  17  -6 1877.50   59.80
   4  17  -5 1405.90   48.40
   4  17  -4 7845.70  193.20
   4  17  -3 1416.90   47.30
   4  17  -2 5031.10  135.30
   4  17  -1   47.40   12.90
   4  17   0  615.20   28.90
   4  17   1 3499.00   92.00
   4  17   2  621.60   37.70
   4  17   3 2027.80   62.00
   4  17   4   46.60   15.60
   4  17   510034.60  238.20
   4  17   6 2132.20   63.50
   4  17   7  145.90   17.70
   4  17   8  153.80   20.00
   4  17   9  297.10   22.00
   4  17  10  666.30   31.80
   4  17  11 2325.00   73.70
   4  17  12  385.10   26.40
   4  17  13 4596.90  131.30
   4  17  14 3943.50  118.60
   4  17  15   39.10   17.80
   4  17  16 2910.00   96.10
   4  17  17 5280.70  153.90
   4  17  18 3550.30  114.20
   4  17  19 1768.10   78.00
   4  17  20 2752.90   98.40
   4  17  21  197.90   27.30
   4  17  22  465.60   35.40
   4  17  23  163.10   26.50
   4  17  24 1808.90   81.40
   4  17  25  137.30   30.70
   4  17  26  434.40   41.60
   4  17  27   44.10   21.00
   4  18 -27  763.00   97.80
   4  18 -26  301.10   83.90
   4  18 -25 2405.70  182.60
   4  18 -24  115.10   56.70
   4  18 -23  107.50   59.10
   4  18 -22  143.10   55.50
   4  18 -21   23.90   56.70
   4  18 -20 1794.60  161.40
   4  18 -19  437.30   81.00
   4  18 -18   -4.50   43.60
   4  18 -17 1225.70  125.60
   4  18 -16 3360.70  132.20
   4  18 -15  141.50   22.20
   4  18 -14 1557.10   62.20
   4  18 -13  656.50   32.40
   4  18 -12 1186.00   48.90
   4  18 -11  124.40   17.40
   4  18 -10 4547.50  124.40
   4  18  -9   37.50   13.70
   4  18  -8 1642.10   53.30
   4  18  -7  157.50   15.70
   4  18  -6  971.50   37.90
   4  18  -511684.60  270.10
   4  18  -4 7708.70  179.50
   4  18  -310863.80  245.80
   4  18  -210552.90  244.90
   4  18  -1 8837.40  207.60
   4  18   012864.50  282.90
   4  18   125383.50  693.90
   4  18   2 8433.50  199.90
   4  18   3 3791.00  102.40
   4  18   4  114.50   15.50
   4  18   5 3100.20   95.80
   4  18   6 2467.10   77.40
   4  18   7 1128.40   42.90
   4  18   8  574.50   32.30
   4  18   9   16.20   15.00
   4  18  10  294.50   22.90
   4  18  11   21.70   12.60
   4  18  12 1569.50   60.30
   4  18  13   69.70   18.20
   4  18  14   99.60   19.20
   4  18  15  311.60   27.30
   4  18  16 3811.60  116.40
   4  18  17 1954.30   77.90
   4  18  18 1467.10   62.80
   4  18  19 2384.50   88.00
   4  18  20  202.10   26.80
   4  18  21 1408.20   60.40
   4  18  22   14.90   22.60
   4  18  23 3150.30  129.40
   4  18  24  282.90   35.00
   4  18  25   36.00   28.90
   4  18  26 1221.10   59.10
   4  19 -26   23.50   45.50
   4  19 -25  367.90   84.00
   4  19 -24  -46.80   56.50
   4  19 -23 1412.40  112.40
   4  19 -22  788.80   91.00
   4  19 -21 3461.50  241.00
   4  19 -20 2689.80  192.60
   4  19 -19  383.40   72.70
   4  19 -18 1508.90  135.60
   4  19 -17 2249.40  174.30
   4  19 -16   19.50   54.30
   4  19 -15   49.80   52.30
   4  19 -14 1245.80  100.50
   4  19 -13  370.50   65.00
   4  19 -12 3943.40  156.30
   4  19 -11 1786.30   78.60
   4  19 -10 1215.00   61.90
   4  19  -9 3139.20  121.20
   4  19  -8  126.60   22.10
   4  19  -7   73.00   21.40
   4  19  -6 3781.20  127.90
   4  19  -5 2105.50   84.40
   4  19  -4 5016.00  172.10
   4  19  -3  360.90   29.20
   4  19  -2   11.70   18.50
   4  19  -1 1561.60   67.00
   4  19   0 8222.60  250.10
   4  19   1 3052.10   88.80
   4  19   2 5328.20  138.50
   4  19   3   -1.30   13.20
   4  19   4  782.90   38.80
   4  19   5 5570.00  151.10
   4  19   6   65.70   15.00
   4  19   7 1028.40   45.50
   4  19   8  236.40   21.40
   4  19   9   28.20   14.10
   4  19  10  258.40   21.50
   4  19  11  265.30   21.10
   4  19  12 1619.30   64.80
   4  19  13   28.10   16.50
   4  19  14 1880.50   72.70
   4  19  15    8.50   19.10
   4  19  16   21.30   21.50
   4  19  17 2460.10   97.30
   4  19  18  232.90   29.70
   4  19  19 4212.20  176.90
   4  19  20  356.30   38.30
   4  19  21 2445.50  118.90
   4  19  22  150.40   34.30
   4  19  23 3347.80  161.50
   4  19  24  -12.00   31.40
   4  19  25   95.40   32.60
   4  20 -25  772.00   90.80
   4  20 -24   98.30   61.20
   4  20 -23  285.80   64.60
   4  20 -22 1008.70  115.80
   4  20 -21  -29.10   41.60
   4  20 -20  830.20  102.70
   4  20 -19 1789.00  158.90
   4  20 -18  -11.70   58.20
   4  20 -17  327.90   64.30
   4  20 -16  271.70   57.20
   4  20 -15  320.80   75.30
   4  20 -14  103.70   66.10
   4  20 -13 2430.80  182.50
   4  20 -12 1139.50  124.70
   4  20 -11 3001.70  182.80
   4  20 -10 1177.10  101.10
   4  20  -9  727.00   80.60
   4  20  -8 4479.30  160.70
   4  20  -7 2613.80  113.90
   4  20  -6 7737.80  258.60
   4  20  -5 2914.90  110.20
   4  20  -4  992.10   51.00
   4  20  -3   89.30   22.00
   4  20  -2 5174.50  169.00
   4  20  -1 2091.70   85.20
   4  20   0 2098.10   89.90
   4  20   1 1117.30   55.70
   4  20   2 1264.40   61.10
   4  20   3  160.50   27.10
   4  20   4  616.40   43.40
   4  20   5 4245.10  160.10
   4  20   6  373.80   39.20
   4  20   7 1095.70   64.20
   4  20   8 1184.50   64.30
   4  20   9 1250.80   74.30
   4  20  10 4934.00  181.60
   4  20  11 1477.00   77.40
   4  20  12  813.80   53.80
   4  20  13  438.20   37.40
   4  20  14   24.30   30.10
   4  20  15 2150.50  101.20
   4  20  16  168.10   35.40
   4  20  17  104.30   31.40
   4  20  18 1517.30   90.30
   4  20  19  862.10   54.00
   4  20  20  495.20   50.80
   4  20  21  146.70   39.40
   4  20  22  604.80   58.70
   4  20  23  893.40   60.80
   4  21 -24 1529.50  139.40
   4  21 -23    7.30   42.50
   4  21 -22 1565.20  151.40
   4  21 -21   14.00   44.40
   4  21 -20 1819.90  134.70
   4  21 -19  224.80   55.10
   4  21 -18 2045.20  152.70
   4  21 -17  362.30   51.30
   4  21 -16   70.00   49.60
   4  21 -15  416.80   76.60
   4  21 -14 1688.40  156.60
   4  21 -13 1449.40  135.20
   4  21 -12 3383.50  227.20
   4  21 -11   76.70   53.80
   4  21 -10   47.60   52.70
   4  21  -9  950.60   91.50
   4  21  -8 2231.40  163.60
   4  21  -7  188.10   53.30
   4  21  -6 1053.10   92.70
   4  21  -5   84.10   47.30
   4  21  -4  891.20   51.80
   4  21  -3  278.80   30.60
   4  21  -2  569.80   41.80
   4  21  -1  803.90   51.70
   4  21   0   60.20   21.70
   4  21   1  647.90   40.20
   4  21   2 2434.90  100.30
   4  21   3 4515.60  165.70
   4  21   4  114.30   26.10
   4  21   5 3402.70  139.10
   4  21   6 1268.80   67.30
   4  21   7   20.80   23.70
   4  21   8 5107.10  187.80
   4  21   9 4169.20  167.50
   4  21  1013642.50  429.60
   4  21  11 1306.10   69.00
   4  21  12 7473.10  276.40
   4  21  13  111.00   31.60
   4  21  14 1413.00   83.00
   4  21  15  103.30   32.60
   4  21  16 1386.40   82.20
   4  21  17  606.20   74.40
   4  21  18  321.60   41.80
   4  21  19  163.80   34.40
   4  21  20  283.30   41.70
   4  21  21  183.10   35.90
   4  21  22  106.30   31.40
   4  22 -22  723.50   91.50
   4  22 -21    1.10   47.60
   4  22 -20  535.60   86.50
   4  22 -19  279.60   71.20
   4  22 -18  111.50   49.60
   4  22 -17   -1.20   36.80
   4  22 -16 1257.00  106.80
   4  22 -15  141.30   57.50
   4  22 -14  571.00   77.20
   4  22 -13  754.30   90.20
   4  22 -12  104.50   63.00
   4  22 -11 1360.70  129.30
   4  22 -10 1545.80  137.50
   4  22  -9 2774.90  196.90
   4  22  -8 5777.80  323.80
   4  22  -7 2904.80  196.00
   4  22  -613764.90  692.60
   4  22  -5  281.50   60.30
   4  22  -4 5416.50  290.40
   4  22  -3  173.80   59.40
   4  22  -2 4413.80  275.00
   4  22  -1  371.10   45.50
   4  22   0 4879.60  256.90
   4  22   1 1292.10   74.50
   4  22   2  394.60   40.90
   4  22   3   69.70   25.30
   4  22   4  259.60   36.40
   4  22   5  305.90   38.10
   4  22   6   29.50   23.60
   4  22   7   44.00   24.20
   4  22   8  188.40   35.40
   4  22   9   70.00   26.10
   4  22  10 1437.70   78.50
   4  22  11 1005.30   64.70
   4  22  12  -64.50   34.70
   4  22  13   46.90   28.70
   4  22  14  147.70   31.40
   4  22  15   46.20   29.80
   4  22  16   43.10   30.80
   4  22  17  497.50   56.10
   4  22  18    0.90   29.20
   4  22  19  266.60   39.60
   4  22  20   88.40   31.00
   4  23 -20   94.00   46.20
   4  23 -19 1024.20  126.60
   4  23 -18   14.90   43.90
   4  23 -17  490.50   79.30
   4  23 -16   91.70   52.10
   4  23 -15  329.20   45.90
   4  23 -14  585.30   79.50
   4  23 -13 2178.60  172.30
   4  23 -12  495.80   67.90
   4  23 -11  520.60   78.40
   4  23 -10   23.00   38.30
   4  23  -9  343.90   64.30
   4  23  -8  219.20   54.50
   4  23  -7   69.60   54.80
   4  23  -6 1830.00  129.90
   4  23  -5   29.00   46.10
   4  23  -4  798.00   87.30
   4  23  -3  888.70   93.20
   4  23  -2  350.70   58.10
   4  23  -1 3247.00  186.30
   4  23   0   25.60   44.90
   4  23   1  366.80   64.70
   4  23   2  952.70   87.20
   4  23   3  171.10   49.10
   4  23   4  962.60   90.60
   4  23   5  406.40   54.70
   4  23   6  155.00   42.60
   4  23   7  564.40   45.00
   4  23   8 3112.10  138.10
   4  23   9 3767.80  173.10
   4  23  10 8270.80  303.40
   4  23  11   38.70   24.80
   4  23  12 7638.30  280.30
   4  23  13 4249.60  210.50
   4  23  14 1356.20   84.50
   4  23  15   59.20   31.90
   4  23  16  224.00   38.80
   4  23  17  421.50   50.30
   4  23  18 1297.40   82.50
   4  24 -18  277.00   51.30
   4  24 -17  122.70   53.90
   4  24 -16  104.80   60.50
   4  24 -15 2977.50  224.30
   4  24 -14  -34.70   51.30
   4  24 -13  504.70   75.90
   4  24 -12  179.10   44.40
   4  24 -11  186.40   51.80
   4  24 -10  117.10   54.10
   4  24  -9 3065.50  190.00
   4  24  -8  658.90   72.70
   4  24  -7  358.10   71.80
   4  24  -6 3187.40  195.70
   4  24  -5 3701.10  231.50
   4  24  -4 2337.80  180.30
   4  24  -3 2028.50  165.50
   4  24  -2  390.80   57.20
   4  24  -1   32.20   44.60
   4  24   0  360.50   60.00
   4  24   1  531.40   57.00
   4  24   2 1247.40  110.80
   4  24   3  143.50   49.70
   4  24   4  421.10   62.80
   4  24   5 1134.60   96.70
   4  24   6   15.70   32.70
   4  24   7   27.30   32.60
   4  24   8  529.10   64.60
   4  24   9   68.00   34.80
   4  24  10  205.90   47.40
   4  24  11 1695.20  131.70
   4  24  12 2459.60  168.70
   4  24  13   72.40   42.40
   4  24  14  360.00   61.90
   4  24  15  322.50   59.40
   4  25 -16  389.30   68.50
   4  25 -15   81.00   47.30
   4  25 -14 1584.90  147.10
   4  25 -13 1637.40  167.10
   4  25 -12   23.40   51.80
   4  25 -11   50.30   52.20
   4  25 -10  119.50   57.40
   4  25  -9  425.30   66.30
   4  25  -8  101.70   54.90
   4  25  -7 2796.50  190.10
   4  25  -6 1167.90  104.80
   4  25  -5  101.30   48.60
   4  25  -4  938.40   80.00
   4  25  -3 2057.70  140.10
   4  25  -2   32.80   33.30
   4  25  -1  877.10   92.70
   4  25   0  428.00   59.20
   4  25   1   67.00   36.30
   4  25   2 1246.00  101.40
   4  25   3 1316.50  105.20
   4  25   4  342.80   51.80
   4  25   5  119.50   41.90
   4  25   6  836.20   90.50
   4  25   7  396.40   58.90
   4  25   8 1070.80   99.50
   4  25   9  117.00   38.90
   4  25  10 1177.70  116.10
   4  25  11   57.80   39.90
   4  25  12 4410.80  271.40
   4  26 -13  659.70   90.40
   4  26 -12   82.20   44.70
   4  26 -11  643.40   80.00
   4  26 -10 1249.70  128.60
   4  26  -9  864.30  101.00
   4  26  -8  543.70   84.50
   4  26  -7  797.90  125.10
   4  26  -6 2102.70  169.30
   4  26  -5  363.50   59.40
   4  26  -4  836.40   92.50
   4  26  -3  848.60   92.90
   4  26  -2 4279.20  273.50
   4  26  -1  161.50   57.70
   4  26   0 3658.30  247.70
   4  26   1 1177.20  115.90
   4  26   2  220.70   62.40
   4  26   3 2818.30  202.90
   4  26   4  533.20   70.40
   4  26   5 1775.40  163.80
   4  26   6   13.30   40.60
   4  26   7  893.80   88.10
   4  26   8   32.60   42.60
   4  27  -8   72.00   49.50
   4  27  -7  297.00   60.40
   4  27  -6 -105.60   41.80
   4  27  -5  -19.70   42.80
   4  27  -4 1016.80  116.00
   4  27  -3 1200.30  121.30
   4  27  -2 1561.10  137.20
   4  27  -1 1649.70  155.70
   4  27   0   -0.40   42.60
   4  27   1  100.90   39.60
   4  27   2  -27.60   39.20
   4  27   3  -49.60   39.30
   5   0 -36   22.50   32.80
   5   0 -35  334.80   44.10
   5   0 -34  -46.90   29.80
   5   0 -33 2194.30  122.30
   5   0 -32   27.10   36.30
   5   0 -31   86.80   29.50
   5   0 -30   -8.90   27.40
   5   0 -29 9409.70  302.00
   5   0 -28   17.50   41.40
   5   0 -27 6583.50  234.60
   5   0 -26    6.60   56.00
   5   0 -25 1499.30   77.60
   5   0 -24  -25.90   26.90
   5   0 -23  247.00   33.30
   5   0 -22  -34.80   23.90
   5   0 -21 9745.30  294.70
   5   0 -20   -7.90   25.90
   5   0 -19   31.80   24.20
   5   0 -18  -21.30   18.00
   5   0 -17 9042.10  286.40
   5   0 -16    0.30   20.30
   5   0 -15 3228.20  119.70
   5   0 -14    2.20   16.50
   5   0 -13 1046.30   53.10
   5   0 -12   18.70   11.90
   5   0 -10   12.80    9.40
   5   0  -956574.00 1809.60
   5   0  -8    6.60    7.80
   5   0  -7  375.90   15.20
   5   0  -6   29.80    8.50
   5   0  -5   52.10    7.90
   5   0  -4   30.10    7.90
   5   0  -2   12.90    7.10
   5   0   0    9.40    6.20
   5   0   110960.10  215.00
   5   0   2   14.90    7.10
   5   0   313764.60  260.00
   5   0   4   16.10    6.30
   5   0   5  151.60    9.80
   5   0   6   20.60    7.30
   5   0   7 5884.10  120.70
   5   0   8   20.10    8.20
   5   0   919352.20  534.00
   5   0  10    3.20   12.50
   5   0  11  258.80   18.10
   5   0  12   12.70   16.70
   5   0  13 1017.30   42.30
   5   0  14  -30.50   19.40
   5   0  1518690.40  522.10
   5   0  16  -65.50   23.60
   5   0  17 4452.80  134.30
   5   0  18   -4.80   21.40
   5   0  19 2203.30   87.60
   5   0  20  -14.10   18.70
   5   0  21 2326.50   99.00
   5   0  22   -5.70   27.40
   5   0  23  565.90   51.60
   5   0  24   25.00   32.40
   5   0  25 1536.30   82.30
   5   0  26   40.80   30.30
   5   0  27  626.40   56.50
   5   0  28   17.50   27.40
   5   0  29   79.20   32.70
   5   0  30   37.30   36.90
   5   0  31 2286.90  131.50
   5   0  32  -46.20   39.30
   5   0  33  621.60   51.30
   5   1 -36   28.00   21.50
   5   1 -35  139.60   26.80
   5   1 -34  -11.70   21.40
   5   1 -33   74.70   24.70
   5   1 -32 1235.10   54.90
   5   1 -31  286.70   28.20
   5   1 -30  587.30   35.40
   5   1 -29 3235.60   96.20
   5   1 -28  506.70   37.70
   5   1 -2711115.50  243.90
   5   1 -26  598.30   32.10
   5   1 -25  300.70   26.50
   5   1 -24    1.50   16.90
   5   1 -23  653.50   28.80
   5   1 -22  872.70   36.20
   5   1 -21    5.90   15.60
   5   1 -20  261.60   20.60
   5   1 -19   17.90   18.10
   5   1 -18 5380.50  120.70
   5   1 -17  718.20   28.60
   5   1 -16 4607.50  104.50
   5   1 -15 8614.60  175.70
   5   1 -14 1790.30   47.70
   5   1 -13   38.70    7.40
   5   1 -12 2043.50   43.00
   5   1 -1123546.80  352.20
   5   1 -1011491.80  154.60
   5   1  -9 6816.90   95.80
   5   1  -8  126.50    7.40
   5   1  -7   48.10    5.60
   5   1  -6 7322.50  103.80
   5   1  -5 1249.90   23.40
   5   1  -4  474.90   12.30
   5   1  -2  355.50    9.70
   5   1  -110189.30  147.00
   5   1   0   85.40    4.90
   5   1   1 8576.10  118.00
   5   1   2 3503.30   54.30
   5   1   3 1589.80   28.50
   5   1   4 6798.70   96.20
   5   1   5 1904.40   31.40
   5   1   6  368.30   10.80
   5   1   7 9043.40  132.80
   5   1   811266.30  167.30
   5   1   9 4053.80   97.00
   5   1  10 2235.30   55.00
   5   1  11 2498.80   60.20
   5   1  12 8007.70  159.70
   5   1  1314001.00  270.20
   5   1  14 7329.20  186.80
   5   1  1545740.40  839.50
   5   1  16 5983.30  133.50
   5   1  17 2453.20   66.60
   5   1  18 1068.30   35.80
   5   1  19   48.40   15.60
   5   1  20 1049.50   40.50
   5   1  21  396.90   28.80
   5   1  22 1697.60   59.40
   5   1  23 3647.30  104.10
   5   1  24 1008.60   43.30
   5   1  25   25.00   22.60
   5   1  26 2211.90   79.90
   5   1  27 1263.40   55.10
   5   1  28  141.80   27.20
   5   1  29    3.10   26.10
   5   1  30  134.10   27.70
   5   1  31 2055.20   85.50
   5   1  32  374.70   36.30
   5   1  33 6754.20  194.40
   5   2 -36  -31.90   25.20
   5   2 -35   50.10   22.20
   5   2 -34   41.90   23.40
   5   2 -33  864.50   41.90
   5   2 -32 1846.80   61.70
   5   2 -31  760.30   41.80
   5   2 -30  504.50   37.10
   5   2 -2916550.40  353.70
   5   2 -28 2820.20   89.50
   5   2 -2711415.90  250.50
   5   2 -26  564.60   30.70
   5   2 -25  512.20   31.40
   5   2 -24 1479.50   47.60
   5   2 -23  708.90   31.40
   5   2 -22 2221.50   58.40
   5   2 -21  851.30   32.30
   5   2 -20 9822.50  190.70
   5   2 -19 1202.20   34.80
   5   2 -18 2073.80   51.30
   5   2 -17 3219.90   73.70
   5   2 -16  973.90   29.30
   5   2 -15   75.60   12.40
   5   2 -14 1221.20   33.80
   5   2 -13 2540.70   50.60
   5   2 -12  390.40   14.50
   5   2 -11 2507.40   48.00
   5   2 -10  117.90    7.10
   5   2  -9 3162.80   50.30
   5   2  -8 4901.50   71.10
   5   2  -7 1367.90   23.10
   5   2  -6  111.90    6.50
   5   2  -5   28.20    5.20
   5   2  -4 2460.50   40.00
   5   2  -314062.50  213.40
   5   2  -2 7159.60  102.40
   5   2  -1 6144.40   88.40
   5   2   016546.80  214.60
   5   2   1 1489.00   26.10
   5   2   2 2259.10   38.10
   5   2   3    7.30    4.40
   5   2   4 4408.70   64.90
   5   2   5 1136.20   21.00
   5   2   6  612.50   14.00
   5   2   7  466.80   13.00
   5   2   8 2441.70   56.80
   5   2   9  323.50   17.80
   5   2  1029326.70  569.00
   5   2  11   43.10   10.40
   5   2  12 9401.90  197.10
   5   2  13 9027.90  197.80
   5   2  14 7996.70  206.60
   5   2  1556440.50 2100.20
   5   2  16 2112.50   62.50
   5   2  1717423.60  343.10
   5   2  18  771.10   30.20
   5   2  19 6715.30  155.80
   5   2  20  610.00   29.80
   5   2  21 5932.10  145.50
   5   2  22  984.60   41.00
   5   2  23  947.80   45.00
   5   2  24 1222.80   53.10
   5   2  25  767.60   40.10
   5   2  26 4451.50  122.00
   5   2  27  326.30   29.80
   5   2  28  157.70   25.10
   5   2  29   17.70   23.00
   5   2  30  781.00   50.20
   5   2  31  312.90   31.80
   5   2  32  985.70   54.40
   5   2  33  229.90   30.40
   5   3 -36  347.50   36.70
   5   3 -35  978.10   49.70
   5   3 -34   94.80   26.50
   5   3 -33 2153.20   74.10
   5   3 -32  156.80   26.40
   5   3 -31  304.20   32.60
   5   3 -30 1447.60   58.20
   5   3 -29  214.60   28.40
   5   3 -28  369.80   30.90
   5   3 -27  294.90   27.20
   5   3 -26  573.00   29.10
   5   3 -25  194.80   26.10
   5   3 -24  409.70   26.70
   5   3 -23 2501.40   65.20
   5   3 -22 1534.30   46.30
   5   3 -21   43.40   16.50
   5   3 -20 1851.00   48.00
   5   3 -19   -6.60   13.00
   5   3 -18 1734.30   46.30
   5   3 -17 9673.30  188.20
   5   3 -16  245.50   15.90
   5   3 -15 7140.20  138.80
   5   3 -14 2267.80   44.70
   5   3 -13  371.30   13.80
   5   3 -12 4495.30   82.60
   5   3 -11 2963.80   61.10
   5   3 -10   39.90    5.90
   5   3  -9 2682.90   41.90
   5   3  -813470.20  168.80
   5   3  -7  246.70    8.00
   5   3  -626363.30  410.00
   5   3  -5   74.20    5.50
   5   3  -4 6796.90   95.10
   5   3  -3 2285.70   36.30
   5   3  -2 4500.00   66.70
   5   3  -120333.10  306.70
   5   3   0  863.60   16.60
   5   3   1 1477.00   26.10
   5   3   2 9129.50  126.80
   5   3   340838.10 1497.70
   5   3   4 7933.90  110.10
   5   3   513304.50  175.60
   5   3   6 1214.60   24.30
   5   3   7   78.10    6.60
   5   3   8 1613.60   36.80
   5   3   9 1483.90   46.10
   5   3  10  447.80   21.00
   5   3  11  423.60   22.30
   5   3  12 1697.10   51.50
   5   3  13 1097.30   38.80
   5   3  14 1095.00   44.20
   5   3  15    8.80   14.80
   5   3  16 1491.80   49.30
   5   3  17  507.90   27.10
   5   3  18   73.70   17.20
   5   3  19 7148.70  155.90
   5   3  20  414.00   29.90
   5   3  21 7312.30  175.50
   5   3  22   22.50   20.20
   5   3  23   -6.30   19.00
   5   3  24 8652.90  208.20
   5   3  25 2611.10   85.70
   5   3  26 6018.60  158.60
   5   3  27  133.70   23.50
   5   3  28  996.50   52.50
   5   3  29  521.00   35.90
   5   3  30   56.30   21.60
   5   3  31 4526.10  145.50
   5   3  32 1087.80   58.80
   5   3  33 7035.80  209.70
   5   4 -36  489.60   40.70
   5   4 -35  963.00   52.80
   5   4 -34 3725.10  105.80
   5   4 -33 2256.20   76.60
   5   4 -32  404.20   32.20
   5   4 -31  749.60   40.10
   5   4 -30 2082.50   68.60
   5   4 -29  276.70   27.00
   5   4 -28 1696.50   58.30
   5   4 -27 2832.10   75.80
   5   4 -26 2080.60   62.70
   5   4 -25   -9.20   16.90
   5   4 -24 3051.70   78.40
   5   4 -23   42.40   19.20
   5   4 -22 2030.70   54.40
   5   4 -21 2340.80   61.00
   5   4 -2011711.60  217.30
   5   4 -19 1619.10   39.60
   5   4 -18 1747.60   47.90
   5   4 -17 6207.60  128.90
   5   4 -16 6661.00  142.30
   5   4 -15  861.60   29.80
   5   4 -1410044.00  166.70
   5   4 -13 3410.00   65.10
   5   4 -12 9709.80  164.70
   5   4 -11  217.90   11.10
   5   4 -10  263.50   11.20
   5   4  -9  322.60   10.10
   5   4  -821710.70  270.10
   5   4  -7 1704.60   28.90
   5   4  -6  130.20    6.30
   5   4  -5 3742.80   54.60
   5   4  -4   78.00    7.90
   5   4  -3 4983.50   88.50
   5   4  -2 3323.30   48.80
   5   4  -1 2744.50   41.60
   5   4   012181.90  171.60
   5   4   129868.80  605.20
   5   4   2 6384.20   91.00
   5   4   312411.60  174.40
   5   4   4 2273.70   37.80
   5   4   5  155.40    6.90
   5   4   615578.00  201.60
   5   4   7  129.70    8.00
   5   4   816804.50  268.50
   5   4   9 3570.90   76.40
   5   4  1020254.50  382.20
   5   4  11 7624.90  158.90
   5   4  1212019.70  235.90
   5   4  13 3278.40   80.20
   5   4  14 1019.00   39.90
   5   4  1512452.60  262.00
   5   4  16  739.30   28.60
   5   4  17   96.80   15.10
   5   4  18 3115.50   72.50
   5   4  1928464.10  523.10
   5   4  2020236.10  394.80
   5   4  2134179.30  652.60
   5   4  22 5116.90  134.30
   5   4  23 1555.50   56.20
   5   4  24   54.50   19.70
   5   4  25  473.10   31.10
   5   4  26   -1.10   16.90
   5   4  27  134.00   25.30
   5   4  28  162.20   26.70
   5   4  29   14.70   22.90
   5   4  30    3.70   24.30
   5   4  31   28.80   25.20
   5   4  32  773.60   47.80
   5   4  33  346.10   32.90
   5   5 -36  266.90   43.40
   5   5 -35  123.00   30.00
   5   5 -34   22.20   23.40
   5   5 -33  474.00   36.40
   5   5 -32   16.90   25.50
   5   5 -31   57.80   25.20
   5   5 -30 1146.20   49.00
   5   5 -29  516.70   31.50
   5   5 -28  173.10   24.00
   5   5 -27  327.00   27.00
   5   5 -26 1264.90   46.10
   5   5 -25  203.80   20.70
   5   5 -24  203.10   21.40
   5   5 -23 2956.70   78.40
   5   5 -22  722.00   31.10
   5   5 -21  219.60   19.10
   5   5 -20   37.80   15.60
   5   5 -19 1272.70   38.20
   5   5 -1810813.10  208.60
   5   5 -1746176.70 1611.10
   5   5 -14  779.80   23.20
   5   5 -1320334.70  324.50
   5   5 -1215555.50  258.10
   5   5 -11 2079.40   41.00
   5   5 -1011840.50  184.50
   5   5  -918856.80  257.40
   5   5  -8 9340.70  127.70
   5   5  -715387.80  210.80
   5   5  -6 3468.00   53.10
   5   5  -5  209.90    7.50
   5   5  -4  302.70   11.80
   5   5  -3 1810.60   36.20
   5   5  -2 9466.50  148.60
   5   5  -1  305.70    7.50
   5   5   0 1446.60   23.30
   5   5   139507.60  927.40
   5   5   228202.90  489.50
   5   5   431937.60  491.30
   5   5   5  882.40   20.00
   5   5   6 7369.80  113.20
   5   5   7 8142.20  137.40
   5   5   8 3899.70   75.50
   5   5   9 4615.60   91.90
   5   5  10 1978.80   49.10
   5   5  11 5835.00  122.80
   5   5  12 1433.10   40.30
   5   5  13 6941.00  142.00
   5   5  14  291.90   20.00
   5   5  15  505.60   24.70
   5   5  16 3924.00   91.40
   5   5  17 2864.70   66.10
   5   5  18 1257.90   40.70
   5   5  1910236.30  206.60
   5   5  20  791.70   36.50
   5   5  21 1564.50   52.00
   5   5  22 2369.80   76.90
   5   5  23  249.00   25.10
   5   5  24 2934.50   93.10
   5   5  25   28.70   19.90
   5   5  26 1607.30   62.00
   5   5  27 1031.40   48.80
   5   5  28  256.90   30.20
   5   5  29 1679.60   69.80
   5   5  30   15.80   22.60
   5   5  31  162.60   26.10
   5   5  32   44.40   23.50
   5   5  33   43.00   23.80
   5   6 -35  225.10   29.50
   5   6 -34  342.80   35.60
   5   6 -33 2297.50   79.50
   5   6 -32  130.60   26.10
   5   6 -31 5131.90  137.60
   5   6 -30   46.10   24.00
   5   6 -29 1497.70   57.50
   5   6 -28  269.30   22.40
   5   6 -27 1568.30   53.30
   5   6 -26  287.50   25.70
   5   6 -25  304.10   23.10
   5   6 -24  113.10   18.70
   5   6 -23  201.70   20.50
   5   6 -22   70.80   19.60
   5   6 -21 2452.30   66.00
   5   6 -20  572.40   28.00
   5   6 -19  483.20   25.40
   5   6 -18  131.60   18.00
   5   6 -1712400.80  245.50
   5   6 -16 1776.70   64.30
   5   6 -1557512.20 1389.70
   5   6 -14  709.70   23.90
   5   6 -13 3240.70   63.70
   5   6 -12 1476.70   33.70
   5   6 -1115052.60  223.20
   5   6 -10   16.40    6.40
   5   6  -915279.10  207.80
   5   6  -8   30.80    5.50
   5   6  -712038.20  169.50
   5   6  -6  590.50   13.10
   5   6  -5 4277.20   64.70
   5   6  -4   42.20    7.00
   5   6  -310502.40  161.30
   5   6  -2  174.70    5.10
   5   6  -1  206.40    6.60
   5   6   013478.60  184.90
   5   6   2  241.40    8.80
   5   6   4 2014.00   36.20
   5   6   5 2740.60   49.20
   5   6   6 1408.80   28.70
   5   6   7  344.90   12.60
   5   6   8 1107.20   26.90
   5   6   9 4158.30   85.10
   5   6  10  852.60   27.40
   5   6  11 7250.00  144.00
   5   6  12 1326.80   36.20
   5   6  13  699.40   26.50
   5   6  14  425.30   21.80
   5   6  15  594.40   25.20
   5   6  16 4441.60  100.20
   5   6  1711109.30  219.90
   5   6  18 2030.40   59.10
   5   6  1915225.50  287.00
   5   6  20  663.30   31.50
   5   6  2110575.90  224.00
   5   6  22 4520.60  116.60
   5   6  23  728.30   37.90
   5   6  24  167.10   22.40
   5   6  25  791.80   38.40
   5   6  26  631.20   38.40
   5   6  27  673.50   37.00
   5   6  28  253.30   28.90
   5   6  29  433.20   35.60
   5   6  30   65.20   25.60
   5   6  31  652.00   42.10
   5   6  32  -28.80   21.00
   5   6  33  328.00   35.60
   5   7 -35  -10.80   22.70
   5   7 -34  786.30   46.00
   5   7 -33  450.00   33.60
   5   7 -32  213.10   28.30
   5   7 -31  282.90   28.40
   5   7 -30 1351.60   53.20
   5   7 -29  252.40   26.30
   5   7 -28  939.60   41.30
   5   7 -27 1957.80   61.00
   5   7 -26  136.40   23.10
   5   7 -25  119.30   19.90
   5   7 -24  952.90   39.40
   5   7 -23 2698.40   77.30
   5   7 -22 6783.90  154.30
   5   7 -21  257.90   22.10
   5   7 -20 2411.60   65.60
   5   7 -19    7.10   13.90
   5   7 -18 1502.70   46.40
   5   7 -1717121.20  364.20
   5   7 -16  102.10   15.40
   5   7 -1543137.40  756.50
   5   7 -14 5214.50   95.70
   5   7 -13 8425.00  142.20
   5   7 -12 1559.70   33.80
   5   7 -11  597.30   16.40
   5   7 -10  140.80    8.00
   5   7  -9 6064.70   89.50
   5   7  -8 7746.00  110.70
   5   7  -7  480.60   12.00
   5   7  -6 8736.20  124.30
   5   7  -5   29.30    3.70
   5   7  -4 9118.40  125.00
   5   7  -3  255.10    6.60
   5   7  -2 3481.50   50.60
   5   7  -1 1640.80   28.30
   5   7   0 4653.60   64.30
   5   7   122429.40  279.50
   5   7   227289.40  480.80
   5   7   4 1638.90   30.50
   5   7   5  773.30   17.80
   5   7   6 4569.70   74.50
   5   7   7 3013.20   55.40
   5   7   8  398.50   14.60
   5   7   9  374.40   15.00
   5   7  10   58.40   11.60
   5   7  11  771.90   27.20
   5   7  12 4390.00   96.20
   5   7  1312657.70  255.20
   5   7  14  866.60   33.20
   5   7  15 7275.70  160.00
   5   7  16 2107.90   56.80
   5   7  17   81.40   17.00
   5   7  18   77.60   18.90
   5   7  19 7334.80  162.30
   5   7  20 1614.20   53.40
   5   7  21 3185.10   86.20
   5   7  22 5866.20  140.30
   5   7  23  421.80   27.30
   5   7  24 7524.80  177.50
   5   7  25  -17.00   18.80
   5   7  26  100.70   22.80
   5   7  27  945.20   44.10
   5   7  28   56.50   25.10
   5   7  29  785.90   44.00
   5   7  30 1378.90   60.50
   5   7  31  321.20   29.60
   5   7  32   68.90   22.10
   5   7  33  103.70   36.10
   5   8 -35  472.40   37.20
   5   8 -34    3.90   23.60
   5   8 -33 1798.50   65.30
   5   8 -32  -48.30   18.90
   5   8 -31   33.70   18.30
   5   8 -30  238.10   28.40
   5   8 -29 3877.70  105.20
   5   8 -28  372.50   29.60
   5   8 -27 3493.50   98.00
   5   8 -26 2379.40   70.90
   5   8 -25  356.30   24.90
   5   8 -24  167.00   22.70
   5   8 -23 1504.00   49.90
   5   8 -22   26.80   18.30
   5   8 -21  399.90   25.70
   5   8 -20 7585.00  179.50
   5   8 -19   22.60   15.90
   5   8 -18 4061.00   88.50
   5   8 -17  133.50   17.70
   5   8 -16 2395.50   61.10
   5   8 -15 2699.10   66.10
   5   8 -14   30.80    9.20
   5   8 -13 2039.50   42.60
   5   8 -12  182.50   11.00
   5   8 -11 4992.80   82.10
   5   8 -10   42.60    7.10
   5   8  -910240.20  157.50
   5   8  -8 2261.10   39.20
   5   8  -7 1959.20   34.70
   5   8  -6  351.30   10.00
   5   8  -5 5848.00   86.40
   5   8  -4  171.20    6.10
   5   8  -3 2928.30   47.20
   5   8  -2  399.90    9.70
   5   8  -1   12.20    4.20
   5   8   0 8388.10  122.90
   5   8   1  349.80    9.60
   5   8   2   75.20    6.50
   5   8   3  616.80   14.90
   5   8   4  501.80   12.20
   5   8   5 2855.50   47.60
   5   8   623703.80  340.20
   5   8   7 3969.40   71.60
   5   8   8  103.90   10.50
   5   8   9 1111.90   28.40
   5   8  10 1771.70   46.40
   5   8  11 1846.10   49.40
   5   8  1215589.90  305.10
   5   8  13  906.90   35.10
   5   8  14 4197.80  102.10
   5   8  15 4267.00  100.40
   5   8  16  108.10   15.70
   5   8  17  450.40   21.70
   5   8  18 7604.10  171.30
   5   8  19 9090.20  201.80
   5   8  20 4607.70  119.10
   5   8  2112765.00  277.40
   5   8  22 1603.40   57.90
   5   8  23 2560.70   79.80
   5   8  24   54.80   21.60
   5   8  25  660.50   39.40
   5   8  26 3018.10   95.50
   5   8  27  314.40   29.50
   5   8  28 1754.10   68.00
   5   8  29  340.50   31.40
   5   8  30  801.60   43.10
   5   8  31  907.50   51.60
   5   8  32    5.20   22.10
   5   9 -34  540.20   42.20
   5   9 -33  278.90   33.80
   5   9 -32  465.80   39.60
   5   9 -31  670.80   37.40
   5   9 -30   -0.80   20.60
   5   9 -29   61.10   22.90
   5   9 -28   74.80   22.50
   5   9 -27 2063.10   65.80
   5   9 -26  -38.80   19.00
   5   9 -25 1540.80   61.30
   5   9 -24  358.90   29.30
   5   9 -23 2073.90   64.20
   5   9 -22 1175.20   40.80
   5   9 -21   61.50   15.80
   5   9 -20  251.90   19.80
   5   9 -19 2752.60   68.80
   5   9 -18 7435.50  157.00
   5   9 -17 1365.80   40.80
   5   9 -16 2437.90   60.90
   5   9 -15  936.90   33.40
   5   9 -14  465.70   18.40
   5   9 -13  345.90   15.50
   5   9 -12   18.40    7.70
   5   9 -11 3207.10   57.60
   5   9 -10   13.80    6.60
   5   9  -9 9024.80  139.80
   5   9  -8 4631.70   72.10
   5   9  -7 5094.60   77.60
   5   9  -611011.40  154.90
   5   9  -5 4736.90   70.10
   5   9  -4 4044.50   67.20
   5   9  -3 1348.40   23.40
   5   9  -2 2597.80   41.00
   5   9  -1  511.20   11.50
   5   9   0   71.10    5.40
   5   9   1 1563.90   32.00
   5   9   2   85.40    5.80
   5   9   3 3946.50   62.30
   5   9   419002.80  257.00
   5   9   5  851.40   18.70
   5   9   6 4335.40   76.60
   5   9   7 1294.00   32.50
   5   9   8 5484.40  119.40
   5   9   9 1882.90   42.10
   5   9  10 1371.80   40.10
   5   9  11 2250.50   55.60
   5   9  12  144.30   14.40
   5   9  13 9953.80  210.10
   5   9  14 1046.60   37.20
   5   9  15 5720.40  142.30
   5   9  16  206.60   18.30
   5   9  17  289.70   20.50
   5   9  18  784.10   33.90
   5   9  19  759.70   33.70
   5   9  20  756.00   37.70
   5   9  21   66.20   21.10
   5   9  22 1081.20   41.90
   5   9  23 5266.60  143.50
   5   9  24  597.90   35.50
   5   9  25 1611.80   57.80
   5   9  26  715.80   40.60
   5   9  27 1021.20   48.60
   5   9  28  -11.70   22.60
   5   9  29 1405.50   58.60
   5   9  30 1731.80   74.10
   5   9  31  909.90   50.30
   5   9  32   23.50   26.30
   5  10 -34  755.90   40.70
   5  10 -33 1123.40   50.60
   5  10 -32   27.40   20.60
   5  10 -31  291.80   29.70
   5  10 -30 1725.80   61.10
   5  10 -29 8126.90  194.60
   5  10 -28  565.30   34.60
   5  10 -27 1311.80   52.40
   5  10 -26 1663.40   56.40
   5  10 -25  -54.90   20.30
   5  10 -24 2347.90   71.80
   5  10 -23  504.60   29.70
   5  10 -22   68.30   17.30
   5  10 -21  143.90   18.50
   5  10 -20    6.10   16.30
   5  10 -19 1670.30   47.30
   5  10 -18   27.20   14.70
   5  10 -17 1155.60   34.00
   5  10 -16  500.70   24.80
   5  10 -15  222.40   17.80
   5  10 -1414233.30  247.30
   5  10 -13  605.80   18.70
   5  10 -12 1845.10   40.90
   5  10 -1112500.60  187.80
   5  10 -10 5674.00   90.60
   5  10  -937634.40  567.60
   5  10  -815245.20  220.90
   5  10  -715506.50  210.00
   5  10  -6  539.10   12.60
   5  10  -513000.80  175.00
   5  10  -411482.40  166.90
   5  10  -310533.10  140.20
   5  10  -2  664.20   13.00
   5  10  -1  847.40   15.80
   5  10   013949.30  189.20
   5  10   1   65.40    5.00
   5  10   2 7234.70  104.10
   5  10   3  844.40   17.90
   5  10   4   11.70    5.00
   5  10   511349.30  170.70
   5  10   6   32.50    7.00
   5  10   716782.50  273.60
   5  10   8  694.80   19.70
   5  10   911643.70  200.80
   5  10  10  285.80   14.00
   5  10  11   69.70   13.30
   5  10  12 6036.10  138.10
   5  10  13 3409.50   86.40
   5  10  14  470.20   24.40
   5  10  15 3828.70   99.20
   5  10  16 2499.10   67.70
   5  10  17 4958.10  112.70
   5  10  18  710.10   30.80
   5  10  19  380.00   23.70
   5  10  20 1046.60   43.90
   5  10  21  333.90   30.20
   5  10  22  776.90   40.30
   5  10  23  119.70   20.70
   5  10  24 2572.30   81.00
   5  10  25  198.90   26.10
   5  10  26 3322.30   99.30
   5  10  27 1088.80   51.40
   5  10  28   37.70   23.10
   5  10  29 1151.10   48.70
   5  10  30   -8.50   22.40
   5  10  31 1003.60   49.90
   5  11 -33  150.60   30.50
   5  11 -32   11.10   23.60
   5  11 -31  856.20   43.70
   5  11 -30  450.10   30.40
   5  11 -29 1078.60   49.90
   5  11 -28  -11.80   23.80
   5  11 -27 8095.50  191.20
   5  11 -26 2974.60   84.70
   5  11 -25 2346.90   71.50
   5  11 -24  943.20   40.60
   5  11 -23 3680.90   98.70
   5  11 -22 3434.90   92.80
   5  11 -21 2653.10   72.50
   5  11 -20 6647.60  154.40
   5  11 -19   36.90   16.20
   5  11 -18  203.00   17.50
   5  11 -17  177.60   18.00
   5  11 -16  493.70   23.40
   5  11 -15 9781.50  199.40
   5  11 -14 1535.30   39.20
   5  11 -13  695.30   21.70
   5  11 -12 3725.20   71.80
   5  11 -11 2661.80   48.20
   5  11 -10  164.90    9.80
   5  11  -9   46.30    6.90
   5  11  -8 1537.00   30.80
   5  11  -7   44.50    6.00
   5  11  -6 1426.30   26.30
   5  11  -5 7862.20  108.40
   5  11  -4  196.30    7.50
   5  11  -3  124.80    5.40
   5  11  -2 3276.70   61.70
   5  11  -1 1456.00   31.70
   5  11   0 1007.40   25.30
   5  11   1 8310.00  115.00
   5  11   2 3671.20   55.70
   5  11   3  143.80    6.50
   5  11   4 8396.30  123.70
   5  11   5 2445.20   45.60
   5  11   6 6711.90  126.30
   5  11   721643.80  392.30
   5  11   835092.60  612.70
   5  11   923128.80  379.90
   5  11  10 5820.50  110.50
   5  11  11 2301.90   62.80
   5  11  1211866.90  234.10
   5  11  1316675.60  329.20
   5  11  1410056.60  208.60
   5  11  1514699.10  304.50
   5  11  16    7.90   14.90
   5  11  17  999.50   37.30
   5  11  18  810.60   34.10
   5  11  19 2368.90   70.70
   5  11  20  154.20   19.70
   5  11  21 2130.60   70.00
   5  11  22  231.90   25.30
   5  11  23 2544.30   84.80
   5  11  24    1.70   21.20
   5  11  25   16.10   20.30
   5  11  26  -22.90   21.00
   5  11  27  310.50   26.90
   5  11  28  608.10   39.60
   5  11  29   -0.90   21.00
   5  11  30 1045.10   57.20
   5  11  31   21.60   20.40
   5  12 -33    6.40   28.70
   5  12 -32  996.40   53.90
   5  12 -31   28.80   26.60
   5  12 -30 2487.70   81.80
   5  12 -29 1017.60   52.10
   5  12 -28  249.00   28.40
   5  12 -27 1007.00   44.60
   5  12 -26 2699.50   78.50
   5  12 -25 1353.00   51.20
   5  12 -24 2003.80   61.10
   5  12 -23  492.00   29.50
   5  12 -22 1131.50   45.70
   5  12 -21 1216.20   44.90
   5  12 -20  694.70   30.60
   5  12 -19  211.30   19.40
   5  12 -18 1170.70   39.50
   5  12 -17  398.50   21.00
   5  12 -16  808.90   29.70
   5  12 -15 3855.10   87.80
   5  12 -14  776.30   24.20
   5  12 -13   65.90    9.90
   5  12 -12  174.30   11.50
   5  12 -1117239.80  254.20
   5  12 -1017435.60  280.70
   5  12  -928016.40  435.90
   5  12  -836368.80  626.50
   5  12  -7 7261.60  110.00
   5  12  -6 5790.10   86.30
   5  12  -517197.40  231.10
   5  12  -445162.30  894.90
   5  12  -329262.10  460.10
   5  12  -215459.20  253.20
   5  12  -1  546.70   18.00
   5  12   0 4642.20   88.30
   5  12   110651.90  181.90
   5  12   2   39.50    8.60
   5  12   325516.30  334.10
   5  12   4 1933.80   36.90
   5  12   5 1461.20   34.70
   5  12   6  233.60   10.40
   5  12   7 6281.70  130.50
   5  12   8 2262.80   51.40
   5  12   9  928.10   27.80
   5  12  10   25.10   10.00
   5  12  11 1464.90   42.50
   5  12  12   38.30   12.00
   5  12  13 1771.10   53.00
   5  12  14 4059.90  101.30
   5  12  15 3412.20   87.20
   5  12  16 3426.30   89.80
   5  12  17  130.90   20.40
   5  12  18 8540.50  193.10
   5  12  19  798.90   37.70
   5  12  20  413.90   27.90
   5  12  21  363.50   29.00
   5  12  22  564.30   34.80
   5  12  23  240.70   27.70
   5  12  24  872.30   41.20
   5  12  25  305.90   28.10
   5  12  26   17.20   19.80
   5  12  27  146.60   22.50
   5  12  28  682.80   41.00
   5  12  29   61.20   25.30
   5  12  30 1679.00   75.70
   5  13 -32 1237.70   80.30
   5  13 -31  -61.50   26.50
   5  13 -30  525.70   44.30
   5  13 -29  373.80   36.50
   5  13 -28 1620.80   64.30
   5  13 -27  680.20   39.70
   5  13 -26 4679.50  124.30
   5  13 -25   92.70   19.90
   5  13 -24   47.80   18.70
   5  13 -23  750.00   36.50
   5  13 -22  201.60   23.70
   5  13 -21   60.10   18.70
   5  13 -20  409.80   24.60
   5  13 -19  214.00   18.40
   5  13 -18 2926.70   74.90
   5  13 -17  395.40   21.60
   5  13 -16 1446.30   46.10
   5  13 -15 4156.50   93.30
   5  13 -14 7442.30  159.80
   5  13 -13   32.40   10.30
   5  13 -12 1360.60   33.70
   5  13 -11 7192.40  114.30
   5  13 -10 7728.70  119.40
   5  13  -910262.00  153.60
   5  13  -8    9.10    6.60
   5  13  -7 2472.70   45.40
   5  13  -6 3920.00   68.90
   5  13  -5 3722.00   57.30
   5  13  -4 2235.10   49.30
   5  13  -316604.80  276.20
   5  13  -2  253.50   12.50
   5  13  -1 8164.80  142.80
   5  13   010495.50  181.00
   5  13   1  417.00   15.20
   5  13   2 5363.30  101.70
   5  13   310528.90  186.00
   5  13   4  173.90    8.70
   5  13   5 1840.50   41.80
   5  13   6  591.50   18.00
   5  13   7  683.80   20.00
   5  13   8  253.40   12.60
   5  13   9  379.50   16.50
   5  13  10   84.70   11.40
   5  13  11 1710.60   48.30
   5  13  1214600.90  283.00
   5  13  13 8285.60  180.10
   5  13  1425549.00  495.50
   5  13  15 7283.70  166.70
   5  13  16 4641.80  113.00
   5  13  17   10.30   17.00
   5  13  18 2530.70   77.40
   5  13  19   85.70   18.90
   5  13  20  454.50   26.70
   5  13  21  773.10   37.50
   5  13  22 4769.20  130.90
   5  13  23 1835.60   68.20
   5  13  24  255.10   26.40
   5  13  25   74.30   20.20
   5  13  26 1491.70   59.30
   5  13  27  508.40   34.10
   5  13  28  -11.50   26.40
   5  13  29 1249.30   54.50
   5  13  30  966.60   54.90
   5  14 -31  808.30   50.30
   5  14 -30 1203.60   68.00
   5  14 -29 1473.90   67.30
   5  14 -28  585.20   41.00
   5  14 -27 2585.30  105.60
   5  14 -26  244.90   27.10
   5  14 -25  706.60   34.90
   5  14 -24 1372.60   52.00
   5  14 -23   80.00   19.80
   5  14 -22 1138.00   45.20
   5  14 -21   37.90   17.20
   5  14 -20  664.80   33.60
   5  14 -19 5427.30  124.90
   5  14 -18   66.40   16.80
   5  14 -17 7525.70  163.00
   5  14 -16  623.40   28.60
   5  14 -15  396.10   22.40
   5  14 -14 1612.50   49.40
   5  14 -13 1887.70   52.90
   5  14 -12   65.40   12.60
   5  14 -11 2939.80   55.80
   5  14 -10  337.20   12.20
   5  14  -9 1124.90   27.60
   5  14  -8 7213.30  112.60
   5  14  -7  914.70   20.20
   5  14  -6  383.50   10.00
   5  14  -5 2522.50   54.60
   5  14  -4 1457.00   34.60
   5  14  -3   32.40    7.20
   5  14  -2  147.90    9.90
   5  14  -1 1705.10   39.70
   5  14   0  162.30   10.10
   5  14   1 4309.80   86.40
   5  14   2 3458.40   73.70
   5  14   3  208.00   16.20
   5  14   4  115.60   15.40
   5  14   5 8999.10  152.40
   5  14   6 1935.60   43.10
   5  14   7 2531.40   51.80
   5  14   8 3222.70   67.40
   5  14   9  365.30   15.70
   5  14  10 7180.10  161.60
   5  14  11 1303.40   41.70
   5  14  12  588.80   30.50
   5  14  1312840.30  268.50
   5  14  14 5918.80  150.10
   5  14  1512541.90  266.80
   5  14  16  513.00   27.90
   5  14  17 1993.10   60.90
   5  14  18 6752.00  160.00
   5  14  19 1050.30   40.90
   5  14  20   18.80   18.70
   5  14  21 6291.10  160.90
   5  14  22 1873.70   67.70
   5  14  23 1889.80   69.40
   5  14  24  399.60   30.30
   5  14  25  642.90   32.70
   5  14  26    6.20   19.10
   5  14  27 1249.20   58.60
   5  14  28   43.40   23.30
   5  14  29   47.40   25.90
   5  15 -31  132.90   28.80
   5  15 -30   56.10   23.70
   5  15 -29  817.60   52.60
   5  15 -28   54.10   28.40
   5  15 -27  819.40   47.40
   5  15 -26 1130.30   58.20
   5  15 -25  137.40   28.00
   5  15 -24   99.40   24.70
   5  15 -23  173.10   23.00
   5  15 -22  259.30   25.20
   5  15 -21 1046.10   43.70
   5  15 -20   29.80   17.80
   5  15 -19 2396.80   72.10
   5  15 -18 2272.90   64.10
   5  15 -1710461.80  216.70
   5  15 -16 2088.40   57.40
   5  15 -15  710.60   29.80
   5  15 -14 2928.70   75.70
   5  15 -13  951.50   34.00
   5  15 -1213588.60  264.10
   5  15 -11   47.60   12.50
   5  15 -10 3230.50   63.60
   5  15  -9  483.50   16.20
   5  15  -8 5941.40   92.70
   5  15  -7 2103.80   37.20
   5  15  -6 2196.70   46.60
   5  15  -5  226.60   14.70
   5  15  -4  148.40   10.60
   5  15  -3    9.50    8.10
   5  15  -2  238.90   13.00
   5  15  -1 6881.90  130.90
   5  15   0 2737.20   58.70
   5  15   1 2470.60   59.90
   5  15   2  296.80   16.70
   5  15   315799.90  344.30
   5  15   4 9851.50  221.60
   5  15   519107.00  489.60
   5  15   610110.10  165.30
   5  15   7 5475.00  117.00
   5  15   8  185.30   13.80
   5  15   9   97.90   14.20
   5  15  10 1558.40   47.70
   5  15  11 4832.30  117.10
   5  15  12  332.60   20.00
   5  15  13   64.80   15.90
   5  15  14    0.70   15.30
   5  15  15 2086.90   65.90
   5  15  16  260.20   24.10
   5  15  17   28.70   15.50
   5  15  18  959.10   36.90
   5  15  19  862.30   37.50
   5  15  20  155.70   23.00
   5  15  21 4243.70  124.30
   5  15  22  732.50   41.70
   5  15  23 2647.60   97.60
   5  15  24  437.20   37.10
   5  15  25  100.70   26.10
   5  15  26 2582.70  110.10
   5  15  27  -13.20   25.20
   5  15  28  443.00   36.60
   5  16 -29  -49.40   25.10
   5  16 -28 1174.60   66.90
   5  16 -27  250.00   33.20
   5  16 -26   86.70   25.20
   5  16 -25  -19.40   20.90
   5  16 -24  174.30   29.50
   5  16 -23  324.30   31.10
   5  16 -22  476.20   37.70
   5  16 -21 1324.20   60.20
   5  16 -20   30.50   17.60
   5  16 -19  540.80   29.80
   5  16 -18  105.60   18.80
   5  16 -17 2508.80   68.60
   5  16 -16  100.40   17.20
   5  16 -15   78.00   15.10
   5  16 -14 1837.50   53.70
   5  16 -13  311.70   20.10
   5  16 -12 2261.40   62.30
   5  16 -11 1850.90   49.80
   5  16 -10  845.90   29.20
   5  16  -9   17.70    9.50
   5  16  -8 2352.00   54.60
   5  16  -7 6481.70  159.40
   5  16  -6  644.30   25.80
   5  16  -5  495.70   17.80
   5  16  -4 1138.10   30.10
   5  16  -3 3236.60   71.00
   5  16  -2 3644.60   77.40
   5  16  -1 4703.30   95.10
   5  16   016914.10  326.20
   5  16   113235.30  263.70
   5  16   2  660.00   29.10
   5  16   3 1353.50   44.90
   5  16   4 2777.10   77.80
   5  16   5 1661.30   50.90
   5  16   6 5737.20  141.20
   5  16   7  217.60   18.80
   5  16   8 2143.90   67.00
   5  16   9  190.30   21.20
   5  16  10  278.30   21.30
   5  16  11 1206.90   52.00
   5  16  12  786.70   38.80
   5  16  13   31.20   18.00
   5  16  14  101.70   22.40
   5  16  15   91.00   19.80
   5  16  16 5051.50  150.40
   5  16  17  228.10   28.80
   5  16  18 1200.20   53.70
   5  16  19 1206.40   57.70
   5  16  20 6596.80  233.90
   5  16  2110390.20  345.20
   5  16  22 6735.40  214.10
   5  16  23 3716.80  126.50
   5  16  24    6.10   23.20
   5  16  25  222.70   30.40
   5  16  26 1251.10   74.50
   5  16  27   80.40   22.90
   5  17 -28   82.10   53.90
   5  17 -27  173.90   58.20
   5  17 -26  961.00  104.30
   5  17 -25  794.90   60.30
   5  17 -24  145.20   33.90
   5  17 -23   89.40   34.80
   5  17 -22 5117.40  172.10
   5  17 -21 1076.80   59.80
   5  17 -20 1111.30   59.00
   5  17 -19 3612.90  129.60
   5  17 -18 9903.50  266.00
   5  17 -1714921.70  363.60
   5  17 -16 9456.50  199.60
   5  17 -15 6047.70  139.60
   5  17 -14   55.20   14.60
   5  17 -13  475.90   24.30
   5  17 -12 3016.40   76.50
   5  17 -11 1336.10   41.60
   5  17 -10 1650.60   56.40
   5  17  -9  193.90   18.10
   5  17  -8  373.30   22.10
   5  17  -7  720.10   29.80
   5  17  -6 3116.20   86.40
   5  17  -5  749.20   33.00
   5  17  -4  223.40   17.90
   5  17  -3 5437.60  136.40
   5  17  -2   26.90   13.20
   5  17  -1 3583.00   93.60
   5  17   0 3787.40  101.70
   5  17   1 1910.50   60.40
   5  17   2  897.10   33.70
   5  17   3 6969.30  164.30
   5  17   420372.10  431.70
   5  17   5 2693.60   76.00
   5  17   6 4536.50  116.70
   5  17   7  456.80   28.30
   5  17   8 4176.00  117.40
   5  17   9 1172.10   43.60
   5  17  10  162.50   22.40
   5  17  11 1216.80   49.20
   5  17  12 1123.20   45.90
   5  17  13  684.20   36.70
   5  17  14   -6.40   18.50
   5  17  15   63.00   22.30
   5  17  16  558.70   36.90
   5  17  17   -5.10   18.60
   5  17  18  168.90   26.00
   5  17  19 2292.50   88.20
   5  17  20  398.70   33.70
   5  17  21  484.00   38.10
   5  17  22   82.40   23.70
   5  17  23 1020.20   57.40
   5  17  24  860.90   57.50
   5  17  25  447.30   35.70
   5  17  26   10.50   24.30
   5  18 -27  480.10   85.70
   5  18 -26  619.30   95.90
   5  18 -25  774.40   90.60
   5  18 -24  456.70   71.60
   5  18 -23  -49.80   35.70
   5  18 -22   64.40   48.20
   5  18 -21  578.40   84.80
   5  18 -20 2190.50  164.00
   5  18 -19  124.10   57.30
   5  18 -18  434.90   81.80
   5  18 -17 1730.50   90.90
   5  18 -16  719.20   49.20
   5  18 -15 4163.50  154.70
   5  18 -14 2867.10  120.70
   5  18 -13  182.00   31.90
   5  18 -12  376.70   25.30
   5  18 -11 1597.60   59.30
   5  18 -10 1879.40   60.70
   5  18  -9  645.00   30.90
   5  18  -8  737.10   31.90
   5  18  -7   17.80   12.80
   5  18  -6  355.70   22.80
   5  18  -5  149.10   15.00
   5  18  -4 4233.00  111.40
   5  18  -3   35.50   12.40
   5  18  -2  308.60   19.10
   5  18  -1  949.10   35.60
   5  18   016195.60  348.50
   5  18   1 7392.30  174.80
   5  18   2 1536.20   48.00
   5  18   3 6477.10  167.50
   5  18   4  -21.70   14.30
   5  18   5  302.60   21.50
   5  18   6 3422.60   96.90
   5  18   7  133.30   20.10
   5  18   8  595.70   32.60
   5  18   9   41.30   16.60
   5  18  10   42.20   17.60
   5  18  11  468.10   30.90
   5  18  12 1543.80   62.30
   5  18  13  176.40   21.40
   5  18  14  184.40   24.70
   5  18  15  204.20   24.40
   5  18  16 1620.30   63.20
   5  18  17  397.90   32.00
   5  18  18 1637.00   68.00
   5  18  19   11.90   20.00
   5  18  20  120.70   22.30
   5  18  21  299.10   30.10
   5  18  22 2354.60   97.80
   5  18  23 1652.10   82.20
   5  18  24   40.60   25.20
   5  18  25 2624.20  116.20
   5  19 -26   -0.80   41.50
   5  19 -25  247.20   77.10
   5  19 -24   14.20   46.70
   5  19 -23  203.00   62.50
   5  19 -22  996.50   96.20
   5  19 -21 2412.90  158.90
   5  19 -20  225.40   63.00
   5  19 -19 4529.30  284.20
   5  19 -18 3461.90  229.40
   5  19 -17 1150.70  109.90
   5  19 -16   -0.60   37.70
   5  19 -15   71.10   46.90
   5  19 -14  308.70   78.90
   5  19 -13   97.10   55.20
   5  19 -12 1730.30  129.30
   5  19 -11 2690.90  186.50
   5  19 -10  523.10   84.30
   5  19  -9  222.50   64.40
   5  19  -8    3.20   15.40
   5  19  -7  221.00   25.60
   5  19  -6  371.10   28.20
   5  19  -5  616.20   42.60
   5  19  -4   14.20   18.40
   5  19  -3  592.90   36.30
   5  19  -2 3813.40  131.90
   5  19  -1  716.50   42.30
   5  19   0  -31.90   38.30
   5  19   1 2022.50   78.50
   5  19   2  627.70   30.70
   5  19   3   82.90   16.00
   5  19   4 5919.40  154.30
   5  19   5 1445.00   54.50
   5  19   6 2725.80   87.00
   5  19   7 3667.00  110.50
   5  19   8 1104.40   45.60
   5  19   9 1339.70   50.90
   5  19  10  862.80   43.20
   5  19  11   42.90   17.20
   5  19  12  635.80   36.20
   5  19  13 4353.90  134.50
   5  19  14  482.40   36.80
   5  19  15 4367.20  141.60
   5  19  16  252.30   26.30
   5  19  17  267.30   27.30
   5  19  18 1372.10   67.50
   5  19  19  222.20   26.30
   5  19  20 1867.60  102.60
   5  19  21   41.60   31.40
   5  19  22 1760.60  103.60
   5  19  23  200.80   35.70
   5  19  24  624.60   52.50
   5  20 -25  215.30   54.60
   5  20 -24  358.60   76.40
   5  20 -23  -13.20   43.70
   5  20 -22 1504.70  147.10
   5  20 -21  328.40   65.30
   5  20 -20  588.90   92.40
   5  20 -19   19.30   49.10
   5  20 -18  977.90  104.60
   5  20 -17  186.50   56.10
   5  20 -16 1094.30  122.60
   5  20 -15  776.60   91.70
   5  20 -14 4593.50  287.80
   5  20 -13  107.40   58.70
   5  20 -12 6770.50  391.10
   5  20 -11  116.00   53.30
   5  20 -10 1348.30  120.10
   5  20  -9 4152.90  267.40
   5  20  -8  450.90   68.50
   5  20  -7 7348.70  357.20
   5  20  -6 4244.20  259.00
   5  20  -5 5944.30  300.90
   5  20  -4 1827.20   78.40
   5  20  -3  235.00   27.30
   5  20  -2 2240.90   91.10
   5  20  -1 1780.50   79.50
   5  20   0 6315.40  203.50
   5  20   1   79.20   21.50
   5  20   2 1039.90   56.80
   5  20   3  211.70   40.50
   5  20   4 2596.00  110.20
   5  20   5  388.10   40.90
   5  20   6 3060.90  130.00
   5  20   7   55.10   25.20
   5  20   8 2049.10  104.60
   5  20   9  826.20   48.70
   5  20  10 8659.30  302.50
   5  20  11  318.60   33.60
   5  20  12    6.80   23.20
   5  20  13  127.10   30.00
   5  20  14 2331.40  106.50
   5  20  15  253.50   41.40
   5  20  16 1292.10   79.00
   5  20  17  540.50   51.90
   5  20  18  224.70   26.40
   5  20  19   -1.20   28.20
   5  20  20   52.80   28.60
   5  20  21  125.20   39.80
   5  20  22  984.30   67.90
   5  20  23 1861.40  106.00
   5  21 -24   81.50   56.80
   5  21 -23 5014.70  341.10
   5  21 -22  -18.50   74.00
   5  21 -21  618.50  101.50
   5  21 -20   21.60   53.80
   5  21 -19 2943.60  166.00
   5  21 -18 1351.80  111.10
   5  21 -17  381.80   62.50
   5  21 -16  476.70   55.60
   5  21 -15  -20.90   48.00
   5  21 -14  -56.60   52.00
   5  21 -13   -4.50   51.30
   5  21 -12   45.70   50.30
   5  21 -11  -70.20   51.80
   5  21 -10  193.60   50.40
   5  21  -9 2974.90  186.10
   5  21  -8 1278.00  128.10
   5  21  -7  -55.80   48.50
   5  21  -6 2623.60  165.80
   5  21  -5 4774.90  255.60
   5  21  -4  172.00   42.50
   5  21  -3 1189.90   96.10
   5  21  -2  969.20  100.10
   5  21  -1  239.20   50.10
   5  21   0 1268.40   98.20
   5  21   1  106.00   23.00
   5  21   2 3847.10  148.10
   5  21   3 1333.20   70.60
   5  21   4 7470.70  262.00
   5  21   5 4056.90  162.20
   5  21   6  928.00   54.20
   5  21   7   34.00   25.30
   5  21   8 1078.00   61.60
   5  21   910261.10  330.90
   5  21  10  543.10   42.10
   5  21  1111041.90  357.80
   5  21  12   81.30   33.70
   5  21  13 3851.80  176.90
   5  21  14  314.20   35.80
   5  21  15  132.10   32.80
   5  21  16 2364.60  119.30
   5  21  17  504.30   47.20
   5  21  18 1231.70   78.80
   5  21  19  -66.10   24.30
   5  21  20  330.40   43.20
   5  21  21  -14.20   29.70
   5  22 -22  -44.90   51.20
   5  22 -21  912.40  111.10
   5  22 -20  571.00   90.80
   5  22 -19  588.00   86.50
   5  22 -18   94.80   52.10
   5  22 -17   79.00   53.80
   5  22 -16  248.70   69.00
   5  22 -15  445.20   73.50
   5  22 -14 1994.40  157.60
   5  22 -13  382.40   59.40
   5  22 -12 2336.30  169.40
   5  22 -11   76.30   58.00
   5  22 -10  472.20   71.50
   5  22  -910297.90  533.50
   5  22  -8 6497.90  359.30
   5  22  -722885.20  966.60
   5  22  -6   40.50   65.00
   5  22  -521867.60  909.20
   5  22  -4 1370.40   97.80
   5  22  -3 1294.80  119.60
   5  22  -2  587.20   67.10
   5  22  -1 5983.40  298.10
   5  22   0 2053.00  153.70
   5  22   1 2046.20  142.10
   5  22   2 1656.70  112.10
   5  22   3 1532.20  113.30
   5  22   4  205.20   51.30
   5  22   5 2002.00  129.50
   5  22   6  134.30   28.30
   5  22   7 1048.70   59.70
   5  22   8  421.70   42.80
   5  22   9 2615.50  112.80
   5  22  10 1988.90   94.80
   5  22  11  883.60   63.30
   5  22  12  576.20   47.20
   5  22  13  281.50   34.80
   5  22  14    4.10   26.00
   5  22  15   74.60   38.80
   5  22  16  230.50   39.30
   5  22  17   77.50   32.80
   5  22  18   33.70   33.90
   5  22  19  -29.10   29.70
   5  22  20 1172.70   74.90
   5  23 -20 1565.10  131.20
   5  23 -19  131.60   62.80
   5  23 -18  117.00   62.20
   5  23 -17  133.70   76.30
   5  23 -16  592.80   79.00
   5  23 -15  358.10   80.50
   5  23 -14  211.70   51.80
   5  23 -13  995.80   93.60
   5  23 -12 1908.00  139.30
   5  23 -11   84.60   38.50
   5  23 -10  412.30   69.60
   5  23  -9  152.50   52.70
   5  23  -8   34.90   51.90
   5  23  -7  816.40   99.30
   5  23  -6  315.00   62.50
   5  23  -5 1976.70  152.20
   5  23  -4  -57.60   43.80
   5  23  -3  297.00   66.00
   5  23  -2 1738.70  140.70
   5  23  -1  263.00   61.10
   5  23   0 2034.70  158.40
   5  23   1  145.60   60.00
   5  23   2  925.10   86.50
   5  23   3    2.60   33.90
   5  23   4  390.50   59.30
   5  23   5  263.60   50.80
   5  23   6  524.00   83.00
   5  23   7  477.50   62.70
   5  23   8 3239.50  195.40
   5  23   9 9254.50  469.30
   5  23  10  569.30   79.20
   5  23  11 9783.30  559.00
   5  23  12 3623.70  209.70
   5  23  13 3646.70  219.70
   5  23  14 2518.90  195.20
   5  23  15   58.00   45.00
   5  23  16   74.10   30.30
   5  23  17  653.20   92.20
   5  23  18   14.80   37.10
   5  24 -18   53.80   46.80
   5  24 -17  -18.70   48.80
   5  24 -16  532.80   82.80
   5  24 -15  120.90   61.80
   5  24 -14 1714.00  156.70
   5  24 -13  162.20   61.80
   5  24 -12  270.70   66.30
   5  24 -11   49.90   46.70
   5  24 -10 1524.80  101.60
   5  24  -9  806.00   86.00
   5  24  -8 3566.20  207.20
   5  24  -7 6110.50  385.90
   5  24  -6 1631.90  140.70
   5  24  -5 8330.50  426.40
   5  24  -4 5106.20  289.50
   5  24  -3 1845.70  134.80
   5  24  -2  453.70   69.90
   5  24  -1   43.90   44.60
   5  24   0  136.20   56.40
   5  24   1 2789.50  177.10
   5  24   2  157.40   51.20
   5  24   3 2406.40  159.40
   5  24   4  -11.90   37.30
   5  24   5  -14.40   31.60
   5  24   6   -0.70   33.50
   5  24   7 1300.20   97.60
   5  24   8  864.20   83.80
   5  24   9   25.90   38.70
   5  24  10  -36.00   39.50
   5  24  11 2214.90  167.50
   5  24  12  453.30   64.10
   5  24  13 1551.90  153.20
   5  24  14   36.90   31.80
   5  24  15   25.20   35.20
   5  24  16  858.10   81.10
   5  25 -16    6.10   44.60
   5  25 -15   13.90   48.30
   5  25 -14  541.20   66.80
   5  25 -13   11.70   53.20
   5  25 -12  562.10  100.30
   5  25 -11   24.30   53.90
   5  25 -10   56.10   51.90
   5  25  -9 2439.40  173.10
   5  25  -8 1136.30  108.60
   5  25  -7  321.10   63.90
   5  25  -6 1114.70  110.40
   5  25  -5 1414.10  152.20
   5  25  -4  503.00   77.10
   5  25  -3  315.00   55.50
   5  25  -2   50.40   39.80
   5  25  -1  -64.00   47.10
   5  25   0  755.90   83.10
   5  25   1  107.80   41.90
   5  25   2  763.90   79.70
   5  25   3  709.00   85.20
   5  25   4  117.40   44.80
   5  25   5 1417.60  128.70
   5  25   6  595.30   72.20
   5  25   7 2215.00  206.10
   5  25   8  286.10   53.10
   5  25   9  128.00   48.00
   5  25  10  -60.80   32.00
   5  25  11 2073.80  165.20
   5  25  12  394.30   68.60
   5  25  13 2000.40  157.30
   5  26 -12  -67.80   40.40
   5  26 -11 1597.40  142.80
   5  26 -10   91.40   44.10
   5  26  -9  -62.50   42.60
   5  26  -8   28.80   45.40
   5  26  -7 3850.40  261.30
   5  26  -6   -1.30   48.90
   5  26  -5  642.50  101.60
   5  26  -4  373.40   79.20
   5  26  -3 1439.10  144.10
   5  26  -2  331.30   68.70
   5  26  -1 1417.50  144.70
   5  26   0  -42.10   43.10
   5  26   1 1161.90  122.90
   5  26   2 1352.90  129.20
   5  26   3   88.20   44.40
   5  26   4  366.60   58.90
   5  26   5  -79.50   35.50
   5  26   6    9.90   39.10
   5  26   7  108.80   52.80
   5  26   8  384.40   62.10
   5  26   9  -20.40   36.70
   5  26  10  963.80   95.50
   5  27  -7    8.40   44.50
   5  27  -6  132.20   48.60
   5  27  -5  565.60   70.80
   5  27  -4   25.10   53.10
   5  27  -3 2988.70  226.80
   5  27  -2  245.30   64.00
   5  27  -1  564.00   94.80
   5  27   0   16.80   44.20
   5  27   1  103.60   47.40
   5  27   2  106.40   48.80
   5  27   3  601.80   73.80
   5  27   4  207.80   50.50
   5  27   5 2374.30  182.50
   6   0 -36 1091.60   69.90
   6   0 -35    9.80   29.90
   6   0 -34   82.40   30.60
   6   0 -33   22.30   25.90
   6   0 -32 1436.80   82.50
   6   0 -31   15.30   28.20
   6   0 -30 1170.10   72.10
   6   0 -29    0.30   35.90
   6   0 -28 3045.30  129.30
   6   0 -27  -11.50   30.90
   6   0 -26  429.60   43.60
   6   0 -25  -38.90   22.20
   6   0 -24  261.70   33.40
   6   0 -23  -22.30   23.80
   6   0 -22 3204.50  116.30
   6   0 -21  -58.80   29.80
   6   0 -20 5166.90  184.60
   6   0 -19  -69.30   23.00
   6   0 -18 4657.90  157.10
   6   0 -17   23.00   39.00
   6   0 -1615970.10  434.90
   6   0 -15  -26.10   15.60
   6   0 -14 2698.80  102.40
   6   0 -13  -28.00   16.60
   6   0 -12 1764.90   56.40
   6   0 -11   10.70   10.30
   6   0 -1016788.30  372.80
   6   0  -9   15.20    7.20
   6   0  -8  111.70    9.90
   6   0  -7   -1.40    8.20
   6   0  -6 2197.50   53.90
   6   0  -5   20.60    8.70
   6   0  -3   69.30    9.80
   6   0  -1   21.90    7.70
   6   0   024749.40  517.60
   6   0   1    9.70    7.10
   6   0   2  908.50   25.00
   6   0   3   13.80    7.40
   6   0   445745.50 1535.70
   6   0   5   16.10    8.60
   6   0   622388.30  419.50
   6   0   7   17.20    8.10
   6   0   8  719.80   40.90
   6   0   9   -5.50   13.40
   6   0  10 1597.90   53.40
   6   0  11   16.80   12.80
   6   0  12  885.70   35.80
   6   0  13   -9.50   16.00
   6   0  1417475.20  493.30
   6   0  15  -31.50   20.90
   6   0  1622707.80  556.10
   6   0  17   -5.50   17.00
   6   0  18  421.70   32.90
   6   0  19   -0.30   20.30
   6   0  20 3753.50  138.40
   6   0  21    6.50   24.40
   6   0  22   31.40   26.80
   6   0  23   12.80   34.00
   6   0  24 2108.80   99.50
   6   0  25  -32.30   39.80
   6   0  26 2205.60  111.50
   6   0  27   10.50   32.30
   6   0  28  642.90   57.90
   6   0  29   29.50   35.80
   6   0  30 2164.60  127.20
   6   0  31   64.50   36.10
   6   0  32 1153.20   81.60
   6   0  33   -5.00   33.00
   6   1 -36   -8.40   22.30
   6   1 -35  404.60   36.50
   6   1 -34   29.70   23.80
   6   1 -33  -21.40   23.30
   6   1 -32  191.20   30.60
   6   1 -31  346.70   29.70
   6   1 -30   42.50   21.10
   6   1 -29  194.50   30.80
   6   1 -28 5866.00  144.50
   6   1 -27 1946.00   63.60
   6   1 -26 1847.00   58.10
   6   1 -25 1818.70   60.90
   6   1 -24  543.50   30.60
   6   1 -23  870.40   36.10
   6   1 -22 7968.60  176.20
   6   1 -21 3146.80   83.30
   6   1 -2019635.50  379.40
   6   1 -19 1135.20   36.90
   6   1 -18 5929.50  131.10
   6   1 -17 9106.20  191.00
   6   1 -16   46.60   13.80
   6   1 -15 2456.90   64.40
   6   1 -1411168.50  225.30
   6   1 -13 1250.40   31.90
   6   1 -12   94.50    8.40
   6   1 -11  139.50    9.00
   6   1 -10  232.90   10.00
   6   1  -9  406.90   11.90
   6   1  -8 4705.50   70.50
   6   1  -7 7157.50  101.20
   6   1  -6   93.70    6.80
   6   1  -5  729.60   16.50
   6   1  -4 5282.40   83.70
   6   1  -340909.90  979.10
   6   1  -239930.00  941.20
   6   1  -1 5590.50   81.70
   6   1   0  203.10    7.40
   6   1   1 3139.10   49.40
   6   1   217660.90  231.00
   6   1   3 4504.60   66.30
   6   1   4 1285.30   24.20
   6   1   5 4311.60   65.30
   6   1   6 5650.10   83.90
   6   1   7   85.80    7.00
   6   1   813139.60  339.80
   6   1   9 1379.30   40.10
   6   1  10 5389.50  114.40
   6   1  11  210.50   13.80
   6   1  12 6615.50  140.10
   6   1  13 5172.20  126.60
   6   1  1481306.00 2782.50
   6   1  15 7007.90  145.80
   6   1  1621562.30  394.50
   6   1  17 3868.40   92.80
   6   1  18  108.20   16.10
   6   1  19 1776.30   51.80
   6   1  20  214.40   20.30
   6   1  21   81.80   18.30
   6   1  22 3764.70  106.80
   6   1  23  295.30   27.80
   6   1  24 2718.80   83.60
   6   1  25 1706.30   63.60
   6   1  26  619.60   37.90
   6   1  27   77.90   22.70
   6   1  28   54.40   22.60
   6   1  29  917.80   52.60
   6   1  30 1728.30   77.70
   6   1  31  685.70   45.50
   6   1  32 3712.30  125.90
   6   1  33  -26.10   21.70
   6   2 -36   36.60   25.60
   6   2 -35  678.60   44.70
   6   2 -34 1121.70   52.30
   6   2 -33 1166.30   55.20
   6   2 -32  860.70   45.60
   6   2 -31 1896.40   70.10
   6   2 -30 2529.60   81.80
   6   2 -29  160.30   30.90
   6   2 -28 6788.50  164.90
   6   2 -27  606.40   38.30
   6   2 -26 1151.80   43.80
   6   2 -25 3373.70   85.70
   6   2 -24  159.40   19.20
   6   2 -23 3008.70   72.10
   6   2 -22  512.10   29.10
   6   2 -21  190.80   18.60
   6   2 -20  224.00   17.90
   6   2 -19   55.80   16.20
   6   2 -18 1841.40   45.90
   6   2 -17 5417.40  112.40
   6   2 -16   92.40   14.00
   6   2 -15  596.80   23.70
   6   2 -14 1815.00   39.00
   6   2 -13 3421.70   63.30
   6   2 -12  493.70   16.70
   6   2 -11  996.20   24.30
   6   2 -10  302.70   11.20
   6   2  -9 5587.80   82.00
   6   2  -8  600.40   13.80
   6   2  -7 2914.60   43.50
   6   2  -6  345.90    9.60
   6   2  -5 3993.20   57.80
   6   2  -417452.20  223.10
   6   2  -3  254.00    8.70
   6   2  -220328.40  275.80
   6   2  -1 1772.50   29.70
   6   2   0 2297.60   36.50
   6   2   1 2658.20   42.60
   6   2   2   74.10    5.50
   6   2   3  475.50   11.40
   6   2   4  219.60    8.20
   6   2   5 4948.90   71.10
   6   2   6 3560.60   57.30
   6   2   736111.00  917.40
   6   2   8  267.90   15.60
   6   2   913787.00  314.40
   6   2  10  753.50   28.20
   6   2  11 1323.70   43.00
   6   2  12 1192.60   38.60
   6   2  13 8164.20  202.40
   6   2  1445814.30  879.10
   6   2  1525443.10  495.20
   6   2  1649001.50  872.10
   6   2  17  117.60   16.70
   6   2  18  155.00   18.00
   6   2  19 4855.30  122.30
   6   2  20 3963.10  109.00
   6   2  21  774.00   36.60
   6   2  22  466.20   32.40
   6   2  23   -2.90   22.20
   6   2  24 1093.50   51.00
   6   2  25 1916.30   71.50
   6   2  26 1781.70   63.10
   6   2  27   70.90   22.10
   6   2  28  417.50   34.30
   6   2  29  764.20   44.60
   6   2  30   46.90   23.10
   6   2  31  303.60   33.80
   6   2  32  116.00   27.90
   6   2  33 1319.20   65.50
   6   3 -36  419.80   34.00
   6   3 -35    2.90   25.20
   6   3 -34 2545.60   77.00
   6   3 -33  -25.70   24.00
   6   3 -32  919.30   42.50
   6   3 -31  105.90   25.50
   6   3 -30   65.20   24.80
   6   3 -29 1532.20   60.40
   6   3 -28  309.70   30.50
   6   3 -27 1725.30   56.20
   6   3 -26   -3.80   19.40
   6   3 -25 2629.30   70.10
   6   3 -24  -10.00   18.30
   6   3 -23   10.70   16.30
   6   3 -22  352.60   22.70
   6   3 -21  255.70   22.10
   6   3 -20 1079.50   35.80
   6   3 -19  298.90   19.30
   6   3 -18 2808.00   63.20
   6   3 -17 1289.80   38.20
   6   3 -1615532.40  293.20
   6   3 -15   -7.20    9.60
   6   3 -14 2046.50   41.50
   6   3 -13 6438.10  117.70
   6   3 -12 1759.60   35.90
   6   3 -11 8172.30  144.10
   6   3 -10  479.10   14.00
   6   3  -912399.80  164.50
   6   3  -8 1168.50   21.00
   6   3  -730829.70  444.60
   6   3  -6 2551.30   40.10
   6   3  -5 3779.40   55.60
   6   3  -4  146.30    7.30
   6   3  -3  647.80   13.60
   6   3  -222981.70  345.60
   6   3  -1   26.10    4.50
   6   3   0 5029.80   71.90
   6   3   1 7528.00  107.60
   6   3   214275.50  188.20
   6   3   3 1600.70   28.70
   6   3   418096.80  234.30
   6   3   5 1827.30   32.10
   6   3   6 3403.30   63.50
   6   3   7  632.90   20.60
   6   3   8 4832.60  109.70
   6   3   9  717.80   25.00
   6   3  10 4072.60   94.20
   6   3  11  883.70   29.70
   6   3  12  290.50   18.10
   6   3  13 2138.50   63.20
   6   3  14  198.20   18.50
   6   3  15  199.50   21.90
   6   3  16  246.90   19.00
   6   3  17 1059.90   40.70
   6   3  18 8602.20  194.70
   6   3  19 1074.30   44.90
   6   3  2013004.70  288.30
   6   3  21 2048.80   66.20
   6   3  22  530.90   31.50
   6   3  23 4642.70  125.30
   6   3  24 1858.60   65.10
   6   3  25 7555.00  191.50
   6   3  26  412.50   30.40
   6   3  27   72.10   26.70
   6   3  28 7786.20  210.80
   6   3  29  894.10   50.50
   6   3  30  101.90   27.90
   6   3  31  596.10   43.90
   6   3  32 7462.90  214.70
   6   3  33  352.70   53.30
   6   4 -36   64.90   29.80
   6   4 -35 1029.40   52.70
   6   4 -34 5001.10  146.40
   6   4 -33 2056.70   74.80
   6   4 -32 4521.20  127.90
   6   4 -31  429.10   33.00
   6   4 -30  632.80   35.10
   6   4 -29 1773.80   61.40
   6   4 -28  817.00   40.40
   6   4 -27  486.20   30.60
   6   4 -26 1480.00   46.40
   6   4 -25 2894.10   75.30
   6   4 -24  307.20   23.90
   6   4 -23 3006.10   77.20
   6   4 -22 1725.00   49.00
   6   4 -21 7115.30  150.60
   6   4 -20   60.50   16.70
   6   4 -19 8029.00  156.40
   6   4 -18 5112.90  106.40
   6   4 -17 4561.60   98.20
   6   4 -16 1913.20   53.00
   6   4 -1513451.10  244.80
   6   4 -1411643.40  193.60
   6   4 -13 5035.40   91.40
   6   4 -12  650.00   20.20
   6   4 -11  864.70   23.70
   6   4 -10   47.20    6.80
   6   4  -9 2551.00   48.60
   6   4  -8 1113.90   20.50
   6   4  -7 2883.50   44.40
   6   4  -6 4183.20   59.30
   6   4  -5 8384.60  112.10
   6   4  -4  268.30    7.10
   6   4  -3   46.30    4.00
   6   4  -2 1545.00   26.00
   6   4  -111804.80  154.60
   6   4   0 6369.40   89.00
   6   4   1 2797.40   44.00
   6   4   2 2552.90   41.40
   6   4   3  101.20    6.10
   6   4   4 3081.10   48.50
   6   4   5 7090.20  107.30
   6   4   6  234.60   10.10
   6   4   719631.10  300.20
   6   4   8  497.50   19.90
   6   4   911142.80  217.40
   6   4  10 5180.10  110.70
   6   4  11 3707.10   81.70
   6   4  12  423.80   20.20
   6   4  13  525.90   24.10
   6   4  1410869.00  244.10
   6   4  15   68.30   13.00
   6   4  16 4092.70   99.30
   6   4  17  106.40   15.20
   6   4  18 4484.40  108.70
   6   4  19 5733.30  136.10
   6   4  2010366.90  230.70
   6   4  2111038.90  249.70
   6   4  22 2598.80   84.80
   6   4  23  203.00   25.40
   6   4  24   -0.70   21.30
   6   4  25  393.30   30.20
   6   4  26 2005.50   74.30
   6   4  27  958.80   48.80
   6   4  28 3838.30  120.30
   6   4  29   60.90   24.30
   6   4  30  253.80   31.50
   6   4  31  234.50   32.00
   6   4  32  113.50   23.90
   6   4  33  697.20   82.60
   6   5 -36  134.50   34.30
   6   5 -35   87.90   25.90
   6   5 -34  159.00   33.00
   6   5 -33  -31.90   24.40
   6   5 -32 1015.20   50.40
   6   5 -31  359.40   33.30
   6   5 -30   47.80   23.70
   6   5 -29  307.10   27.30
   6   5 -28   42.50   19.20
   6   5 -27  549.00   29.40
   6   5 -26  116.10   19.70
   6   5 -25 1730.60   52.60
   6   5 -24  377.90   25.40
   6   5 -23  514.40   27.10
   6   5 -22 1844.00   53.60
   6   5 -21 1239.60   40.70
   6   5 -20 9370.20  180.10
   6   5 -19 2599.40   63.90
   6   5 -18 4189.20   96.30
   6   5 -1716266.10  367.00
   6   5 -15 3122.10   82.50
   6   5 -1428456.10  460.20
   6   5 -13 4375.80   84.70
   6   5 -12 1553.70   36.40
   6   5 -11 9074.80  161.80
   6   5 -10  420.90   13.20
   6   5  -9 2835.20   51.60
   6   5  -810735.20  155.10
   6   5  -7 1610.00   27.60
   6   5  -6  403.70    9.60
   6   5  -5  195.20    9.90
   6   5  -4 6421.60  111.20
   6   5  -3 8194.80  135.90
   6   5  -2 2746.20   40.70
   6   5  -1 2069.80   33.00
   6   5   0 9712.20  133.30
   6   5   111025.20  149.00
   6   5   324583.80  335.20
   6   5   439935.30  798.90
   6   5   5 7194.00  111.10
   6   5   6 4947.20   88.90
   6   5   7 3970.90   73.40
   6   5   8   39.10    9.30
   6   5   9 5582.70  126.70
   6   5  10 9664.10  190.70
   6   5  11  201.80   15.60
   6   5  12 2172.30   57.60
   6   5  13  -23.70   11.90
   6   5  14 1502.30   49.90
   6   5  15 1377.70   43.50
   6   5  16  374.20   20.60
   6   5  17  596.10   24.40
   6   5  18  835.20   31.70
   6   5  19 1380.60   45.60
   6   5  20  365.20   26.40
   6   5  21 2195.40   67.60
   6   5  22  106.30   18.90
   6   5  23 2694.20   81.60
   6   5  24  426.20   28.80
   6   5  25 2160.40   71.00
   6   5  26   44.20   21.70
   6   5  27  535.30   35.10
   6   5  28 4961.50  154.20
   6   5  29  -29.10   26.90
   6   5  30 1448.00   67.30
   6   5  31   -6.90   20.90
   6   5  32    8.80   25.10
   6   5  33  -75.40   40.80
   6   6 -35  588.80   39.20
   6   6 -34 3396.70  109.20
   6   6 -33  -14.30   25.80
   6   6 -32 5620.50  154.00
   6   6 -31  574.90   36.90
   6   6 -30 3491.60  100.30
   6   6 -29 1414.30   52.60
   6   6 -28   11.50   20.30
   6   6 -27  462.10   29.60
   6   6 -26 3232.20   85.70
   6   6 -25  690.20   33.70
   6   6 -24  259.80   23.20
   6   6 -23 1130.70   42.30
   6   6 -22  449.80   26.00
   6   6 -21  522.80   26.90
   6   6 -20  827.10   31.90
   6   6 -19  699.20   30.20
   6   6 -18 4192.20  115.40
   6   6 -17  -59.00   15.90
   6   6 -1643088.20  868.40
   6   6 -15   39.70   14.50
   6   6 -1448908.70  862.30
   6   6 -13 6026.10  104.40
   6   6 -12 2192.40   44.20
   6   6 -11  146.00   10.30
   6   6 -10 2977.20   50.50
   6   6  -9 7053.00  111.30
   6   6  -8 1071.90   22.60
   6   6  -7 2194.90   37.10
   6   6  -612313.60  191.50
   6   6  -5 2597.90   57.70
   6   6  -425115.00  383.90
   6   6  -3  656.50   18.40
   6   6  -216830.40  210.80
   6   6  -1   68.90    4.70
   6   6   010373.70  139.50
   6   6   1  475.70   12.40
   6   6   311391.60  169.90
   6   6   4 3605.20   62.20
   6   6   5  521.20   15.20
   6   6   6  122.40    8.20
   6   6   7 2020.90   43.40
   6   6   8  258.80   14.20
   6   6   9  995.30   32.90
   6   6  10 6386.70  135.00
   6   6  11 4880.00  107.80
   6   6  12  540.30   24.50
   6   6  13 3570.30   90.00
   6   6  14   35.70   13.30
   6   6  15 1352.60   43.30
   6   6  16 5415.50  115.90
   6   6  17  131.80   17.20
   6   6  18 7014.40  153.80
   6   6  19  287.40   21.20
   6   6  20 1513.80   50.40
   6   6  21 1009.00   39.60
   6   6  22  284.70   25.10
   6   6  23   58.60   18.90
   6   6  24  516.60   32.50
   6   6  25 3268.70  103.60
   6   6  26 2152.10   73.30
   6   6  27 1727.10   68.90
   6   6  28 1641.80   67.20
   6   6  29    2.10   26.90
   6   6  30  454.40   35.70
   6   6  31   61.90   25.40
   6   6  32   54.70   25.40
   6   7 -35  880.40   46.90
   6   7 -34   72.30   26.90
   6   7 -33  331.30   32.80
   6   7 -32  341.60   29.90
   6   7 -31  -90.70   21.50
   6   7 -30  291.20   29.50
   6   7 -29  874.20   39.60
   6   7 -28 1396.60   51.90
   6   7 -27   58.90   18.40
   6   7 -26  796.20   40.60
   6   7 -25   72.80   18.90
   6   7 -24  171.40   22.80
   6   7 -23    5.90   17.20
   6   7 -22   51.30   18.10
   6   7 -21   57.40   21.90
   6   7 -20 1420.60   43.20
   6   7 -19 1330.40   41.50
   6   7 -18 3178.80   71.80
   6   7 -17   19.90   16.30
   6   7 -1645635.30  891.50
   6   7 -1515317.40  297.60
   6   7 -1431549.60  552.50
   6   7 -13 3509.40   67.90
   6   7 -12 1942.30   40.10
   6   7 -11 2005.30   41.20
   6   7 -10 1113.40   23.70
   6   7  -9 1193.90   24.10
   6   7  -8 9097.80  133.50
   6   7  -713680.90  185.40
   6   7  -611597.20  202.40
   6   7  -528772.20  457.90
   6   7  -4   22.90    8.00
   6   7  -3 3332.50   64.30
   6   7  -2  457.60    9.60
   6   7  -1  883.00   17.50
   6   7   0 1592.30   27.50
   6   7   110422.70  147.90
   6   7   217861.30  250.30
   6   7   3  307.50   10.00
   6   7   4 4756.20   84.20
   6   7   5 5374.20   89.40
   6   7   6 1392.80   29.20
   6   7   7 7001.00  117.00
   6   7   8 5702.10  108.60
   6   7   922102.60  488.30
   6   7  1013026.70  251.60
   6   7  11 8681.60  175.80
   6   7  12  266.00   19.20
   6   7  13 2020.30   60.10
   6   7  14 4113.90   99.10
   6   7  15 5875.50  127.10
   6   7  16  336.20   22.00
   6   7  17 6853.50  153.50
   6   7  18  626.50   30.80
   6   7  19  371.60   24.10
   6   7  20  986.10   40.70
   6   7  21 4486.00  120.80
   6   7  22   10.20   19.50
   6   7  23 5459.70  137.30
   6   7  24  120.50   21.80
   6   7  25  353.10   29.10
   6   7  26 1450.70   61.50
   6   7  27  245.20   29.00
   6   7  28 4013.70  129.00
   6   7  29 1095.40   48.40
   6   7  30  255.90   31.00
   6   7  31 1520.80   63.10
   6   7  32  325.50   33.60
   6   8 -35  136.00   29.30
   6   8 -34 3411.00  107.40
   6   8 -33  446.80   40.60
   6   8 -32 2165.50   81.30
   6   8 -31  115.80   23.20
   6   8 -30  205.80   30.00
   6   8 -29  146.80   25.70
   6   8 -28 2257.50   79.00
   6   8 -27  809.40   44.00
   6   8 -26  422.30   31.90
   6   8 -25 2389.50   82.30
   6   8 -24  822.80   38.40
   6   8 -23  171.60   21.20
   6   8 -22 2601.10   74.20
   6   8 -21 1775.00   49.20
   6   8 -20 1277.20   40.20
   6   8 -19 6637.50  132.20
   6   8 -18  179.60   15.50
   6   8 -17  452.10   21.80
   6   8 -16  276.30   19.30
   6   8 -15 1034.70   28.80
   6   8 -14   24.80    9.40
   6   8 -13 6559.70  114.00
   6   8 -12 1945.10   43.70
   6   8 -11  728.80   19.40
   6   8 -10 4678.80   76.30
   6   8  -9   80.80    7.00
   6   8  -8  625.00   14.90
   6   8  -7  111.80    5.90
   6   8  -6 1340.10   33.50
   6   8  -5 6265.70  115.20
   6   8  -4 7051.10  127.20
   6   8  -3  232.80   11.10
   6   8  -2  408.30   10.10
   6   8  -1   27.90    4.50
   6   8   0 1088.60   20.80
   6   8   1 2886.00   50.20
   6   8   2  737.30   17.00
   6   8   3  250.20    8.50
   6   8   4 2182.80   40.30
   6   8   513863.90  209.00
   6   8   6  715.10   18.80
   6   8   715652.50  236.50
   6   8   8 1025.40   26.70
   6   8   9  586.90   27.40
   6   8  1024929.30  462.60
   6   8  11 2023.80   57.40
   6   8  1213003.60  265.00
   6   8  13 7424.10  157.10
   6   8  14 5193.10  119.60
   6   8  15  221.70   20.50
   6   8  1617338.60  338.20
   6   8  17 1270.40   40.30
   6   8  18 1896.80   57.70
   6   8  19 1647.10   58.10
   6   8  20  923.30   40.40
   6   8  21   50.30   17.90
   6   8  22  479.00   31.30
   6   8  23  207.30   23.00
   6   8  24 1203.10   45.90
   6   8  25 3720.10  108.30
   6   8  26 2512.50   93.50
   6   8  27 5405.90  156.60
   6   8  28  564.80   40.90
   6   8  29  769.60   45.10
   6   8  30   96.00   23.20
   6   8  31   42.20   22.00
   6   8  32  295.30   42.30
   6   9 -34  699.50   40.10
   6   9 -33    7.60   24.70
   6   9 -32  209.00   29.50
   6   9 -31  378.70   30.30
   6   9 -30  107.00   22.40
   6   9 -29   78.30   22.30
   6   9 -28 2572.10   79.40
   6   9 -27  588.20   31.80
   6   9 -26 2244.00   74.00
   6   9 -25  239.60   22.70
   6   9 -24  244.70   23.00
   6   9 -23  928.20   37.90
   6   9 -22 1322.30   48.30
   6   9 -21 1581.30   47.00
   6   9 -20   -6.70   13.80
   6   9 -19 2416.70   61.40
   6   9 -18 1384.80   40.20
   6   9 -1715790.40  295.80
   6   9 -16 1396.30   43.00
   6   9 -15   38.00   10.40
   6   9 -14 1965.00   45.60
   6   9 -13 1575.10   36.70
   6   9 -12 1993.90   45.30
   6   9 -11 5985.40  101.60
   6   9 -10 1629.40   33.70
   6   9  -9 2391.10   43.20
   6   9  -8  646.10   14.90
   6   9  -7 6468.90  103.00
   6   9  -618479.80  250.80
   6   9  -5 2829.80   44.70
   6   9  -410166.10  138.60
   6   9  -3 1766.70   29.60
   6   9  -2 5875.30   87.80
   6   9  -1 1157.70   21.60
   6   9   0 7314.00  108.40
   6   9   1 1813.70   33.00
   6   9   2  305.50    9.40
   6   9   3 8091.10  126.60
   6   9   4   45.30    6.40
   6   9   520015.40  293.70
   6   9   6 3063.90   56.70
   6   9   7   74.80    9.30
   6   9   8  353.50   14.70
   6   9   9  750.70   24.50
   6   9  10  204.40   16.50
   6   9  11  875.70   29.60
   6   9  12 1000.20   34.10
   6   9  13  140.30   15.70
   6   9  14 2927.80   76.00
   6   9  15   66.70   16.50
   6   9  16   37.80   16.60
   6   9  17  386.20   23.10
   6   9  18  235.50   18.70
   6   9  19 3514.60   95.30
   6   9  20  729.00   35.80
   6   9  21 6147.20  158.70
   6   9  22  749.90   42.10
   6   9  23 2061.50   66.90
   6   9  24  111.50   23.30
   6   9  25  178.20   24.50
   6   9  26 4566.80  132.70
   6   9  27 1175.50   55.10
   6   9  28 7114.50  188.90
   6   9  29   49.10   23.40
   6   9  30   -4.20   22.80
   6   9  31   86.70   25.20
   6  10 -34  209.20   35.70
   6  10 -33  976.50   46.70
   6  10 -32  479.50   36.10
   6  10 -31    8.60   20.60
   6  10 -30 1213.10   49.70
   6  10 -29   27.90   22.10
   6  10 -28 1164.60   48.20
   6  10 -27 1071.20   42.70
   6  10 -26  872.70   40.80
   6  10 -25 1460.80   52.70
   6  10 -24  960.00   39.70
   6  10 -23  148.20   21.30
   6  10 -22 3213.60   87.70
   6  10 -21 1811.00   52.60
   6  10 -20 1306.00   44.40
   6  10 -19 1791.50   51.80
   6  10 -18  607.80   27.70
   6  10 -17  320.40   19.60
   6  10 -16  123.60   15.30
   6  10 -15 4872.70   96.30
   6  10 -14  590.10   20.50
   6  10 -13 8222.30  148.80
   6  10 -12   50.50    9.20
   6  10 -11  157.00    9.50
   6  10 -1012520.00  188.20
   6  10  -9 3610.30   59.90
   6  10  -8 3430.00   56.50
   6  10  -7 3037.30   50.60
   6  10  -6 5172.00   83.40
   6  10  -517550.70  231.80
   6  10  -434469.70  484.10
   6  10  -3 4071.20   61.10
   6  10  -210903.50  150.10
   6  10  -112042.60  164.60
   6  10   0   76.30    5.60
   6  10   137551.20  586.80
   6  10   2  118.60    7.30
   6  10   3 9877.80  149.20
   6  10   4 4834.80   79.00
   6  10   5 3633.40   63.00
   6  10   621745.50  314.20
   6  10   7  252.40   11.40
   6  10   8 2583.60   58.30
   6  10   9  382.80   15.50
   6  10  10  283.20   16.30
   6  10  11 2407.80   61.30
   6  10  12 3369.90   84.70
   6  10  13  -15.10   13.40
   6  10  14 3899.30   97.40
   6  10  1511158.10  234.10
   6  10  1628845.00  538.50
   6  10  1711584.10  239.60
   6  10  18 4454.00  110.60
   6  10  19   40.90   19.30
   6  10  20 1156.50   46.90
   6  10  21 1667.40   60.40
   6  10  22    7.20   18.80
   6  10  23  161.80   22.60
   6  10  24  183.80   23.80
   6  10  25  354.20   28.30
   6  10  26   19.40   19.60
   6  10  27  201.00   26.80
   6  10  28 1331.30   59.40
   6  10  29  491.10   40.90
   6  10  30  136.60   27.00
   6  10  31  676.00   38.10
   6  11 -33   39.60   32.20
   6  11 -32  286.70   34.60
   6  11 -31  351.90   34.40
   6  11 -30   25.10   20.10
   6  11 -29  242.60   26.00
   6  11 -28 3099.60   89.80
   6  11 -27 2124.60   67.80
   6  11 -26 2095.00   69.40
   6  11 -25 1771.60   62.50
   6  11 -24 1277.90   49.10
   6  11 -23 4210.10  111.30
   6  11 -2214214.90  299.50
   6  11 -2112571.80  266.20
   6  11 -20 9212.90  205.70
   6  11 -19 1635.80   49.80
   6  11 -18 1518.50   51.80
   6  11 -17 4098.20   97.20
   6  11 -16  257.60   18.20
   6  11 -15 4335.60   85.80
   6  11 -14 6034.90  115.30
   6  11 -13  119.70   11.10
   6  11 -12 2813.30   58.80
   6  11 -11  113.90    8.70
   6  11 -10 1148.40   24.60
   6  11  -9 1580.60   31.00
   6  11  -8 4560.30   73.00
   6  11  -7   50.90    5.80
   6  11  -6 1963.00   39.20
   6  11  -5 1637.30   29.50
   6  11  -4 1625.40   27.30
   6  11  -3 6161.90   87.20
   6  11  -2 3822.20   56.60
   6  11  -115608.00  206.70
   6  11   0  111.50    6.00
   6  11   1 1206.20   23.80
   6  11   2 2905.20   49.30
   6  11   3 6329.50   98.50
   6  11   4   22.90    5.70
   6  11   5   17.30    6.30
   6  11   6  276.20   12.10
   6  11   713253.20  225.60
   6  11   8  855.00   24.80
   6  11   9  945.20   27.30
   6  11  10 1528.20   44.00
   6  11  11 9070.20  196.40
   6  11  1210709.40  212.40
   6  11  1310530.70  215.60
   6  11  1432321.30  598.60
   6  11  15  588.50   28.30
   6  11  16 5443.00  127.90
   6  11  17 3836.70  100.00
   6  11  18 1754.00   54.40
   6  11  19  216.60   21.50
   6  11  20 1260.10   52.70
   6  11  21  150.80   22.40
   6  11  22 2804.40   93.20
   6  11  23  -25.80   19.40
   6  11  24  942.50   44.30
   6  11  25  -30.30   21.60
   6  11  26  392.70   31.50
   6  11  27  599.40   36.00
   6  11  28   64.80   22.60
   6  11  29 1238.00   63.70
   6  11  30   67.00   20.10
   6  12 -33  122.30   34.20
   6  12 -32  749.70   48.50
   6  12 -31 1295.50   70.90
   6  12 -30   -5.50   29.00
   6  12 -29   42.50   18.60
   6  12 -28  465.80   30.10
   6  12 -27 1647.60   61.90
   6  12 -26  397.50   27.00
   6  12 -25    8.80   19.60
   6  12 -24 1179.20   45.20
   6  12 -23   59.10   21.50
   6  12 -22  383.90   26.40
   6  12 -21   12.80   18.80
   6  12 -20 3578.80   97.70
   6  12 -19  892.40   38.30
   6  12 -18  173.90   16.30
   6  12 -17   31.00   15.70
   6  12 -16 3955.70   91.70
   6  12 -15   99.30   13.70
   6  12 -14 3546.60   72.50
   6  12 -13  361.60   14.80
   6  12 -12  138.80    9.90
   6  12 -11 5385.70   87.90
   6  12 -10 6844.80  107.80
   6  12  -926000.00  360.50
   6  12  -8 1708.30   31.40
   6  12  -7   43.90    6.00
   6  12  -611848.80  193.40
   6  12  -550390.90 1217.00
   6  12  -466406.00 2314.70
   6  12  -319467.40  277.40
   6  12  -246753.70  918.40
   6  12  -1  563.40   17.80
   6  12   0  721.30   23.40
   6  12   1  613.50   13.30
   6  12   2 7570.90  113.90
   6  12   3 2003.30   37.00
   6  12   4 7412.00  117.60
   6  12   5   77.80    7.40
   6  12   6  786.20   22.80
   6  12   7   -4.30    7.70
   6  12   8   24.40    9.10
   6  12   9  903.90   25.30
   6  12  10 1051.10   34.10
   6  12  11 3147.30   75.70
   6  12  12 3140.30   78.80
   6  12  13 4350.90  105.80
   6  12  14 2385.60   68.40
   6  12  15   64.90   17.40
   6  12  16 1992.10   60.00
   6  12  1714404.90  295.00
   6  12  18    8.20   16.60
   6  12  19 4329.30  112.00
   6  12  20  220.40   23.20
   6  12  21  126.70   24.00
   6  12  22 1060.30   47.80
   6  12  23   93.40   23.90
   6  12  24  793.80   40.50
   6  12  25  125.00   21.40
   6  12  26 2257.40   79.20
   6  12  27 1000.60   49.70
   6  12  28   26.40   21.50
   6  12  29  399.20   33.00
   6  12  30  561.90   38.20
   6  13 -32   22.10   29.40
   6  13 -31  574.60   45.80
   6  13 -30   10.60   25.60
   6  13 -29  245.00   30.90
   6  13 -28  593.50   43.80
   6  13 -27 4185.30  141.80
   6  13 -26  461.60   30.30
   6  13 -25 1523.80   54.10
   6  13 -24  477.30   32.30
   6  13 -23 1617.40   56.20
   6  13 -22 2288.90   71.10
   6  13 -21  222.60   22.60
   6  13 -20 1992.70   59.30
   6  13 -19  549.10   28.10
   6  13 -18   33.70   15.40
   6  13 -17 1487.00   42.30
   6  13 -16 4426.60  100.20
   6  13 -15  911.30   30.80
   6  13 -14 2209.70   55.50
   6  13 -13 1339.10   33.40
   6  13 -12   64.90    9.10
   6  13 -11  234.50   10.50
   6  13 -10 4723.00   79.10
   6  13  -9  277.80   11.00
   6  13  -8 1054.70   22.40
   6  13  -7 6276.90   97.30
   6  13  -6  938.40   19.40
   6  13  -5  505.80   12.80
   6  13  -412668.10  205.10
   6  13  -310856.10  210.20
   6  13  -215285.90  286.30
   6  13  -1 4142.50   85.00
   6  13   0   90.30   10.70
   6  13   113568.30  258.30
   6  13   2 4875.40  105.00
   6  13   3  853.40   19.50
   6  13   4 2414.40   46.30
   6  13   5  259.50   11.20
   6  13   6 2758.90   56.50
   6  13   7   40.90    7.40
   6  13   8 5950.70  113.10
   6  13   9  261.60   14.30
   6  13  10 4532.70  106.40
   6  13  11 5197.30  119.20
   6  13  12 1053.50   36.70
   6  13  1323236.00  446.90
   6  13  14 6940.20  155.80
   6  13  15 5878.40  146.60
   6  13  16 4456.00  112.90
   6  13  17 2179.80   65.80
   6  13  18  412.90   27.30
   6  13  19 1331.30   48.70
   6  13  20  583.50   33.10
   6  13  21  999.20   44.90
   6  13  22  865.10   47.50
   6  13  23   63.20   23.00
   6  13  24   31.10   21.00
   6  13  25 2724.20   82.60
   6  13  26  304.00   28.50
   6  13  27   49.20   22.80
   6  13  28  144.40   27.70
   6  13  29 1430.20   61.10
   6  14 -31 1023.10   59.70
   6  14 -30   67.00   27.60
   6  14 -29  -30.10   26.50
   6  14 -28 1151.40   64.00
   6  14 -27 1409.90   69.50
   6  14 -26 1839.90   81.80
   6  14 -25  893.60   53.20
   6  14 -24  872.20   51.00
   6  14 -23 2211.30   71.50
   6  14 -22   27.40   18.80
   6  14 -21  154.00   20.40
   6  14 -20  783.10   34.70
   6  14 -19 1241.20   44.00
   6  14 -18 8592.60  181.50
   6  14 -17  849.60   32.50
   6  14 -16   26.70   14.60
   6  14 -15 1796.10   53.50
   6  14 -14 5923.40  129.20
   6  14 -13    8.30   12.00
   6  14 -12 6993.20  146.40
   6  14 -11  563.10   19.00
   6  14 -10 2072.70   39.80
   6  14  -9  909.90   20.90
   6  14  -8  142.40    7.80
   6  14  -7   72.90    6.30
   6  14  -6 4398.70   76.10
   6  14  -510549.20  193.90
   6  14  -4  511.70   18.10
   6  14  -3  280.20   14.10
   6  14  -2   19.70    7.70
   6  14  -1   70.70    9.10
   6  14   0   20.50    8.90
   6  14   1 1541.10   39.10
   6  14   2 1005.70   30.10
   6  14   3  546.60   21.90
   6  14   4 6175.20  107.00
   6  14   5   55.40    7.10
   6  14   6 2615.70   56.40
   6  14   7 2206.20   54.00
   6  14   8 1312.00   41.60
   6  14   9 7669.50  171.50
   6  14  10  233.20   19.00
   6  14  11  583.20   29.80
   6  14  12 3145.80   79.60
   6  14  13 2295.00   68.10
   6  14  14 9272.70  215.10
   6  14  15  791.30   35.10
   6  14  16 4064.70  104.60
   6  14  17 7901.60  184.20
   6  14  18  327.50   23.20
   6  14  19 1379.50   50.50
   6  14  20   77.30   22.90
   6  14  21 3136.60   99.50
   6  14  22  249.90   24.70
   6  14  23 1124.50   50.70
   6  14  24  772.20   36.60
   6  14  25  303.90   26.80
   6  14  26 3286.40  108.70
   6  14  27  102.40   33.60
   6  14  28 2128.40   90.60
   6  15 -31  -50.10   53.30
   6  15 -30  446.80   42.60
   6  15 -29  195.90   31.10
   6  15 -28 2374.90   96.00
   6  15 -27   20.90   25.20
   6  15 -26    9.40   22.30
   6  15 -25  -33.30   21.20
   6  15 -24 2257.00   88.80
   6  15 -23 1207.30   57.90
   6  15 -22  286.80   31.50
   6  15 -21   99.70   22.60
   6  15 -20    7.80   15.90
   6  15 -19 1807.30   55.10
   6  15 -18 2217.40   63.80
   6  15 -17 1800.50   51.20
   6  15 -16 4388.30  102.90
   6  15 -15  102.90   16.20
   6  15 -14  131.90   15.40
   6  15 -13 5114.60  116.60
   6  15 -12   93.00   13.00
   6  15 -11  972.20   29.30
   6  15 -10 3523.60   79.40
   6  15  -9  137.00   11.80
   6  15  -8   55.20    7.50
   6  15  -7 3003.50   49.40
   6  15  -6   16.50    7.80
   6  15  -5 1919.90   47.40
   6  15  -4  289.40   13.70
   6  15  -3 1605.10   38.90
   6  15  -2  113.80   10.90
   6  15  -111244.50  212.70
   6  15   0  718.30   24.40
   6  15   1 1516.90   41.20
   6  15   2 5710.80  120.50
   6  15   3 6486.00  162.00
   6  15   439495.70  813.20
   6  15   510599.60  248.90
   6  15   616049.50  300.60
   6  15   7  939.70   30.90
   6  15   8 6200.90  133.20
   6  15   9   20.60   13.00
   6  15  10  390.70   23.10
   6  15  11  364.70   22.00
   6  15  12 1456.20   49.00
   6  15  13 2010.90   60.50
   6  15  14  173.40   22.30
   6  15  15   28.90   16.30
   6  15  16    3.30   15.80
   6  15  17  579.80   30.90
   6  15  18 4842.40  131.20
   6  15  19  194.50   23.30
   6  15  20 3835.30  109.00
   6  15  21 2702.20   99.50
   6  15  22 1042.50   55.70
   6  15  23  542.00   36.30
   6  15  24   27.80   24.80
   6  15  25 2473.30  107.50
   6  15  26  503.20   46.80
   6  15  27 1481.90   78.20
   6  15  28  585.50   45.40
   6  16 -30  424.30   69.60
   6  16 -29 1097.40   68.60
   6  16 -28  446.60   40.80
   6  16 -27   74.80   29.30
   6  16 -26   11.00   23.30
   6  16 -25  -18.20   21.00
   6  16 -24   91.10   26.60
   6  16 -23  -27.50   22.60
   6  16 -22  273.70   29.40
   6  16 -21  186.70   27.80
   6  16 -20  163.60   29.40
   6  16 -19  473.20   35.20
   6  16 -18 1097.50   49.00
   6  16 -17  911.10   47.10
   6  16 -16 1090.80   40.10
   6  16 -15 1361.90   43.80
   6  16 -14 9516.30  199.10
   6  16 -13 6950.30  151.90
   6  16 -12 8743.70  185.20
   6  16 -11  461.50   19.10
   6  16 -10 6990.70  142.40
   6  16  -9 2831.30   65.60
   6  16  -8  755.40   22.00
   6  16  -7   29.40   10.90
   6  16  -6 9290.70  211.40
   6  16  -5 1335.20   36.20
   6  16  -4 1524.10   38.10
   6  16  -3  242.50   14.40
   6  16  -2  171.70   12.60
   6  16  -1 5303.20  114.80
   6  16   0   37.70   11.30
   6  16   1  773.20   33.80
   6  16   2   20.80   18.40
   6  16   3  648.70   30.40
   6  16   4  210.90   18.40
   6  16   5  462.20   27.20
   6  16   6  537.90   25.80
   6  16   7  254.10   23.30
   6  16   8 8355.50  210.30
   6  16   9  321.70   26.40
   6  16  10   20.20   19.80
   6  16  11   29.20   18.50
   6  16  12   43.00   19.40
   6  16  13   51.50   20.70
   6  16  14  164.90   23.30
   6  16  15 4410.80  136.60
   6  16  16  192.50   25.00
   6  16  17 2328.00   83.10
   6  16  18  576.10   46.30
   6  16  19 3727.00  116.00
   6  16  20 4445.20  140.50
   6  16  21 7600.70  227.50
   6  16  22 9173.10  259.50
   6  16  23  133.60   26.40
   6  16  24 1586.70   82.30
   6  16  25 1688.90   90.90
   6  16  26  333.30   32.90
   6  16  27   88.00   23.70
   6  17 -28  232.70   61.60
   6  17 -27  967.80  108.50
   6  17 -26  -52.50   30.90
   6  17 -25 1053.70   71.50
   6  17 -24  270.10   40.00
   6  17 -23   87.90   39.10
   6  17 -22   72.30   36.60
   6  17 -21 1495.70   85.10
   6  17 -20   57.60   32.60
   6  17 -19 3161.20  116.10
   6  17 -18  245.10   30.90
   6  17 -17 8725.80  240.80
   6  17 -16 4231.80  135.10
   6  17 -15  467.90   30.80
   6  17 -14 1489.40   58.40
   6  17 -13 4177.50  142.20
   6  17 -12 4847.30  140.00
   6  17 -11  995.30   42.90
   6  17 -10 8687.90  206.40
   6  17  -9   80.50   13.90
   6  17  -8  344.60   22.30
   6  17  -7 5520.20  134.60
   6  17  -6   -9.40   11.50
   6  17  -5 1374.20   45.20
   6  17  -4  417.90   20.80
   6  17  -3  391.00   21.50
   6  17  -2 4635.30  120.60
   6  17  -1 2841.60   80.40
   6  17   0 1634.40   55.30
   6  17   1   19.60   15.10
   6  17   2 8600.50  204.30
   6  17   317933.50  403.50
   6  17   422112.60  486.00
   6  17   510200.50  230.40
   6  17   611785.70  273.80
   6  17   7 5160.20  134.90
   6  17   8 7829.60  200.40
   6  17   9 9305.50  238.00
   6  17  10  650.90   36.60
   6  17  11   46.90   20.80
   6  17  12 4729.90  139.30
   6  17  13  103.50   21.40
   6  17  14 4915.10  152.50
   6  17  15    9.30   20.50
   6  17  16 1773.30   68.90
   6  17  17  274.30   33.10
   6  17  18   -8.90   19.40
   6  17  19  936.70   48.10
   6  17  20  994.90   56.50
   6  17  21  460.70   34.50
   6  17  22   71.40   20.80
   6  17  23   45.70   25.40
   6  17  24  484.70   43.40
   6  17  25   -1.60   20.90
   6  17  26    8.30   21.90
   6  18 -27   75.90   49.70
   6  18 -26  188.50   48.60
   6  18 -25  765.30  100.10
   6  18 -24  219.10   59.60
   6  18 -23  348.40   65.20
   6  18 -22  -77.20   40.20
   6  18 -21 1697.70  133.50
   6  18 -20  -54.50   43.80
   6  18 -19 3159.80  150.90
   6  18 -18  263.90   36.50
   6  18 -17   17.50   32.90
   6  18 -16 2756.70  119.10
   6  18 -15 1789.20   86.20
   6  18 -14 2000.70   93.20
   6  18 -13 8145.20  275.50
   6  18 -12  526.70   36.10
   6  18 -11 1572.20   81.30
   6  18 -10 2303.40  102.20
   6  18  -912467.50  386.30
   6  18  -8 2392.20   78.60
   6  18  -7 1523.60   54.20
   6  18  -6   15.80   11.10
   6  18  -5   60.80   13.40
   6  18  -4 3089.30   84.90
   6  18  -3  178.60   17.30
   6  18  -2 4316.00  117.80
   6  18  -1 1639.90   54.40
   6  18   0   16.10   13.20
   6  18   1  323.60   20.20
   6  18   2 6374.00  161.10
   6  18   3 4541.80  122.00
   6  18   4 3704.00  130.70
   6  18   5   14.30   14.30
   6  18   6  -12.40   16.00
   6  18   7 2628.20   84.40
   6  18   8   34.20   17.30
   6  18   9  125.30   20.50
   6  18  10   22.40   19.60
   6  18  11 4586.40  141.10
   6  18  12   66.80   19.90
   6  18  13 4162.60  134.30
   6  18  14   69.50   21.00
   6  18  15  263.90   26.80
   6  18  16   13.10   21.70
   6  18  17  568.20   35.80
   6  18  18  134.10   24.30
   6  18  19   34.50   22.20
   6  18  20   64.90   19.10
   6  18  21  342.40   30.50
   6  18  22 1060.70   59.90
   6  18  23    8.00   26.00
   6  18  24 2381.50   97.40
   6  18  25 2509.30  103.30
   6  19 -26  167.00   63.30
   6  19 -25  155.20   62.20
   6  19 -24  126.00   51.80
   6  19 -23  102.90   49.90
   6  19 -22  262.10   42.90
   6  19 -21   27.00   58.10
   6  19 -20  919.60   98.50
   6  19 -19 1348.70  120.50
   6  19 -18  861.40  103.80
   6  19 -17  805.60   87.30
   6  19 -16  630.60   96.70
   6  19 -15 1636.90  125.00
   6  19 -14 1302.00  113.60
   6  19 -13  291.80   58.00
   6  19 -12  303.50   68.40
   6  19 -11 1577.80  144.50
   6  19 -10  695.10   76.30
   6  19  -9  466.50   68.30
   6  19  -8  924.40   89.70
   6  19  -7  243.90   47.50
   6  19  -6 1254.80  120.10
   6  19  -5  814.40   86.40
   6  19  -4   50.00   16.10
   6  19  -3 2507.50  103.20
   6  19  -2  940.00   48.50
   6  19  -1 1399.40   63.00
   6  19   0 1697.10   75.20
   6  19   1  669.20   29.40
   6  19   2 2025.60   66.00
   6  19   3  586.50   36.20
   6  19   4   -5.40   12.20
   6  19   5 4003.00  116.50
   6  19   610254.10  252.20
   6  19   7 2658.20   87.50
   6  19   813895.90  347.10
   6  19   9 6139.50  176.50
   6  19  10 1841.20   71.60
   6  19  11 1450.30   59.90
   6  19  12  807.00   46.10
   6  19  13 1446.70   65.00
   6  19  14 5106.30  170.10
   6  19  15  120.90   23.90
   6  19  16 1285.10   56.10
   6  19  17  190.20   26.60
   6  19  18  579.30   34.90
   6  19  19  152.70   25.70
   6  19  20   59.10   27.70
   6  19  21  272.70   34.00
   6  19  22  557.00   61.60
   6  19  23  483.10   56.00
   6  20 -25  -12.50   48.10
   6  20 -24 1222.10  140.20
   6  20 -23 2171.40  183.80
   6  20 -22  641.00   87.40
   6  20 -21   71.90   44.10
   6  20 -20   65.10   48.90
   6  20 -19 1922.40  141.80
   6  20 -18  266.90   59.50
   6  20 -17  820.30   91.80
   6  20 -16 2334.10  175.40
   6  20 -15 1692.40  136.90
   6  20 -14 1183.90  121.60
   6  20 -13 4261.10  252.70
   6  20 -12 1945.80  132.70
   6  20 -11  814.10   92.30
   6  20 -10 -132.70   51.70
   6  20  -9   10.50   45.20
   6  20  -8 2372.90  168.00
   6  20  -7   78.70   45.20
   6  20  -6 4114.70  246.30
   6  20  -5  570.60   73.70
   6  20  -4 2969.80  175.60
   6  20  -3 1387.80  128.00
   6  20  -2   80.40   41.60
   6  20  -1 4676.00  258.30
   6  20   0  102.00   22.90
   6  20   1 3923.70  146.30
   6  20   2  718.00   49.10
   6  20   3 1527.10   72.90
   6  20   4  134.70   26.70
   6  20   5 4474.00  165.30
   6  20   6  237.60   35.30
   6  20   7  101.60   30.50
   6  20   8  795.80   51.80
   6  20   9 7702.60  260.50
   6  20  10  419.20   40.70
   6  20  11  151.50   29.30
   6  20  12  424.90   40.30
   6  20  13 4692.30  181.40
   6  20  14   98.40   30.00
   6  20  15  963.00   65.20
   6  20  16 4249.70  166.90
   6  20  17  175.20   35.60
   6  20  18 3394.10  151.50
   6  20  19  176.40   36.80
   6  20  20  789.20   65.00
   6  20  21  109.40   35.40
   6  20  22  149.80   31.40
   6  21 -23   68.00   53.20
   6  21 -22 3782.50  295.80
   6  21 -21  203.30   57.90
   6  21 -20  179.50   64.30
   6  21 -19  808.40   83.20
   6  21 -18  996.60   96.90
   6  21 -17 2145.30  161.20
   6  21 -16   29.50   50.00
   6  21 -15  974.00   90.00
   6  21 -14  186.10   62.80
   6  21 -13  516.80   82.40
   6  21 -12 1363.60  131.50
   6  21 -11  394.40   72.10
   6  21 -10  993.60  107.60
   6  21  -9  783.10   98.40
   6  21  -8 1609.40  142.30
   6  21  -7 2828.50  190.70
   6  21  -6 1684.20  137.30
   6  21  -5  208.40   54.20
   6  21  -4 3134.80  216.00
   6  21  -3  200.10   51.50
   6  21  -2  185.40   53.60
   6  21  -1   43.50   32.80
   6  21   0 1568.10  120.30
   6  21   1   13.20   52.60
   6  21   2 1157.70  102.10
   6  21   3 2503.80  152.10
   6  21   4  243.80   56.10
   6  21   5 1666.20   83.00
   6  21   6 6048.80  223.70
   6  21   7   64.30   26.00
   6  21   8  335.80   55.20
   6  21   9   69.80   29.10
   6  21  10 6145.30  228.70
   6  21  11  361.00   42.60
   6  21  12 2104.80  107.00
   6  21  13  -32.30   31.10
   6  21  14  540.40   50.50
   6  21  15 2103.90  110.70
   6  21  16  -31.10   30.60
   6  21  17 1290.80   88.10
   6  21  18  214.10   39.80
   6  21  19  151.60   32.10
   6  21  20  -14.80   29.10
   6  21  21  251.30   37.30
   6  22 -22 1367.50  131.00
   6  22 -21  169.60   55.40
   6  22 -20  -37.40   56.20
   6  22 -19  151.40   67.10
   6  22 -18   69.40   53.30
   6  22 -17   53.70   53.10
   6  22 -16  504.30   78.80
   6  22 -15 2040.40  139.30
   6  22 -14   98.60   48.00
   6  22 -13 1999.50  163.90
   6  22 -12 2929.50  183.90
   6  22 -11   24.00   40.20
   6  22 -10 1102.40  127.30
   6  22  -9 2922.20  194.90
   6  22  -814845.50  730.50
   6  22  -7   94.70   60.40
   6  22  -620807.90  931.10
   6  22  -5 4708.70  279.50
   6  22  -4 9212.40  473.10
   6  22  -3  185.70   60.30
   6  22  -2  120.90   50.20
   6  22  -1 3444.20  231.20
   6  22   0 1581.30  130.50
   6  22   1  995.40   90.90
   6  22   2  113.80   50.90
   6  22   3  971.30   93.40
   6  22   4  701.10   85.60
   6  22   5   11.20   45.10
   6  22   6 3104.90  218.90
   6  22   7  349.50   55.80
   6  22   8 2222.10  165.10
   6  22   9  597.90   88.90
   6  22  10 3151.70  229.40
   6  22  11   92.70   35.80
   6  22  12   38.40   41.00
   6  22  13   47.20   39.30
   6  22  14  661.60   71.60
   6  22  15  198.60   38.70
   6  22  16  747.60   61.70
   6  22  17 2010.00  111.10
   6  22  18 1129.70   74.70
   6  22  19    7.30   28.10
   6  23 -20  325.70   70.30
   6  23 -19   85.70   41.30
   6  23 -18  226.30   70.00
   6  23 -17  102.80   60.80
   6  23 -16  128.50   71.20
   6  23 -15   34.80   46.70
   6  23 -14 1293.70  118.50
   6  23 -13  912.80   91.90
   6  23 -12  596.70   85.10
   6  23 -11  195.40   55.10
   6  23 -10   18.40   33.50
   6  23  -9   61.70   39.20
   6  23  -8  -77.80   45.50
   6  23  -7  396.70   68.50
   6  23  -6  352.40   72.70
   6  23  -5  122.30   46.20
   6  23  -4  386.70   56.90
   6  23  -3  284.30   62.70
   6  23  -2   52.20   48.70
   6  23  -1 5210.00  295.00
   6  23   0  -74.30   46.30
   6  23   1   54.80   49.80
   6  23   2   33.90   45.60
   6  23   3 2167.40  158.10
   6  23   4   56.10   43.90
   6  23   5  121.90   52.60
   6  23   6  381.40   53.90
   6  23   7 2099.80  146.10
   6  23   8 1218.00   85.70
   6  23   9  840.00   87.30
   6  23  10 4713.50  325.00
   6  23  11  920.90   84.90
   6  23  12 1897.20  164.50
   6  23  13 4613.10  289.60
   6  23  14  696.30   91.70
   6  23  15   30.70   35.30
   6  23  16  -15.20   32.20
   6  23  17  -14.00   40.70
   6  24 -18  185.60   55.60
   6  24 -17  149.70   46.00
   6  24 -16   22.10   57.00
   6  24 -15   76.40   50.10
   6  24 -14  262.10   72.30
   6  24 -13  146.10   55.60
   6  24 -12  118.90   48.10
   6  24 -11   90.70   38.80
   6  24 -10  205.00   52.70
   6  24  -9 2031.50  165.20
   6  24  -8 3262.50  200.00
   6  24  -7  203.00   50.10
   6  24  -6 6494.30  368.10
   6  24  -5 5875.60  305.40
   6  24  -4 3029.80  190.70
   6  24  -3 1772.20  124.80
   6  24  -2  199.80   53.80
   6  24  -1  243.00   51.70
   6  24   0  144.20   58.40
   6  24   1 2461.60  158.10
   6  24   2 1245.20  135.60
   6  24   3  492.70   59.00
   6  24   4    9.20   37.70
   6  24   5   -6.70   37.40
   6  24   6 1259.10   95.40
   6  24   7   -8.40   30.00
   6  24   8  498.40   73.00
   6  24   9  873.00   80.50
   6  24  10  861.70  101.00
   6  24  11   38.80   34.70
   6  24  12 1313.80  127.50
   6  24  13   85.70   38.40
   6  24  14    4.70   40.80
   6  24  15  123.50   49.50
   6  25 -15  120.90   56.10
   6  25 -14  460.00   70.30
   6  25 -13  -14.00   40.40
   6  25 -12   92.00   56.90
   6  25 -11  221.30   65.40
   6  25 -10  865.50  107.10
   6  25  -9   11.20   46.20
   6  25  -8 2606.60  225.30
   6  25  -7 2203.10  151.40
   6  25  -6  -62.30   41.40
   6  25  -5  466.60   73.70
   6  25  -4  603.00   72.10
   6  25  -3  102.30   48.90
   6  25  -2   89.80   49.60
   6  25  -1 2818.10  182.20
   6  25   0  455.50   53.40
   6  25   1 1793.40  144.50
   6  25   2  618.00   73.10
   6  25   3   32.50   32.00
   6  25   4  201.10   52.30
   6  25   5  769.20   86.40
   6  25   6 1238.10  122.20
   6  25   7  882.70   84.10
   6  25   8 2375.40  181.60
   6  25   9  123.00   55.10
   6  25  10   44.40   33.00
   6  25  11  205.60   62.30
   6  25  12  490.20   76.10
   6  26 -12  818.30  101.20
   6  26 -11 1294.10  127.20
   6  26 -10 2319.10  204.60
   6  26  -9 1404.50  142.80
   6  26  -8  662.60  106.90
   6  26  -7  356.00   83.90
   6  26  -6 2556.10  217.80
   6  26  -5   50.50   60.30
   6  26  -4   60.10   39.20
   6  26  -3   83.00   56.70
   6  26  -2  282.60   67.60
   6  26  -1    5.30   48.40
   6  26   0    4.80   47.60
   6  26   1  318.50   68.00
   6  26   2   86.00   44.10
   6  26   3   12.90   46.30
   6  26   4   52.60   43.00
   6  26   5 1397.40  120.80
   6  26   6    4.90   37.60
   6  26   7  249.80   57.60
   6  26   8   68.30   50.80
   6  26   9  669.00   68.40
   6  27  -6  113.30   57.90
   6  27  -5  471.80   86.60
   6  27  -4 1481.30  139.70
   6  27  -3  468.00   63.80
   6  27  -2 1293.60  141.40
   6  27  -1  508.70   68.80
   6  27   0   78.70   57.00
   6  27   1  504.30   83.80
   6  27   2   25.30   42.70
   6  27   3  -21.20   39.80
   7   0 -36   94.60   43.30
   7   0 -35 2153.60  115.60
   7   0 -34  -18.10   31.90
   7   0 -33  113.70   34.80
   7   0 -32   46.70   33.80
   7   0 -31  936.90   53.20
   7   0 -30    4.60   35.70
   7   0 -29  127.90   46.70
   7   0 -28    4.20   28.30
   7   0 -27  763.60   55.60
   7   0 -26  -17.50   29.00
   7   0 -25 2598.40   97.60
   7   0 -24   -2.70   25.40
   7   0 -23   66.60   32.30
   7   0 -22 -129.10   50.80
   7   0 -2110755.50  305.00
   7   0 -20  -92.50   30.60
   7   0 -19 2684.90  106.90
   7   0 -18  -36.20   44.30
   7   0 -1710324.70  290.50
   7   0 -16    9.30   20.10
   7   0 -15 5427.80  177.20
   7   0 -14    7.40   14.50
   7   0 -13 2668.50   98.60
   7   0 -12   16.00   11.60
   7   0 -11 2477.70   73.20
   7   0 -10    0.50    7.80
   7   0  -9 2121.20   64.40
   7   0  -8    1.70    7.00
   7   0  -713837.90  252.30
   7   0  -6    4.80    9.40
   7   0  -4   50.40   11.70
   7   0  -2   43.90    9.90
   7   0   0   39.30    8.20
   7   0   1  102.20    9.40
   7   0   2   14.40    7.30
   7   0   317948.80  331.60
   7   0   4    9.40    7.10
   7   0   520312.90  378.50
   7   0   6    1.70    9.60
   7   0   714006.90  434.70
   7   0   8   -9.70   13.70
   7   0   9  -13.40   13.30
   7   0  10  -10.50   14.10
   7   0  11 7701.70  220.50
   7   0  12  -51.00   17.50
   7   0  1314648.80  418.70
   7   0  14  -18.60   23.00
   7   0  1513512.30  366.50
   7   0  16  -54.80   20.60
   7   0  17  141.90   22.60
   7   0  18  -52.80   18.30
   7   0  19 8035.70  251.50
   7   0  20   -9.60   21.10
   7   0  21   93.90   29.60
   7   0  22   12.40   31.70
   7   0  23  586.50   51.60
   7   0  24  -17.10   30.60
   7   0  25 1209.90   76.60
   7   0  26  -19.50   27.80
   7   0  27  225.40   38.40
   7   0  28   25.10   33.30
   7   0  29 1371.30   94.20
   7   0  30   18.80   37.50
   7   0  31   32.60   32.60
   7   0  32   27.00   31.80
   7   1 -36  145.00   25.00
   7   1 -35  209.60   28.00
   7   1 -34  796.60   39.10
   7   1 -33  -13.50   19.50
   7   1 -32   20.40   21.40
   7   1 -31   77.60   24.00
   7   1 -30  264.40   29.60
   7   1 -29  482.20   32.70
   7   1 -28  358.30   30.20
   7   1 -27 1055.00   44.20
   7   1 -26 1407.30   51.60
   7   1 -25 1595.50   50.20
   7   1 -24  442.00   26.50
   7   1 -23 4026.40   99.50
   7   1 -22 1680.10   54.60
   7   1 -2166794.50 2524.40
   7   1 -1944875.70  925.60
   7   1 -18 2965.70   70.40
   7   1 -17 2758.70   72.30
   7   1 -16 5694.80  120.80
   7   1 -15 3380.60   79.90
   7   1 -14 1957.10   52.50
   7   1 -1315837.70  296.40
   7   1 -12 4135.20   80.50
   7   1 -11 3922.80   79.40
   7   1 -10 3227.00   60.00
   7   1  -9 2064.10   41.90
   7   1  -8 7590.70  108.40
   7   1  -7 2002.80   36.60
   7   1  -6   98.00    8.10
   7   1  -5 1943.10   33.70
   7   1  -434998.10  553.40
   7   1  -340911.90  958.30
   7   1  -228731.70  410.90
   7   1  -126303.70  380.00
   7   1   0  105.60    6.30
   7   1   1 5675.90   80.10
   7   1   2 5701.20   81.40
   7   1   3 1480.30   26.20
   7   1   4 2521.20   40.60
   7   1   5   30.50    6.50
   7   1   6  451.30   18.20
   7   1   718726.70  380.30
   7   1   8  150.00   13.10
   7   1   912888.50  265.10
   7   1  10 3274.40   76.10
   7   1  11   12.90   11.90
   7   1  12 1611.90   48.90
   7   1  1328010.70  544.60
   7   1  14 3848.80   92.40
   7   1  1532258.10  564.10
   7   1  16 5659.90  122.70
   7   1  17  152.00   16.90
   7   1  18 5594.80  129.30
   7   1  19 1438.70   44.30
   7   1  20 4755.70  117.40
   7   1  21  755.40   35.50
   7   1  22 1143.30   47.80
   7   1  23 5401.50  143.60
   7   1  24  851.70   43.50
   7   1  25  826.50   44.20
   7   1  26  122.10   24.50
   7   1  27  158.00   26.10
   7   1  28 1441.30   63.30
   7   1  29  695.20   47.20
   7   1  30 1188.80   59.90
   7   1  31 1145.00   61.40
   7   1  32  149.50   29.60
   7   2 -36  292.50   35.10
   7   2 -35   74.60   24.70
   7   2 -34  710.20   41.20
   7   2 -33 1861.60   66.20
   7   2 -32  647.60   43.40
   7   2 -31  720.20   40.20
   7   2 -30  665.80   39.90
   7   2 -29  418.00   33.00
   7   2 -28   30.00   22.20
   7   2 -27   68.10   28.50
   7   2 -26 1801.50   58.30
   7   2 -25   65.10   20.00
   7   2 -24 5425.10  121.90
   7   2 -23 3059.30   78.30
   7   2 -22  900.40   35.90
   7   2 -21 1176.20   40.10
   7   2 -20 4522.90  107.80
   7   2 -19  363.30   23.50
   7   2 -18 2281.20   58.40
   7   2 -17  241.40   18.60
   7   2 -16  664.70   26.50
   7   2 -15  372.40   20.00
   7   2 -14 8381.70  145.40
   7   2 -13 1910.90   42.20
   7   2 -12 8658.20  144.80
   7   2 -11   55.10    8.30
   7   2 -10 1283.60   28.50
   7   2  -9  784.10   18.10
   7   2  -8 3143.90   53.40
   7   2  -7 3485.00   54.20
   7   2  -6  321.60    9.50
   7   2  -5 2130.10   33.90
   7   2  -4  810.40   15.80
   7   2  -336066.10  561.90
   7   2  -2  251.20    8.20
   7   2  -1 2055.60   33.40
   7   2   0 2026.20   33.80
   7   2   1 2176.80   34.70
   7   2   213396.30  174.30
   7   2   3   49.40    5.30
   7   2   4 7428.30  102.00
   7   2   5 6719.70  104.70
   7   2   629796.30  477.90
   7   2   7 2017.00   48.30
   7   2   819432.40  372.90
   7   2   9 5310.10  118.70
   7   2  10  368.00   20.60
   7   2  11 8121.90  175.80
   7   2  12 8009.60  208.90
   7   2  13 4454.00  116.80
   7   2  1426411.80  521.60
   7   2  1533932.20  640.90
   7   2  16 2504.90   68.70
   7   2  17 4913.60  119.00
   7   2  18 6284.20  151.20
   7   2  19  494.50   27.80
   7   2  20  236.70   25.10
   7   2  21  770.70   38.40
   7   2  22 1579.80   61.30
   7   2  23 2496.50   83.40
   7   2  24  326.30   28.80
   7   2  25  101.40   26.00
   7   2  26  -59.50   20.20
   7   2  27  331.30   29.00
   7   2  28 3436.60  113.50
   7   2  29   95.80   30.20
   7   2  30  618.20   43.60
   7   2  31  331.90   33.80
   7   2  32 2879.60  105.80
   7   3 -36  -20.40   27.80
   7   3 -35  873.20   49.10
   7   3 -34  299.50   32.20
   7   3 -33  497.10   35.40
   7   3 -32  100.00   24.60
   7   3 -31    7.50   23.40
   7   3 -30   86.40   22.60
   7   3 -29   47.10   24.70
   7   3 -28  654.30   33.10
   7   3 -27   12.80   22.30
   7   3 -26 3957.50   99.90
   7   3 -25   19.90   21.60
   7   3 -24  100.10   20.50
   7   3 -23 1100.80   39.50
   7   3 -22 2449.70   67.80
   7   3 -21 3867.40   87.80
   7   3 -20   14.00   15.00
   7   3 -19  810.50   26.80
   7   3 -18 2444.30   60.30
   7   3 -17 4973.40  109.60
   7   3 -16  811.00   31.70
   7   3 -15 4992.60  108.40
   7   3 -14 2279.00   45.00
   7   3 -13   88.50    9.90
   7   3 -1223532.80  361.80
   7   3 -11 2329.30   47.60
   7   3 -10 6265.60  115.30
   7   3  -9 2531.50   46.10
   7   3  -8 5647.00   87.70
   7   3  -7 2035.20   35.00
   7   3  -6 6803.70   94.60
   7   3  -5  151.00    6.80
   7   3  -4 7375.60   99.40
   7   3  -3 5424.40   77.40
   7   3  -2 2990.70   44.00
   7   3  -1 4510.60   65.70
   7   3   0  606.10   13.30
   7   3   1  822.20   17.40
   7   3   2  169.10    7.50
   7   3   3 2552.20   41.80
   7   3   4  560.00   14.90
   7   3   5  319.30   12.20
   7   3   6 2357.00   46.30
   7   3   7  749.60   23.40
   7   3   8 1868.30   52.10
   7   3   911619.30  216.00
   7   3  10   77.40   14.00
   7   3  11 7235.40  154.40
   7   3  12   80.20   15.20
   7   3  13 2156.50   64.60
   7   3  14 1887.70   55.90
   7   3  15  406.20   24.30
   7   3  16   91.70   18.60
   7   3  17 2055.00   61.00
   7   3  18 5349.20  139.50
   7   3  19 8613.60  207.80
   7   3  20 7874.60  199.20
   7   3  21   16.70   18.80
   7   3  22  543.50   37.10
   7   3  23 5783.10  157.50
   7   3  24 1326.10   52.80
   7   3  25    1.00   22.40
   7   3  26  -29.60   21.10
   7   3  2715224.30  365.40
   7   3  28 2672.20   94.50
   7   3  29 8065.80  234.00
   7   3  30  387.30   33.40
   7   3  31  738.50   46.40
   7   3  32   15.40   24.20
   7   4 -36   -0.80   25.40
   7   4 -35 2231.10   80.90
   7   4 -34  742.40   50.70
   7   4 -33 5875.60  154.40
   7   4 -32   11.60   22.50
   7   4 -31  970.50   46.50
   7   4 -30 1290.10   51.00
   7   4 -29   68.80   20.40
   7   4 -28   20.30   20.20
   7   4 -27   95.80   22.30
   7   4 -26   19.20   19.40
   7   4 -25   47.80   19.30
   7   4 -24  690.30   33.00
   7   4 -23   -4.50   17.20
   7   4 -22  996.80   35.50
   7   4 -21  947.00   35.50
   7   4 -20 4230.50   89.00
   7   4 -19  142.50   15.10
   7   4 -18 2065.50   53.70
   7   4 -17  275.20   20.10
   7   4 -16 4228.80   97.90
   7   4 -1513817.10  246.60
   7   4 -14  513.40   18.60
   7   4 -13 3409.30   65.00
   7   4 -12  848.20   22.60
   7   4 -11   27.00    7.70
   7   4 -10 2368.00   50.10
   7   4  -9 9802.30  159.50
   7   4  -8 2378.60   45.40
   7   4  -7 4178.00   68.30
   7   4  -6 8971.60  121.40
   7   4  -5  641.60   13.80
   7   4  -414902.90  205.10
   7   4  -3   95.90    5.70
   7   4  -2 4032.70   58.50
   7   4  -1 2550.80   38.40
   7   4   0 1207.50   21.50
   7   4   1 2171.00   35.50
   7   4   2 5687.00   81.30
   7   4   3 9224.40  137.40
   7   4   4 1942.60   40.10
   7   4   5 1470.90   31.60
   7   4   615714.90  250.10
   7   4   7 2751.00   59.50
   7   4   8  682.10   24.70
   7   4   9 2275.70   54.20
   7   4  1010867.20  236.80
   7   4  1123344.30  444.70
   7   4  12 2287.70   63.50
   7   4  13   71.10   14.50
   7   4  14 1197.90   40.60
   7   4  15 5488.40  130.60
   7   4  16 1569.30   52.00
   7   4  17   12.30   14.00
   7   4  18  882.10   36.50
   7   4  19   48.90   19.80
   7   4  20 2892.50   82.90
   7   4  21   79.10   21.50
   7   4  22  720.80   36.90
   7   4  23  -23.80   18.60
   7   4  24    0.00   17.90
   7   4  25 1937.40   68.50
   7   4  26 1834.20   72.60
   7   4  27 6559.30  181.10
   7   4  28 1625.30   67.10
   7   4  29 1805.10   77.80
   7   4  30   16.20   27.30
   7   4  31   44.40   21.00
   7   4  32  -13.40   23.30
   7   5 -36   94.60   31.90
   7   5 -35   81.80   22.60
   7   5 -34   90.90   28.10
   7   5 -33 1995.10   72.00
   7   5 -32   15.70   25.00
   7   5 -31 1218.00   53.20
   7   5 -30   57.60   23.10
   7   5 -29  264.60   26.00
   7   5 -28  529.20   34.30
   7   5 -27 2048.90   65.20
   7   5 -26 2463.70   71.30
   7   5 -25  725.40   34.90
   7   5 -24   -7.60   16.80
   7   5 -23  255.60   22.70
   7   5 -22 3292.90   83.30
   7   5 -21 5970.40  123.20
   7   5 -20  187.60   18.90
   7   5 -19 6187.20  133.50
   7   5 -18 2792.40   70.40
   7   5 -17 7392.00  158.50
   7   5 -16 2351.40   64.30
   7   5 -1515432.00  280.60
   7   5 -14 1822.00   41.50
   7   5 -13   47.00    8.60
   7   5 -12 2530.30   53.60
   7   5 -11  781.50   23.40
   7   5 -10  144.60    9.70
   7   5  -9 3525.70   63.70
   7   5  -8 8833.30  140.80
   7   5  -7 1549.80   29.90
   7   5  -6 4097.20   62.80
   7   5  -5 4547.50   83.50
   7   5  -4 5299.50   91.10
   7   5  -3 5965.60   81.70
   7   5  -2 7416.80  102.70
   7   5  -1 6107.30   85.50
   7   5   0 1232.90   22.60
   7   5   1 6434.20   99.00
   7   5   2 9053.80  134.60
   7   5   324561.30  358.50
   7   5   4 4329.90   74.60
   7   5   5 1916.20   38.90
   7   5   6  930.90   23.60
   7   5   7 1060.70   31.00
   7   5   8 4392.90  102.90
   7   5  10  685.40   31.00
   7   5  1136317.80  658.40
   7   5  12 3787.20   96.60
   7   5  13  120.60   15.90
   7   5  14  242.50   19.50
   7   5  15 2326.40   60.90
   7   5  16  110.70   16.40
   7   5  17 9461.90  208.40
   7   5  18  770.00   33.70
   7   5  19 4336.10  106.90
   7   5  20 2216.30   66.90
   7   5  21  299.50   25.70
   7   5  22  982.90   43.40
   7   5  23  837.70   39.00
   7   5  24 1082.40   49.70
   7   5  25    2.70   20.70
   7   5  26  316.50   30.70
   7   5  27 3281.10  103.30
   7   5  28  462.80   37.80
   7   5  29 5241.70  160.40
   7   5  30  222.80   32.10
   7   5  31  188.50   26.20
   7   5  32   14.30   20.80
   7   6 -35  739.40   41.20
   7   6 -34   13.00   26.40
   7   6 -33 4089.30  117.90
   7   6 -32  899.40   46.80
   7   6 -31 1222.50   53.60
   7   6 -30 1145.80   48.30
   7   6 -29   66.70   23.30
   7   6 -28  412.40   30.20
   7   6 -27  909.50   39.80
   7   6 -26  235.80   25.50
   7   6 -25  839.30   36.10
   7   6 -24 1137.90   42.70
   7   6 -23 1059.10   50.70
   7   6 -22   91.50   20.20
   7   6 -21   34.10   17.50
   7   6 -20  221.50   17.80
   7   6 -19  250.50   17.90
   7   6 -18   60.40   15.10
   7   6 -1713840.10  269.60
   7   6 -16  489.10   27.70
   7   6 -1540852.00  717.40
   7   6 -1412462.00  214.60
   7   6 -13 3429.90   64.80
   7   6 -12 1185.40   27.90
   7   6 -11  141.60    9.30
   7   6 -1015631.50  227.00
   7   6  -948750.90  826.90
   7   6  -811320.00  166.00
   7   6  -741705.70  727.00
   7   6  -6 3089.20   70.90
   7   6  -5  756.80   23.10
   7   6  -4   20.20    8.30
   7   6  -316373.40  283.50
   7   6  -2  944.30   18.50
   7   6  -1 9090.10  131.90
   7   6   0  800.50   17.80
   7   6   1  447.00   12.40
   7   6   2   67.80    6.50
   7   6   3 3576.50   61.90
   7   6   4  653.40   15.10
   7   6   5 3693.40   65.40
   7   6   6 2821.40   60.10
   7   6   7   26.10    7.70
   7   6   8   42.70   12.80
   7   6   9    6.30   13.40
   7   6  10   78.60   16.20
   7   6  11 4290.80  104.10
   7   6  12 5391.80  136.30
   7   6  13   23.40   13.30
   7   6  14 1938.40   54.70
   7   6  15   27.60   14.50
   7   6  16   -8.40   12.60
   7   6  17 3440.30   85.60
   7   6  18  728.50   33.10
   7   6  19  472.10   28.20
   7   6  20  163.00   22.10
   7   6  21 3564.00   98.70
   7   6  22  892.50   38.40
   7   6  23  162.00   21.90
   7   6  24 3506.30  100.90
   7   6  25 3187.80   99.20
   7   6  26 2438.40   86.50
   7   6  27 7233.70  204.50
   7   6  28   49.10   24.80
   7   6  29  155.10   27.00
   7   6  30  119.80   25.60
   7   6  31  569.70   38.10
   7   6  32   83.00   44.50
   7   7 -35  -12.40   21.70
   7   7 -34  280.60   32.40
   7   7 -33  434.60   37.60
   7   7 -32  565.30   38.70
   7   7 -31  -11.50   22.70
   7   7 -30  304.60   32.60
   7   7 -29  794.50   41.50
   7   7 -28  -27.40   21.70
   7   7 -27   -1.00   18.90
   7   7 -26  195.10   23.90
   7   7 -25  892.60   40.50
   7   7 -24 1143.70   42.90
   7   7 -23  298.10   26.70
   7   7 -22 4556.20  114.20
   7   7 -21 2892.90   75.90
   7   7 -20 2460.20   61.80
   7   7 -19 1876.10   50.40
   7   7 -18  561.30   24.50
   7   7 -17 8480.20  165.30
   7   7 -16 6978.90  125.70
   7   7 -1520093.80  324.40
   7   7 -1414982.70  247.10
   7   7 -13 1656.70   36.10
   7   7 -12 1428.50   32.70
   7   7 -11   15.40    6.70
   7   7 -10 1064.10   21.50
   7   7  -9 9324.90  134.30
   7   7  -8  290.40   12.50
   7   7  -716799.00  299.90
   7   7  -6 2632.40   59.00
   7   7  -5   40.00    9.80
   7   7  -4 6256.10  115.80
   7   7  -3 2554.90   55.70
   7   7  -2 1309.30   22.40
   7   7  -1 3181.30   49.50
   7   7   0  683.60   14.90
   7   7   1  363.90   11.20
   7   7   2  579.60   15.30
   7   7   3  742.90   17.40
   7   7   411589.80  178.40
   7   7   5 5756.80   95.30
   7   7   6  271.40   11.00
   7   7   7 2214.60   44.90
   7   7   849347.40 1002.80
   7   7   957500.60 2152.30
   7   7  1027504.10  735.10
   7   7  1123556.70  452.40
   7   7  12 3104.40   80.70
   7   7  13    3.80   12.10
   7   7  14 1496.10   45.40
   7   7  15   62.10   16.70
   7   7  16 8958.70  182.10
   7   7  17  143.30   16.50
   7   7  18  -12.10   16.00
   7   7  19  577.30   31.80
   7   7  20 4874.40  125.70
   7   7  21  202.20   23.40
   7   7  22 1496.60   54.40
   7   7  23  443.10   32.20
   7   7  24  220.90   26.90
   7   7  25 1363.90   56.40
   7   7  26 1120.40   53.20
   7   7  27 4314.90  130.40
   7   7  28  109.60   27.30
   7   7  29 1703.30   72.00
   7   7  30 4479.00  147.60
   7   7  31    6.80   24.30
   7   7  32  749.10   82.60
   7   8 -35 1298.40   56.30
   7   8 -34   60.70   25.60
   7   8 -33 2437.90   88.10
   7   8 -32 1546.30   59.20
   7   8 -31 1031.40   45.20
   7   8 -30   78.00   22.20
   7   8 -29   40.70   21.30
   7   8 -28  525.60   29.70
   7   8 -27   79.80   20.40
   7   8 -26 1635.60   54.40
   7   8 -25  791.70   39.70
   7   8 -24 1388.80   47.10
   7   8 -23 6219.20  143.90
   7   8 -22   67.60   20.60
   7   8 -21 6631.90  140.30
   7   8 -20 1842.60   49.70
   7   8 -19  283.30   17.50
   7   8 -18 1468.40   40.10
   7   8 -17 2729.40   68.20
   7   8 -16  583.20   20.80
   7   8 -15 2671.70   54.00
   7   8 -14 7920.20  137.50
   7   8 -13 1895.40   40.70
   7   8 -12 9359.60  159.80
   7   8 -11   37.70    7.30
   7   8 -10 1762.70   32.30
   7   8  -910564.10  151.80
   7   8  -8  218.90    8.60
   7   8  -7 6438.80  126.30
   7   8  -6 1278.00   35.60
   7   8  -5   42.20   10.00
   7   8  -4 7238.40  151.10
   7   8  -3  415.90   17.70
   7   8  -2  165.30    5.70
   7   8  -1   73.30    5.60
   7   8   0 1148.20   22.90
   7   8   1   58.50    6.20
   7   8   2 6118.10  102.10
   7   8   3   72.30    7.00
   7   8   4 4036.30   70.90
   7   8   5    4.60    7.00
   7   8   619381.00  293.50
   7   8   7 2825.10   59.00
   7   8   8  569.70   22.30
   7   8   932757.70  583.80
   7   8  10 4702.90  105.40
   7   8  1130367.40  563.20
   7   8  12 4817.90  114.20
   7   8  13  485.50   26.40
   7   8  14 1507.40   42.20
   7   8  1518005.70  341.70
   7   8  16  903.90   35.10
   7   8  1711099.70  236.60
   7   8  18  -23.20   17.50
   7   8  19 1278.20   44.50
   7   8  20  442.50   31.50
   7   8  21 2129.90   65.40
   7   8  22   -1.90   17.30
   7   8  23 1022.30   40.20
   7   8  24  696.20   40.80
   7   8  25  719.70   41.40
   7   8  26 5625.40  153.70
   7   8  27 2786.60   97.30
   7   8  28 2593.70   94.10
   7   8  29 2288.60   89.00
   7   8  30   39.30   26.20
   7   8  31 1768.10   76.90
   7   9 -34  158.20   29.30
   7   9 -33 1306.90   54.60
   7   9 -32  162.40   29.30
   7   9 -31  435.80   31.10
   7   9 -30  791.50   39.50
   7   9 -29  571.10   34.00
   7   9 -28  176.70   24.30
   7   9 -27  613.40   35.30
   7   9 -26  788.10   40.10
   7   9 -25   85.90   20.20
   7   9 -24  447.90   29.80
   7   9 -23  376.40   25.30
   7   9 -22 1767.40   53.70
   7   9 -21 2935.00   73.60
   7   9 -20  -18.30   14.20
   7   9 -19  520.60   24.40
   7   9 -18 8778.30  171.20
   7   9 -17  190.20   20.40
   7   9 -16 6891.40  126.40
   7   9 -15  559.80   19.30
   7   9 -14  333.30   15.20
   7   9 -13 5678.30  104.80
   7   9 -1212868.50  217.50
   7   9 -11 1103.60   28.40
   7   9 -10 3438.30   57.70
   7   9  -9  478.90   12.40
   7   9  -8 1143.60   25.50
   7   9  -7 8713.00  175.60
   7   9  -6 3764.50   84.70
   7   9  -517677.20  341.60
   7   9  -4 2018.80   53.10
   7   9  -3 7575.70  158.10
   7   9  -2 6931.70  108.40
   7   9  -153261.80 1325.50
   7   9   0 1531.00   30.20
   7   9   1 6087.70  110.20
   7   9   2   30.80    5.80
   7   9   3 1033.80   22.00
   7   9   411991.90  182.90
   7   9   5  610.70   16.60
   7   9   6 3031.70   58.30
   7   9   7 7437.40  136.70
   7   9   8 7993.10  145.70
   7   9   9 1394.70   41.50
   7   9  10 1153.00   37.00
   7   9  11  146.20   16.50
   7   9  12 1106.40   39.00
   7   9  13 1116.20   41.50
   7   9  14  270.20   21.90
   7   9  15 1951.70   55.90
   7   9  16   -5.70   16.30
   7   9  17 2077.60   56.60
   7   9  18 2629.60   78.90
   7   9  19 1094.00   43.30
   7   9  20 9842.50  233.50
   7   9  21 1097.00   49.70
   7   9  22 4362.10  123.70
   7   9  23  534.70   29.80
   7   9  24  -37.00   21.70
   7   9  25 1542.50   57.30
   7   9  26 1714.00   72.20
   7   9  27 9700.40  250.10
   7   9  28  454.10   32.40
   7   9  29 1204.40   61.60
   7   9  30  119.20   27.90
   7   9  31 1426.40   66.00
   7  10 -34 1113.90   73.40
   7  10 -33  111.80   27.60
   7  10 -32  477.10   42.40
   7  10 -31   76.00   22.60
   7  10 -30  120.90   22.00
   7  10 -29  232.20   26.30
   7  10 -28 1028.90   45.60
   7  10 -27 1481.40   52.90
   7  10 -26 1406.90   53.20
   7  10 -25  252.40   21.60
   7  10 -24   -9.10   17.60
   7  10 -23 6420.30  153.80
   7  10 -22 1565.30   50.40
   7  10 -21 1167.70   45.10
   7  10 -20 3812.10   91.00
   7  10 -19  283.80   21.60
   7  10 -18 1940.40   49.80
   7  10 -17   31.60   16.40
   7  10 -16    7.20    9.70
   7  10 -15 2737.70   57.80
   7  10 -14 7550.60  136.00
   7  10 -13  378.80   16.10
   7  10 -12 3445.40   71.40
   7  10 -11 2464.80   51.70
   7  10 -10 1195.50   25.50
   7  10  -9  690.50   15.70
   7  10  -8 3782.30   60.30
   7  10  -7  893.10   26.80
   7  10  -614924.50  275.00
   7  10  -5 9461.80  183.60
   7  10  -4 8509.00  166.00
   7  10  -335482.90  611.20
   7  10  -2 6772.70  102.50
   7  10  -1  849.30   18.50
   7  10   025919.30  361.70
   7  10   1 1610.70   31.70
   7  10   218837.20  276.70
   7  10   3 1078.10   22.90
   7  10   4 4353.50   72.90
   7  10   5 4339.30   76.70
   7  10   6  785.80   21.30
   7  10   7 1036.00   30.50
   7  10   8  176.90   11.20
   7  10   9 3926.90   92.40
   7  10  10  638.40   23.70
   7  10  11  212.30   17.30
   7  10  12  819.10   30.40
   7  10  13 3001.70   73.80
   7  10  1410931.90  236.80
   7  10  1529283.50  631.80
   7  10  1625731.00  556.20
   7  10  1720263.10  400.10
   7  10  18 2641.70   79.00
   7  10  19   59.50   19.80
   7  10  20 2089.10   69.60
   7  10  21  -43.00   18.60
   7  10  22 1109.50   50.70
   7  10  23  314.00   26.10
   7  10  24  -47.00   19.40
   7  10  25   41.10   22.10
   7  10  26  144.00   26.30
   7  10  27  101.00   24.70
   7  10  28  651.10   39.30
   7  10  29   -4.70   24.40
   7  10  30  113.90   23.60
   7  11 -33    8.30   21.50
   7  11 -32  491.50   47.40
   7  11 -31   93.80   27.00
   7  11 -30  363.70   35.00
   7  11 -29   37.60   21.10
   7  11 -28  402.80   30.50
   7  11 -27  295.90   24.60
   7  11 -26 2328.60   72.30
   7  11 -25   72.50   21.40
   7  11 -24 1950.00   61.50
   7  11 -23 4649.00  117.00
   7  11 -2213984.10  293.40
   7  11 -2124870.90  481.30
   7  11 -20 2083.10   60.90
   7  11 -1911123.80  227.80
   7  11 -18 4533.70  107.10
   7  11 -17 2436.90   67.60
   7  11 -16 9017.10  187.00
   7  11 -15   38.10    9.80
   7  11 -14 1045.30   28.00
   7  11 -13 4578.70   90.00
   7  11 -12 1049.90   28.00
   7  11 -11 2587.70   48.00
   7  11 -10   25.70    5.70
   7  11  -9 3975.40   64.70
   7  11  -8  246.70    7.90
   7  11  -7 2877.50   63.90
   7  11  -6   50.10    9.70
   7  11  -5  244.20   13.90
   7  11  -4 3371.40   53.10
   7  11  -312242.90  192.30
   7  11  -234413.00  514.40
   7  11  -116112.90  252.40
   7  11   017140.70  244.60
   7  11   1  415.10   14.90
   7  11   2 3446.60   58.70
   7  11   3   16.60    6.40
   7  11   4 7150.30  114.60
   7  11   5   54.20    7.50
   7  11   6   42.00    8.40
   7  11   7 6421.80  126.40
   7  11   8   31.00    9.30
   7  11   9 4823.00  121.40
   7  11  10 6426.80  138.50
   7  11  11  749.30   28.10
   7  11  12 4449.70  103.90
   7  11  13 9228.50  183.40
   7  11  14 1903.90   56.60
   7  11  1518257.30  362.70
   7  11  16 7268.30  165.20
   7  11  17   93.40   18.10
   7  11  18  725.10   34.10
   7  11  19  622.50   31.00
   7  11  20  125.70   20.20
   7  11  21  137.30   22.00
   7  11  22   62.40   21.00
   7  11  23 2081.40   75.50
   7  11  24  116.80   23.50
   7  11  25  375.90   29.30
   7  11  26   27.10   19.40
   7  11  27   17.70   20.40
   7  11  28  552.10   38.90
   7  11  29  436.60   35.90
   7  11  30  -26.50   18.00
   7  12 -33  183.40   35.20
   7  12 -32   32.30   27.20
   7  12 -31 1165.80   59.60
   7  12 -30  618.10   44.90
   7  12 -29  -11.80   20.90
   7  12 -28   37.20   26.50
   7  12 -27   19.60   27.40
   7  12 -26  247.50   23.50
   7  12 -25   41.80   19.00
   7  12 -24 2793.90   80.30
   7  12 -23  -19.90   17.40
   7  12 -22   -8.20   17.70
   7  12 -21 5226.50  131.10
   7  12 -20  163.30   21.70
   7  12 -19 1970.70   59.50
   7  12 -18 1021.00   38.60
   7  12 -17 1438.30   46.20
   7  12 -16  475.80   23.40
   7  12 -15 1497.70   42.80
   7  12 -14 1352.20   33.20
   7  12 -13  492.00   17.00
   7  12 -12  136.40    9.90
   7  12 -11   50.40    6.90
   7  12 -10 3171.50   54.40
   7  12  -9 1082.30   22.20
   7  12  -8 1906.00   38.50
   7  12  -7  260.70    7.90
   7  12  -611708.20  167.50
   7  12  -527155.50  367.60
   7  12  -4 9500.70  138.60
   7  12  -387436.90 2977.70
   7  12  -2 2670.70   44.10
   7  12  -126826.20  372.20
   7  12   0 2092.00   38.60
   7  12   1 1359.50   27.50
   7  12   2 1910.40   36.10
   7  12   3  663.60   16.20
   7  12   4 1163.00   24.60
   7  12   5 3446.00   63.20
   7  12   6 4171.70   78.20
   7  12   7 1725.70   40.90
   7  12   8 2592.90   63.70
   7  12   9 1384.50   36.30
   7  12  10 3462.70   86.00
   7  12  11 3773.10   87.40
   7  12  12 5093.20  113.20
   7  12  13 1432.10   43.00
   7  12  14  379.50   21.50
   7  12  15  662.90   29.40
   7  12  16 5122.80  130.60
   7  12  17 1163.80   46.70
   7  12  18 5126.70  132.70
   7  12  19 1025.10   47.00
   7  12  20 2160.50   74.90
   7  12  21 2889.10   92.70
   7  12  22 3056.30   99.00
   7  12  23  322.60   29.80
   7  12  24   32.40   23.40
   7  12  25 3614.20  105.70
   7  12  26  111.40   25.60
   7  12  27  776.80   46.00
   7  12  28  114.40   24.40
   7  12  29  424.60   29.60
   7  13 -32   49.90   27.00
   7  13 -31  236.50   33.80
   7  13 -30   37.80   27.10
   7  13 -29   30.60   24.90
   7  13 -28  405.00   37.60
   7  13 -27  967.90   57.10
   7  13 -26 1656.30   69.90
   7  13 -25  900.70   48.20
   7  13 -24  531.70   32.00
   7  13 -23 3661.30   98.00
   7  13 -22 2067.70   63.20
   7  13 -21 6945.40  164.80
   7  13 -20 2191.40   67.90
   7  13 -19 1859.00   56.50
   7  13 -18   97.10   18.80
   7  13 -17   32.00   15.30
   7  13 -16   80.60   14.10
   7  13 -15 2133.20   53.90
   7  13 -14  250.10   15.20
   7  13 -13 1249.00   36.90
   7  13 -12 1890.70   45.40
   7  13 -11   69.30    6.80
   7  13 -10  500.60   13.00
   7  13  -9  306.80    9.90
   7  13  -8 5799.90   99.70
   7  13  -7  233.50    7.80
   7  13  -6 3544.70   55.70
   7  13  -5 3386.80   53.80
   7  13  -410092.10  143.80
   7  13  -3 6969.50  102.90
   7  13  -2   15.80    8.10
   7  13  -1 1237.20   32.80
   7  13   018412.50  258.10
   7  13   1  186.10    7.80
   7  13   2  243.40   10.00
   7  13   3 1716.80   35.60
   7  13   4 2137.40   41.20
   7  13   5  490.30   17.30
   7  13   6  812.00   23.00
   7  13   7 2023.10   47.60
   7  13   8  848.40   26.50
   7  13   916995.40  329.80
   7  13  10  320.40   19.20
   7  13  11 2217.60   61.50
   7  13  12 2738.00   69.80
   7  13  13 1113.10   36.80
   7  13  14 2731.20   75.70
   7  13  15 4924.60  121.40
   7  13  16 1165.10   42.30
   7  13  17  787.50   35.90
   7  13  18 2051.40   66.80
   7  13  19   63.00   21.60
   7  13  20  722.50   35.60
   7  13  21   -1.40   19.40
   7  13  22   21.70   19.80
   7  13  23  560.70   35.50
   7  13  24 2132.00   74.40
   7  13  25  293.10   28.40
   7  13  26 1560.70   67.40
   7  13  27   89.40   23.90
   7  13  28 1228.30   61.50
   7  14 -31  112.40   32.90
   7  14 -30  220.60   32.50
   7  14 -29   61.20   29.90
   7  14 -28 1138.40   57.40
   7  14 -27   61.80   27.30
   7  14 -26   78.30   26.10
   7  14 -25  530.30   35.50
   7  14 -24 3107.00  106.50
   7  14 -23  125.50   26.50
   7  14 -22   87.90   25.40
   7  14 -21  205.50   27.90
   7  14 -20  783.70   35.60
   7  14 -19   65.80   18.00
   7  14 -18 4212.30  105.40
   7  14 -17   91.70   16.10
   7  14 -16 1219.50   38.90
   7  14 -15 4647.20  105.40
   7  14 -14  299.40   18.10
   7  14 -13 4813.80  107.40
   7  14 -12 1235.40   35.60
   7  14 -11 1161.60   34.90
   7  14 -10 1026.90   31.40
   7  14  -9  848.20   18.70
   7  14  -8   65.20    5.70
   7  14  -7  305.70    9.20
   7  14  -6 5288.30   80.20
   7  14  -5   44.20    4.60
   7  14  -4 4148.10   81.80
   7  14  -3  200.00   10.70
   7  14  -2   53.90    8.30
   7  14  -1  655.30   20.80
   7  14   0  745.10   23.30
   7  14   1 4651.20   99.60
   7  14   2  137.80   12.10
   7  14   3 2593.90   47.10
   7  14   4 6451.30  122.60
   7  14   5   25.80    7.40
   7  14   6  247.90   16.50
   7  14   7 3219.20   81.90
   7  14   8 9942.70  203.80
   7  14   9  534.10   26.00
   7  14  10  883.20   33.60
   7  14  11 2296.00   63.80
   7  14  12  474.80   25.20
   7  14  13  125.20   16.30
   7  14  14 1844.80   59.70
   7  14  15  188.00   21.30
   7  14  16 2432.00   71.70
   7  14  17  662.00   33.90
   7  14  18 5665.80  142.00
   7  14  19 2603.70   79.20
   7  14  20 1637.20   62.30
   7  14  21 2907.90   92.50
   7  14  22 4512.30  128.20
   7  14  23  133.50   21.80
   7  14  24  282.60   24.30
   7  14  25  784.80   50.70
   7  14  26  339.80   43.00
   7  14  27 2272.00  104.00
   7  14  28  128.00   23.50
   7  15 -30   42.10   25.60
   7  15 -29 1396.00   70.80
   7  15 -28  168.10   33.10
   7  15 -27  642.20   45.30
   7  15 -26    2.00   22.80
   7  15 -25 1246.80   60.90
   7  15 -24 1090.60   55.10
   7  15 -23 2326.10   87.90
   7  15 -22 2502.30   97.00
   7  15 -21  101.60   24.30
   7  15 -20  106.50   24.40
   7  15 -19  212.90   29.00
   7  15 -18  633.00   36.30
   7  15 -17  802.40   43.40
   7  15 -16  395.20   22.10
   7  15 -15   -2.70   11.70
   7  15 -14  423.50   21.90
   7  15 -13  100.60   12.30
   7  15 -12  301.00   16.70
   7  15 -11 7932.00  160.40
   7  15 -10  109.90   11.60
   7  15  -9 7515.00  150.10
   7  15  -8  266.20   10.70
   7  15  -7  301.10   10.50
   7  15  -6 2519.50   41.00
   7  15  -5   72.10    8.40
   7  15  -4 3947.30   82.90
   7  15  -3 1290.00   32.00
   7  15  -214724.90  263.00
   7  15  -1  258.50   13.70
   7  15   012039.40  230.60
   7  15   1    6.40    9.50
   7  15   2 1757.00   47.00
   7  15   3 7568.30  157.90
   7  15   4 5601.20  151.10
   7  15   515954.10  302.90
   7  15   6  114.50   11.80
   7  15   7 4723.60  126.50
   7  15   8    3.20   12.70
   7  15   9 8386.00  185.20
   7  15  10 1421.20   49.50
   7  15  11  100.50   15.70
   7  15  12 5137.80  134.90
   7  15  13  111.90   17.30
   7  15  14 2201.10   68.70
   7  15  15   21.70   14.70
   7  15  16 1043.10   44.20
   7  15  17 3176.10   93.00
   7  15  18  390.70   29.50
   7  15  19 4172.20  129.40
   7  15  20 1846.70   78.50
   7  15  21  -26.00   30.00
   7  15  22 3064.40  111.70
   7  15  23  519.80   38.70
   7  15  24  652.40   42.30
   7  15  25  563.30   49.60
   7  15  26 1740.10   91.30
   7  15  27  777.20   50.20
   7  16 -29 1873.00  106.40
   7  16 -28  -28.70   37.70
   7  16 -27 2018.00   91.60
   7  16 -26  811.70   47.90
   7  16 -25  294.10   32.20
   7  16 -24  366.10   38.00
   7  16 -23  229.20   28.70
   7  16 -22  169.20   26.20
   7  16 -21  506.40   37.20
   7  16 -20 2411.40   91.40
   7  16 -19  -13.40   22.10
   7  16 -18 3815.80  123.60
   7  16 -17    4.00   18.80
   7  16 -16   76.60   20.80
   7  16 -15 9724.10  244.70
   7  16 -14 5374.40  146.80
   7  16 -1313567.70  322.80
   7  16 -12 1911.70   62.60
   7  16 -11 8203.40  166.80
   7  16 -10 2970.50   67.30
   7  16  -9 7173.00  143.80
   7  16  -8  672.00   21.30
   7  16  -7 1167.90   40.20
   7  16  -6 3342.90   87.30
   7  16  -5 2603.60   70.50
   7  16  -4 1586.10   48.10
   7  16  -3  108.70   13.10
   7  16  -2   24.10   12.30
   7  16  -1 5104.10  120.30
   7  16   0  363.00   21.00
   7  16   1 3392.20   96.40
   7  16   2  189.40   18.80
   7  16   3 2339.80   77.80
   7  16   4   62.00   17.30
   7  16   5  285.40   21.00
   7  16   6  894.20   41.10
   7  16   7 6804.70  172.00
   7  16   8  192.00   22.50
   7  16   9 3640.40  113.70
   7  16  10  335.30   28.90
   7  16  11 2599.80   89.20
   7  16  12  767.50   39.60
   7  16  13  469.30   33.60
   7  16  14  981.10   44.20
   7  16  15  137.60   23.10
   7  16  16 3242.00  124.00
   7  16  17  328.70   30.30
   7  16  18  174.20   26.00
   7  16  19  285.40   27.00
   7  16  20 3903.40  139.10
   7  16  21 2426.20   94.30
   7  16  22   24.60   24.40
   7  16  23 2713.10  107.00
   7  16  24 1326.70   74.20
   7  16  25  319.90   35.70
   7  16  26   20.20   20.50
   7  17 -28  649.90   98.40
   7  17 -27 2090.80  115.80
   7  17 -26 1764.20  109.00
   7  17 -25  155.40   39.50
   7  17 -24  413.70   45.90
   7  17 -23  222.10   33.70
   7  17 -22  400.80   48.70
   7  17 -21 1488.10   88.50
   7  17 -20   20.60   30.50
   7  17 -19 2783.50  126.40
   7  17 -18 3349.40  138.90
   7  17 -17  158.60   36.80
   7  17 -16   31.80   25.30
   7  17 -15  287.30   38.00
   7  17 -14 4359.80  160.50
   7  17 -13 1316.90   70.70
   7  17 -12  311.90   32.40
   7  17 -1111648.10  374.60
   7  17 -10 1118.00   61.50
   7  17  -9 7210.60  235.20
   7  17  -8 2269.70   89.80
   7  17  -7   39.00    9.90
   7  17  -6 4426.90  112.90
   7  17  -5  607.40   27.40
   7  17  -4   60.50   11.60
   7  17  -3   91.20   13.80
   7  17  -2 5294.70  132.70
   7  17  -1  317.90   22.00
   7  17   0   21.10   13.80
   7  17   1 1183.30   44.90
   7  17   2 8815.70  222.40
   7  17   311127.20  271.70
   7  17   411747.70  284.90
   7  17   522816.50  517.10
   7  17   6 3254.60   95.00
   7  17   710584.90  262.50
   7  17   820143.20  495.20
   7  17   9 9348.20  249.20
   7  17  10  690.70   40.10
   7  17  11   63.40   20.20
   7  17  12 1359.50   56.00
   7  17  13 5808.70  169.60
   7  17  14  119.50   23.20
   7  17  15 2320.80   87.90
   7  17  16  302.80   27.90
   7  17  17  655.10   42.90
   7  17  18  924.00   46.50
   7  17  19   31.10   25.80
   7  17  20   99.90   26.10
   7  17  21    9.00   19.70
   7  17  22   59.00   30.90
   7  17  23  656.10   60.50
   7  17  24  193.80   33.90
   7  17  25  -23.60   25.00
   7  18 -27  173.90   74.20
   7  18 -26  -65.80   55.00
   7  18 -25  329.50   80.90
   7  18 -24  734.90  100.80
   7  18 -23  285.80   53.60
   7  18 -22  400.00   66.90
   7  18 -21  -22.10   56.20
   7  18 -20 1442.90   88.10
   7  18 -19   33.80   27.30
   7  18 -18  822.00   61.90
   7  18 -17  103.70   27.70
   7  18 -16  680.20   52.40
   7  18 -15 1744.70   87.50
   7  18 -1410769.10  337.00
   7  18 -13 3173.40  129.30
   7  18 -12  758.00   51.80
   7  18 -11 6671.80  229.90
   7  18 -1018683.70  561.90
   7  18  -912432.70  395.90
   7  18  -810254.80  319.70
   7  18  -7 2487.20   97.70
   7  18  -6  739.30   46.80
   7  18  -5 2425.70  102.90
   7  18  -4  476.60   38.70
   7  18  -3 8358.10  207.50
   7  18  -2  142.70   17.10
   7  18  -1 3967.00  107.70
   7  18   0  197.60   20.00
   7  18   1 1013.10   43.20
   7  18   2 3200.10   96.60
   7  18   3 2287.90   75.20
   7  18   4 2489.30   76.90
   7  18   5  300.90   29.30
   7  18   6 1311.60   49.50
   7  18   7  303.70   25.80
   7  18   8  453.20   31.90
   7  18   9    6.20   18.90
   7  18  10 1455.40   62.20
   7  18  11   66.50   24.00
   7  18  1210991.70  286.20
   7  18  13   22.40   17.90
   7  18  14 2847.80  108.40
   7  18  15  196.40   22.20
   7  18  16  422.20   33.90
   7  18  17   34.10   21.70
   7  18  18   47.40   22.00
   7  18  19  590.40   38.20
   7  18  20   29.40   19.90
   7  18  21  128.20   30.10
   7  18  22  230.10   30.30
   7  18  23  162.20   30.20
   7  18  24 2396.10  102.10
   7  19 -26  304.90   67.50
   7  19 -25  106.50   46.50
   7  19 -24  324.70   77.00
   7  19 -23    7.90   53.60
   7  19 -22  111.20   44.80
   7  19 -21  154.40   46.30
   7  19 -20  306.00   66.30
   7  19 -19  244.20   71.80
   7  19 -18 1053.40   84.50
   7  19 -17  -13.40   44.70
   7  19 -16 1164.60  105.20
   7  19 -15 2031.60  159.00
   7  19 -14 1025.10  116.30
   7  19 -13 5130.30  317.50
   7  19 -12 2121.70  168.50
   7  19 -11  235.60   53.10
   7  19 -10   81.60   52.30
   7  19  -9 1339.10  106.00
   7  19  -8  740.30   75.50
   7  19  -7 2047.60   85.00
   7  19  -6 3126.40  127.40
   7  19  -5 1887.30   81.10
   7  19  -4 5819.40  197.30
   7  19  -3   41.00   21.40
   7  19  -2 1037.30   54.10
   7  19  -1 3757.70  137.00
   7  19   0   74.70   15.30
   7  19   1 4474.70  126.90
   7  19   2  598.20   32.10
   7  19   3 3263.50  106.00
   7  19   4 1512.70   69.10
   7  19   5 1375.30   55.00
   7  19   6  367.00   26.60
   7  19   712689.10  325.20
   7  19   810522.20  295.80
   7  19   9 6349.60  189.20
   7  19  10 3603.30  122.10
   7  19  11  316.30   29.10
   7  19  12 1110.40   53.80
   7  19  13  300.80   27.10
   7  19  14  446.30   34.50
   7  19  15  552.60   34.30
   7  19  16 1100.10   59.50
   7  19  17  544.60   34.30
   7  19  18  747.90   42.80
   7  19  19  579.20   40.60
   7  19  20  260.30   31.90
   7  19  21  764.70   52.90
   7  19  22  260.40   43.00
   7  19  23 1930.80  103.60
   7  20 -24  380.60   64.70
   7  20 -23 2724.90  179.10
   7  20 -22  111.30   57.20
   7  20 -21  261.50   69.30
   7  20 -20 1262.60  121.90
   7  20 -19  265.40   56.70
   7  20 -18 1034.50  104.30
   7  20 -17 2078.80  146.60
   7  20 -16   32.10   42.20
   7  20 -15 3706.70  255.10
   7  20 -14  435.90   66.90
   7  20 -13  600.90   82.70
   7  20 -12   70.20   51.80
   7  20 -11 5039.30  315.60
   7  20 -10  275.80   72.10
   7  20  -9  118.70   54.90
   7  20  -8  269.40   62.40
   7  20  -7 1012.50   88.10
   7  20  -6  510.70   72.40
   7  20  -5 1597.20  139.10
   7  20  -4   95.80   53.80
   7  20  -3 1408.40  112.90
   7  20  -2  802.40  102.10
   7  20  -1   64.20   44.90
   7  20   0  704.90   84.90
   7  20   1  163.20   57.90
   7  20   2 2242.60  160.70
   7  20   3  754.80   79.40
   7  20   4 2366.90  146.70
   7  20   5  149.70   27.60
   7  20   6 3298.70  141.40
   7  20   7  962.00   60.30
   7  20   8  591.40   50.10
   7  20   9 2234.30  110.90
   7  20  10   32.00   27.20
   7  20  11  511.60   43.80
   7  20  12 5576.10  226.10
   7  20  13  243.90   33.00
   7  20  14 1364.70   87.30
   7  20  15 1003.30   63.60
   7  20  16 2423.30  123.10
   7  20  17 5456.10  215.20
   7  20  18 1708.20   99.50
   7  20  19 2121.80  111.70
   7  20  20   -9.30   32.40
   7  20  21  705.30   62.00
   7  21 -23 2295.50  189.80
   7  21 -22  766.60  113.60
   7  21 -21 1047.40  115.80
   7  21 -20  -72.10   36.80
   7  21 -19  210.00   52.60
   7  21 -18 1237.20  123.50
   7  21 -17  736.10   69.00
   7  21 -16 1048.40  112.50
   7  21 -15 1452.50  130.50
   7  21 -14  750.90   95.30
   7  21 -13  718.60   87.20
   7  21 -12 1006.10  107.30
   7  21 -11 1193.30  108.10
   7  21 -10  110.50   38.20
   7  21  -9  645.50   84.70
   7  21  -8   67.20   44.70
   7  21  -7   74.80   49.10
   7  21  -6  128.90   70.20
   7  21  -5 2167.10  157.10
   7  21  -4 1726.10  150.70
   7  21  -3  511.70   73.30
   7  21  -2  344.40   76.20
   7  21  -1 9865.60  518.60
   7  21   0 2172.10  173.40
   7  21   1 5252.30  294.00
   7  21   2  309.70   56.60
   7  21   3 1407.80  120.70
   7  21   4  454.70   68.80
   7  21   5 4097.60  265.20
   7  21   6  -38.80   38.10
   7  21   7 4911.90  286.00
   7  21   8   79.80   46.10
   7  21   9  872.90   80.10
   7  21  10  714.80   76.40
   7  21  11  444.90   64.70
   7  21  12  181.10   32.20
   7  21  13  151.40   32.50
   7  21  14  592.60   42.70
   7  21  15   24.00   29.30
   7  21  16   -4.90   32.50
   7  21  17   77.20   34.70
   7  21  18   80.80   35.20
   7  21  19   58.30   28.90
   7  21  20  116.30   30.70
   7  22 -21    2.40   51.70
   7  22 -20  -84.50   53.00
   7  22 -19  334.80   79.80
   7  22 -18  273.40   67.80
   7  22 -17  399.90   75.70
   7  22 -16  394.60   57.10
   7  22 -15  390.10   65.70
   7  22 -14  921.40  109.70
   7  22 -13 1270.90  113.80
   7  22 -12    8.30   38.10
   7  22 -11 2849.10  184.10
   7  22 -10  500.70   71.90
   7  22  -9 1187.90  126.10
   7  22  -8   46.20   44.70
   7  22  -7 4152.50  256.50
   7  22  -6 3813.10  238.90
   7  22  -5 1968.80  160.20
   7  22  -4 2189.30  179.00
   7  22  -3 1156.00  111.90
   7  22  -2 1620.90  149.80
   7  22   0 1423.40  129.70
   7  22   1 2205.30  160.80
   7  22   2   -3.70   48.30
   7  22   3 3415.60  213.70
   7  22   4  144.00   57.40
   7  22   5  251.00   59.60
   7  22   6  313.90   60.40
   7  22   7 2051.60  142.80
   7  22   8  -72.90   41.50
   7  22   9 2970.20  180.40
   7  22  10  722.00   98.30
   7  22  11 1393.00   90.90
   7  22  12  535.80   81.70
   7  22  13  160.00   43.90
   7  22  14   48.60   39.50
   7  22  15  518.40   79.80
   7  22  16 2228.60  164.60
   7  22  17 5698.60  333.80
   7  22  18  679.30   92.00
   7  23 -20   25.90   41.40
   7  23 -19   12.10   40.50
   7  23 -18   83.60   55.70
   7  23 -17  259.40   66.90
   7  23 -16   45.90   67.00
   7  23 -15  497.10   73.80
   7  23 -14  323.70   73.80
   7  23 -13  -72.90   49.70
   7  23 -12 2029.30  160.20
   7  23 -11   25.50   45.40
   7  23 -10  412.10   66.80
   7  23  -9  306.70   55.90
   7  23  -8  -24.40   35.20
   7  23  -7  749.30   79.30
   7  23  -6  376.90   75.50
   7  23  -5  -56.70   44.50
   7  23  -4   97.00   32.70
   7  23  -3   61.20   47.60
   7  23  -2 2402.60  175.60
   7  23  -1 1105.70   91.00
   7  23   0 2575.90  163.80
   7  23   1 2870.00  188.10
   7  23   2 2026.30  161.50
   7  23   3 1148.40   99.20
   7  23   4  993.10  112.70
   7  23   5   40.30   38.30
   7  23   6 1290.20  103.30
   7  23   7  761.00   79.60
   7  23   8  413.30   60.70
   7  23   9   55.20   37.10
   7  23  10   73.10   45.70
   7  23  11   -3.50   35.60
   7  23  12 1026.40  119.40
   7  23  13   66.40   45.00
   7  23  14  152.30   45.40
   7  23  15  998.50   98.30
   7  23  16  325.70   61.10
   7  24 -17  121.20   54.00
   7  24 -16  335.70   68.20
   7  24 -15  -56.20   53.30
   7  24 -14  462.60   89.30
   7  24 -13  211.00   65.60
   7  24 -12  178.70   60.90
   7  24 -11   -8.70   55.40
   7  24 -10   55.60   53.60
   7  24  -9   77.60   44.90
   7  24  -8 1035.80  105.20
   7  24  -7  639.70   77.10
   7  24  -6 1056.80   96.40
   7  24  -5  395.20   57.40
   7  24  -4 1990.30  130.30
   7  24  -3  188.00   59.60
   7  24  -2  237.50   53.60
   7  24  -1  470.40   60.50
   7  24   0 1219.30   96.90
   7  24   1   71.70   44.50
   7  24   2 3720.40  210.80
   7  24   3  -12.90   41.30
   7  24   4  198.90   50.10
   7  24   5  768.40   83.90
   7  24   6  342.20   51.30
   7  24   7  554.90   79.70
   7  24   8   73.10   43.50
   7  24   9  180.10   56.10
   7  24  10  124.50   54.80
   7  24  11  679.00   64.70
   7  24  12  -44.20   37.40
   7  24  13   12.10   40.00
   7  24  14   92.10   40.90
   7  25 -15  601.80   91.10
   7  25 -14  -34.80   46.60
   7  25 -13  186.10   52.40
   7  25 -12  357.10   76.60
   7  25 -11   60.20   47.40
   7  25 -10  299.30   58.90
   7  25  -9  798.00   99.60
   7  25  -8  966.00  110.20
   7  25  -7  459.10   74.30
   7  25  -6 2572.10  216.10
   7  25  -5   41.10   38.80
   7  25  -4  249.80   70.70
   7  25  -3  192.00   60.70
   7  25  -2 1256.50  114.50
   7  25  -1  -36.00   43.60
   7  25   0 2085.00  162.90
   7  25   1 4053.50  281.50
   7  25   2   25.10   53.40
   7  25   3 2365.20  173.80
   7  25   4 1073.10  111.70
   7  25   5   -7.70   48.00
   7  25   6  764.30  101.30
   7  25   7 1519.30  139.10
   7  25   8  425.50   67.80
   7  25   9 2692.30  195.80
   7  25  10   24.20   45.80
   7  25  11  772.60  104.70
   7  26 -11 2390.00  214.50
   7  26 -10 2024.10  197.20
   7  26  -9  920.40  105.30
   7  26  -8  632.10   86.30
   7  26  -7  653.80   81.60
   7  26  -6  296.00   63.10
   7  26  -5  328.20   51.50
   7  26  -4   41.70   51.20
   7  26  -3  354.90   75.70
   7  26  -2  197.40   57.30
   7  26  -1  214.20   63.00
   7  26   0  847.10  101.40
   7  26   1   52.20   47.20
   7  26   2  185.80   46.20
   7  26   3   30.80   35.80
   7  26   4 3073.60  205.50
   7  26   5   49.10   50.40
   7  26   6 1496.40  129.10
   7  26   7   26.50   47.60
   7  27  -3 1025.40  114.40
   7  27  -2 1247.20  121.90
   7  27  -1   69.20   51.80
   7  27   0  895.60   99.90
   8   0 -36 2248.30  133.40
   8   0 -35   27.20   35.10
   8   0 -34  493.10   56.60
   8   0 -33  -45.70   28.10
   8   0 -32 1656.20   85.60
   8   0 -31   41.60   31.30
   8   0 -30  496.30   54.80
   8   0 -29    2.20   31.00
   8   0 -28   64.30   29.40
   8   0 -27  -48.30   29.80
   8   0 -26  468.80   47.00
   8   0 -25    1.60   29.20
   8   0 -24   -7.30   19.90
   8   0 -23  -66.90   34.20
   8   0 -22 1367.20   62.30
   8   0 -21  -97.20   56.10
   8   0 -2026541.60  975.70
   8   0 -19  -37.90   26.80
   8   0 -18  283.80   27.90
   8   0 -17   17.00   20.20
   8   0 -16 2359.50   86.20
   8   0 -15   13.30   19.50
   8   0 -14  371.50   29.60
   8   0 -13   37.90   17.10
   8   0 -12  121.50   15.20
   8   0 -11   16.10   11.60
   8   0 -10 8854.90  211.50
   8   0  -9   29.50   10.80
   8   0  -816486.60  373.90
   8   0  -7   14.40   10.20
   8   0  -6  818.70   26.90
   8   0  -5   24.80    9.20
   8   0  -3   35.00   10.40
   8   0  -1    3.40    8.00
   8   0   0   35.10    7.80
   8   0   1   18.20    7.60
   8   0   2   12.60    7.50
   8   0   3   20.00    9.80
   8   0   4  289.30   15.90
   8   0   5    5.20   10.90
   8   0   6 5739.20  182.50
   8   0   7   21.20   14.70
   8   0   8   26.80   17.70
   8   0   9   19.30   15.80
   8   0  10 5774.30  274.40
   8   0  11    9.10   18.80
   8   0  1216534.10  475.10
   8   0  13   74.10   20.80
   8   0  14 7464.00  210.90
   8   0  15   -4.30   22.00
   8   0  16  447.30   24.00
   8   0  17    8.80   17.90
   8   0  18 4484.80  149.40
   8   0  19   16.90   24.70
   8   0  20  100.90   29.10
   8   0  21  -75.30   26.40
   8   0  2211227.50  366.60
   8   0  23   32.00   35.00
   8   0  24 2354.80  118.00
   8   0  25   30.60   30.80
   8   0  26  172.70   35.40
   8   0  27   67.80   36.00
   8   0  28  361.40   40.50
   8   0  29   -9.50   34.30
   8   0  30   24.60   38.50
   8   0  31    3.30   29.60
   8   0  32  498.10   80.70
   8   1 -36   55.70   28.60
   8   1 -35  301.90   30.30
   8   1 -34    0.40   21.00
   8   1 -33    4.10   18.70
   8   1 -32   63.90   25.70
   8   1 -31  485.50   32.20
   8   1 -30  149.30   24.00
   8   1 -29  -29.60   23.90
   8   1 -28   27.40   21.00
   8   1 -27  215.20   27.00
   8   1 -26 2297.60   68.90
   8   1 -25   -3.10   18.30
   8   1 -24  870.70   35.20
   8   1 -23  106.90   19.10
   8   1 -2236118.00  752.50
   8   1 -2062407.00 2130.10
   8   1 -19 2174.10   58.90
   8   1 -18 6225.60  135.10
   8   1 -17 1838.90   50.60
   8   1 -16   21.40   15.90
   8   1 -15 1124.00   36.80
   8   1 -14 5721.70  125.30
   8   1 -13  664.70   23.10
   8   1 -12 8725.20  159.60
   8   1 -11 7247.00  119.10
   8   1 -10   99.40    8.10
   8   1  -9 3982.10   70.30
   8   1  -8 2589.90   49.70
   8   1  -7 4487.40   75.60
   8   1  -6 3897.80   60.20
   8   1  -5 4473.10   66.30
   8   1  -430962.30  433.40
   8   1  -333008.20  459.70
   8   1  -245812.90  748.60
   8   1  -1  727.40   15.30
   8   1   0  130.70    7.00
   8   1   1 2738.80   43.90
   8   1   2 3994.30   61.90
   8   1   3  162.30    8.30
   8   1   416006.70  255.40
   8   1   5 2879.40   72.70
   8   1   6 7892.00  174.90
   8   1   7  848.90   29.10
   8   1   8 4010.20   95.00
   8   1   9 1187.30   35.00
   8   1  10 2833.50   73.10
   8   1  11 8507.90  199.20
   8   1  12  266.20   21.40
   8   1  13   32.50   15.60
   8   1  14  842.60   30.00
   8   1  15 4659.80  103.10
   8   1  16   54.70   18.50
   8   1  17 3490.20   86.00
   8   1  18  897.10   35.00
   8   1  19 3842.40   94.80
   8   1  20  -14.10   18.00
   8   1  21  717.90   36.50
   8   1  22 1906.20   63.80
   8   1  23   95.70   25.60
   8   1  24 6108.00  165.20
   8   1  25  588.90   37.10
   8   1  26   77.20   23.60
   8   1  27   -9.00   20.00
   8   1  28  -12.30   24.00
   8   1  29  698.40   47.20
   8   1  30  469.90   38.40
   8   1  31  176.00   25.70
   8   1  32  392.90   71.70
   8   2 -36  272.00   34.90
   8   2 -35  275.60   31.70
   8   2 -34  378.50   34.30
   8   2 -33   -9.40   23.60
   8   2 -32 1218.20   47.70
   8   2 -31  190.60   30.70
   8   2 -30  379.70   29.70
   8   2 -29  709.50   37.70
   8   2 -28  985.70   45.30
   8   2 -27  632.60   36.90
   8   2 -26 2366.90   71.90
   8   2 -25 4146.00  104.70
   8   2 -24  252.10   22.80
   8   2 -23  -10.50   19.30
   8   2 -22 4896.00  112.60
   8   2 -21 7194.80  151.70
   8   2 -20   80.60   20.20
   8   2 -19   90.10   16.50
   8   2 -18  180.80   18.60
   8   2 -17  934.00   30.50
   8   2 -16 1435.90   43.90
   8   2 -15 2841.80   68.30
   8   2 -14   94.70   10.30
   8   2 -13 8322.70  140.00
   8   2 -12  512.30   17.30
   8   2 -11  672.70   18.70
   8   2 -10   23.80    8.20
   8   2  -9 2360.80   46.00
   8   2  -8 4007.10   70.40
   8   2  -7 1663.10   31.00
   8   2  -6 1344.90   27.60
   8   2  -5 2182.70   36.90
   8   2  -4 6786.70   95.40
   8   2  -3 2578.70   41.20
   8   2  -2 3219.90   49.70
   8   2  -1  889.60   18.00
[truncated: 512,027 more chars]
